# Supplementary material for: Direct C–H fluorination/heteroarylation of oxindoles with quinoxalin-2(1H)-ones using Selectfluor
Source: Royal Society of Chemistry journal article supplement (doi:10.1039/d5ob00427f), 2025-01-01
Supplement: d5ob00427f1.pdf [file d5ob00427f1.pdf]

# Supporting Information

## **Direct C-H Fluorination/Heteroarylation of Oxindoles with Quinoxalin-2(1H)-ones Using Selectfluor**

Hui Qin, Guo-Liang Wei, Wen-Geng Xie, Xiao-Hong Mao, Fu-Wei Wang, Mei-Hua

Bao, Xiao-Wei Zheng, Yi-Wen Zhang, Ping Huang

## List of Contents

|                                                              |         |
|--------------------------------------------------------------|---------|
| 1. General information                                       | S2      |
| 2. General procedure for the synthesis of starting materials | S2      |
| 3. General procedure for the synthesis of 3a-3ar             | S2-3    |
| 4. The mechanistic studies                                   | S3-9    |
| 5. X-ray Structure and Data of <b>3m</b>                     | S10-12  |
| 6. Characterization of products                              | S13-31  |
| 7. References                                                | S31     |
| 8. Copies of NMR and HR-ESI-MS Spectra                       | S31-118 |

## 1. General information

Unless stated otherwise, all reactions for preparing compound **3a-aj** were carried out under an air atmosphere. All reagents and solvents were of commercial quality and were used without further purification. Purification was carried out according to standard laboratory methods<sup>[1]</sup>. All reactions were monitored by TLC analysis with silica gel-coated plates with fluorescent indicator UV254. <sup>1</sup>H and <sup>13</sup>C NMR spectra were obtained on either a Bruker AV 300 at 400 MHz and 100 MHz, respectively. Chemical shifts are reported in ppm and coupling constants are reported in Hz with TMS at 0.0 ppm (<sup>1</sup>H and <sup>13</sup>C) or CDCl<sub>3</sub> referenced at 7.26 (<sup>1</sup>H) and 77.0 ppm (<sup>13</sup>C) and DMSO-*d*<sub>6</sub> referenced at 2.50 (<sup>1</sup>H) and 39.5 (<sup>13</sup>C). Mass spectra were measured with an Orbitrap Exploris™ 120 mass spectrometer using ESI ionization.

## 2. General procedure for the synthesis of starting materials<sup>[2]</sup>

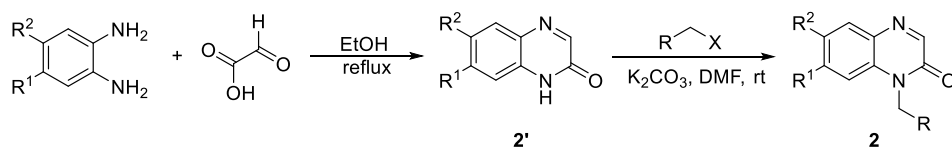

Glyoxylic acid (1.1 equiv.) was added into a suspension of *o*-arylenediamine (1.0 equiv.) in ethanol (1 mol/L). The reaction mixture was stirred and heated at reflux in an oil bath for 2 h, then at room temperature for 1 h until the reaction completed. The precipitated solid was filtered and washed with ethanol, then dried to give quinoxalinone **2'**. For alkylation, the corresponding alkyl halide (1.6 equiv.) was added to a suspension of quinoxalinone **2'** (1 equiv.) and potassium carbonate (1.2 equiv.) in DMF. The reaction mixture was stirred at room temperature overnight. When TLC analysis indicated that the quinoxalinone disappeared, the reaction mixture was washed with saturated solution of ammonium chloride, ethyl acetate and water. The organic layer was separated and the aqueous layer was extracted twice with ethyl acetate. The combined organic layers were dried with anhydrous MgSO<sub>4</sub>, filtered and concentrated under reduced pressure. The resulting organic residue was purified by column chromatography over silica gel to afford the desired product **2**.

## 3. General procedure for the synthesis of 3a-3ar

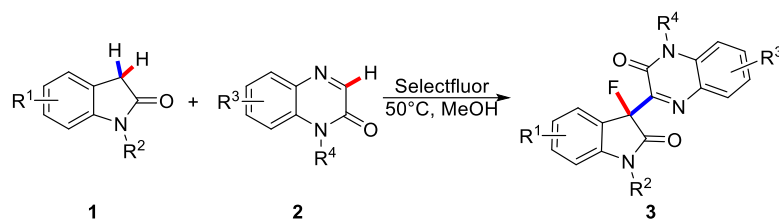

Different substituted oxindole **1** (0.2 mmol, 1.0 equiv.) and various quinoxalin-2-one **2** (0.24 mmol, 1.2 equiv.) was dissolved with 2 ml methanol (MeOH) and was treated with Selectfluor (0.4 mmol, 2.0 equiv.) at 50 °C under air atmosphere in a 10 mL thick-walled ground test tube. Then mixture was stirred until the reaction completed. The progress of the reaction was monitored by TLC. After that, the reaction mixture was washed with saturated solution of ammonium chloride, dichloromethane (DCM) and water. The organic layer was separated and the aqueous layer was extracted twice with dichloromethane. The combined organic layers were dried with anhydrous MgSO<sub>4</sub>, filtered and concentrated under reduced pressure. The resulting organic residue was purified using column chromatography over silica gel to give the desired product **3** with dichloromethane/methanol (50:0 to 20:1).

## 4. The mechanistic studies

### 4.1 The Control experiments

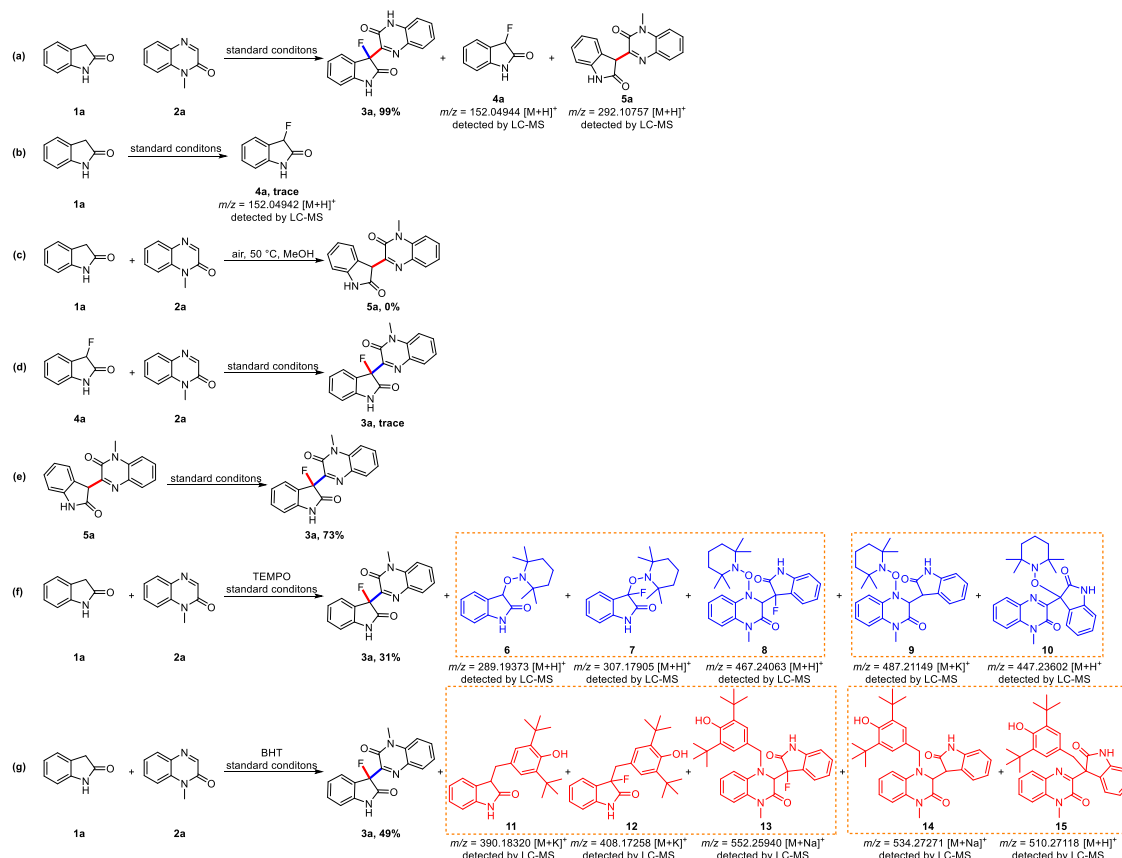



- (a) Oxindole (**1a**, 0.2 mmol), 1-methylquinoxalin-2-one (**2a**, 0.24 mmol, 1.2 equiv.), selectfluor (0.4 mmol, 2.0 equiv.) were added to a 10 mL thick-walled ground test tube with a magnetic stirring bar, then the reaction mixture was dissolved and stirred at 50 °C for 4 h until the reaction completed. the desired product **3a** was obtained in 99% yield. Meanwhile, **4a** and **5a** were detected by HRMS from the reaction solution, indicating that they might be intermediates in the reaction.
- (b) Oxindole (**1a**, 0.5 mmol) and selectfluor (1.0 mmol, 2.0 equiv.) were added to a 10 mL thick-walled ground test tube with a magnetic stirring bar, then the reaction mixture was dissolved and stirred at 50 °C for 30 h. the desired product **4a** was not obtained from the reaction. However, **4a** was detected by HRMS from the reaction solution, indicating that **4a** might be a secondary intermediate of the reaction and participated in a secondary pathway.
- (c) Oxindole (**1a**, 0.2 mmol) and 1-methylquinoxalin-2-one (**2a**, 0.24 mmol, 1.2 equiv.) were added to a 10 mL thick-walled ground test tube with a magnetic stirring bar, then the reaction mixture was dissolved and stirred at 50 °C for 12 h. the desired product **5a** was not observed in reaction process via TLC monitored and was not afforded from the reaction. Meanwhile, **5a** was not detected by HRMS from the reaction solution, indicating that it could not react in the absence of selectfluor.
- (d) 3-Fluoro-2-oxindole (**4a**, 0.1 mmol), 1-methylquinoxalin-2-one (**2a**, 0.12 mmol, 1.2 equiv.), selectfluor (0.2 mmol, 2.0 equiv.) were added to a 10 mL thick-walled ground test tube with a magnetic stirring bar, then the reaction mixture was dissolved and stirred at 50 °C for 12 h until the reaction completed. the desired product **3a** was observed in reaction process via TLC monitored and was not afforded from the reaction, illustrating that **4a** might be a secondary intermediate of the reaction and participated in a secondary pathway.
- (e) 3-(1-Methylquinoxalin-2-one) indolin-2-one (**5a**, 0.1 mmol) and selectfluor (0.2 mmol, 2.0 equiv.) were added to a 10 mL thick-walled ground test tube with a magnetic stirring bar, then the reaction mixture was dissolved and stirred at 50 °C for 12 h until the reaction completed. the desired product **3a** was afforded in 73% yield indicating that **5a** was main intermediate and involve in the main reaction pathway in the reaction process.
- (f) Oxindole (**1a**, 0.2 mmol), 1-methylquinoxalin-2-one (**2a**, 0.24 mmol, 1.2 equiv.), selectfluor (0.4 mmol, 2.0 equiv.) and 2,2,6,6-tetramethyl-1-piperidinyloxy (TEMPO, 0.4 mmol, 2.0 equiv.) were added to a 10 mL thick-walled ground test tube with a magnetic stirring bar, then the reaction mixture was dissolved and stirred at 50 °C for 6 h until the reaction completed. the desired product **3a** was obtained in 31% yield. Furthermore, some free radical-trapping adducts **6-10** were detected by HRMS from the reaction solution, indicating that the reaction mechanism might consist of two radical reaction pathways, a primary pathway and a secondary pathway.
- (g) Oxindole (**1a**, 0.2 mmol), 1-methylquinoxalin-2-one (**2a**, 0.24 mmol, 1.2 equiv.), selectfluor (0.4 mmol, 2.0 equiv.) and Butylated hydroxytoluene (BHT, 0.4 mmol, 2.0 equiv.) were added

to a 10 mL thick-walled ground test tube with a magnetic stirring bar, then the reaction mixture was dissolved and stirred at 50 °C for 6 h until the reaction completed. the desired product **3a** was obtained in 49% yield. Furthermore, some free radical-trapping adducts **11-15** were detected by HRMS from the reaction solution, indicating that the reaction mechanism might consist of two radical reaction pathways, a primary pathway and a secondary pathway.

## 4.2 The HRMS spectra of compounds **4a**, **5a**, **6-15**

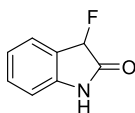

**4a**

**Compound 4a:** HRMS (m/z) [ESI]: calculated for  $C_8H_7ONF^+ [M+H]^+$ : 152.0506, found 152.04944.

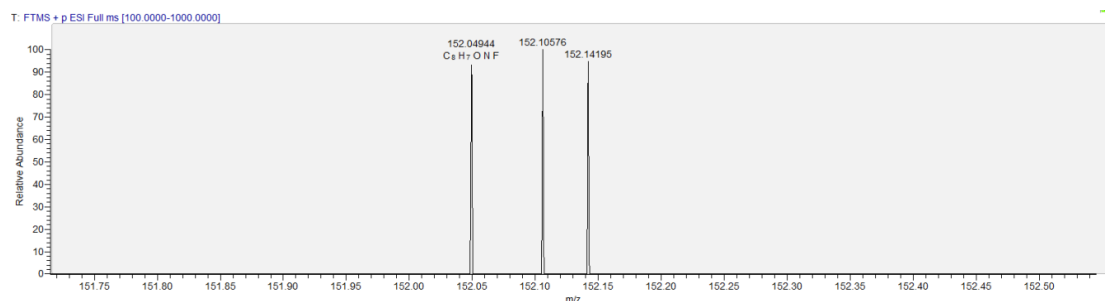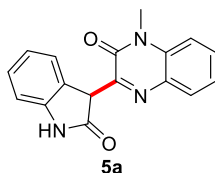

**5a**

**Compound 5a:** HRMS (m/z) [ESI]: calculated for  $C_{17}H_{14}O_2N_3^+ [M+H]^+$ : 292.1081, found 292.10757.

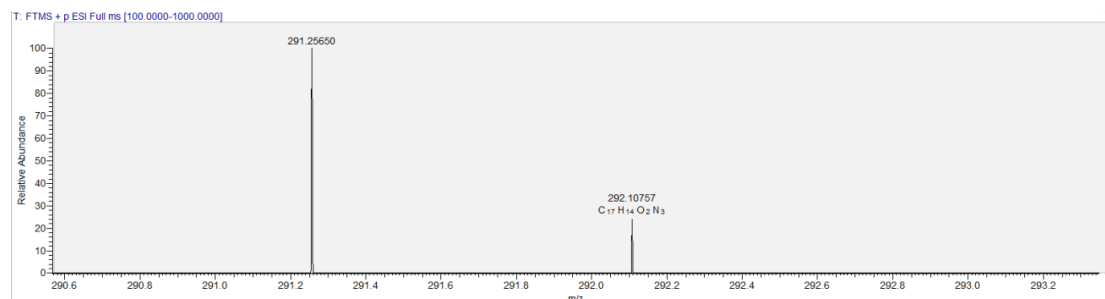

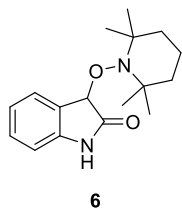

**Compound 6: HRMS (m/z) [ESI]:** calculated for  $C_{17}H_{25}O_2N_2$   $^+ [M+H]^+$ : 289.1911, found 289.19373.

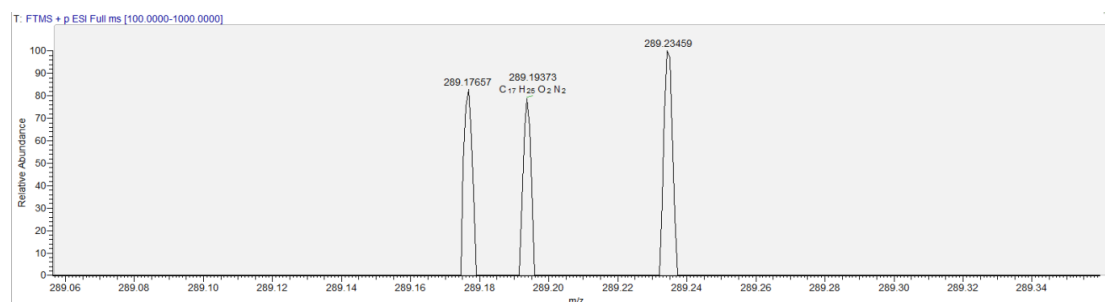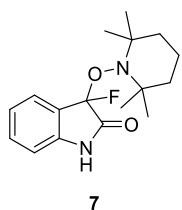

**Compound 7: HRMS (m/z) [ESI]:** calculated for  $C_{17}H_{24}O_2N_2F$   $^+ [M+H]^+$ : 307.1816, found 307.17905.

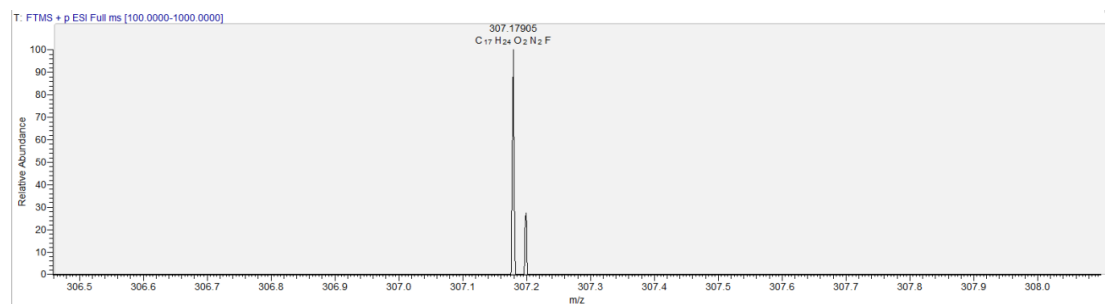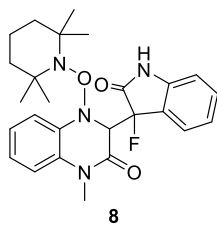

**Compound 8: HRMS (m/z) [ESI]:** calculated for  $C_{26}H_{32}O_3N_4F$   $^+ [M+H]^+$ : 467.2453, found 467.24063.

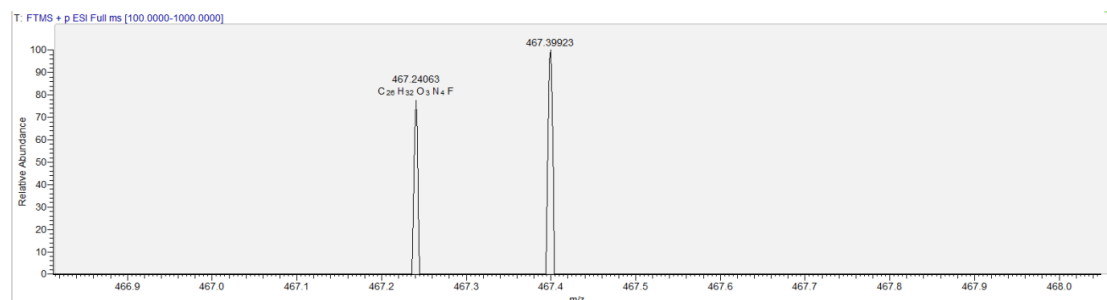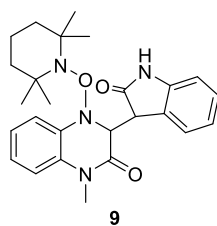

**Compound 9: HRMS (m/z) [ESI]:** calculated for C<sub>26</sub>H<sub>32</sub>O<sub>3</sub>N<sub>4</sub>K<sup>+</sup> [M+K]<sup>+</sup>: 487.2106, found 487.21149.

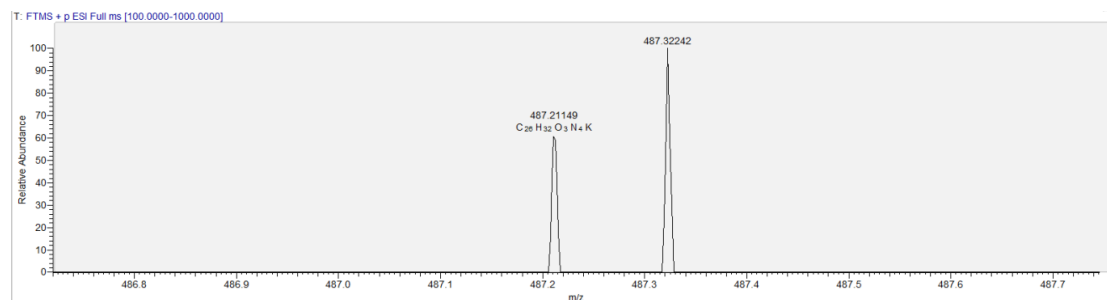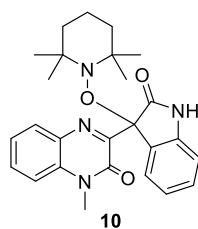

**Compound 10: HRMS (m/z) [ESI]:** calculated for C<sub>26</sub>H<sub>31</sub>O<sub>3</sub>N<sub>4</sub><sup>+</sup> [M+H]<sup>+</sup>: 447.2391, found 447.23602.

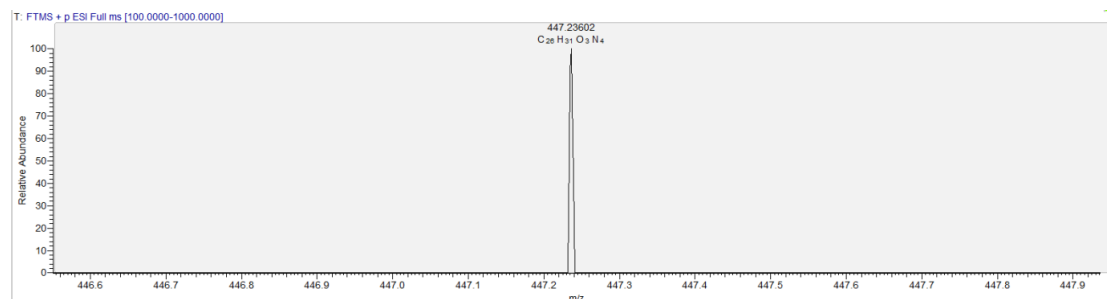

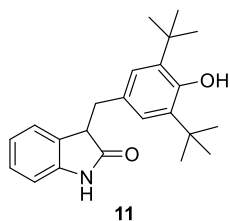

**Compound 11: HRMS (m/z) [ESI]:** calculated for  $C_{23}H_{29}O_2NK^+ [M+K]^+$ : 390.1830, found 390.18320.

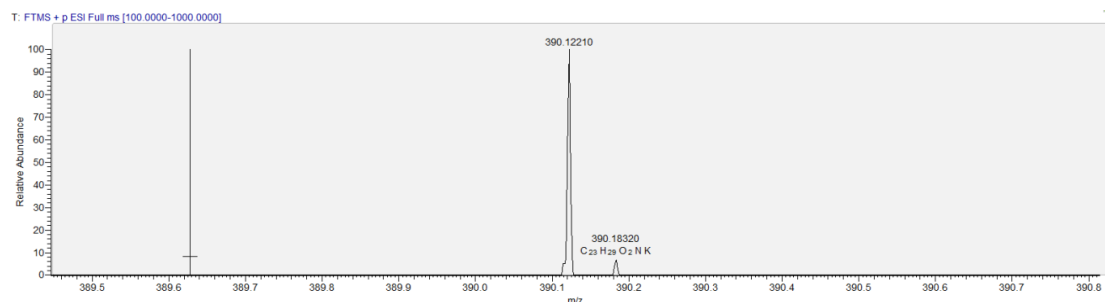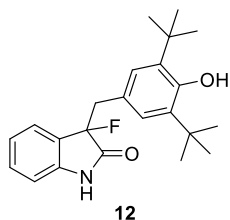

**Compound 12: HRMS (m/z) [ESI]:** calculated for  $C_{23}H_{28}O_2NFK^+ [M+K]^+$ : 408.1736, found 408.17258.

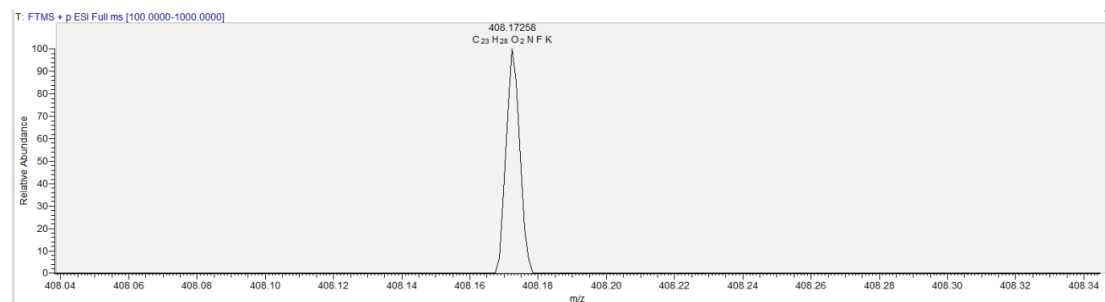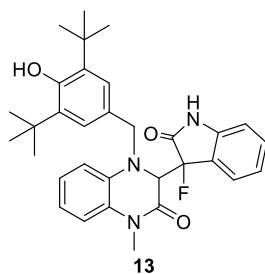

**Compound 13: HRMS (m/z) [ESI]:** calculated for  $C_{32}H_{36}O_3N_3FNa^+ [M+Na]^+$ : 552.2633, found 552.25940.

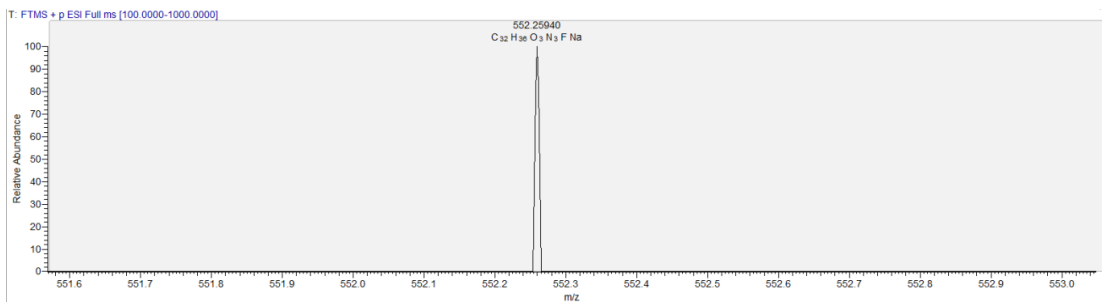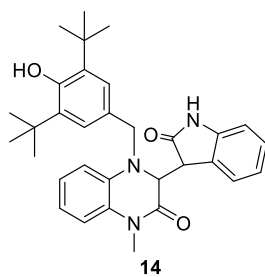

**Compound 14:** HRMS (m/z) [ESI]: calculated for  $C_{32}H_{37}O_3N_3Na^+ [M+Na]^+$ : 534.2727, found 534.27271.

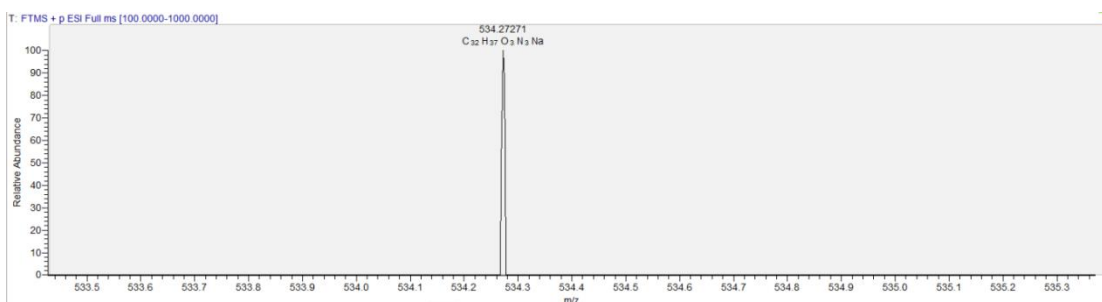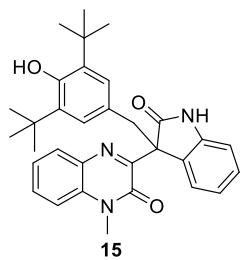

**Compound 15:** HRMS (m/z) [ESI]: calculated for  $C_{32}H_{36}O_3N_3^+ [M+H]^+$ : 510.2751, found 510.27118.

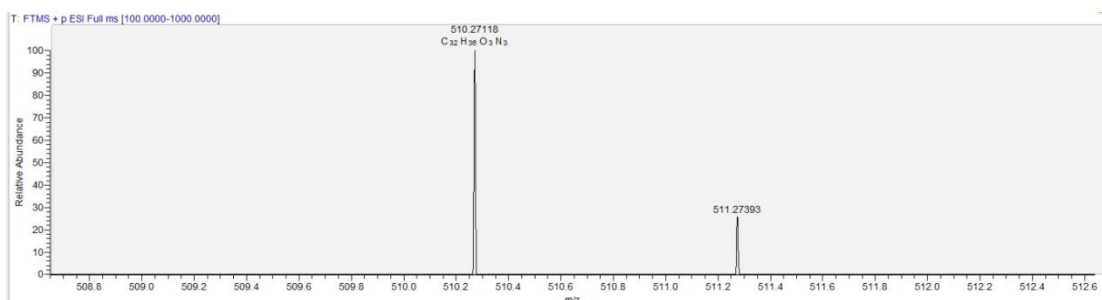

## 5. X-ray Structure and Data of 3m

Datablock 240114lu\_lgpz115096\_0m - cllipsoid plot

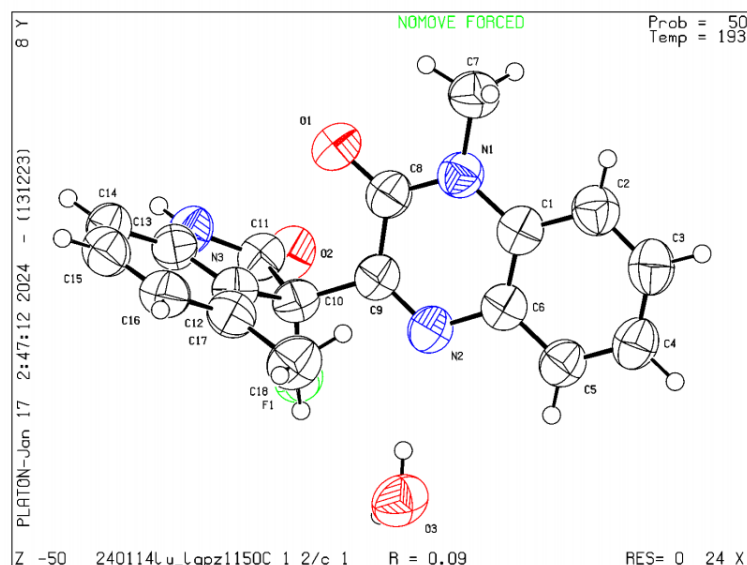

## 240114LU\_LGPZ115096\_0m

**Table 1 Crystal data and structure refinement for 240114LU\_LGPZ115096\_0m.**

|                                             |                                                                |
|---------------------------------------------|----------------------------------------------------------------|
| Identification code                         | 240114LU_LGPZ115096_0m                                         |
| Empirical formula                           | C <sub>18</sub> H <sub>16</sub> FN <sub>3</sub> O <sub>3</sub> |
| Formula weight                              | 341.34                                                         |
| Temperature/K                               | 193.00                                                         |
| Crystal system                              | monoclinic                                                     |
| Space group                                 | C2/c                                                           |
| a/Å                                         | 24.355(17)                                                     |
| b/Å                                         | 8.370(6)                                                       |
| c/Å                                         | 15.766(12)                                                     |
| α/°                                         | 90                                                             |
| β/°                                         | 100.14(2)                                                      |
| γ/°                                         | 90                                                             |
| Volume/Å <sup>3</sup>                       | 3164(4)                                                        |
| Z                                           | 8                                                              |
| ρ <sub>calc</sub> /cm <sup>3</sup>          | 1.433                                                          |
| μ/mm <sup>-1</sup>                          | 0.573                                                          |
| F(000)                                      | 1424.0                                                         |
| Crystal size/mm <sup>3</sup>                | 0.12 × 0.1 × 0.09                                              |
| Radiation                                   | GaKα (λ = 1.34139)                                             |
| 2θ range for data collection/°              | 9.738 to 121.496                                               |
| Index ranges                                | -31 ≤ h ≤ 26, -10 ≤ k ≤ 10, -19 ≤ l ≤ 20                       |
| Reflections collected                       | 17700                                                          |
| Independent reflections                     | 3535 [R <sub>int</sub> = 0.0814, R <sub>sigma</sub> = 0.0722]  |
| Data/restraints/parameters                  | 3535/0/229                                                     |
| Goodness-of-fit on F <sup>2</sup>           | 1.038                                                          |
| Final R indexes [I > 2σ (I)]                | R <sub>1</sub> = 0.0885, wR <sub>2</sub> = 0.2547              |
| Final R indexes [all data]                  | R <sub>1</sub> = 0.1329, wR <sub>2</sub> = 0.2953              |
| Largest diff. peak/hole / e Å <sup>-3</sup> | 0.36/-0.31                                                     |

**Table 2 Fractional Atomic Coordinates ( $\times 10^4$ ) and Equivalent Isotropic Displacement Parameters ( $\text{\AA}^2 \times 10^3$ ) for 240114LU\_LGPZ115096\_0m.  $U_{eq}$  is defined as 1/3 of the trace of the orthogonalised  $U_{ij}$  tensor.**

| Atom  | x           | y        | z           | U(eq)     |
|-------|-------------|----------|-------------|-----------|
| F(1)  | 5388.7 (8)  | 4746 (2) | 5969.1 (13) | 73.8 (6)  |
| O(1)  | 6944.8 (11) | 6834 (3) | 6770.7 (16) | 74.4 (8)  |
| O(2)  | 5813.5 (11) | 7441 (3) | 5127.3 (15) | 78.0 (8)  |
| N(1)  | 7371.7 (12) | 4471 (3) | 6540.3 (17) | 65.9 (8)  |
| N(2)  | 6303.8 (12) | 3193 (3) | 5978.6 (17) | 64.3 (8)  |
| N(3)  | 5716.4 (13) | 8382 (3) | 6458.1 (18) | 67.7 (8)  |
| C(1)  | 7314.7 (16) | 2903 (4) | 6211 (2)    | 66.6 (9)  |
| C(2)  | 7783.0 (17) | 1941 (5) | 6158 (2)    | 73.8 (10) |
| C(3)  | 7700.5 (19) | 425 (5)  | 5830 (2)    | 79.7 (11) |
| C(4)  | 7167.1 (17) | -189 (4) | 5547 (2)    | 73.4 (10) |
| C(5)  | 6710.6 (17) | 739 (4)  | 5593 (2)    | 67.8 (9)  |
| C(6)  | 6777.5 (16) | 2296 (4) | 5925 (2)    | 63.6 (9)  |
| C(7)  | 7925.0 (16) | 5136 (5) | 6879 (3)    | 78.9 (10) |
| C(8)  | 6913.0 (15) | 5420 (4) | 6541 (2)    | 66.1 (9)  |
| C(9)  | 6370.5 (14) | 4636 (4) | 6269 (2)    | 62.5 (9)  |
| C(10) | 5860.8 (15) | 5606 (4) | 6364 (2)    | 64.4 (9)  |
| C(11) | 5811.7 (16) | 7251 (4) | 5888 (2)    | 65.8 (9)  |
| C(12) | 5810.1 (15) | 6066 (4) | 7271 (2)    | 64.3 (9)  |
| C(13) | 5726.5 (15) | 7721 (4) | 7285 (2)    | 65.1 (9)  |
| C(14) | 5659.7 (16) | 8529 (5) | 8022 (2)    | 71.5 (10) |
| C(15) | 5679.1 (16) | 7594 (5) | 8762 (2)    | 75.2 (10) |
| C(16) | 5752.9 (16) | 5958 (5) | 8758 (2)    | 71.6 (10) |
| C(17) | 5818.9 (15) | 5148 (4) | 8000 (2)    | 69.7 (9)  |
| C(18) | 5884 (2)    | 3357 (4) | 7996 (3)    | 85.2 (12) |
| O(3)  | 5247.5 (12) | 1293 (3) | 5866.4 (19) | 89.5 (9)  |

**Table 3 Anisotropic Displacement Parameters ( $\text{\AA}^2 \times 10^3$ ) for 240114LU\_LGPZ115096\_0m. The Anisotropic displacement factor exponent takes the form:  $-2\pi^2[h^2a^{*2}U_{11}+2hka^*b^*U_{12}+...]$ .**

| Atom  | $U_{11}$  | $U_{22}$  | $U_{33}$  | $U_{23}$   | $U_{13}$  | $U_{12}$  |
|-------|-----------|-----------|-----------|------------|-----------|-----------|
| F(1)  | 71.7 (14) | 68.2 (12) | 78.9 (13) | -5.8 (9)   | 6.0 (10)  | -0.6 (9)  |
| O(1)  | 85.1 (18) | 59.5 (14) | 77.5 (16) | -3.4 (11)  | 11.7 (13) | -4.2 (11) |
| O(2)  | 99 (2)    | 71.7 (16) | 62.6 (15) | 4.4 (11)   | 12.9 (13) | 5.9 (13)  |
| N(1)  | 67.8 (19) | 67.3 (17) | 62.0 (16) | -3.8 (12)  | 9.4 (13)  | -1.8 (13) |
| N(2)  | 71 (2)    | 59.9 (16) | 61.6 (16) | 2.2 (12)   | 9.8 (13)  | 3.2 (12)  |
| N(3)  | 80 (2)    | 56.5 (15) | 67.0 (17) | 0.6 (12)   | 13.8 (14) | 3.7 (13)  |
| C(1)  | 77 (3)    | 64.9 (19) | 57.7 (18) | 4.1 (14)   | 11.6 (16) | 3.0 (16)  |
| C(2)  | 71 (2)    | 78 (2)    | 72 (2)    | 0.5 (17)   | 9.2 (18)  | 5.7 (17)  |
| C(3)  | 84 (3)    | 78 (2)    | 76 (2)    | 1.9 (18)   | 13 (2)    | 18.2 (19) |
| C(4)  | 87 (3)    | 60.3 (19) | 73 (2)    | 3.2 (16)   | 14.6 (19) | 8.2 (17)  |
| C(5)  | 77 (2)    | 60.6 (19) | 65.4 (19) | 3.8 (14)   | 12.6 (17) | 0.0 (16)  |
| C(6)  | 70 (2)    | 62.9 (18) | 57.8 (17) | 4.5 (14)   | 11.3 (15) | 1.0 (15)  |
| C(7)  | 71 (3)    | 83 (2)    | 81 (2)    | -6.5 (19)  | 8.8 (18)  | -6.9 (18) |
| C(8)  | 73 (2)    | 65 (2)    | 60.2 (18) | -0.8 (15)  | 10.8 (16) | 0.9 (16)  |
| C(9)  | 71 (2)    | 58.4 (18) | 57.6 (17) | 2.8 (13)   | 11.2 (15) | 0.9 (15)  |
| C(10) | 65 (2)    | 62.6 (19) | 63.1 (18) | -2.0 (14)  | 6.0 (15)  | -5.0 (14) |
| C(11) | 72 (2)    | 64.7 (19) | 58.4 (19) | 1.0 (15)   | 4.3 (15)  | 2.0 (15)  |
| C(12) | 63 (2)    | 64.2 (19) | 64.7 (19) | 1.3 (15)   | 9.4 (15)  | -2.5 (15) |
| C(13) | 63 (2)    | 68 (2)    | 64.1 (19) | -3.5 (15)  | 8.9 (15)  | 0.6 (15)  |
| C(14) | 73 (2)    | 73 (2)    | 69 (2)    | -9.1 (16)  | 14.6 (17) | 0.0 (17)  |
| C(15) | 70 (3)    | 96 (3)    | 60 (2)    | -10.5 (19) | 12.8 (16) | -2.8 (19) |
| C(16) | 72 (2)    | 84 (2)    | 59.1 (19) | 1.5 (16)   | 12.0 (16) | -7.4 (17) |
| C(17) | 65 (2)    | 76 (2)    | 67 (2)    | 4.4 (16)   | 8.6 (16)  | -0.6 (16) |
| C(18) | 105 (3)   | 73 (2)    | 79 (2)    | 12.2 (18)  | 18 (2)    | -2 (2)    |
| O(3)  | 96 (2)    | 64.5 (15) | 102 (2)   | 12.2 (13)  | 3.6 (16)  | 2.0 (13)  |



**Table 4 Bond Lengths for 240114LU\_LGPZ115096\_0m.**

| Atom | Atom  | Length/Å | Atom  | Atom  | Length/Å |
|------|-------|----------|-------|-------|----------|
| F(1) | C(10) | 1.405(4) | C(4)  | C(5)  | 1.369(5) |
| O(1) | C(8)  | 1.237(4) | C(5)  | C(6)  | 1.403(5) |
| O(2) | C(11) | 1.210(4) | C(8)  | C(9)  | 1.470(5) |
| N(1) | C(1)  | 1.409(4) | C(9)  | C(10) | 1.513(5) |
| N(1) | C(7)  | 1.469(5) | C(10) | C(11) | 1.563(5) |
| N(1) | C(8)  | 1.371(5) | C(10) | C(12) | 1.507(5) |
| N(2) | C(6)  | 1.391(5) | C(12) | C(13) | 1.401(5) |
| N(2) | C(9)  | 1.292(4) | C(12) | C(17) | 1.379(5) |
| N(3) | C(11) | 1.353(4) | C(13) | C(14) | 1.379(5) |
| N(3) | C(13) | 1.412(4) | C(14) | C(15) | 1.399(5) |
| C(1) | C(2)  | 1.410(5) | C(15) | C(16) | 1.381(6) |
| C(1) | C(6)  | 1.402(5) | C(16) | C(17) | 1.408(5) |
| C(2) | C(3)  | 1.372(5) | C(17) | C(18) | 1.508(5) |
| C(3) | C(4)  | 1.395(6) |       |       |          |

**Table 5 Bond Angles for 240114LU\_LGPZ115096\_0m.**

| Atom  | Atom | Atom  | Angle/°  | Atom  | Atom  | Atom  | Angle/°  |
|-------|------|-------|----------|-------|-------|-------|----------|
| C(1)  | N(1) | C(7)  | 120.8(3) | F(1)  | C(10) | C(9)  | 107.6(3) |
| C(8)  | N(1) | C(1)  | 120.8(3) | F(1)  | C(10) | C(11) | 104.5(3) |
| C(8)  | N(1) | C(7)  | 118.4(3) | F(1)  | C(10) | C(12) | 110.7(3) |
| C(9)  | N(2) | C(6)  | 118.2(3) | C(9)  | C(10) | C(11) | 114.9(3) |
| C(11) | N(3) | C(13) | 111.2(3) | C(12) | C(10) | C(9)  | 115.9(3) |
| N(1)  | C(1) | C(2)  | 121.6(3) | C(12) | C(10) | C(11) | 102.6(3) |
| C(6)  | C(1) | N(1)  | 118.8(3) | O(2)  | C(11) | N(3)  | 126.7(3) |
| C(6)  | C(1) | C(2)  | 119.6(3) | O(2)  | C(11) | C(10) | 125.3(3) |
| C(3)  | C(2) | C(1)  | 118.9(4) | N(3)  | C(11) | C(10) | 107.7(3) |
| C(2)  | C(3) | C(4)  | 121.8(4) | C(13) | C(12) | C(10) | 107.7(3) |
| C(5)  | C(4) | C(3)  | 119.5(3) | C(17) | C(12) | C(10) | 131.0(3) |
| C(4)  | C(5) | C(6)  | 120.3(4) | C(17) | C(12) | C(13) | 121.3(3) |
| N(2)  | C(6) | C(1)  | 121.5(3) | C(12) | C(13) | N(3)  | 110.6(3) |
| N(2)  | C(6) | C(5)  | 118.7(3) | C(14) | C(13) | N(3)  | 126.9(3) |
| C(1)  | C(6) | C(5)  | 119.8(3) | C(14) | C(13) | C(12) | 122.5(3) |
| O(1)  | C(8) | N(1)  | 123.1(3) | C(13) | C(14) | C(15) | 115.9(4) |
| O(1)  | C(8) | C(9)  | 121.3(3) | C(16) | C(15) | C(14) | 122.4(3) |
| N(1)  | C(8) | C(9)  | 115.6(3) | C(15) | C(16) | C(17) | 121.1(3) |
| N(2)  | C(9) | C(8)  | 124.8(3) | C(12) | C(17) | C(16) | 116.9(3) |
| N(2)  | C(9) | C(10) | 118.9(3) | C(12) | C(17) | C(18) | 122.5(3) |
| C(8)  | C(9) | C(10) | 116.3(3) | C(16) | C(17) | C(18) | 120.7(3) |

**Table 6 Hydrogen Atom Coordinates (Å×10<sup>4</sup>) and Isotropic Displacement Parameters (Å<sup>2</sup>×10<sup>3</sup>) for 240114LU\_LGPZ115096\_0m.**

| Atom   | x       | y        | z       | U(eq) |
|--------|---------|----------|---------|-------|
| H(3)   | 5655.97 | 9397.35  | 6330.37 | 81    |
| H(2)   | 8149.7  | 2337.37  | 6347.19 | 89    |
| H(3A)  | 8015.36 | -225.33  | 5795.1  | 96    |
| H(4)   | 7121.04 | -1244.02 | 5323.86 | 88    |
| H(5)   | 6346.66 | 327.19   | 5400.04 | 81    |
| H(7A)  | 8149.3  | 5157.49  | 6420.53 | 118   |
| H(7B)  | 8110.95 | 4469.48  | 7355.34 | 118   |
| H(7C)  | 7884.01 | 6225.19  | 7087.49 | 118   |
| H(14)  | 5603.91 | 9651.68  | 8026.96 | 86    |
| H(15)  | 5640.01 | 8103.01  | 9286.98 | 90    |
| H(16)  | 5759.24 | 5370     | 9275.09 | 86    |
| H(18A) | 5581.23 | 2887.66  | 7578.94 | 128   |
| H(18B) | 5870.69 | 2935.42  | 8571.94 | 128   |
| H(18C) | 6243.4  | 3082.73  | 7834.87 | 128   |
| H(3B)  | 4991.05 | 1740.07  | 5486.37 | 134   |
| H(3C)  | 5531.35 | 1936.97  | 5909.07 | 134   |

## 6. Characterization of products

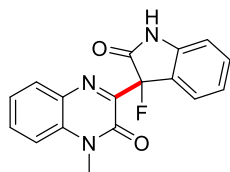

**3-Fluoro-3-(1-methylquinoxalin-2-one) indolin-2-one (3a)** was purified by silica column with dichloromethane/methanol = 50:1-20:1, yellow solid, 61.3 mg, 99% yield;

**<sup>1</sup>H NMR (300 MHz, DMSO-*d*<sub>6</sub>):**  $\delta$  = 10.95 (s, 1H, NH), 8.04 (dd,  $J$  = 1.50, 8.02 Hz, 1H, ArH), 7.75 (ddd,  $J$  = 1.52, 7.16, 8.6 Hz, 1H, ArH), 7.64 (dd,  $J$  = 1.26, 8.54 Hz, 1H, ArH), 7.50 (ddd,  $J$  = 1.24, 7.16, 8.20 Hz, 1H, ArH), 7.35-7.40 (m, 1H, ArH), 7.19 (d,  $J$  = 7.44 Hz, 1H, ArH), 6.92-6.98 (m, 2H, ArH), 3.56 (s, 3H, NCH<sub>3</sub>);

**<sup>13</sup>C NMR (75 MHz, DMSO-*d*<sub>6</sub>):**  $\delta$  = 171.35-171.54 (d,  $J_{C-F}$  = 19.53 Hz), 152.09-152.26 (d,  $J_{C-F}$  = 16.90 Hz), 152.03-152.05 (d,  $J_{C-F}$  = 2.01 Hz), 145.10-145.16 (d,  $J_{C-F}$  = 5.60 Hz), 133.60, 132.46-132.49 (d,  $J_{C-F}$  = 3.67 Hz), 132.13, 132.08, 130.36, 125.24-125.26 (d,  $J_{C-F}$  = 1.68 Hz), 124.87-125.05 (d,  $J_{C-F}$  = 17.80 Hz), 124.66, 122.57-122.60 (d,  $J_{C-F}$  = 3.28 Hz), 115.64, 111.04-111.06 (d,  $J_{C-F}$  = 2.07 Hz), 91.78-93.66 (d,  $J_{C-F}$  = 188.05 Hz), 29.32;

**<sup>19</sup>F NMR (376 MHz, DMSO-*d*<sub>6</sub>):**  $\delta$  = -159.99;

**HRMS (ESI-TOF)** calcd for C<sub>17</sub>H<sub>13</sub>N<sub>3</sub>O<sub>2</sub>F [M + H]<sup>+</sup>: 310.0986; found: 310.0966.

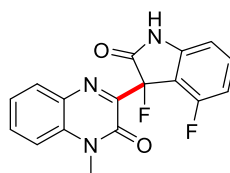

**3, 4-Difluoro-3-(1-methylquinoxalin-2-one) indolin-2-one (3b)** was purified by silica column with dichloromethane/methanol = 50:0-20:1, yellow solid, 39.9 mg, 61% yield;

**<sup>1</sup>H NMR (400 MHz, DMSO-*d*<sub>6</sub>):**  $\delta$  = 11.24 (s, 1H, NH), 8.06 (dd,  $J$  = 1.50, 7.96 Hz, 1H, ArH), 7.77 (ddd,  $J$  = 1.58, 7.22, 8.60 Hz, 1H, ArH), 7.67 (dd,  $J$  = 1.22, 8.58 Hz, 1H, ArH), 7.52 (ddd,  $J$  = 1.22, 7.24, 8.24 Hz, 1H, ArH), 7.41-7.47 (m, 1H, ArH), 6.85 (d,  $J$  = 7.96 Hz, 1H, ArH), 6.78 (t,  $J$  = 8.98 Hz, 1H, ArH), 3.59 (s, 3H, NCH<sub>3</sub>);

**<sup>13</sup>C NMR (100 MHz, DMSO-*d*<sub>6</sub>):**  $\delta$  = 170.63-170.82 (d,  $J_{C-F}$  = 19.34 Hz), 157.83-160.34 (d,  $J_{C-F}$  = 250.82 Hz), 152.05 (d,  $J_{C-F}$  = 3.86 Hz), 150.93-151.15 (d,  $J_{C-F}$  = 22.08 Hz), 147.06 (dd,  $J_{C-F}$  = 5.11, 7.26 Hz), 135.07 (d,  $J_{C-F}$  = 3.30 Hz), 134.97 (d,  $J_{C-F}$  = 3.28 Hz), 133.52, 132.37, 132.06, 130.43, 124.85, 115.80, 109.90-110.09 (d,  $J_{C-F}$  = 19.48 Hz), 107.69, 92.28-94.41 (d,  $J_{C-F}$  = 213.27 Hz), 29.41;

**<sup>19</sup>F NMR (376 MHz, DMSO-*d*<sub>6</sub>):**  $\delta$  = -117.74 (d,  $J_{C-F}$  = 4.77 Hz), -163.38 (d,  $J_{C-F}$  = 3.53 Hz);

**HRMS (ESI-TOF)** calcd for C<sub>17</sub>H<sub>12</sub>N<sub>3</sub>O<sub>2</sub>F<sub>2</sub> [M + H]<sup>+</sup>: 328.0892; found: 328.0869.

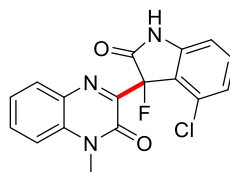

**3-Fluoro-4-chloro-3-(1-methylquinoxalin-2-one) indolin-2-one (3c)** was purified by silica column with dichloromethane/methanol = 50:0-20:1, light yellow, 37.5 mg, 55% yield;

**<sup>1</sup>H NMR (400 MHz, DMSO-*d*<sub>6</sub>):**  $\delta$  = 11.26 (s, 1H, NH), 8.07 (dd,  $J$  = 1.48, 8.00 Hz, 1H, ArH), 7.77 (ddd,  $J$  = 1.54, 7.22, 8.62 Hz, 1H, ArH), 7.67 (dd,  $J$  = 1.30, 8.54 Hz, 1H, ArH), 7.52 (ddd,  $J$  = 1.28, 7.22, 8.28 Hz, 1H, ArH), 7.41 (dt,  $J$  = 2.20, 8.08 Hz, 1H, ArH), 6.95-7.00 (m, 2H, ArH), 3.60 (s, 3H, NCH<sub>3</sub>);

**<sup>13</sup>C NMR (100 MHz, DMSO-*d*<sub>6</sub>):**  $\delta$  = 170.33-170.52 (d,  $J_{C-F}$  = 19.10 Hz), 151.97-152.01 (d,  $J_{C-F}$  = 3.87 Hz), 150.89-151.11 (d,  $J_{C-F}$  = 21.60 Hz), 146.92-146.97 (d,  $J_{C-F}$  = 5.06 Hz), 134.05-134.08 (d,  $J_{C-F}$  = 3.46 Hz), 133.45, 132.32, 132.12, 130.78-130.81 (d,  $J_{C-F}$  = 2.34 Hz), 130.48, 124.84, 123.19-123.22 (d,  $J_{C-F}$  = 2.82 Hz), 122.22-122.39 (d,  $J_{C-F}$  = 16.73 Hz), 115.77, 110.13, 91.68-93.58 (d,  $J_{C-F}$  = 190.55 Hz), 29.37;

**<sup>19</sup>F NMR (376 MHz, DMSO-*d*<sub>6</sub>):**  $\delta$  = -166.56;

**HRMS (ESI-TOF)** calcd for C<sub>17</sub>H<sub>12</sub>N<sub>3</sub>O<sub>2</sub>ClF [M + H]<sup>+</sup>: 344.0597; found: 344.0581.

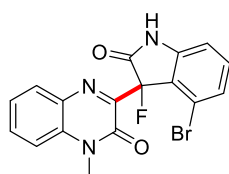

**3-Fluoro-4-bromo-3-(1-methylquinoxalin-2-one) indolin-2-one (3d)** was purified by silica column with dichloromethane/methanol = 50:0-20:1, yellow solid, 49.1 mg, 65% yield;

**<sup>1</sup>H NMR (400 MHz, DMSO-*d*<sub>6</sub>):**  $\delta$  = 11.24 (s, 1H, NH), 8.08 (dd,  $J$  = 1.48, 8.04 Hz, 1H, ArH), 7.28 (t,  $J$  = 7.82 Hz, 1H, ArH), 7.69 (d,  $J$  = 8.44 Hz, 1H, ArH), 7.53 (t,  $J$  = 7.56 Hz, 1H, ArH), 7.33 (dt,  $J$  = 2.16, 7.99 Hz, 1H, ArH), 7.14 (d,  $J$  = 8.16 Hz, 1H, ArH), 7.00 (d,  $J$  = 7.72 Hz, 1H, ArH), 3.60 (s, 3H, NCH<sub>3</sub>);

**<sup>13</sup>C NMR (100 MHz, DMSO-*d*<sub>6</sub>):**  $\delta$  = 170.22-170.41 (d,  $J_{C-F}$  = 19.20 Hz), 151.93-151.97 (d,  $J_{C-F}$  = 3.99 Hz), 150.92-151.14 (d,  $J_{C-F}$  = 21.35 Hz), 147.00-147.05 (d,  $J_{C-F}$  = 5.04 Hz), 134.12-134.15 (d,  $J_{C-F}$  = 3.40 Hz), 133.45, 132.32, 132.14, 130.52, 126.26-126.29 (d,  $J_{C-F}$  = 2.83 Hz), 124.86, 124.26-124.43 (d,  $J_{C-F}$  = 16.47 Hz), 119.09-119.11 (d,  $J_{C-F}$  = 2.44 Hz), 115.77, 110.53, 92.39-94.30 (d,  $J_{C-F}$  = 190.94 Hz), 29.36;

**HRMS (ESI-TOF)** calcd for C<sub>17</sub>H<sub>12</sub>N<sub>3</sub>O<sub>2</sub>BrF [M + H]<sup>+</sup>: 388.0091; found: 388.0078.

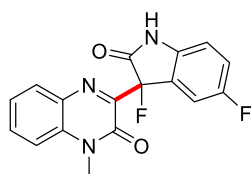

**3, 5-Difluoro-3-(1-methylquinoxalin-2-one) indolin-2-one (3e)** was purified by silica column with dichloromethane/methanol = 50:0-20:1, brown solid, 51.2 mg, 78% yield;

**<sup>1</sup>H NMR (400 MHz, DMSO-*d*<sub>6</sub>):**  $\delta$  = 10.99 (s, 1H, NH), 8.04 (dd,  $J$  = 1.50, 8.02 Hz, 1H, ArH), 7.76 (ddd,  $J$  = 1.56, 7.20, 8.60 Hz, 1H, ArH), 7.66 (dd,  $J$  = 1.26, 8.50 Hz, 1H, ArH), 7.51 (ddd,  $J$  = 1.24, 7.22, 8.26 Hz, 1H, ArH), 7.20-7.25 (m, 1H, ArH), 7.15 (td,  $J$  = 2.51, 7.81 Hz, 1H, ArH), 6.98 (ddd,  $J$  = 1.29, 4.27, 5.52 Hz, 1H, ArH), 3.57 (s, 3H, NCH<sub>3</sub>);

**<sup>13</sup>C NMR (100 MHz, DMSO-*d*<sub>6</sub>):**  $\delta$  = 171.24-171.43 (d,  $J_{C-F}$  = 19.25 Hz), 157.10-159.51 (d,  $J_{C-F}$  = 240.59 Hz), 152.13-152.16 (d,  $J_{C-F}$  = 3.53 Hz), 151.44-151.66 (d,  $J_{C-F}$  = 21.96 Hz), 141.32-141.36 (d,  $J_{C-F}$  = 4.07 Hz), 133.71, 132.15, 132.19, 130.44, 124.64, 118.81-118.85 (d,  $J_{C-F}$  = 3.57 Hz),

118.58-118.61 (d,  $J_{C-F}$  = 2.78 Hz), 115.64, 113.43-113.18 (d,  $J_{C-F}$  = 24.87 Hz), 111.93-112.01 (d,  $J_{C-F}$  = 7.66 Hz), 91.74-93.63 (d,  $J_{C-F}$  = 188.43 Hz), 29.34;

**$^{19}\text{F}$  NMR (376 MHz, DMSO- $d_6$ ):**  $\delta$  = -120.98, -160.88;

**HRMS (ESI-TOF)** calcd for  $\text{C}_{17}\text{H}_{12}\text{F}_2\text{N}_3\text{O}_2$   $[\text{M} + \text{H}]^+$ : 328.0892; found: 328.0871.

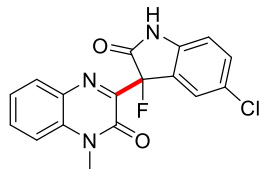

**3-Fluoro-5-chloro-3-(1-methylquinoxalin-2-one) indolin-2-one (3f)** was purified by silica column with dichloromethane/methanol = 50:0-20:1, brown solid, 36 mg, 52% yield;

**$^1\text{H}$  NMR (400 MHz, DMSO- $d_6$ ):**  $\delta$  = 11.11 (s, 1H, NH), 8.03 (dd,  $J$  = 1.46, 8.06 Hz, 1H, ArH), 7.75 (ddd,  $J$  = 1.58, 7.22, 8.62 Hz, 1H, ArH), 7.65 (dd,  $J$  = 1.26, 8.54 Hz, 1H, ArH), 7.51 (ddd,  $J$  = 1.24, 7.20, 8.24 Hz, 1H, ArH), 7.44 (td,  $J$  = 2.19, 8.32 Hz, 1H, ArH), 7.29 (t,  $J$  = 2.32 Hz, 1H, ArH), 7.00 (dd,  $J$  = 1.26, 8.30 Hz, 1H, ArH), 3.57 (s, 3H, NCH<sub>3</sub>);

**$^{13}\text{C}$  NMR (100 MHz, DMSO- $d_6$ ):**  $\delta$  = 171.01-171.20 (d,  $J_{C-F}$  = 19.28 Hz), 152.17-152.21 (d,  $J_{C-F}$  = 3.42 Hz), 151.32-151.54 (d,  $J_{C-F}$  = 22.06 Hz), 146.92-146.97 (d,  $J_{C-F}$  = 5.44 Hz), 133.73, 132.21, 132.18, 130.43, 126.81, 126.64, 126.48-126.52 (d,  $J_{C-F}$  = 3.65 Hz), 125.51, 124.63, 115.63, 112.54, 91.49-93.38 (d,  $J_{C-F}$  = 189.02 Hz), 29.36;

**$^{19}\text{F}$  NMR (376 MHz, DMSO- $d_6$ ):**  $\delta$  = -160.86;

**HRMS (ESI-TOF)** calcd for  $\text{C}_{17}\text{H}_{12}\text{N}_3\text{O}_2\text{ClF}$   $[\text{M} + \text{H}]^+$ : 344.0597; found: 344.0583.

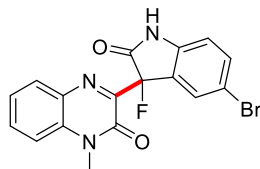

**3-Fluoro-5-bromo-3-(1-methylquinoxalin-2-one) indolin-2-one (3g)** was purified by silica column with dichloromethane/methanol = 50:0-20:1, Brownish yellow solid, 60.1 mg, 79% yield;

**$^1\text{H}$  NMR (400 MHz, DMSO- $d_6$ ):**  $\delta$  = 11.12 (s, 1H, NH), 8.04 (dd,  $J$  = 1.48, 8.00 Hz, 1H, ArH), 7.75 (ddd,  $J$  = 1.56, 7.22, 8.62 Hz, 1H, ArH), 7.65 (dd,  $J$  = 1.28, 8.64 Hz, 1H, ArH), 7.58 (td,  $J$  = 2.14, 8.32 Hz, 1H, ArH), 7.51 (ddd,  $J$  = 1.26, 7.20, 8.24 Hz, 1H, ArH), 7.39 (t,  $J$  = 2.26 Hz, 1H, ArH), 6.96 (dd,  $J$  = 1.28, 8.32 Hz, 1H, ArH), 3.57 (s, 3H, NCH<sub>3</sub>);

**$^{13}\text{C}$  NMR (100 MHz, DMSO- $d_6$ ):**  $\delta$  = 170.90-171.09 (d,  $J_{C-F}$  = 19.33 Hz), 152.18-152.22 (d,  $J_{C-F}$  = 3.53 Hz), 151.32-151.53 (d,  $J_{C-F}$  = 21.92 Hz), 144.35-144.40 (d,  $J_{C-F}$  = 5.34 Hz), 135.07-135.11 (d,  $J_{C-F}$  = 3.62 Hz), 133.75, 132.23, 132.18, 130.43, 128.16, 127.01-27.19 (d,  $J_{C-F}$  = 17.61 Hz), 124.63, 115.64, 114.01-114.05 (d,  $J_{C-F}$  = 3.61 Hz), 113.03-113.04 (d,  $J_{C-F}$  = 1.81 Hz), 91.43-93.32 (d,  $J_{C-F}$  = 189.21 Hz), 29.37;

**$^{19}\text{F}$  NMR (376 MHz, DMSO- $d_6$ ):**  $\delta$  = -160.71;

**HRMS (ESI-TOF)** calcd for  $\text{C}_{17}\text{H}_{12}\text{N}_3\text{O}_2\text{BrF}$   $[\text{M} + \text{H}]^+$ : 388.0091; found: 388.0091.

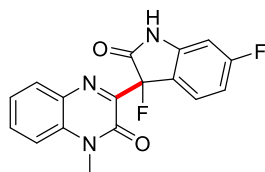

**3, 5-Difluoro-3-(1-methylquinoxalin-2-one) indolin-2-one (3h)** was purified by silica column with dichloromethane/methanol = 50:0-20:1, yellow solid, 28.4 mg, 41% yield;

**<sup>1</sup>H NMR (400 MHz, DMSO-*d*<sub>6</sub>):**  $\delta$  = 11.14 (s, 1H, NH), 8.04 (dd,  $J$  = 1.46, 8.06 Hz, 1H, ArH), 7.75 (ddd,  $J$  = 1.58, 7.20, 8.62 Hz, 1H, ArH), 7.65 (dd,  $J$  = 1.26, 8.54 Hz, 1H, ArH), 7.51 (ddd,  $J$  = 1.22, 7.20, 8.24 Hz, 1H, ArH), 7.22-7.26 (m, 1H, ArH), 6.79-6.83 (m, 1H, ArH), 6.71-6.77 (m, 1H, ArH), 3.57 (s, 3H, NCH<sub>3</sub>);

**<sup>13</sup>C NMR (100 MHz, DMSO-*d*<sub>6</sub>):**  $\delta$  = 171.57-171.77 (d,  $J_{C-F}$  = 19.56 Hz), 163.63-166.08 (d,  $J_{C-F}$  = 245.23 Hz), 152.08-152.12 (d,  $J_{C-F}$  = 3.49 Hz), 151.68-151.91 (d,  $J_{C-F}$  = 22.60 Hz), 147.04-147.23 (dd,  $J_{C-F}$  = 5.56, 12.90 Hz), 133.62, 132.19, 132.10, 130.39, 127.23-127.33 (d,  $J_{C-F}$  = 10.58 Hz), 124.69, 120.89-121.06 (d,  $J_{C-F}$  = 17.24 Hz), 115.67, 108.67-108.92 (dd,  $J_{C-F}$  = 3.25, 22.15 Hz), 99.32-99.60 (d,  $J_{C-F}$  = 27.11 Hz), 91.10-92.99 (d,  $J_{C-F}$  = 188.70 Hz), 29.36;

**<sup>19</sup>F NMR (376 MHz, DMSO-*d*<sub>6</sub>):**  $\delta$  = -107.02 (d,  $J_{C-F}$  = 6.99 Hz), -159.31 (d,  $J_{C-F}$  = 7.06 Hz);

**HRMS (ESI-TOF)** calcd for C<sub>17</sub>H<sub>12</sub>F<sub>2</sub>N<sub>3</sub>O<sub>2</sub> [M + H]<sup>+</sup>: 328.0892; found: 328.0871.

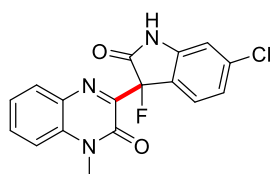

**3-Fluoro-6-chloro-3-(1-methylquinoxalin-2-one) indolin-2-one (3i)** was purified by silica column with dichloromethane/methanol = 50:0-20:1, light brown solid, 49.8 mg, 70% yield;

**<sup>1</sup>H NMR (400 MHz, DMSO-*d*<sub>6</sub>):**  $\delta$  = 11.16 (s, 1H, NH), 8.04 (dd,  $J$  = 1.50, 7.98 Hz, 1H, ArH), 7.75 (ddd,  $J$  = 1.54, 7.18, 8.60 Hz, 1H, ArH), 7.65 (dd,  $J$  = 1.22, 8.58 Hz, 1H, ArH), 7.51 (ddd,  $J$  = 1.24, 7.16, 8.24 Hz, 1H, ArH), 7.21-7.23 (m, 1H, ArH), 6.98-7.01 (m, 2H, ArH), 3.57 (s, 3H, NCH<sub>3</sub>);

**<sup>13</sup>C NMR (100 MHz, DMSO-*d*<sub>6</sub>):**  $\delta$  = 171.24-171.43 (d,  $J_{C-F}$  = 19.42 Hz), 152.10-152.13 (d,  $J_{C-F}$  = 3.51 Hz), 151.49-151.71 (d,  $J_{C-F}$  = 22.25 Hz), 146.57-146.62 (d,  $J_{C-F}$  = 5.42 Hz), 136.78-136.83 (d,  $J_{C-F}$  = 4.11 Hz), 133.63, 132.24, 132.13, 130.40, 126.86, 124.72, 123.65-123.83 (d,  $J_{C-F}$  = 18.25 Hz), 122.37-122.40 (d,  $J_{C-F}$  = 3.13 Hz), 115.68, 111.20, 91.11-93.00 (d,  $J_{C-F}$  = 188.92 Hz), 29.37;

**<sup>19</sup>F NMR (376 MHz, DMSO-*d*<sub>6</sub>):**  $\delta$  = -160.52;

**HRMS (ESI-TOF)** calcd for C<sub>17</sub>H<sub>12</sub>N<sub>3</sub>O<sub>2</sub>ClF [M + H]<sup>+</sup>: 344.0597; found: 344.0573.

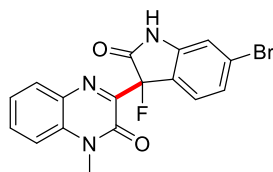

**3-Fluoro-6-bromo-3-(1-methylquinoxalin-2-one) indolin-2-one (3j)** was purified by silica column with dichloromethane/methanol = 50:0-20:1, light yellow solid, 60.5 mg, 75% yield;

**<sup>1</sup>H NMR (400 MHz, DMSO-*d*<sub>6</sub>):**  $\delta$  = 11.15 (s, 1H, NH), 8.04 (dd,  $J$  = 1.52, 8.04 Hz, 1H, ArH),

7.76 (ddd,  $J = 1.54, 7.22, 8.62$  Hz, 1H, ArH), 7.65 (dd,  $J = 1.28, 8.56$  Hz, 1H, ArH), 7.51 (ddd,  $J = 1.22, 7.18, 8.24$  Hz, 1H, ArH), 7.13-7.15 (m, 3H, ArH), 3.57 (s, 3H, NCH<sub>3</sub>);

**<sup>13</sup>C NMR (100 MHz, DMSO-*d*<sub>6</sub>):**  $\delta = 171.12$ -171.32 (d,  $J_{C-F} = 19.50$  Hz), 152.10-152.13 (d,  $J_{C-F} = 3.54$  Hz), 151.45-151.68 (d,  $J_{C-F} = 22.33$  Hz), 146.64-146.69 (d,  $J_{C-F} = 5.49$  Hz), 133.63, 132.25, 132.13, 130.40, 127.13, 125.38, 125.30-125.33 (d,  $J_{C-F} = 3.05$  Hz), 124.72, 124.06-124.24 (d,  $J_{C-F} = 17.94$  Hz), 115.69, 113.95, 91.18-93.07 (d,  $J_{C-F} = 189.11$  Hz), 29.37;

**<sup>19</sup>F NMR (376 MHz, DMSO-*d*<sub>6</sub>):**  $\delta = -160.83$ ;

**HRMS (ESI-TOF)** calcd for C<sub>17</sub>H<sub>12</sub>N<sub>3</sub>O<sub>2</sub>BrF [M + H]<sup>+</sup>: 388.0091; found: 388.0092.

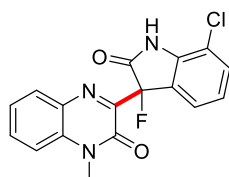

**3-Fluoro-7-chloro-3-(1-methylquinoxalin-2-one) indolin-2-one (3k)** was purified by silica column with dichloromethane/methanol = 50:0-20:1, light yellow solid, 62.9 mg, 90% yield;

**<sup>1</sup>H NMR (400 MHz, DMSO-*d*<sub>6</sub>):**  $\delta = 11.46$  (s, 1H, NH), 8.05 (dd,  $J = 1.50, 7.98$  Hz, 1H, ArH), 7.76 (ddd,  $J = 1.54, 7.18, 8.62$  Hz, 1H, ArH), 7.66 (dd,  $J = 1.12, 8.44$  Hz, 1H, ArH), 7.52 (ddd,  $J = 1.26, 7.22, 8.26$  Hz, 1H, ArH), 7.45-7.48 (m, 1H, ArH), 7.17-7.20 (m, 1H, ArH), 6.98 (ddd,  $J = 1.04, 7.38, 8.34$  Hz, 1H, ArH), 3.58 (s, 3H, NCH<sub>3</sub>);

**<sup>13</sup>C NMR (100 MHz, DMSO-*d*<sub>6</sub>):**  $\delta = 171.17$ -171.36 (d,  $J_{C-F} = 19.09$  Hz), 152.11-152.15 (d,  $J_{C-F} = 3.46$  Hz), 151.40-151.63 (d,  $J_{C-F} = 22.15$  Hz), 142.79-142.84 (d,  $J_{C-F} = 5.47$  Hz), 133.62, 132.44, 132.47, 132.30, 132.14, 130.44, 126.45-126.63 (d,  $J_{C-F} = 17.98$  Hz), 124.76, 123.98-124.01 (d,  $J_{C-F} = 3.05$  Hz), 115.72, 115.16-115.18 (d,  $J_{C-F} = 1.94$  Hz), 91.83-93.72 (d,  $J_{C-F} = 189.21$  Hz), 29.39;

**<sup>19</sup>F NMR (376 MHz, DMSO-*d*<sub>6</sub>):**  $\delta = -160.02$ ;

**HRMS (ESI-TOF)** calcd for C<sub>17</sub>H<sub>12</sub>N<sub>3</sub>O<sub>2</sub>ClF [M + H]<sup>+</sup>: 344.0597; found: 344.0574.

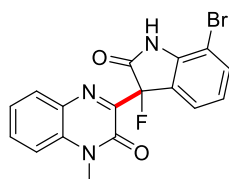

**3-Fluoro-7-bromo-3-(1-methylquinoxalin-2-one) indolin-2-one (3l)** was purified by silica column with dichloromethane/methanol = 50:0-20:1, red solid, 52.0 mg, 66% yield;

**<sup>1</sup>H NMR (400 MHz, DMSO-*d*<sub>6</sub>):**  $\delta = 11.30$  (s, 1H, NH), 8.05 (dd,  $J = 1.54, 8.02$  Hz, 1H, ArH), 7.77 (ddd,  $J = 1.56, 7.22, 8.62$  Hz, 1H, ArH), 7.64-7.67 (m, 1H, ArH), 7.60 (d,  $J = 8.32$  Hz, 1H, ArH), 7.52 (t,  $J = 7.64$  Hz, 1H, ArH), 7.21 (dd,  $J = 2.22, 7.02$  Hz, 1H, ArH), 6.91 (t,  $J = 7.76$  Hz, 1H, ArH), 3.58 (s, 3H, NCH<sub>3</sub>);

**<sup>13</sup>C NMR (100 MHz, DMSO-*d*<sub>6</sub>):**  $\delta = 171.08$ -171.27 (d,  $J_{C-F} = 19.22$  Hz), 152.11-152.14 (d,  $J_{C-F} = 3.62$  Hz), 151.46-151.68 (d,  $J_{C-F} = 21.91$  Hz), 144.50-144.55 (d,  $J_{C-F} = 5.43$  Hz), 135.34-135.38 (d,  $J_{C-F} = 3.72$  Hz), 133.62, 132.30, 132.15, 130.44, 126.39-126.57 (d,  $J_{C-F} = 17.96$  Hz), 124.77, 124.43, 124.32-124.36 (d,  $J_{C-F} = 3.11$  Hz), 115.72, 103.21-103.23 (d,  $J_{C-F} = 1.99$  Hz), 92.07-93.96 (d,  $J_{C-F} = 189.21$  Hz), 29.39;

**<sup>19</sup>F NMR (376 MHz, DMSO-*d*<sub>6</sub>):**  $\delta = -159.68$ ;

**HRMS (ESI-TOF)** calcd for  $C_{17}H_{12}N_3O_2BrF$   $[M + H]^+$ : 388.0091; found: 388.0089.

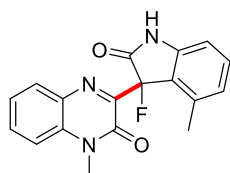

**3-Fluoro-4-methyl-3-(1-methylquinoxalin-2-one) indolin-2-one (3m)** was purified by silica column with dichloromethane/methanol = 50:0-20:1, light yellow solid, 42.8 mg, 67% yield;

**$^1H$  NMR (400 MHz, DMSO- $d_6$ ):**  $\delta$  = 10.96 (s, 1H, NH), 8.04 (dd,  $J$  = 1.52, 8.00 Hz, 1H, ArH), 7.75 (ddd,  $J$  = 1.57, 7.16, 8.62 Hz, 1H, ArH), 7.66 (dd,  $J$  = 1.26, 8.58 Hz, 1H, ArH), 7.50 (ddd,  $J$  = 1.24, 7.20, 8.20 Hz, 1H, ArH), 7.24 (dt,  $J$  = 2.29, 7.76 Hz, 1H, ArH), 6.79 (d,  $J$  = 7.76 Hz, 1H, ArH), 6.74 (d,  $J$  = 7.80 Hz, 1H, ArH), 3.57 (s, 3H, NCH<sub>3</sub>), 1.98 (d,  $J$  = 2.32 Hz, 3H, CH<sub>3</sub>);

**$^{13}C$  NMR (100 MHz, DMSO- $d_6$ ):**  $\delta$  = 171.16-171.35 (d,  $J_{C-F}$  = 18.93 Hz), 152.36-152.58 (d,  $J_{C-F}$  = 21.80 Hz), 151.96-152.00 (d,  $J_{C-F}$  = 3.87 Hz), 145.23-145.29 (d,  $J_{C-F}$  = 5.81 Hz), 136.69-136.70 (d,  $J_{C-F}$  = 1.77 Hz), 133.57, 132.15, 132.00-132.03 (d,  $J_{C-F}$  = 14.00 Hz), 131.94, 130.30, 124.66, 124.54-124.57 (d,  $J_{C-F}$  = 11.72 Hz), 122.75-122.92 (d,  $J_{C-F}$  = 16.94 Hz), 115.69, 108.58, 92.57-94.46 (d,  $J_{C-F}$  = 188.62 Hz), 29.35, 17.41;

**$^{19}F$  NMR (376 MHz, DMSO- $d_6$ ):**  $\delta$  = -165.69;

**HRMS (ESI-TOF)** calcd for  $C_{18}H_{15}N_3O_2F$   $[M + H]^+$ : 324.1143; found: 324.1121.

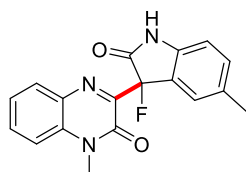

**3-Fluoro-5-methyl-3-(1-methylquinoxalin-2-one) indolin-2-one (3n)** was purified by silica column with dichloromethane/methanol = 50:0-20:1, light brown solid, 58.9 mg, 90% yield;

**$^1H$  NMR (400 MHz, DMSO- $d_6$ ):**  $\delta$  = 10.86 (s, 1H, NH), 8.04 (dd,  $J$  = 1.52, 8.04 Hz, 1H, ArH), 7.75 (ddd,  $J$  = 1.56, 7.22, 8.60 Hz, 1H, ArH), 7.64 (dd,  $J$  = 1.26, 8.54 Hz, 1H, ArH), 7.51 (ddd,  $J$  = 1.22, 7.16, 8.22 Hz, 1H, ArH), 7.15-7.18 (m, 1H, ArH), 6.99-7.00 (m, 1H, ArH), 6.87 (dd,  $J$  = 1.22, 7.89 Hz, 1H, ArH), 3.57 (s, 3H, NCH<sub>3</sub>), 2.17 (s, 3H, CH<sub>3</sub>);

**$^{13}C$  NMR (100 MHz, DMSO- $d_6$ ):**  $\delta$  = 171.35-171.54 (d,  $J_{C-F}$  = 19.90 Hz), 152.16-152.38 (d,  $J_{C-F}$  = 22.21 Hz), 152.03-152.07 (d,  $J_{C-F}$  = 3.62 Hz), 142.64-142.69 (d,  $J_{C-F}$  = 5.66 Hz), 133.62, 132.57-132.61 (d,  $J_{C-F}$  = 3.74 Hz), 132.09, 131.65-131.68 (d,  $J_{C-F}$  = 3.33 Hz), 130.34, 125.75, 125.10, 124.92, 124.64, 115.64, 110.79-110.82 (d,  $J_{C-F}$  = 2.04 Hz), 91.95-93.83 (d,  $J_{C-F}$  = 187.89 Hz), 29.32, 20.77;

**$^{19}F$  NMR (376 MHz, DMSO- $d_6$ ):**  $\delta$  = -159.70;

**HRMS (ESI-TOF)** calcd for  $C_{18}H_{15}N_3O_2F$   $[M + H]^+$ : 324.1143; found: 324.1122.

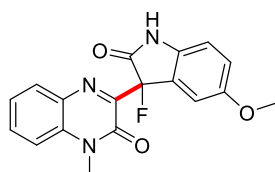

**3-Fluoro-5-methoxy-3-(1-methylquinoxalin-2-one) indolin-2-one (3o)** was purified by silica column with dichloromethane/methanol = 50:0-20:1, brown solid, 66.6 mg, 99% yield;

**<sup>1</sup>H NMR (400 MHz, DMSO-*d*<sub>6</sub>):**  $\delta$  = 10.76 (s, 1H, NH), 8.04 (dd,  $J$  = 1.48, 8.08 Hz, 1H, ArH), 7.75 (ddd,  $J$  = 1.58, 7.22, 8.62 Hz, 1H, ArH), 7.65 (dd,  $J$  = 1.26, 8.50 Hz, 1H, ArH), 7.50 (ddd,  $J$  = 1.26, 7.16, 8.24 Hz, 1H, ArH), 6.94 (dt,  $J$  = 2.40, 8.52 Hz, 1H, ArH), 6.80 (t,  $J$  = 2.44 Hz, 1H, ArH), 3.64 (s, 3H, CH<sub>3</sub>), 3.57 (s, 3H, NCH<sub>3</sub>);

**<sup>13</sup>C NMR (100 MHz, DMSO-*d*<sub>6</sub>):**  $\delta$  = 171.25-171.44 (d,  $J_{C-F}$  = 19.33 Hz), 155.41-155.44 (d,  $J_{C-F}$  = 3.35 Hz), 151.98-152.20 (d,  $J_{C-F}$  = 21.98 Hz), 152.07-152.11 (d,  $J_{C-F}$  = 3.53 Hz), 138.20-138.26 (d,  $J_{C-F}$  = 5.79 Hz), 133.69, 132.15, 132.07, 130.39, 126.07, 125.90, 124.59, 117.26-117.30 (d,  $J_{C-F}$  = 3.95 Hz), 115.60, 111.61-111.74 (d,  $J_{C-F}$  = 12.20 Hz), 92.21-94.09 (d,  $J_{C-F}$  = 188.20 Hz), 55.99, 29.30;

**<sup>19</sup>F NMR (376 MHz, DMSO-*d*<sub>6</sub>):**  $\delta$  = -159.92;

**HRMS (ESI-TOF)** calcd for C<sub>18</sub>H<sub>15</sub>N<sub>3</sub>O<sub>3</sub>F [M + H]<sup>+</sup>: 340.1092; found: 340.1072.

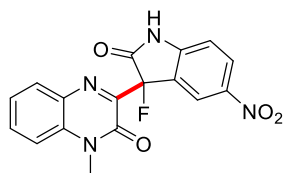

**3-Fluoro-5-nitro-3-(1-methylquinoxalin-2-one) indolin-2-one (3p)** was purified by silica column with dichloromethane/methanol = 50:0-20:1, brick red solid, 25 mg, 36% yield;

**<sup>1</sup>H NMR (400 MHz, DMSO-*d*<sub>6</sub>):**  $\delta$  = 11.91 (s, 1H, NH), 8.03 (dt,  $J$  = 8.71, 2.11 Hz, 1H, ArH), 8.04-8.07 (m, 2H, ArH), 7.77 (ddd,  $J$  = 1.56, 7.20, 8.62 Hz, 1H, ArH), 7.67 (dd,  $J$  = 1.26, 8.54 Hz, 1H, ArH), 7.52 (ddd,  $J$  = 1.24, 7.22, 8.24 Hz, 1H, ArH), 7.24 (dd,  $J$  = 1.16, 8.72 Hz, 1H, ArH), 3.56 (s, 3H, NCH<sub>3</sub>);

**<sup>13</sup>C NMR (100 MHz, DMSO-*d*<sub>6</sub>):**  $\delta$  = 171.47-171.67 (d,  $J_{C-F}$  = 19.36 Hz), 152.32-152.35 (d,  $J_{C-F}$  = 3.33 Hz), 151.27-151.32 (d,  $J_{C-F}$  = 4.86 Hz), 150.83-151.05 (d,  $J_{C-F}$  = 22.00 Hz), 142.77-142.80 (d,  $J_{C-F}$  = 3.17 Hz), 133.82, 132.36, 132.31, 130.48, 129.41-129.45 (d,  $J_{C-F}$  = 3.11 Hz), 125.37-125.55 (d,  $J_{C-F}$  = 18.20 Hz), 124.70, 121.33, 115.68, 111.40, 90.79-92.69 (d,  $J_{C-F}$  = 189.59 Hz), 29.39;

**<sup>19</sup>F NMR (376 MHz, DMSO-*d*<sub>6</sub>):**  $\delta$  = -161.84;

**HRMS (ESI-TOF)** calcd for C<sub>17</sub>H<sub>12</sub>N<sub>4</sub>O<sub>4</sub>F [M + H]<sup>+</sup>: 355.0837; found: 355.0818.

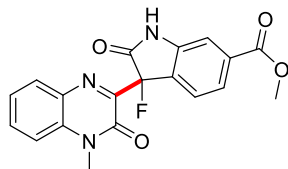

**3-Fluoro-3-(1-methylquinoxalin-2-one)-2-oxoindoline-6-carboxylate (3q)** was purified by silica column with dichloromethane/methanol = 50:0-20:1, yellow solid, 75.5 mg, 99% yield;

**<sup>1</sup>H NMR (400 MHz, DMSO-*d*<sub>6</sub>):**  $\delta$  = 11.22 (s, 1H, NH), 8.05 (dd,  $J$  = 1.46, 8.10 Hz, 1H, ArH), 7.76 (ddd,  $J$  = 1.54, 7.12, 8.58 Hz, 1H, ArH), 7.65 (d,  $J$  = 8.44 Hz, 1H, ArH), 7.58 (dt,  $J$  = 7.84, 1.32 Hz, 1H, ArH), 7.51 (ddd,  $J$  = 1.22, 7.24, 8.24 Hz, 1H, ArH), 7.46-7.47 (brs, 1H, ArH), 7.37 (dd,  $J$  = 2.46, 7.74 Hz, 1H, ArH), 3.86 (s, 3H, OCH<sub>3</sub>), 3.56 (s, 3H, NCH<sub>3</sub>);

**<sup>13</sup>C NMR (100 MHz, DMSO-*d*<sub>6</sub>):**  $\delta$  = 170.99-171.18 (d,  $J_{C-F}$  = 19.26 Hz), 166.00, 152.12-152.15



(d,  $J_{C-F}$  = 3.52 Hz), 151.38-151.60 (d,  $J_{C-F}$  = 21.85 Hz), 145.45-145.51 (d,  $J_{C-F}$  = 5.31 Hz), 133.62, 132.15-132.32 (d,  $J_{C-F}$  = 3.43 Hz), 132.32, 132.15, 130.42, 129.46-129.63 (d,  $J_{C-F}$  = 17.27 Hz), 125.59, 124.77, 123.94-123.97 (d,  $J_{C-F}$  = 3.15 Hz), 115.69, 110.85, 91.24-93.13 (d,  $J_{C-F}$  = 188.65 Hz), 52.97, 29.36;

**$^{19}\text{F}$  NMR (376 MHz, DMSO- $d_6$ ):**  $\delta$  = -162.02;

**HRMS (ESI-TOF)** calcd for  $\text{C}_{19}\text{H}_{15}\text{N}_3\text{O}_4\text{F}$   $[\text{M} + \text{H}]^+$ : 368.1041; found: 368.1019.

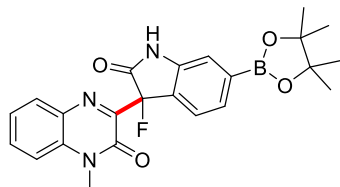

**6-(4',4',5',5'-Tetramethyl-1',3',2'-dioxaborolan-2'-yl)-3-fluoro-3-(1-methylquinoxalin-2-one)indolin-2-one (3r)** was purified by silica column with dichloromethane/methanol = 50:0-20:1, red solid, 50.7 mg, 57% yield;

**$^1\text{H}$  NMR (300 MHz, DMSO- $d_6$ ):**  $\delta$  = 11.20 (s, 1H, NH), 8.03 (dd,  $J$  = 1.50, 8.06 Hz, 1H, ArH), 7.75 (ddd,  $J$  = 1.56, 7.20, 8.64 Hz, 1H, ArH), 7.65 (dd,  $J$  = 1.24, 8.56 Hz, 1H, ArH), 7.50 (ddd,  $J$  = 1.28, 7.22, 8.30 Hz, 1H, ArH), 7.23-7.28 (m, 2H, ArH), 7.19 (dd,  $J$  = 2.38, 7.42 Hz, 1H, ArH), 3.55 (3H, NCH<sub>3</sub>), 1.29 (s, 12H, 4 $\times$ CH<sub>3</sub>);

**$^{13}\text{C}$  NMR (100 MHz, DMSO- $d_6$ ):**  $\delta$  = 171.05-171.25 (d,  $J_{C-F}$  = 19.32 Hz), 152.06 (d,  $J_{C-F}$  = 4.71 Hz), 151.86-152.03 (d,  $J_{C-F}$  = 17.19 Hz), 144.77-144.82 (d,  $J_{C-F}$  = 5.58 Hz), 133.60, 132.18, 132.10, 130.36, 128.93 (d,  $J_{C-F}$  = 2.94 Hz), 128.06, 127.89, 124.70, 124.66, 115.93, 115.67, 91.69-93.58 (d,  $J_{C-F}$  = 188.49 Hz), 84.44, 29.31, 25.10, 25.05;

**$^{19}\text{F}$  NMR (376 MHz, DMSO- $d_6$ ):**  $\delta$  = -161.18;

**HRMS (ESI-TOF)** calcd for  $\text{C}_{23}\text{H}_{24}\text{N}_3\text{O}_4\text{BF}$   $[\text{M} + \text{H}]^+$ : 436.1838; found: 436.1815.

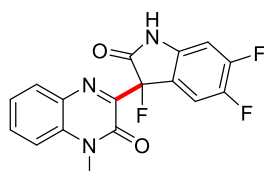

**3, 5, 6-Trifluoro-3-(1-methylquinoxalin-2-one)indolin-2-one (3s)** was purified by silica column with dichloromethane/methanol = 50:0-20:1, brick red solid, 57.3 mg, 80% yield;

**$^1\text{H}$  NMR (400 MHz, DMSO- $d_6$ ):**  $\delta$  = 11.24 (s, 1H, NH), 8.03 (dd,  $J$  = 1.46, 8.06 Hz, 1H, ArH), 7.76 (ddd,  $J$  = 1.54, 7.22, 8.62 Hz, 1H, ArH), 7.66 (dd,  $J$  = 1.28, 8.56 Hz, 1H, ArH), 7.51 (ddd,  $J$  = 1.22, 7.18, 8.24 Hz, 1H, ArH), 7.43 (ddd,  $J$  = 2.32, 7.98, 9.84 Hz, 1H, ArH), 7.06 (ddd,  $J$  = 1.19, 6.54, 10.50 Hz, 1H, ArH), 3.57 (s, 3H, NCH<sub>3</sub>);

**$^{13}\text{C}$  NMR (100 MHz, DMSO- $d_6$ ):**  $\delta$  = 171.23-171.42 (d,  $J_{C-F}$  = 19.16 Hz), 152.14-152.17 (d,  $J_{C-F}$  = 3.54 Hz), 151.16-151.38 (d,  $J_{C-F}$  = 22.13 Hz), 144.63, 142.19, 133.71, 132.24, 132.16, 130.44, 128.81, 124.67, 120.58, 115.65, 115.48, 101.06-101.29 (d,  $J_{C-F}$  = 22.93 Hz), 91.25-93.14 (d,  $J_{C-F}$  = 189.57 Hz), 29.36;

**$^{19}\text{F}$  NMR (376 MHz, DMSO- $d_6$ ):**  $\delta$  = -132.61 (dd,  $J_{C-F}$  = 6.99, 20.91 Hz), -146.96 (d,  $J_{C-F}$  = 21.43 Hz), -160.30 (d,  $J_{C-F}$  = 7.32 Hz);

**HRMS (ESI-TOF)** calcd for  $\text{C}_{17}\text{H}_{11}\text{N}_3\text{O}_2\text{F}_3$   $[\text{M} + \text{H}]^+$ : 346.0798; found: 346.0780.

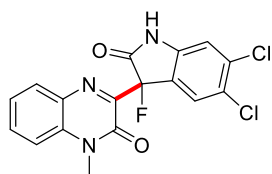

**3-Fluoro-5, 6-dichloro-3-(1-methylquinoxalin-2-one) indolin-2-one (3t)** was purified by silica column with dichloromethane/methanol = 50:0-20:1, brown solid, 50.4 mg, 53% yield;

**<sup>1</sup>H NMR (400 MHz, DMSO-*d*<sub>6</sub>):**  $\delta$  = 11.41 (s, 1H, NH), 8.03 (dd,  $J$  = 1.42, 8.04 Hz, 1H, ArH), 7.76 (ddd,  $J$  = 1.54, 7.12, 8.60 Hz, 1H, ArH), 7.67 (dd,  $J$  = 1.26, 8.62 Hz, 1H, ArH), 7.49-7.53 (m, 2H, ArH), 7.22 (d,  $J$  = 1.20 Hz, 1H, ArH), 3.57 (s, 3H, NCH<sub>3</sub>);

**<sup>13</sup>C NMR (100 MHz, DMSO-*d*<sub>6</sub>):**  $\delta$  = 170.81-171.01 (d,  $J_{C-F}$  = 19.45 Hz), 152.22-152.26 (d,  $J_{C-F}$  = 3.53 Hz), 150.93-151.15 (d,  $J_{C-F}$  = 21.92 Hz), 145.10-145.15 (d,  $J_{C-F}$  = 5.13 Hz), 134.74-134.78 (d,  $J_{C-F}$  = 16.04 Hz), 133.76, 132.26, 130.46, 127.45, 125.36-125.54 (d,  $J_{C-F}$  = 17.96 Hz), 124.68, 124.53-124.57 (d,  $J_{C-F}$  = 3.39 Hz), 12.53-124.57 (d,  $J_{C-F}$  = 3.39 Hz), 115.66, 112.83, 91.01-92.91 (d,  $J_{C-F}$  = 190.02 Hz), 29.38;

**<sup>19</sup>F NMR (376 MHz, DMSO-*d*<sub>6</sub>):**  $\delta$  = -161.17;

**HRMS (ESI-TOF)** calcd for C<sub>17</sub>H<sub>11</sub>N<sub>3</sub>O<sub>2</sub>Cl<sub>2</sub>F [M + H]<sup>+</sup>: 378.0207; found: 378.0198.

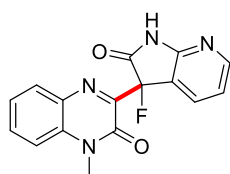

**3-Fluoro-3-(1-methylquinoxalin-2-one)-1H-pyrrolo[2,3-b] pyridine-2-one (3u)** was purified by silica column with dichloromethane/methanol = 50:0-20:1, light red solid, 54.9 mg, 92% yield;

**<sup>1</sup>H NMR (400 MHz, DMSO-*d*<sub>6</sub>):**  $\delta$  = 11.66 (s, 1H, NH), 8.25 (dt,  $J$  = 5.29, 1.89 Hz, 1H, ArH), 8.02 (dd,  $J$  = 1.50, 8.02 Hz, 1H, ArH), 7.76 (ddd,  $J$  = 1.58, 7.20, 8.60 Hz, 1H, ArH), 7.62-7.66 (m, 2H, ArH), 7.51 (ddd,  $J$  = 1.22, 7.20, 8.24 Hz, 1H, ArH), 6.96-7.00 (m, 1H, ArH), 3.57 (s, 3H, NCH<sub>3</sub>);

**<sup>13</sup>C NMR (100 MHz, DMSO-*d*<sub>6</sub>):**  $\delta$  = 171.01-171.21 (d,  $J_{C-F}$  = 19.20 Hz), 159.52-159.58 (d,  $J_{C-F}$  = 5.65 Hz), 152.17-152.20 (d,  $J_{C-F}$  = 3.61 Hz), 151.16-151.38 (d,  $J_{C-F}$  = 22.01 Hz), 150.72-150.75 (d,  $J_{C-F}$  = 3.72 Hz), 133.66, 133.41, 132.31, 132.14, 130.43, 124.74, 119.49-119.67 (d,  $J_{C-F}$  = 18.40 Hz), 118.75-118.77 (d,  $J_{C-F}$  = 2.76 Hz), 115.71, 91.44-93.33 (d,  $J_{C-F}$  = 189.80 Hz), 29.40;

**<sup>19</sup>F NMR (376 MHz, DMSO-*d*<sub>6</sub>):**  $\delta$  = -162.39;

**HRMS (ESI-TOF)** calcd for C<sub>16</sub>H<sub>12</sub>N<sub>4</sub>O<sub>2</sub>F [M + H]<sup>+</sup>: 311.0939; found: 311.0922.

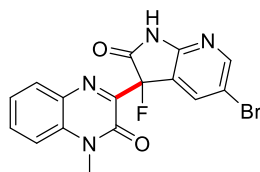

**3-Fluoro-5-bromo-3-(1-methylquinoxalin-2-one)-1H-pyrrolo[2,3-b] pyridine-2-one (3v)** was purified by silica column with dichloromethane/methanol = 50:0-20:1, red solid, 65.4 mg, 83% yield;

**<sup>1</sup>H NMR (400 MHz, DMSO-*d*<sub>6</sub>):**  $\delta$  = 11.88 (s, 1H, NH), 8.40 (t,  $J$  = 2.22 Hz, 1H, ArH), 8.04 (dd,

$J = 1.50, 8.04$  Hz, 1H, ArH), 7.93 (t,  $J = 2.28$  Hz, 1H, ArH), 7.78 (t,  $J = 7.90$  Hz, 1H, ArH), 7.69 (d,  $J = 4.44$  Hz, 2H, ArH), 7.53 (t,  $J = 7.60$  Hz, 1H, ArH), 3.58 (s, 3H, NCH<sub>3</sub>);

**<sup>13</sup>C NMR (100 MHz, DMSO-*d*<sub>6</sub>):**  $\delta = 172.73, 158.44, 152.31, 151.06, 142.83, 136.19, 133.78, 132.34, 130.49, 124.73, 121.26, 115.69, 113.25, 91.22, 29.43$ ;

**<sup>19</sup>F NMR (376 MHz, DMSO-*d*<sub>6</sub>):**  $\delta = -163.30$ ;

**HRMS (ESI-TOF)** calcd for C<sub>16</sub>H<sub>11</sub>N<sub>4</sub>O<sub>2</sub>FBr [M + H]<sup>+</sup>: 389.0044; found: 389.0046.

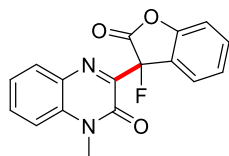

**3-Fluoro-3-(1-methylquinoxalin-2-one)-Benzofuran-2-one (3w)** was purified by silica column with dichloromethane/methanol = 50:0-20:1, solid, 24.4 mg, 23% yield;

**<sup>1</sup>H NMR (400 MHz, DMSO-*d*<sub>6</sub>):**  $\delta = 8.98$  (dd,  $J = 1.20, 6.40$  Hz, 1H, ArH), 7.80 (ddd,  $J = 1.20, 5.72, 6.84$  Hz, 1H, ArH), 7.70 (dd,  $J = 0.96, 6.84$  Hz, 1H, ArH), 7.60-7.63 (m, 1H, ArH), 7.55 (ddd,  $J = 0.96, 5.76, 6.60$  Hz, 2H, ArH), 7.43-7.46 (m, 2H, ArH), 7.24 (tt,  $J = 0.76, 6.08$  Hz, 1H, ArH), 3.59 (s, 3H, NCH<sub>3</sub>);

**<sup>13</sup>C NMR (100 MHz, DMSO-*d*<sub>6</sub>):**  $\delta = 168.88$ -169.06 (d,  $J_{C-F} = 13.10$  Hz), 155.49-155.54 (d,  $J_{C-F} = 3.81$  Hz), 152.33-152.36 (d,  $J_{C-F} = 2.17$  Hz), 150.26-150.44 (d,  $J_{C-F} = 13.93$  Hz), 134.13-134.16 (d,  $J_{C-F} = 2.21$  Hz), 133.71, 132.76, 130.64, 126.09, 125.64-125.67 (d,  $J_{C-F} = 9.68$  Hz), 125.08, 122.65-122.80 (d,  $J_{C-F} = 11.84$  Hz), 115.99, 112.11-112.13 (d,  $J_{C-F} = 1.2$  Hz), 89.79-91.33 (d,  $J_{C-F} = 115.68$  Hz), 29.65;

**<sup>19</sup>F NMR (376 MHz, DMSO-*d*<sub>6</sub>):**  $\delta = -155.05$ ;

**HRMS (ESI-TOF)** calcd for C<sub>16</sub>H<sub>11</sub>N<sub>4</sub>O<sub>2</sub>FBr [M + H]<sup>+</sup>: 311.0826; found: 311.0807.

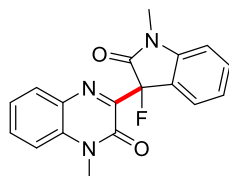

**1-Methyl-3-fluoro-3-(1-methylquinoxalin-2-one) indolin-2-one (3x)** was purified by silica column with dichloromethane/methanol = 50:0-20:1, pale solid, 59.9 mg, 91% yield;

**<sup>1</sup>H NMR (400 MHz, DMSO-*d*<sub>6</sub>):**  $\delta = 8.02$  (dd,  $J = 1.50, 8.06$  Hz, 1H, ArH), 7.74 (ddd,  $J = 1.52, 7.18, 8.62$  Hz, 1H, ArH), 7.60 (dd,  $J = 1.18, 8.58$  Hz, 1H, ArH), 7.51 (ddd,  $J = 1.24, 7.24, 8.30$  Hz, 1H, ArH), 7.44-7.47 (m, 1H, ArH), 7.18-7.21 (m, 1H, ArH), 7.15 (d,  $J = 7.88$  Hz, 1H, ArH), 7.03 (tt,  $J = 1.08, 7.52$  Hz, 1H, ArH), 3.51 (s, 3H, NCH<sub>3</sub>), 3.22 (s, 3H, NCH<sub>3</sub>);

**<sup>13</sup>C NMR (100 MHz, DMSO-*d*<sub>6</sub>):**  $\delta = 170.04$ -170.24 (d,  $J_{C-F} = 19.95$  Hz), 152.02 (d,  $J_{C-F} = 3.66$  Hz), 151.59-151.81 (d,  $J_{C-F} = 22.20$  Hz), 146.09-146.14 (d,  $J_{C-F} = 5.18$  Hz), 133.44, 132.79-132.83 (d,  $J_{C-F} = 3.60$  Hz), 132.48, 132.00, 130.32, 124.96, 124.82, 123.74-123.92 (d,  $J_{C-F} = 17.86$  Hz), 123.55-123.58 (d,  $J_{C-F} = 3.02$  Hz), 115.59, 110.12, 91.25-93.14 (d,  $J_{C-F} = 188.24$  Hz), 29.34, 26.82;

**<sup>19</sup>F NMR (376 MHz, DMSO-*d*<sub>6</sub>):**  $\delta = -160.94$ ;

**HRMS (ESI-TOF)** calcd for C<sub>18</sub>H<sub>15</sub>N<sub>3</sub>O<sub>2</sub>F [M + H]<sup>+</sup>: 324.1143; found: 324.1125.

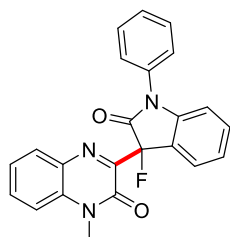

**1-Phenyl-3-fluoro-3-(1-methylquinoxalin-2-one) indolin-2-one (3y)** was purified by silica column with dichloromethane/methanol = 50:0-20:1, pale solid, 69.1 mg, 86% yield;

**<sup>1</sup>H NMR (400 MHz, DMSO-*d*<sub>6</sub>):**  $\delta$  = 8.09 (dd,  $J$  = 1.52, 8.04 Hz, 1H, ArH), 7.77 (ddd,  $J$  = 1.56, 7.14, 8.60 Hz, 1H, ArH), 7.63-7.68 (m, 3H, ArH), 7.51-7.59 (m, 4H, ArH), 7.44-7.47 (tt,  $J$  = 1.72, 7.72 Hz, 1H, ArH), 7.33-7.36 (m, 1H, ArH), 7.09 (t,  $J$  = 7.58 Hz, 1H, ArH), 6.86 (d,  $J$  = 7.96 Hz, 1H, ArH), 3.60 (s, 3H, NCH<sub>3</sub>);

**<sup>13</sup>C NMR (100 MHz, DMSO-*d*<sub>6</sub>):**  $\delta$  = 169.36-169.56 (d,  $J_{C-F}$  = 19.87 Hz), 152.27-152.31 (d,  $J_{C-F}$  = 3.67 Hz), 151.80-152.03 (d,  $J_{C-F}$  = 22.37 Hz), 146.20-146.26 (d,  $J_{C-F}$  = 5.13 Hz), 134.18, 133.64, 132.74-132.78 (d,  $J_{C-F}$  = 3.60 Hz), 132.35, 132.20, 130.47, 130.35, 129.07, 127.03, 125.63, 124.83, 123.93-123.99 (d,  $J_{C-F}$  = 3.06 Hz), 123.59-123.77 (d,  $J_{C-F}$  = 18.15 Hz), 115.79, 110.44, 91.25-93.14 (d,  $J_{C-F}$  = 189.49 Hz), 29.56;

**<sup>19</sup>F NMR (376 MHz, DMSO-*d*<sub>6</sub>):**  $\delta$  = -160.29;

**HRMS (ESI-TOF)** calcd for C<sub>23</sub>H<sub>17</sub>N<sub>3</sub>O<sub>2</sub>F [M + H]<sup>+</sup>: 386.1299; found: 386.1280.

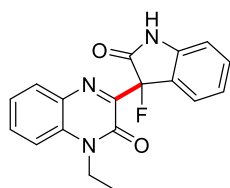

**3-Fluoro-3-(1-ethylquinoxalin-2-one) indolin-2-one (3ab)** was purified by silica column with dichloromethane/methanol = 50:0-20:1, light brown solid, 59.4 mg, 90% yield;

**<sup>1</sup>H NMR (400 MHz, DMSO-*d*<sub>6</sub>):**  $\delta$  = 10.94 (s, 1H, NH), 8.05 (dd,  $J$  = 1.46, 8.06 Hz, 1H, ArH), 7.69-7.77 (m, 2H, ArH), 7.50 (ddd,  $J$  = 1.50, 6.86, 8.22 Hz, 1H, ArH), 7.35-7.40 (m, 1H, ArH), 7.18-7.21 (m, 1H, ArH), 6.92-6.98 (m, 2H, ArH), 4.16-4.22 (m, 2H, NCH<sub>2</sub>CH<sub>3</sub>), 1.15 (t,  $J$  = 7.10 Hz, 1H, NCH<sub>2</sub>CH<sub>3</sub>);

**<sup>13</sup>C NMR (100 MHz, DMSO-*d*<sub>6</sub>):**  $\delta$  = 171.36-171.56 (d,  $J_{C-F}$  = 19.23 Hz), 152.04-152.26 (d,  $J_{C-F}$  = 22.29 Hz), 151.64-151.68 (d,  $J_{C-F}$  = 3.39 Hz), 145.08-145.13 (d,  $J_{C-F}$  = 5.63 Hz), 132.51, 132.47, 132.37-132.41 (d,  $J_{C-F}$  = 3.73 Hz), 132.26, 130.72, 125.24, 124.92-125.10 (d,  $J_{C-F}$  = 17.84 Hz), 124.61, 122.62-122.65 (d,  $J_{C-F}$  = 3.25 Hz), 115.30, 111.07-111.09 (d,  $J_{C-F}$  = 1.92 Hz), 91.79-93.67 (d,  $J_{C-F}$  = 187.93 Hz), 37.35, 12.77;

**<sup>19</sup>F NMR (376 MHz, DMSO-*d*<sub>6</sub>):**  $\delta$  = -159.80;

**HRMS (ESI-TOF)** calcd for C<sub>18</sub>H<sub>15</sub>N<sub>3</sub>O<sub>2</sub>F [M + H]<sup>+</sup>: 324.1143; found: 324.1125.

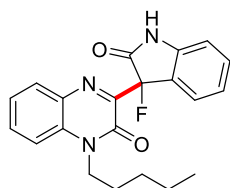

**3-Fluoro-3-(1-pentylquinoxalin-2-one) indolin-2-one (3ac)** was purified by silica column with dichloromethane/methanol = 50:0-20:1, red solid, 65.2 mg, 97% yield;

**<sup>1</sup>H NMR (400 MHz, DMSO-*d*<sub>6</sub>):**  $\delta$  = 10.94 (s, 1H, NH), 8.05 (dd,  $J$  = 1.48, 8.04 Hz, 1H, ArH), 7.74 (ddd,  $J$  = 1.52, 6.96, 8.52 Hz, 1H, ArH), 7.69 (dd,  $J$  = 1.38, 8.70 Hz, 1H, ArH), 7.49 (ddd,  $J$  = 1.32, 7.04, 8.22 Hz, 1H, ArH), 7.35-7.39 (m, 1H, ArH), 7.17-7.19 (m, 1H, ArH), 6.91-6.98 (m, 2H, ArH), 4.10-4.18 (m, 2H, NCH<sub>2</sub>CH<sub>2</sub>(CH<sub>2</sub>)<sub>2</sub>CH<sub>3</sub>), 1.52-1.55 (m, 2H, NCH<sub>2</sub>CH<sub>2</sub>(CH<sub>2</sub>)<sub>2</sub>CH<sub>3</sub>), 1.21-1.26 (m, 4H, NCH<sub>2</sub>CH<sub>2</sub>(CH<sub>2</sub>)<sub>2</sub>CH<sub>3</sub>), 0.77-0.80 (m, 3H, NCH<sub>2</sub>CH<sub>2</sub>(CH<sub>2</sub>)<sub>2</sub>CH<sub>3</sub>);

**<sup>13</sup>C NMR (100 MHz, DMSO-*d*<sub>6</sub>):**  $\delta$  = 171.33-171.53 (d,  $J_{C-F}$  = 19.42 Hz), 152.02-152.24 (d,  $J_{C-F}$  = 22.29 Hz), 151.89-151.92 (d,  $J_{C-F}$  = 3.43 Hz), 145.08-145.14 (d,  $J_{C-F}$  = 5.56 Hz), 132.58, 132.44-132.48 (d,  $J_{C-F}$  = 3.70 Hz), 132.35, 132.22, 130.70, 125.16, 124.92-125.10 (d,  $J_{C-F}$  = 3.70 Hz), 124.61, 122.58-122.61 (d,  $J_{C-F}$  = 3.18 Hz), 115.54, 111.08-111.10 (d,  $J_{C-F}$  = 1.84 Hz), 91.78-93.66 (d,  $J_{C-F}$  = 188.01 Hz), 41.94, 28.69, 26.98, 22.18, 14.27;

**<sup>19</sup>F NMR (376 MHz, DMSO-*d*<sub>6</sub>):**  $\delta$  = -159.98;

**HRMS (ESI-TOF)** calcd for C<sub>21</sub>H<sub>21</sub>N<sub>3</sub>O<sub>2</sub>F [M + H]<sup>+</sup>: 366.1612; found: 366.1593.

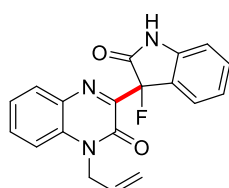

**3-Fluoro-3-(1-allylquinoxalin-2-one) indolin-2-one (3ad)** was purified by silica column with dichloromethane/methanol = 50:0-20:1, light brown solid, 59.7 mg, 88% yield;

**<sup>1</sup>H NMR (400 MHz, DMSO-*d*<sub>6</sub>):**  $\delta$  = 10.94 (s, 1H, NH), 8.06 (dd,  $J$  = 1.50, 8.06 Hz, 1H, ArH), 7.72 (ddd,  $J$  = 1.58, 7.20, 8.66 Hz, 1H, ArH), 7.59 (dd,  $J$  = 1.20, 8.60 Hz, 1H, ArH), 7.50 (ddd,  $J$  = 1.18, 7.24, 8.22 Hz, 1H, ArH), 7.35-7.40 (m, 1H, ArH), 7.20-7.22 (m, 1H, ArH), 6.92-6.98 (m, 2H, ArH), 5.80-5.88 (m, 1H, NCH<sub>2</sub>CH=CH<sub>2</sub>), 5.15 (dd,  $J$  = 1.38, 10.50 Hz, 1H, NCH<sub>2</sub>CH=CH<sub>2</sub>), 4.98 (dd,  $J$  = 1.40, 17.24 Hz, 1H, NCH<sub>2</sub>CH=CH<sub>2</sub>), 4.80-4.83 (m, 2H, NCH<sub>2</sub>CH=CH<sub>2</sub>);

**<sup>13</sup>C NMR (100 MHz, DMSO-*d*<sub>6</sub>):**  $\delta$  = 171.30-171.49 (d,  $J_{C-F}$  = 19.37 Hz), 152.09-152.31 (d,  $J_{C-F}$  = 22.43 Hz), 151.89-151.92 (d,  $J_{C-F}$  = 5.51 Hz), 145.07-145.13 (d,  $J_{C-F}$  = 5.51 Hz), 132.64, 132.49-132.53 (d,  $J_{C-F}$  = 3.72 Hz), 132.28, 132.11, 131.48, 130.59, 125.24, 124.89-125.07 (d,  $J_{C-F}$  = 17.75 Hz), 124.74, 122.64-122.67 (d,  $J_{C-F}$  = 3.27 Hz), 117.86, 115.87, 110.10, 91.79-93.67 (d,  $J_{C-F}$  = 188.14 Hz), 44.14;

**<sup>19</sup>F NMR (376 MHz, DMSO-*d*<sub>6</sub>):**  $\delta$  = -159.76;

**HRMS (ESI-TOF)** calcd for C<sub>19</sub>H<sub>15</sub>N<sub>3</sub>O<sub>2</sub>F [M + H]<sup>+</sup>: 336.1143; found: 336.1125.

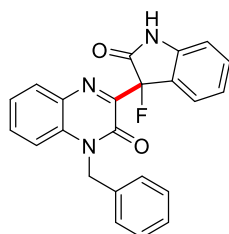

**3-Fluoro-3-(1-benzylquinoxalin-2-one) indolin-2-one (3ae)** was purified by silica column with dichloromethane/methanol = 50:0-20:1, yellow solid, 31.5 mg, 40% yield;

**<sup>1</sup>H NMR (400 MHz, DMSO-*d*<sub>6</sub>):**  $\delta$  = 11.00 (s, 1H, NH), 8.05 (dd,  $J$  = 1.50, 8.02 Hz, 1H, ArH), 7.65 (ddd,  $J$  = 1.56, 7.16, 8.62 Hz, 1H, ArH), 7.57 (dd,  $J$  = 1.28, 8.68 Hz, 1H, ArH), 7.48 (ddd,  $J$  = 1.24, 7.20, 8.24 Hz, 1H, ArH), 7.36-7.41 (m, 1H, ArH), 7.23-7.28 (m, 5H, ArH), 7.12-7.14 (m, 1H,

ArH), 6.95-6.99 (m, 2H, ArH), 5.47 (d,  $J = 15.92$  Hz, 1H,  $\text{NCH}_2$ ), 5.37 (d,  $J = 15.96$  Hz, 1H,  $\text{NCH}_2$ );  $^{13}\text{C}$  NMR (100 MHz, DMSO- $d_6$ ):  $\delta = 171.33$ -171.53 (d,  $J_{\text{C-F}} = 19.30$  Hz), 152.24-152.47 (d,  $J_{\text{C-F}} = 22.30$  Hz), 151.89-151.92 (d,  $J_{\text{C-F}} = 3.38$  Hz), 145.13-145.18 (d,  $J_{\text{C-F}} = 5.49$  Hz), 135.79, 132.68, 132.54-132.58 (d,  $J_{\text{C-F}} = 3.65$  Hz), 132.42, 132.19, 130.70, 129.23, 128.00, 127.12, 125.29, 125.07, 124.88, 122.66-122.69 (d,  $J_{\text{C-F}} = 3.01$  Hz), 115.91, 111.16, 91.87-93.75 (d,  $J_{\text{C-F}} = 188.29$  Hz), 45.10;  $^{19}\text{F}$  NMR (376 MHz, DMSO- $d_6$ ):  $\delta = -159.74$ ;  
**HRMS (ESI-TOF)** calcd for  $\text{C}_{23}\text{H}_{17}\text{N}_3\text{O}_2\text{F}$   $[\text{M} + \text{H}]^+$ : 386.1299; found: 386.1278.

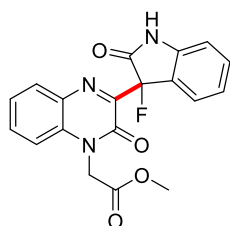

**3-Fluoro-3-(1-methylacetatequinoxalin-2-one) indolin-2-one (3af)** was purified by silica column with dichloromethane/methanol = 50:0-20:1, red solid, 68.7 mg, 93% yield;

$^1\text{H}$  NMR (400 MHz, DMSO- $d_6$ ):  $\delta = 10.96$  (s, 1H, NH), 8.08 (dd,  $J = 1.44$ , 8.04 Hz, 1H, ArH), 7.73 (ddd,  $J = 1.52$ , 7.24, 8.62 Hz, 1H, ArH), 7.62 (dd,  $J = 1.18$ , 8.62 Hz, 1H, ArH), 7.53 (ddd,  $J = 1.16$ , 7.16, 8.18 Hz, 1H, ArH), 7.36-7.40 (m, 1H, ArH), 7.20-7.22 (m, 1H, ArH), 6.93-6.98 (m, 2H, ArH), 5.08 (s, 2H,  $\text{NCH}_2$ ), 3.66 (s, 3H,  $\text{OCH}_3$ );

$^{13}\text{C}$  NMR (100 MHz, DMSO- $d_6$ ):  $\delta = 171.14$ -171.33 (d,  $J_{\text{C-F}} = 19.35$  Hz), 168.04, 151.82-152.04 (d,  $J_{\text{C-F}} = 22.60$  Hz), 151.90-151.94 (d,  $J_{\text{C-F}} = 3.46$  Hz), 145.04-145.10 (d,  $J_{\text{C-F}} = 5.55$  Hz), 132.90, 132.61-132.65 (d,  $J_{\text{C-F}} = 3.66$  Hz), 132.36, 132.09, 130.66, 125.29, 125.02, 124.69-124.87 (d,  $J_{\text{C-F}} = 17.88$  Hz), 122.71-122.74 (d,  $J_{\text{C-F}} = 3.28$  Hz), 115.50, 111.17, 91.70-93.58 (d,  $J_{\text{C-F}} = 188.70$  Hz), 53.01, 43.84;

$^{19}\text{F}$  NMR (376 MHz, DMSO- $d_6$ ):  $\delta = -159.98$ ;

**HRMS (ESI-TOF)** calcd for  $\text{C}_{19}\text{H}_{15}\text{N}_3\text{O}_4\text{F}$   $[\text{M} + \text{H}]^+$ : 368.1041; found: 368.1021.

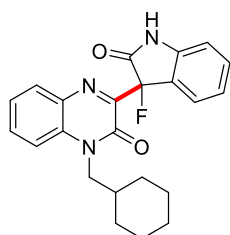

**3-Fluoro-3-(1-cyclohexylmethylquinoxalin-2-one) indolin-2-one (3ag)** was purified by silica column with dichloromethane/methanol = 50:0-20:1, tawny solid, 67.5 mg, 83% yield;

$^1\text{H}$  NMR (400 MHz, DMSO- $d_6$ ):  $\delta = 10.93$  (s, 1H, NH), 8.04 (dd,  $J = 1.44$ , 8.04 Hz, 1H, ArH), 7.67-7.75 (m, 2H, ArH), 7.49 (t,  $J = 7.40$  Hz, 1H, ArH), 7.37 (t,  $J = 7.70$  Hz, 1H, ArH), 7.16-7.19 (m, 1H, ArH), 6.91-6.97 (m, 2H, ArH), 3.93-4.12 (m, 2H,  $\text{NCH}_2$ ), 1.69-1.75 (m, 1H,  $\text{NCH}_2\text{CH}$ ), 1.45-1.57 (m, 6H,  $3 \times \text{CH}_2$ ), 1.01-1.07 (m, 4H,  $2 \times \text{CH}_2$ );

$^{13}\text{C}$  NMR (100 MHz, DMSO- $d_6$ ):  $\delta = 171.34$ -171.54 (d,  $J_{\text{C-F}} = 19.40$  Hz), 152.32-152.36 (d,  $J_{\text{C-F}} = 3.54$  Hz), 152.08-152.30 (d,  $J_{\text{C-F}} = 22.27$  Hz), 145.08-145.14 (d,  $J_{\text{C-F}} = 5.59$  Hz), 132.94, 132.42-132.46 (d,  $J_{\text{C-F}} = 3.72$  Hz), 132.31, 132.09, 130.68, 125.09, 124.94-125.12 (d,  $J_{\text{C-F}} = 17.85$  Hz), 124.57, 122.53-122.56 (d,  $J_{\text{C-F}} = 3.10$  Hz), 115.84, 111.07-111.09 (d,  $J_{\text{C-F}} = 1.82$  Hz), 91.81-93.69

(d,  $J_{C-F}$  = 187.77 Hz), 47.34, 36.12, 30.40, 30.35, 26.16, 25.63;

**$^{19}\text{F}$  NMR (376 MHz, DMSO- $d_6$ ):**  $\delta$  = -160.07;

**HRMS (ESI-TOF)** calcd for  $\text{C}_{23}\text{H}_{23}\text{N}_3\text{O}_2\text{F}$   $[\text{M} + \text{H}]^+$ : 392.1769; found: 392.1749.

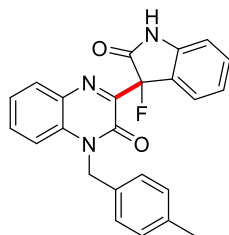

**3-Fluoro-3-(1-(*p*-methylphenyl)-quinoxalin-2-one) indolin-2-one (3ah)** was purified by silica column with dichloromethane/methanol = 50:0-20:1, tawny solid, 63.7 mg, 75% yield;

**$^1\text{H}$  NMR (400 MHz, DMSO- $d_6$ ):**  $\delta$  = 10.98 (s, 1H, NH), 8.06 (dd,  $J$  = 1.50, 8.00 Hz, 1H, ArH), 7.65 (ddd,  $J$  = 1.56, 7.18, 8.62 Hz, 1H, ArH), 7.57 (dd,  $J$  = 1.28, 8.68 Hz, 1H, ArH), 7.47 (ddd,  $J$  = 1.22, 7.14, 8.20 Hz, 1H, ArH), 7.36-7.41 (m, 1H, ArH), 6.95-7.09 (m, 6H, ArH), 5.31-5.46 (m, 2H,  $\text{NCH}_2$ ), 3.38 (s, 3H,  $\text{NCH}_3$ ), 2.21 (s, 3H,  $\text{CH}_3$ );

**$^{13}\text{C}$  NMR (100 MHz, DMSO- $d_6$ ):**  $\delta$  = 171.34-171.54 (d,  $J_{C-F}$  = 19.35 Hz), 152.23-152.46 (d,  $J_{C-F}$  = 22.39 Hz), 152.30-152.34 (d,  $J_{C-F}$  = 3.29 Hz), 145.11-145.17 (d,  $J_{C-F}$  = 5.53 Hz), 137.26, 132.76, 132.65, 132.54-132.58 (d,  $J_{C-F}$  = 3.80 Hz), 132.40, 132.15, 130.68, 129.76, 127.15, 125.27, 124.89-125.07 (d,  $J_{C-F}$  = 17.85 Hz), 124.83, 122.66-122.69 (d,  $J_{C-F}$  = 3.28 Hz), 115.94, 111.15, 91.86-93.74 (d,  $J_{C-F}$  = 188.40 Hz), 44.86, 21.05;

**$^{19}\text{F}$  NMR (376 MHz, DMSO- $d_6$ ):**  $\delta$  = -159.80;

**HRMS (ESI-TOF)** calcd for  $\text{C}_{24}\text{H}_{19}\text{N}_3\text{O}_2\text{F}$   $[\text{M} + \text{H}]^+$ : 400.1456; found: 400.1434.

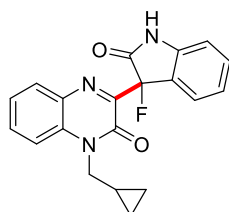

**3-Fluoro-3-(1-cyclopropylmethylquinoxalin-2-one) indolin-2-one (3ai)** was purified by silica column with dichloromethane/methanol = 50:0-20:1, light yellow solid, 64.2 mg, 92% yield;

**$^1\text{H}$  NMR (400 MHz, DMSO- $d_6$ ):**  $\delta$  = 10.96 (s, 1H, NH), 8.06 (dd,  $J$  = 1.46, 7.98 Hz, 1H, ArH), 7.81 (dd,  $J$  = 1.40, 8.64 Hz, 1H, ArH), 7.75 (dt,  $J$  = 1.50, 7.02 Hz, 1H, ArH), 7.50 (ddd,  $J$  = 1.34, 6.96, 8.20 Hz, 1H, ArH), 7.35-7.39 (m, 1H, ArH), 7.18-7.20 (m, 1H, ArH), 6.92-6.98 (m, 2H, ArH), 4.06-4.16 (m, 2H,  $\text{NCH}_2$ ), 1.15-1.22 (m, 1H,  $\text{CH}$ ), 0.27-0.42 (m, 4H,  $2 \times \text{CH}_2$ );

**$^{13}\text{C}$  NMR (100 MHz, DMSO- $d_6$ ):**  $\delta$  = 171.33-171.53 (d,  $J_{C-F}$  = 19.45 Hz), 152.22-152.45 (d,  $J_{C-F}$  = 22.49 Hz), 152.19-152.22 (d,  $J_{C-F}$  = 3.77 Hz), 145.08-145.14 (d,  $J_{C-F}$  = 5.59 Hz), 132.83, 132.45-132.49 (d,  $J_{C-F}$  = 3.68 Hz), 132.28, 132.20, 130.67, 125.13, 124.90-125.08 (d,  $J_{C-F}$  = 17.81 Hz), 124.66, 122.58-122.62 (d,  $J_{C-F}$  = 3.28 Hz), 115.77, 111.08-111.10 (d,  $J_{C-F}$  = 2.04 Hz), 91.82-93.70 (d,  $J_{C-F}$  = 188.02 Hz), 45.80, 10.00, 4.16, 4.11;

**$^{19}\text{F}$  NMR (376 MHz, DMSO- $d_6$ ):**  $\delta$  = -159.99;

**HRMS (ESI-TOF)** calcd for  $\text{C}_{20}\text{H}_{17}\text{N}_3\text{O}_2\text{F}$   $[\text{M} + \text{H}]^+$ : 350.1299; found: 350.1280.

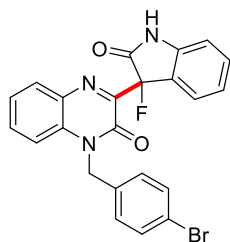

**3-Fluoro-3-(1-(4-bromobenzyl)-quinoxalin-2-one) indolin-2-one (3aj)** was purified by silica column with dichloromethane/methanol = 50:0-20:1, light yellow solid, 35.7 mg, 37% yield;

**<sup>1</sup>H NMR (400 MHz, DMSO-*d*<sub>6</sub>):**  $\delta$  = 10.98 (s, 1H, NH), 8.07 (dd,  $J$  = 1.52, 8.00 Hz, 1H, ArH), 7.66 (ddd,  $J$  = 1.52, 7.18, 8.64 Hz, 1H, ArH), 7.56 (dd,  $J$  = 1.21, 8.68 Hz, 1H, ArH), 7.47-7.50 (m, 3H, ArH), 7.36-7.41 (m, 1H, ArH), 7.25-7.27 (m, 1H, ArH), 7.10 (d,  $J$  = 8.56 Hz, 2H, ArH), 6.99 (dd,  $J$  = 1.16, 7.86 Hz, 2H, ArH), 5.35-5.48 (m, 2H, NCH<sub>2</sub>);

**<sup>13</sup>C NMR (100 MHz, DMSO-*d*<sub>6</sub>):**  $\delta$  = 171.30-171.50 (d,  $J_{C-F}$  = 19.32 Hz), 152.42 (d,  $J_{C-F}$  = 22.64 Hz), 152.28-152.31 (d,  $J_{C-F}$  = 3.23 Hz), 145.09-145.14 (d,  $J_{C-F}$  = 5.54 Hz), 135.27, 132.61, 132.55 (d,  $J_{C-F}$  = 3.68 Hz), 132.43, 132.26, 132.12, 130.75, 129.40, 125.35, 124.95, 124.84-125.02 (d,  $J_{C-F}$  = 17.68 Hz), 122.71 (d,  $J_{C-F}$  = 3.11 Hz), 121.13, 115.81, 111.14, 91.85-93.73 (d,  $J_{C-F}$  = 188.25 Hz), 45.80, 10.00, 4.16, 4.11;

**<sup>19</sup>F NMR (376 MHz, DMSO-*d*<sub>6</sub>):**  $\delta$  = -159.69;

**HRMS (ESI-TOF)** calcd for C<sub>23</sub>H<sub>16</sub>N<sub>3</sub>O<sub>2</sub>FBr [M + H]<sup>+</sup>: 464.0404; found: 464.0379.

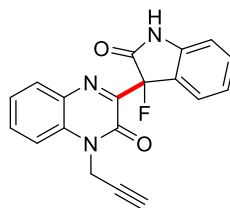

**3-Fluoro-3-(1-(2-propynyl)-quinoxalin-2-one) indolin-2-one (3ak)** was purified by silica column with dichloromethane/methanol = 50:0-20:1, orange solid, 64.1 mg, 96% yield;

**<sup>1</sup>H NMR (400 MHz, DMSO-*d*<sub>6</sub>):**  $\delta$  = 10.98 (s, 1H, NH), 8.09 (dd,  $J$  = 1.48, 8.00 Hz, 1H, ArH), 7.81 (ddd,  $J$  = 1.50, 7.18, 8.60 Hz, 1H, ArH), 7.16 (dd,  $J$  = 1.20, 8.56 Hz, 1H, ArH), 7.55 (ddd,  $J$  = 1.20, 7.24, 8.20 Hz, 1H, ArH), 7.36-7.41 (m, 1H, ArH), 7.21-7.23 (m, 1H, ArH), 6.93-6.99 (m, 2H, ArH), 4.97-5.09 (m, 2H, NCH<sub>2</sub>), 5.35-5.48 (m, 2H, NCH<sub>2</sub>), 3.36 (m, 1H, CH);

**<sup>13</sup>C NMR (100 MHz, DMSO-*d*<sub>6</sub>):**  $\delta$  = 171.21-171.40 (d,  $J_{C-F}$  = 19.35 Hz), 151.97-152.19 (d,  $J_{C-F}$  = 22.34 Hz), 151.17-151.20 (d,  $J_{C-F}$  = 3.45 Hz), 145.07-145.13 (d,  $J_{C-F}$  = 5.57 Hz), 132.61-132.65 (d,  $J_{C-F}$  = 3.84 Hz), 132.31, 132.28, 131.94, 130.68, 125.38, 125.15, 124.68-124.86 (d,  $J_{C-F}$  = 17.75 Hz), 122.73-122.70 (d,  $J_{C-F}$  = 3.12 Hz), 115.82, 111.14-111.16 (d,  $J_{C-F}$  = 1.96 Hz), 91.75-93.64 (d,  $J_{C-F}$  = 188.80 Hz), 77.93, 76.19, 31.66;

**<sup>19</sup>F NMR (376 MHz, DMSO-*d*<sub>6</sub>):**  $\delta$  = -159.79;

**HRMS (ESI-TOF)** calcd for C<sub>19</sub>H<sub>12</sub>N<sub>3</sub>O<sub>2</sub>F [M + H]<sup>+</sup>: 334.0986; found: 334.0970.



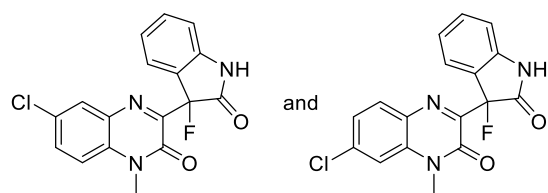

(regioisomeric mixture with 2:1 ratio)

**3-Fluoro-3-(6-chloro-1-methylquinoxalin-2-one) indolin-2-one and 3-fluoro-3-(7-chloro-1-methylquinoxalin-2-one) indolin-2-one (3a1 and 3a2)** was purified by silica column with dichloromethane/methanol = 50:0-20:1, light yellow solid, 46.1 mg, 66% yield;

**<sup>1</sup>H NMR (400 MHz, DMSO-*d*<sub>6</sub>):**  $\delta$  = 10.98 (s, 1.53H, NH), 8.12 (d,  $J$  = 2.48 Hz, 1H, ArH), 8.04 (d,  $J$  = 8.60 Hz, 0.46H, ArH), 7.75-7.81 (m, 1.68H, ArH), 7.68 (d,  $J$  = 9.12 Hz, 1.11H, ArH), 7.55 (dd,  $J$  = 2.16, 8.60 Hz, 0.53H, ArH), 7.35-7.40 (m, 1.74H, ArH), 7.17-7.18 (m, 1.63H, ArH), 6.93-6.98 (m, 3.34H, ArH), 3.55 (s, 2.98H, NCH<sub>3</sub>), 3.55 (s, 1.52H, NCH<sub>3</sub>);

**<sup>13</sup>C NMR (100 MHz, DMSO-*d*<sub>6</sub>):**  $\delta$  = 171.12-171.32 (d,  $J_{C-F}$  = 19.48 Hz), 153.50-153.73 (d,  $J_{C-F}$  = 22.25 Hz), 151.17-151.20 (d,  $J_{C-F}$  = 3.37 Hz), 145.12-145.17 (d,  $J_{C-F}$  = 5.45 Hz), 136.62, 134.79, 132.71-132.75 (d,  $J_{C-F}$  = 3.40 Hz), 132.60, 132.56, 131.89, 131.77, 130.88, 129.21, 128.55, 125.35, 124.79-124.81 (d,  $J_{C-F}$  = 2.21 Hz), 124.63, 122.58-122.62 (d,  $J_{C-F}$  = 3.18 Hz), 117.60, 115.59, 111.09, 91.77-93.66 (d,  $J_{C-F}$  = 188.81 Hz), 29.60;

**<sup>19</sup>F NMR (376 MHz, DMSO-*d*<sub>6</sub>):**  $\delta$  = -159.87, -159.98;

**HRMS (ESI-TOF)** calcd for C<sub>17</sub>H<sub>12</sub>N<sub>3</sub>O<sub>2</sub>FCl [M + H]<sup>+</sup>: 344.0597; found: 344.0575.

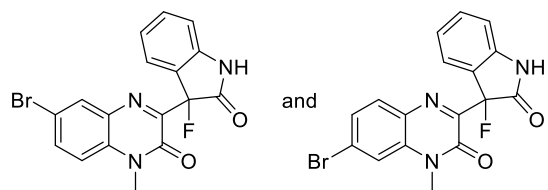

(regioisomeric mixture with 2:1 ratio)

**3-Fluoro-3-(6-bromo-1-methylquinoxalin-2-one) indolin-2-one and 3-fluoro-3-(7-bromo-1-methylquinoxalin-2-one) indolin-2-one (3a1 and 3a2)** was purified by silica column with dichloromethane/methanol = 50:0-20:1, maroon solid, 74.2 mg, 92% yield;

**<sup>1</sup>H NMR (400 MHz, DMSO-*d*<sub>6</sub>):**  $\delta$  = 10.97 (s, 1.59H, NH), 8.24 (d,  $J$  = 2.24 Hz, 1H, ArH), 7.96 (d,  $J$  = 8.56 Hz, 0.49H, ArH), 7.87-7.92 (m, 1.59H, ArH), 7.67 (dd,  $J$  = 1.98, 8.58 Hz, 0.51H, ArH), 7.62 (d,  $J$  = 9.00 Hz, 1.06H, ArH), 7.35-7.40 (m, 1.72H, ArH), 7.16-7.18 (m, 1.77H, ArH), 6.93-6.98 (m, 3.38H, ArH), 3.55 (s, 4.59H, NCH<sub>3</sub>);

**<sup>13</sup>C NMR (100 MHz, DMSO-*d*<sub>6</sub>):**  $\delta$  = 171.13-171.32 (d,  $J_{C-F}$  = 19.48 Hz), 153.40-153.63 (d,  $J_{C-F}$  = 22.28 Hz), 151.89 (d,  $J_{C-F}$  = 3.29 Hz), 145.11-145.17 (d,  $J_{C-F}$  = 5.08 Hz), 134.88, 134.48, 133.12, 133.04, 132.57 (d,  $J_{C-F}$  = 4.00 Hz), 132.19, 131.97, 131.15, 127.66, 125.41, 125.37, 124.81 (d,  $J_{C-F}$  = 1.39 Hz), 124.63 (d,  $J_{C-F}$  = 1.49 Hz), 122.59-122.62 (d,  $J_{C-F}$  = 2.93 Hz), 118.45, 117.85, 116.28, 111.08-111.10 (d,  $J_{C-F}$  = 1.98 Hz), 91.76-93.64 (d,  $J_{C-F}$  = 188.66 Hz), 29.57;

**<sup>19</sup>F NMR (376 MHz, DMSO-*d*<sub>6</sub>):**  $\delta$  = -159.88, -159.98;

**HRMS (ESI-TOF)** calcd for C<sub>17</sub>H<sub>12</sub>N<sub>3</sub>O<sub>2</sub>FBr [M + H]<sup>+</sup>: 388.0091; found: 388.0092.

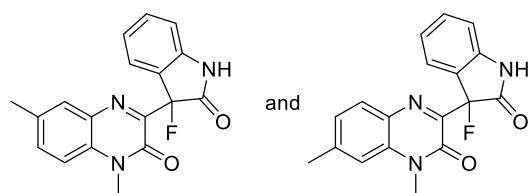

(regioisomeric mixture with 1:2 ratio)

**3-Fluoro-3-(1-methyl-6-methylquinoxalin-2-one) indolin-2-one and 3-fluoro-3-(1-methyl-7-methylquinoxalin-2-one) indolin-2-one (3an1 and 3an2)** was purified by silica column with dichloromethane/methanol = 50:0-20:1, light yellow solid, 67 mg, 98% yield;

**<sup>1</sup>H NMR (400 MHz, DMSO-*d*<sub>6</sub>):**  $\delta$  = 10.92 (s, 1.77H, NH), 7.92 (d,  $J$  = 8.20 Hz, 0.62H, ArH), 7.84-7.85 (m, 1H, ArH), 7.47-7.60 (m, 3.21H, ArH), 7.32-7.39 (m, 2.49H, ArH), 7.14-7.16 (m, 1.86H, ArH), 6.91-6.97 (m, 3.52H, ArH), 3.55 and 3.54 (s, 4.95H, NCH<sub>3</sub>), 2.52 (s, 1.64H, CH<sub>3</sub>), 2.47 (s, 3.20H, CH<sub>3</sub>);

**<sup>13</sup>C NMR (100 MHz, DMSO-*d*<sub>6</sub>):**  $\delta$  = 171.40-171.60 (d,  $J_{C-F}$  = 19.33 Hz), 171.46 (d,  $J_{C-F}$  = 19.18 Hz), 152.16 (d,  $J_{C-F}$  = 2.58 Hz), 151.94-151.97 (d,  $J_{C-F}$  = 3.22 Hz), 150.73-150.95 (d,  $J_{C-F}$  = 22.29 Hz), 145.10-145.16 (d,  $J_{C-F}$  = 5.83 Hz), 142.79, 134.18, 133.22, 132.42-132.46 (d,  $J_{C-F}$  = 3.66 Hz), 132.04, 131.43, 130.37, 130.08, 129.96, 125.91, 125.18, 124.93-125.11 (d,  $J_{C-F}$  = 17.94 Hz), 122.54-122.57 (d,  $J_{C-F}$  = 3.19 Hz), 115.42, 115.36, 111.03, 91.77-93.65 (d,  $J_{C-F}$  = 188.05 Hz), 29.29, 29.23, 22.07, 20.58;

**<sup>19</sup>F NMR (376 MHz, DMSO-*d*<sub>6</sub>):**  $\delta$  = -160.05, -160.06;

**HRMS (ESI-TOF)** calcd for C<sub>18</sub>H<sub>15</sub>N<sub>3</sub>O<sub>2</sub>F [M + H]<sup>+</sup>: 324.1143; found: 324.1124.

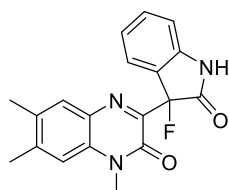

**3-Fluoro-3-(1-methyl-6,7-dimethylquinoxalin-2-one) indolin-2-one (3ao)** was purified by silica column with dichloromethane/methanol = 50:0-20:1, light yellow solid, 73 mg, 100% yield;

**<sup>1</sup>H NMR (400 MHz, DMSO-*d*<sub>6</sub>):**  $\delta$  = 10.90 (s, 1.77H, NH), 7.81 (s, 1H, ArH), 7.46 (s, 1H, ArH), 7.34-7.38 (m, 1H, ArH), 7.12-7.15 (m, 1H, ArH), 6.91-6.96 (m, 2H, ArH), 3.54 (m, 3H, ArH), 3.54 (m, 3H, NCH<sub>3</sub>), 2.43 (s, 3H, CH<sub>3</sub>), 2.37 (s, 3H, CH<sub>3</sub>);

**<sup>13</sup>C NMR (100 MHz, DMSO-*d*<sub>6</sub>):**  $\delta$  = 171.53-171.72 (d,  $J_{C-F}$  = 19.35 Hz), 152.04-152.08 (d,  $J_{C-F}$  = 3.51 Hz), 150.66-150.88 (d,  $J_{C-F}$  = 22.33 Hz), 145.07-145.12 (d,  $J_{C-F}$  = 5.49 Hz), 142.07, 133.48, 132.36-132.39 (d,  $J_{C-F}$  = 3.68 Hz), 131.61, 130.56, 130.13, 125.11, 125.05-125.23 (d,  $J_{C-F}$  = 17.98 Hz), 122.52-122.52 (d,  $J_{C-F}$  = 3.09 Hz), 115.72, 111.01, 91.75-93.62 (d,  $J_{C-F}$  = 187.61 Hz), 29.21, 20.53, 19.15;

**<sup>19</sup>F NMR (376 MHz, DMSO-*d*<sub>6</sub>):**  $\delta$  = -160.11;

**HRMS (ESI-TOF)** calcd for C<sub>19</sub>H<sub>17</sub>N<sub>3</sub>O<sub>2</sub>F [M + H]<sup>+</sup>: 338.1299; found: 338.1280.

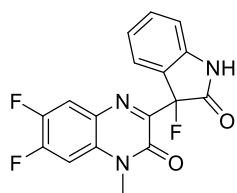

**3-Fluoro-3-(1-methyl-6, 7-difluoroquinoxalin-2-one) indolin-2-one (3ap)** was purified by silica column with dichloromethane/methanol = 50:0-20:1, white solid, 50.7 mg, 73% yield;

**<sup>1</sup>H NMR (400 MHz, DMSO-*d*<sub>6</sub>):**  $\delta$  = 10.97 (s, 1.77H, NH), 8.21 (dd, *J* = 8.34, 10.74 Hz, 1H, ArH), 7.87 (dd, *J* = 7.48, 12.36 Hz, 1H, ArH), 7.35-7.40 (m, 1H, ArH), 7.15-7.17 (m, 1H, ArH), 6.92-6.97 (m, 2H, ArH), 3.53 (s, 3H, NCH<sub>3</sub>);

**<sup>13</sup>C NMR (100 MHz, DMSO-*d*<sub>6</sub>):**  $\delta$  = 171.11-171.31 (d, *J*<sub>C-F</sub> = 19.37 Hz), 150.55-153.05 (dd, *J*<sub>C-F</sub> = 14.51, 249.44 Hz), 152.63-152.85 (d, *J*<sub>C-F</sub> = 22.38 Hz), 151.83-151.86 (d, *J*<sub>C-F</sub> = 3.28 Hz), 145.39-147.82 (dd, *J*<sub>C-F</sub> = 14.39, 242.99 Hz), 145.09-145.14 (d, *J*<sub>C-F</sub> = 5.47 Hz), 132.59-132.56 (d, *J*<sub>C-F</sub> = 3.81 Hz), 131.62-131.72 (d, *J*<sub>C-F</sub> = 9.88 Hz), 128.61-128.71 (dd, *J*<sub>C-F</sub> = 2.38, 9.98 Hz), 125.34, 124.60-124.77 (d, *J*<sub>C-F</sub> = 17.72 Hz), 122.59-122.62 (d, *J*<sub>C-F</sub> = 3.22 Hz), 117.93-118.11 (d, *J*<sub>C-F</sub> = 18.34 Hz), 111.09, 104.77-105.01 (d, *J*<sub>C-F</sub> = 23.42 Hz), 91.73-93.62 (d, *J*<sub>C-F</sub> = 188.60 Hz), 30.13;

**<sup>19</sup>F NMR (376 MHz, DMSO-*d*<sub>6</sub>):**  $\delta$  = -130.57 (d, *J*<sub>C-F</sub> = 23.76 Hz), -142.43 (d, *J*<sub>C-F</sub> = 23.84 Hz), -159.91;

**HRMS (ESI-TOF)** calcd for C<sub>17</sub>H<sub>11</sub>N<sub>3</sub>O<sub>2</sub>F<sub>3</sub> [M + H]<sup>+</sup>: 346.0798; found: 346.0778.

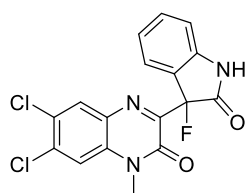

**3-Fluoro-3-(1-methyl-6, 7-dichloroquinoxalin-2-one) indolin-2-one (3aq)** was purified by silica column with dichloromethane/methanol = 50:0-20:1, yellow solid, 57.7 mg, 75% yield;

**<sup>1</sup>H NMR (400 MHz, DMSO-*d*<sub>6</sub>):**  $\delta$  = 11.08 (s, 1H, NH), 8.32 (s, 1H, ArH), 7.97 (s, 1H, ArH), 7.35-7.40 (m, 1H, ArH), 7.15-7.18 (m, 1H, ArH), 6.93-6.99 (m, 2H, ArH), 3.54 (s, 3H, NCH<sub>3</sub>);

**<sup>13</sup>C NMR (100 MHz, DMSO-*d*<sub>6</sub>):**  $\delta$  = 170.97-171.17 (d, *J*<sub>C-F</sub> = 19.40 Hz), 153.67-153.89 (d, *J*<sub>C-F</sub> = 22.41 Hz), 151.76-151.79 (d, *J*<sub>C-F</sub> = 3.53 Hz), 145.14-145.20 (d, *J*<sub>C-F</sub> = 5.80 Hz), 134.35, 133.65, 132.60-132.64 (d, *J*<sub>C-F</sub> = 3.73 Hz), 131.50, 131.02, 126.69, 125.39, 124.50-124.67 (d, *J*<sub>C-F</sub> = 17.74 Hz), 122.58-122.61 (d, *J*<sub>C-F</sub> = 3.27 Hz), 117.59, 111.17, 91.78-93.67 (d, *J*<sub>C-F</sub> = 188.99 Hz), 29.85;

**<sup>19</sup>F NMR (376 MHz, DMSO-*d*<sub>6</sub>):**  $\delta$  = -159.83;

**HRMS (ESI-TOF)** calcd for C<sub>17</sub>H<sub>11</sub>N<sub>3</sub>O<sub>2</sub>FCl<sub>2</sub> [M + H]<sup>+</sup>: 378.0207; found: 378.0197.

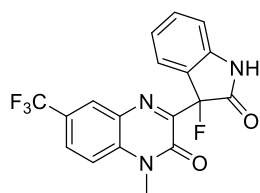

**3-Fluoro-3-(1-methyl-6-trifluoromethyl-2-one) indolin-2-one (3ar)** was purified by silica column with dichloromethane/methanol = 50:0-20:1, maroon solid, 49.2 mg, 64% yield;

**<sup>1</sup>H NMR (400 MHz, DMSO-*d*<sub>6</sub>):**  $\delta$  = 11.01 (s, 1H, NH), 8.25 (dd, *J* = 0.98, 8.46 Hz, 1H, ArH),

7.95 (d,  $J = 1.84$  Hz, 1H, ArH), 7.82 (dd,  $J = 1.84, 8.48$  Hz, 1H, ArH), 7.36-7.41 (m, 1H, ArH), 7.18-7.20 (m, 1H, ArH), 6.93-6.99 (m, 2H, ArH), 3.62 (s, 3H, NCH<sub>3</sub>);

**<sup>13</sup>C NMR (100 MHz, DMSO-*d*<sub>6</sub>):**  $\delta = 171.01$ - $171.20$  (d,  $J_{C-F} = 19.34$  Hz),  $154.82$ - $155.04$  (d,  $J_{C-F} = 22.24$  Hz),  $151.97$ - $152.00$  (d,  $J_{C-F} = 3.59$  Hz),  $145.13$ - $145.18$  (d,  $J_{C-F} = 5.55$  Hz),  $134.05$ ,  $133.99$ ,  $132.63$ - $132.67$  (d,  $J_{C-F} = 3.67$  Hz),  $131.58$ ,  $131.20$ - $131.52$  (d,  $J_{C-F} = 32.04$  Hz),  $125.45$ ,  $124.51$ - $124.68$  (d,  $J_{C-F} = 17.76$  Hz),  $122.80$ - $125.52$  (d,  $J_{C-F} = 271.41$  Hz),  $122.62$ - $122.65$  (d,  $J_{C-F} = 3.17$  Hz),  $120.77$ ,  $113.33$ - $113.37$  (d,  $J_{C-F} = 4.09$  Hz),  $111.14$ ,  $91.83$ - $93.72$  (d,  $J_{C-F} = 189.04$  Hz),  $29.65$ ;

**<sup>19</sup>F NMR (376 MHz, DMSO-*d*<sub>6</sub>):**  $\delta = -60.76, -159.89$ ;

**HRMS (ESI-TOF)** calcd for C<sub>18</sub>H<sub>11</sub>N<sub>3</sub>O<sub>2</sub>F<sub>4</sub> [M + H]<sup>+</sup>: 378.0860; found: 378.0839.

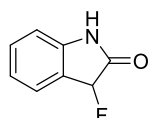

**3-Fluoro-2-oxindole (4a)**<sup>[3]</sup> black solid, 53.6 mg;

**<sup>1</sup>H NMR (400 MHz, DMSO-*d*<sub>6</sub>):**  $\delta = 10.63$  (s, 1H, NH), 7.45 (d,  $J = 7.48$  Hz, 1H, ArH), 7.95 (t,  $J = 7.76$  Hz, 1H, ArH), 7.03 (t,  $J = 7.02$  Hz, 1H, ArH), 6.88 (d,  $J = 7.80$  Hz, 1H, ArH), 5.93 (d,  $J_{H-F} = 50.52$  Hz, 1H, CH);

**<sup>13</sup>C NMR (100 MHz, DMSO-*d*<sub>6</sub>):**  $\delta = 172.75$ - $172.92$  (d,  $J_{C-F} = 17.39$  Hz),  $143.76$ - $143.82$  (d,  $J_{C-F} = 5.83$  Hz),  $131.77$ - $131.80$  (d,  $J_{C-F} = 3.65$  Hz),  $126.62$ ,  $123.74$ - $123.90$  (d,  $J_{C-F} = 15.91$  Hz),  $122.63$ - $122.66$  (d,  $J_{C-F} = 3.21$  Hz),  $110.80$ - $110.82$  (d,  $J_{C-F} = 1.71$  Hz),  $85.63$ - $87.45$  (d,  $J_{C-F} = 181.41$  Hz);

**<sup>19</sup>F NMR (376 MHz, DMSO-*d*<sub>6</sub>):**  $\delta = -192.05$ .

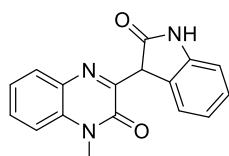

**3-(2-Hydroxy-1H-indol-3-yl)-1-methylquinoxalin-2-one (5a)**<sup>[4]</sup> orange solid, 64 mg;

**<sup>1</sup>H NMR (400 MHz, DMSO-*d*<sub>6</sub>):**  $\delta = 14.50$  (s, 1H),  $10.94$  (s, 1H),  $8.70$  (dd,  $J = 1.16, 8.00$  Hz, 1H),  $7.35$ - $7.37$  (m, 1H),  $7.26$ - $7.29$  (m, 1H),  $7.16$ - $7.20$  (m, 2H),  $7.05$  (dt,  $J = 1.26, 7.50$  Hz, 1H),  $6.88$ - $6.95$  (m, 2H),  $3.58$  (s, 3H);

**<sup>13</sup>C NMR (100 MHz, DMSO-*d*<sub>6</sub>):**  $\delta = 172.20, 156.43, 140.23, 137.49, 128.75, 125.91, 125.63, 125.17, 124.54, 124.04, 123.01, 121.01, 116.47, 115.28, 109.52, 97.82, 30.03$ .

## 7. Reference

- [1] W. L. F. Armarego, C. Chai, in *Purification of Laboratory Chemicals (Seventh Edition)*, Butterworth-Heinemann, Boston, **2013**, pp. 103-554.
- [2] J. Zhou, Q. Ren, N. Xu, C. Wang, S. Song, Z. Chen, J. Li, *Green Chem.* **2021**, *23*, 5753-5758.
- [3] Q. Yang, G.-L. Dai, Y.-M. Yang, Z. Luo, Z.-Y. Tang, *J. Org. Chem.* **2018**, *83*, 6762-6768.
- [4] Y.-Y. Han, Z.-J. Wu, X.-M. Zhang, W.-C. Yuan, *Tetrahedron Lett.* **2010**, *51*, 2023-2028.

## 8. Copies of $^1\text{H}/^{13}\text{C}$ NMR and HR-ESI-MS Spectra

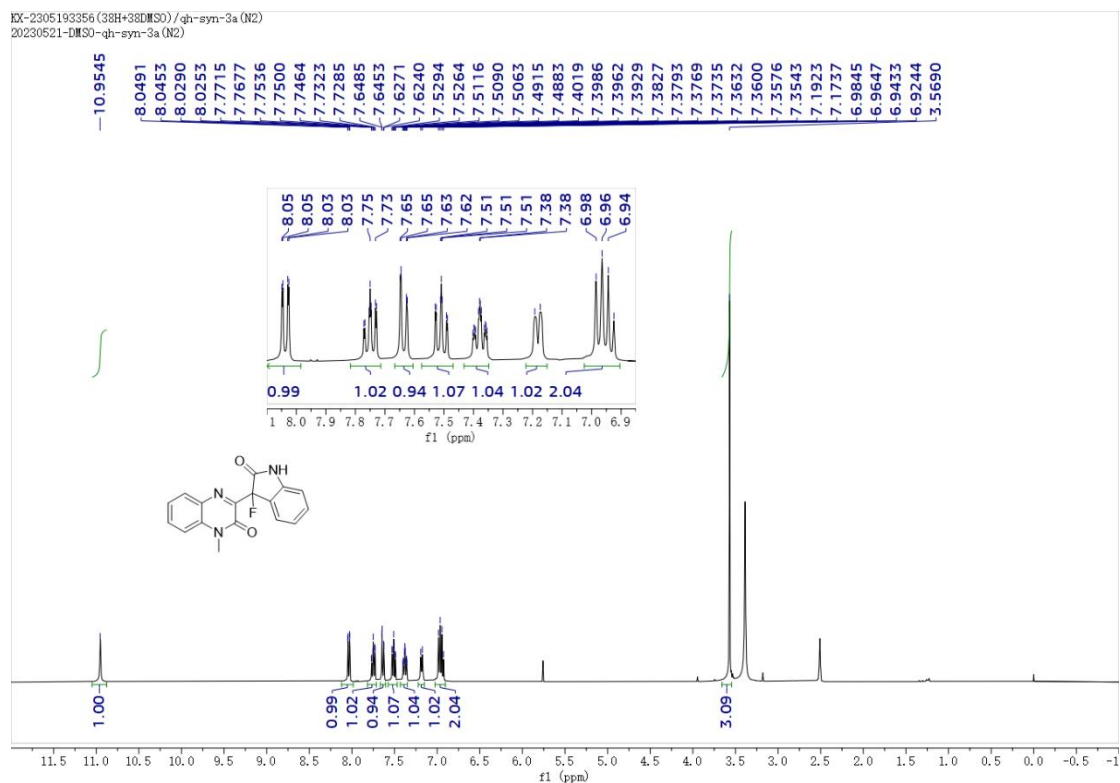

Figure S1. The  $^1\text{H}$  NMR Spectrum of Compound 3a in  $\text{DMSO}-d_6$

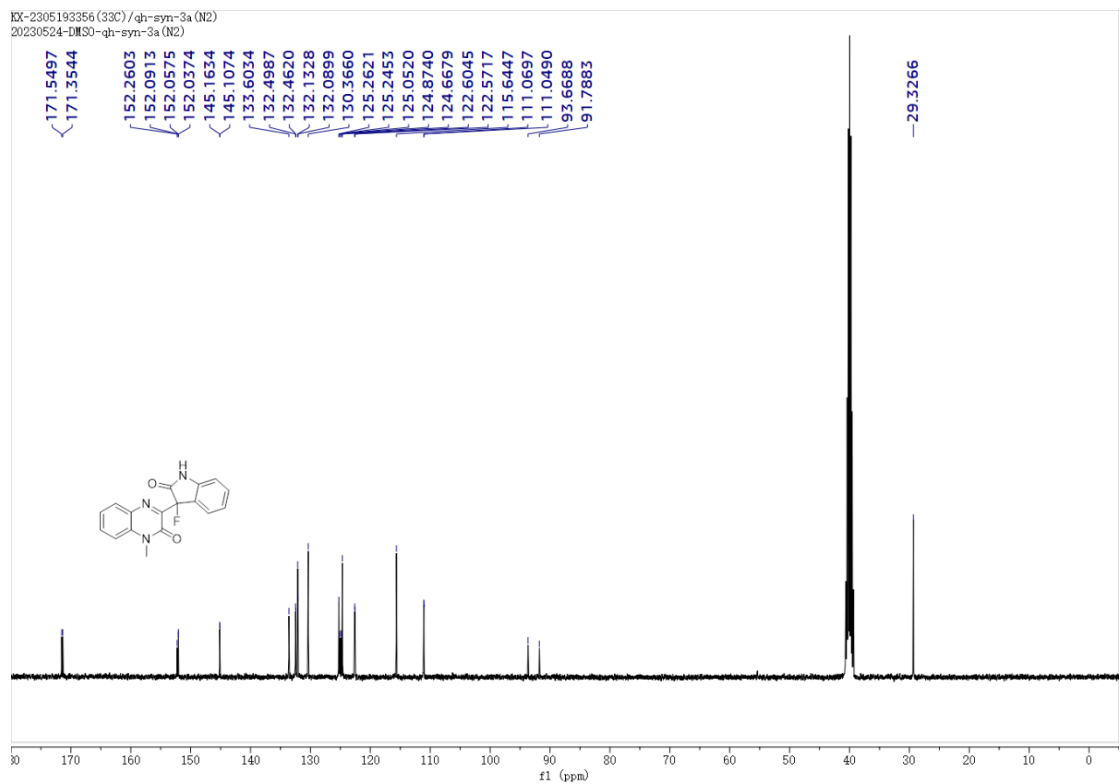

Figure S2. The  $^{13}\text{C}$  NMR Spectrum of Compound 3a in  $\text{DMSO}-d_6$

KX-2305193356 (29F) / qh-syn-3a (N2)  
20230524-DMSO-qh-syn-3a (N2)

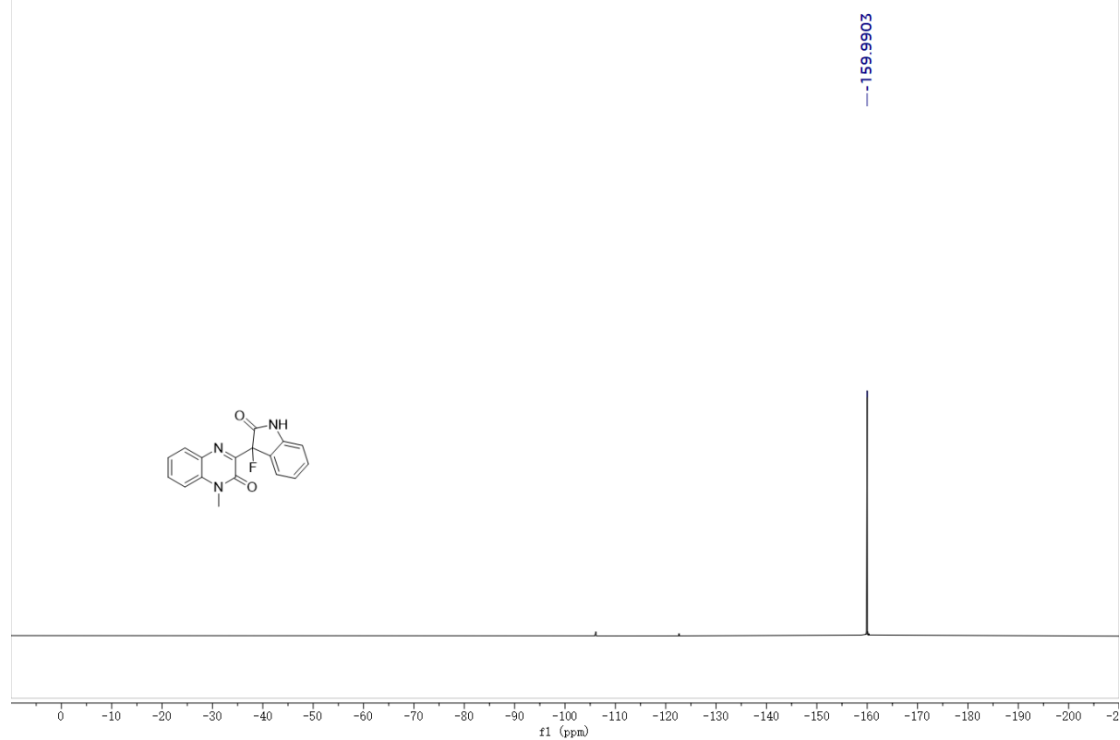

**Figure S3.** The  $^{19}\text{F}$  NMR Spectrum of Compound **3a** in  $\text{DMSO-}d_6$

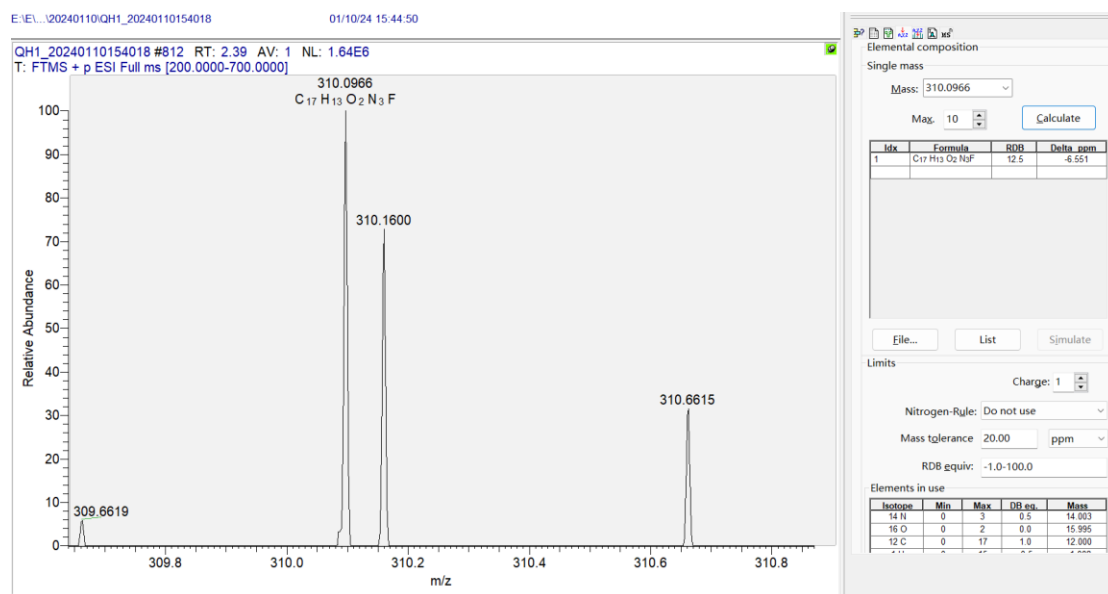

**Figure S4.** The HR-ESI-MS Spectrum of Compound **3a**

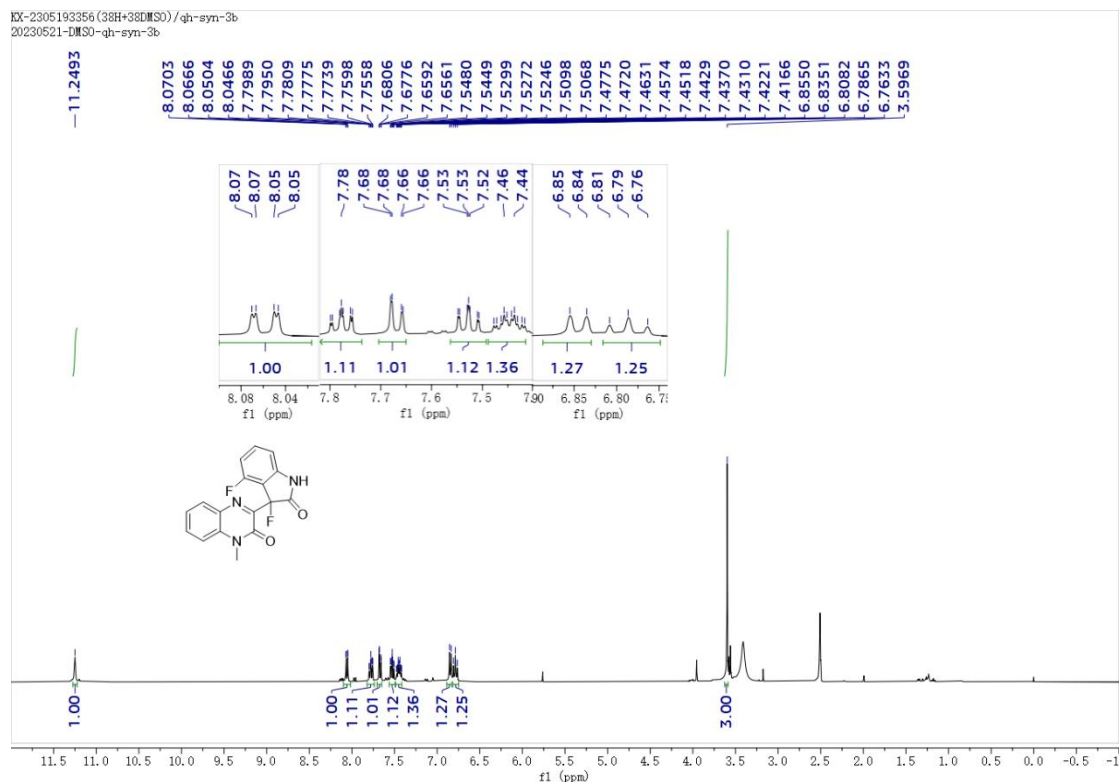

**Figure S5** The  $^1\text{H}$  NMR Spectrum of Compound **3b** in  $\text{DMSO}-d_6$

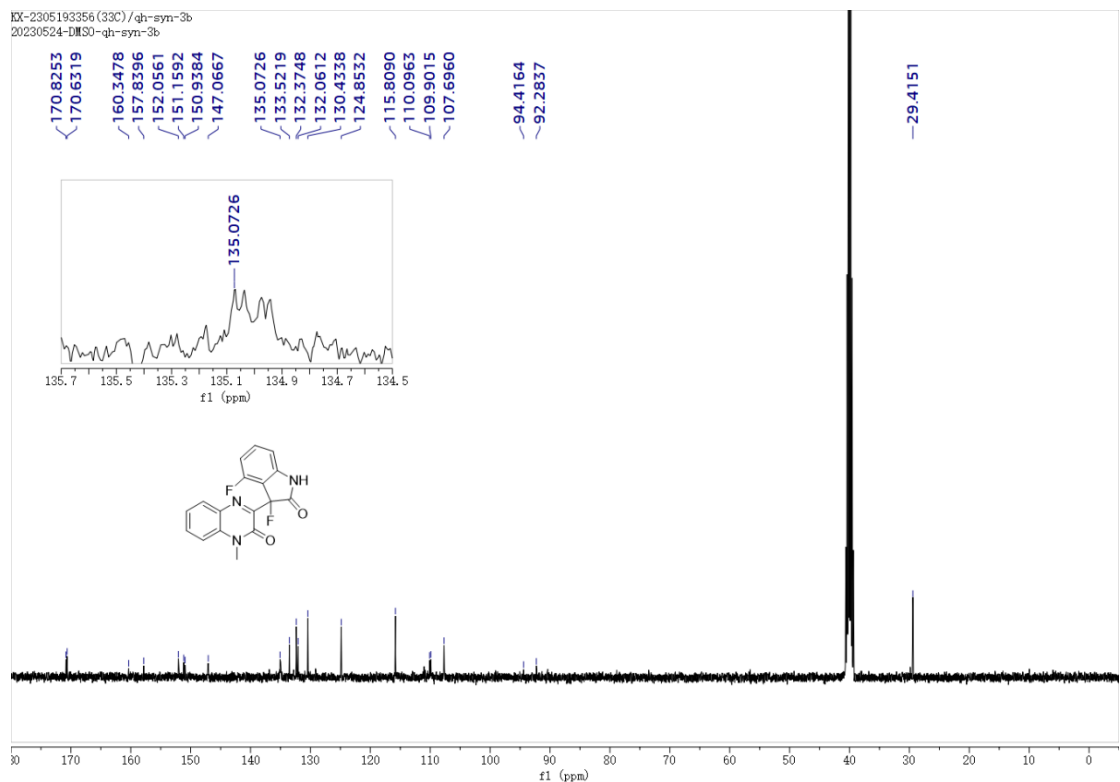

**Figure S6.** The  $^{13}\text{C}$  NMR Spectrum of Compound **3b** in  $\text{DMSO}-d_6$

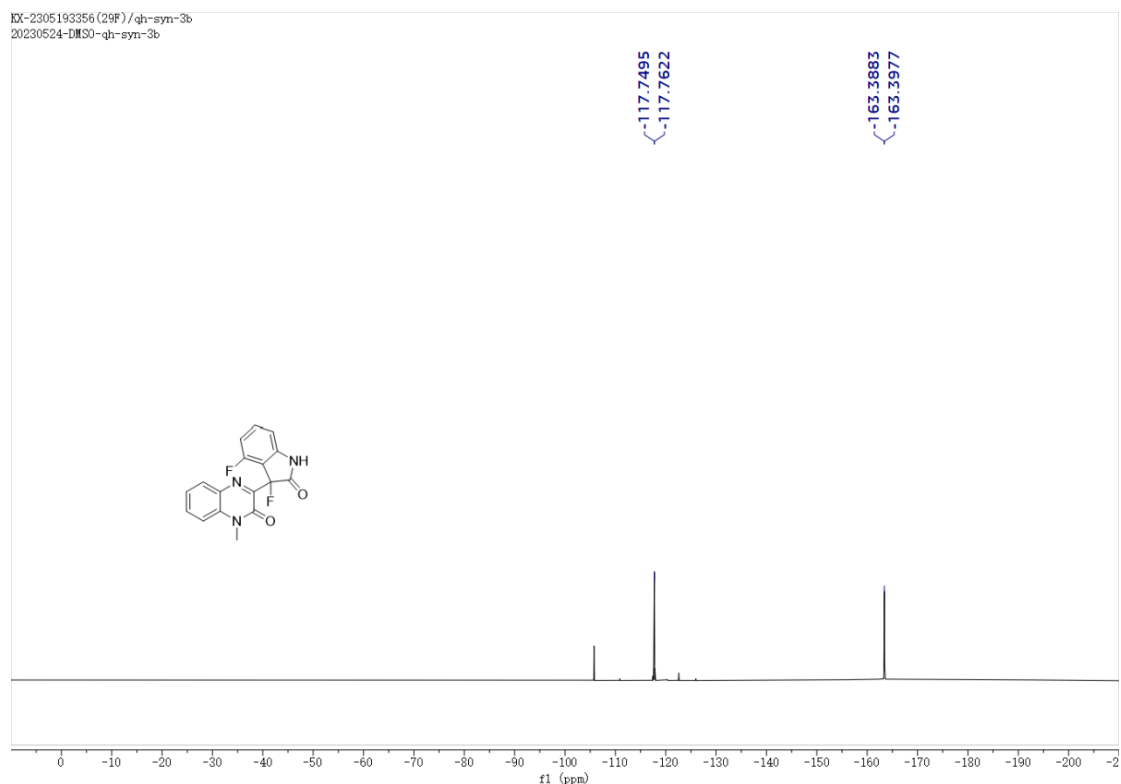

**Figure S7.** The  $^{19}\text{F}$  NMR Spectrum of Compound **3b** in  $\text{DMSO-}d_6$

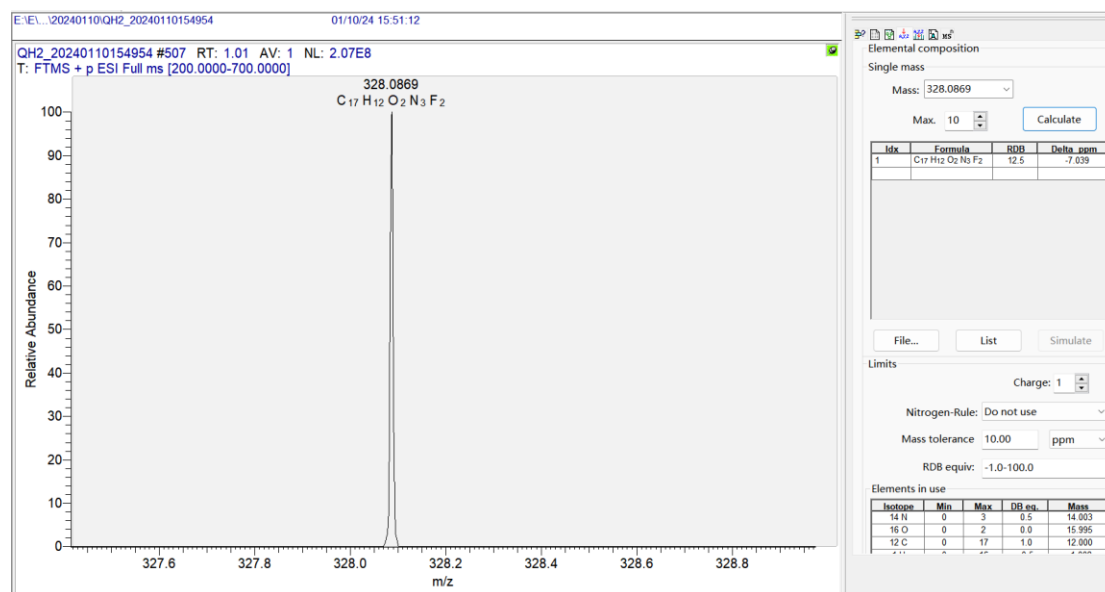

**Figure S8.** The HR-ESI-MS Spectrum of Compound **3b**



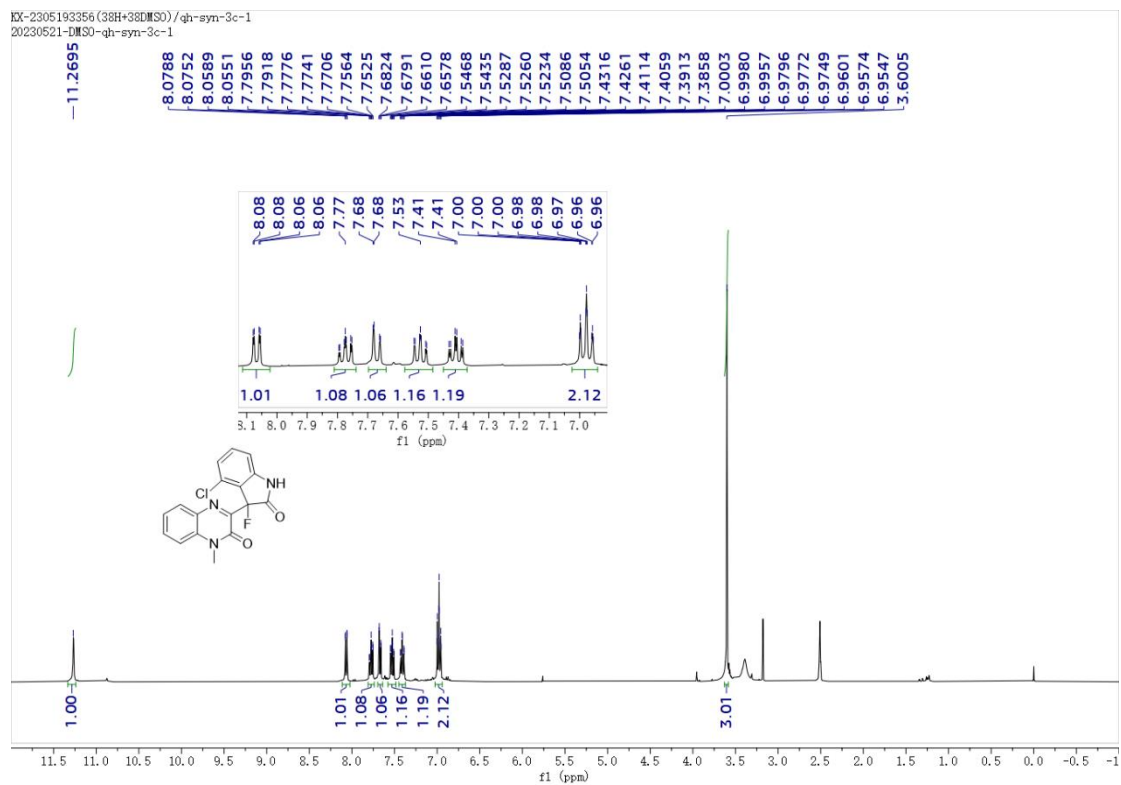

Figure S9. The <sup>1</sup>H NMR Spectrum of Compound 3c in DMSO-*d*<sub>6</sub>

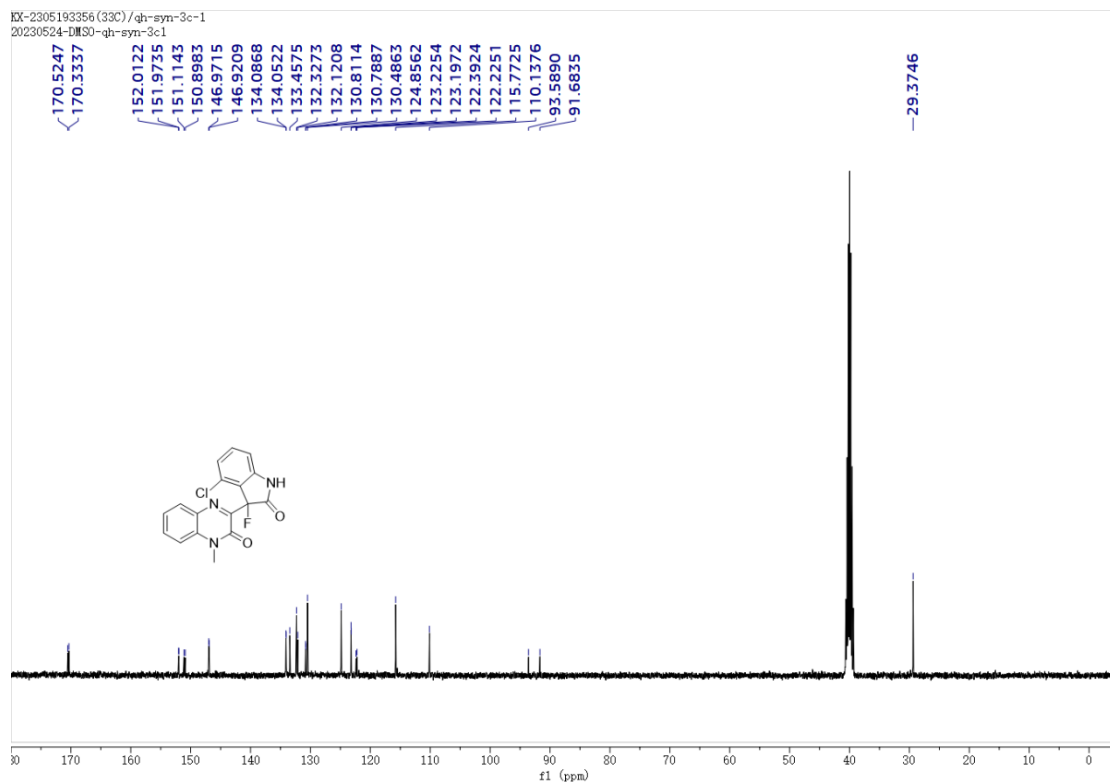

Figure S10. The <sup>13</sup>C NMR Spectrum of Compound 3c in DMSO-*d*<sub>6</sub>

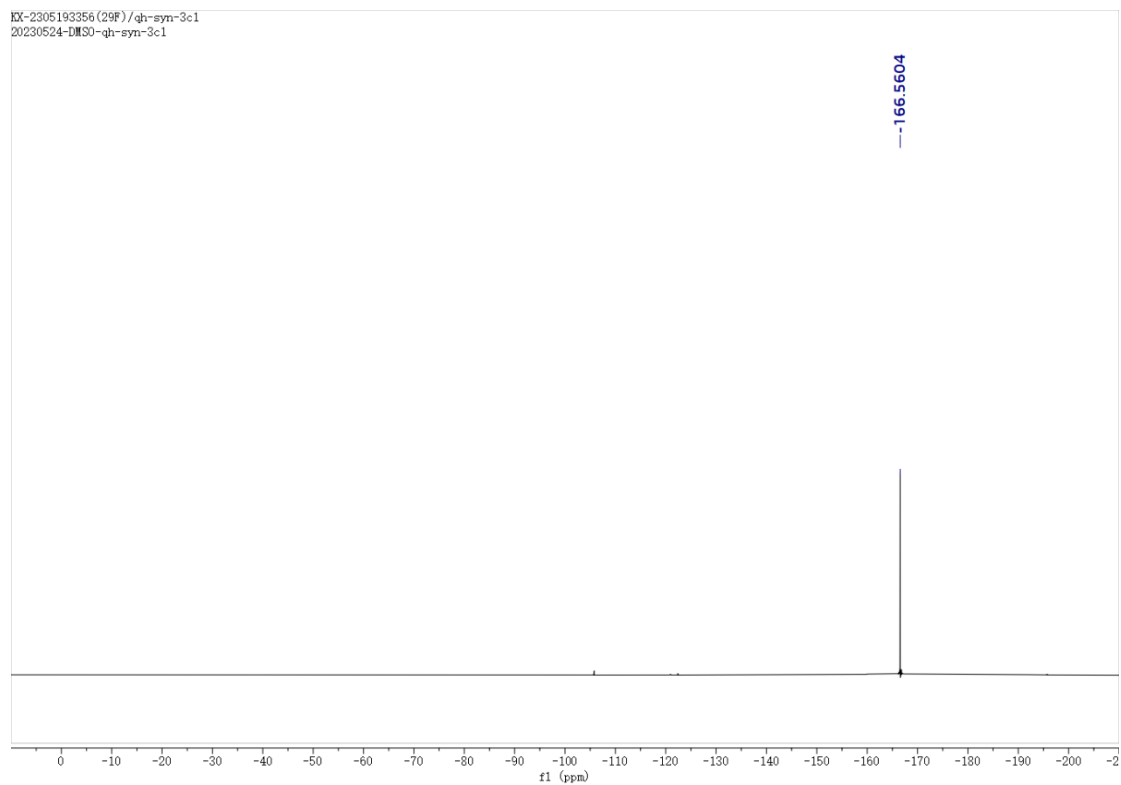

**Figure S11.** The  $^{19}\text{F}$  NMR Spectrum of Compound **3c** in  $\text{DMSO}-d_6$

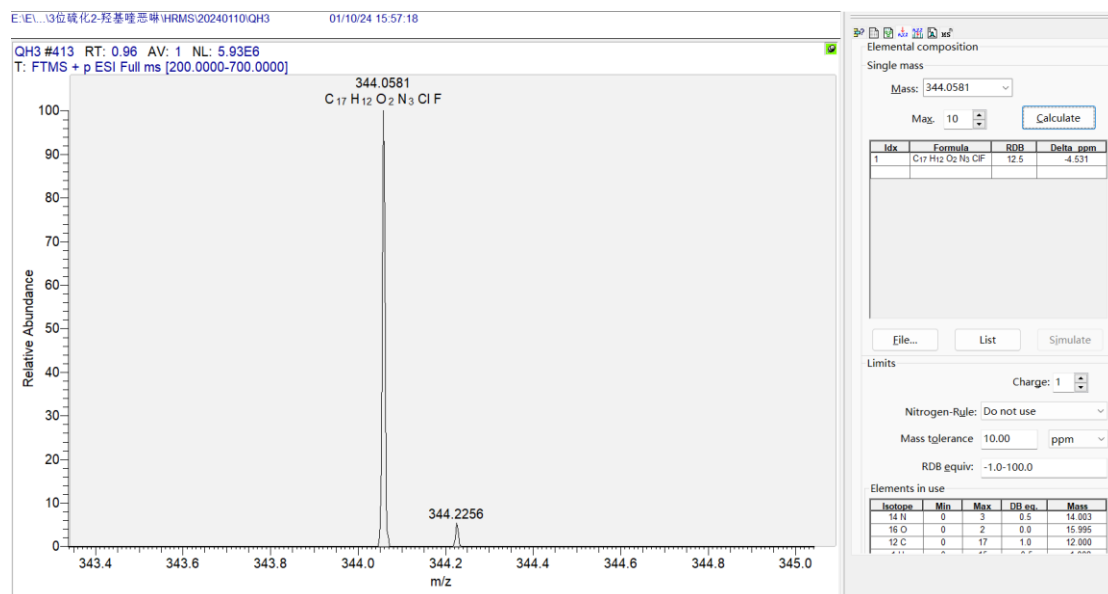

**Figure S12.** The HR-ESI-MS Spectrum of Compound **3c**

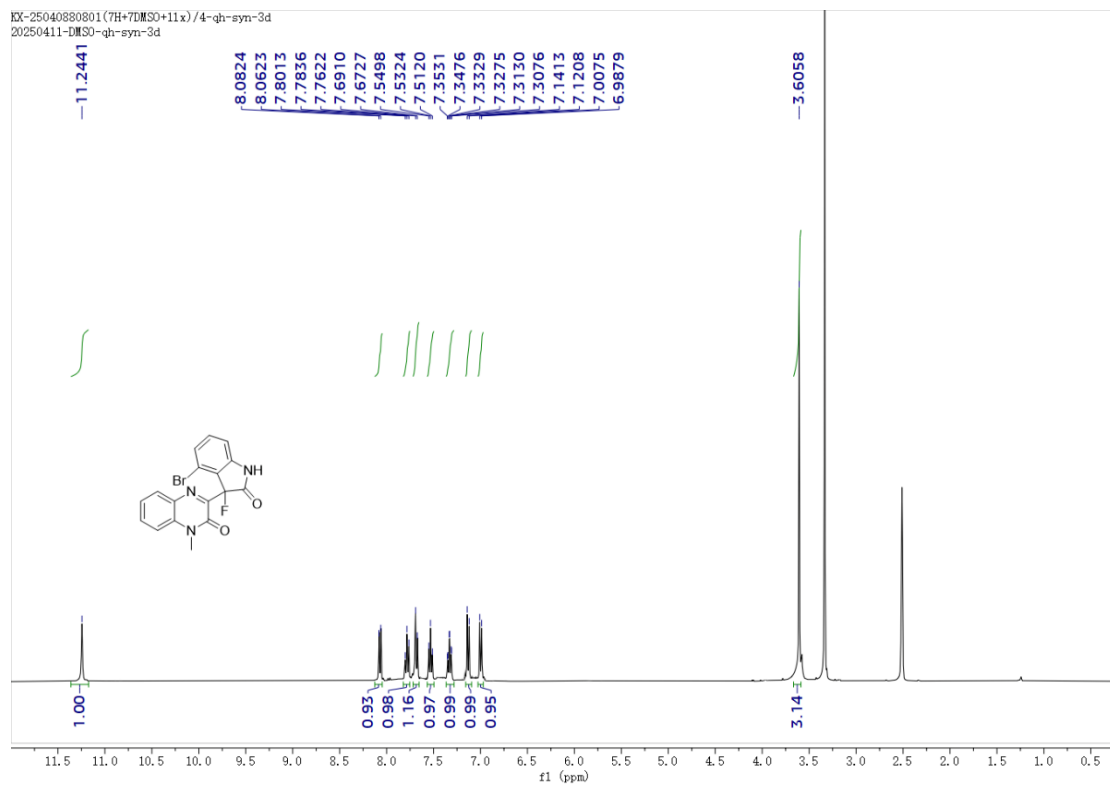

**Figure S13.** The <sup>1</sup>H NMR Spectrum of Compound 3d in DMSO-*d*<sub>6</sub>

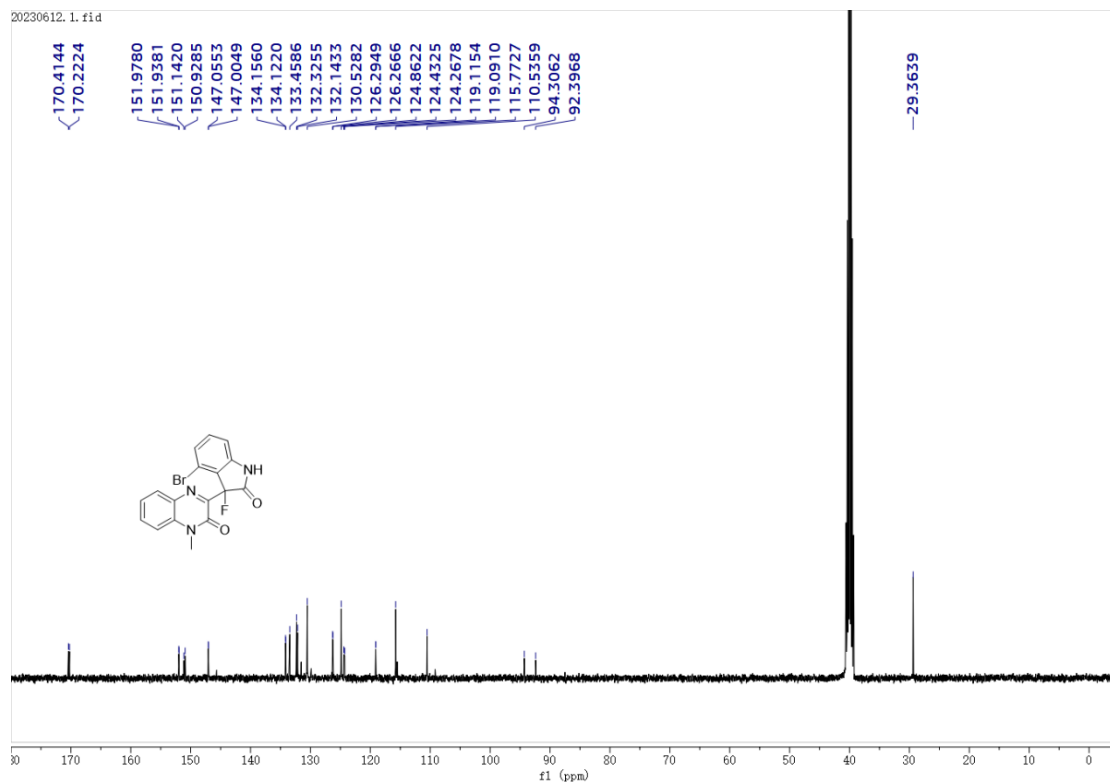

**Figure S14.** The <sup>13</sup>C NMR Spectrum of Compound 3d in DMSO-*d*<sub>6</sub>

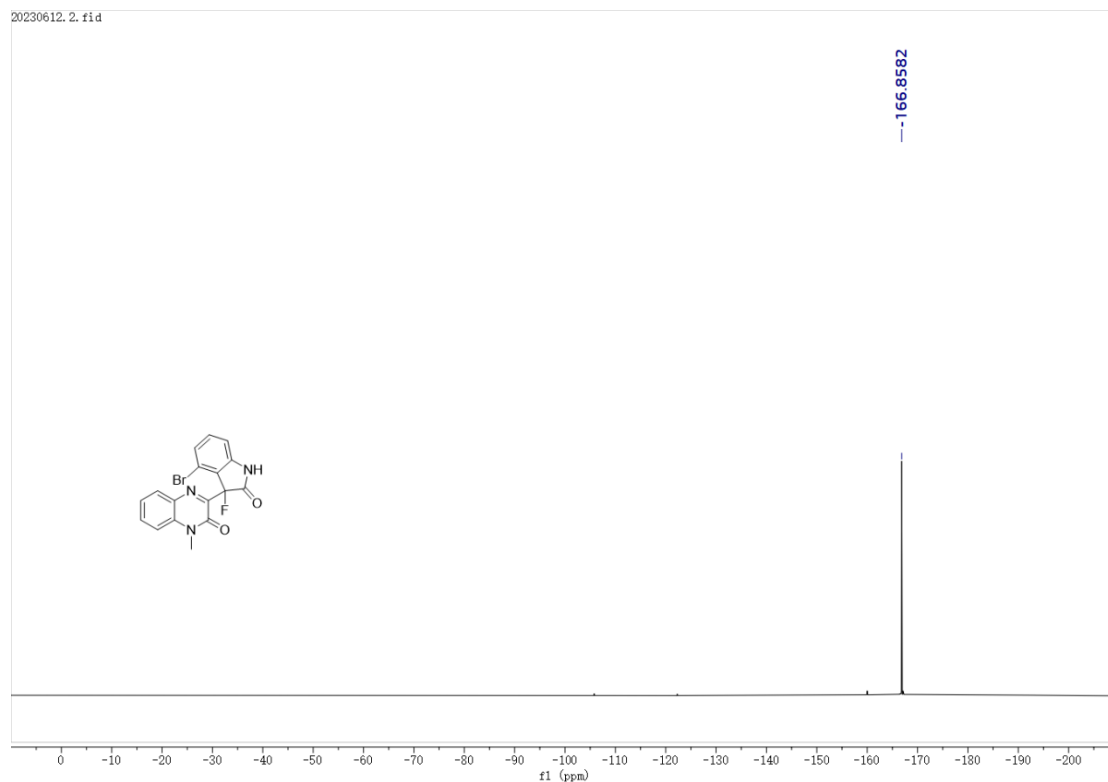

**Figure S15.** The  $^{19}\text{F}$  NMR Spectrum of Compound **3d** in  $\text{DMSO-}d_6$

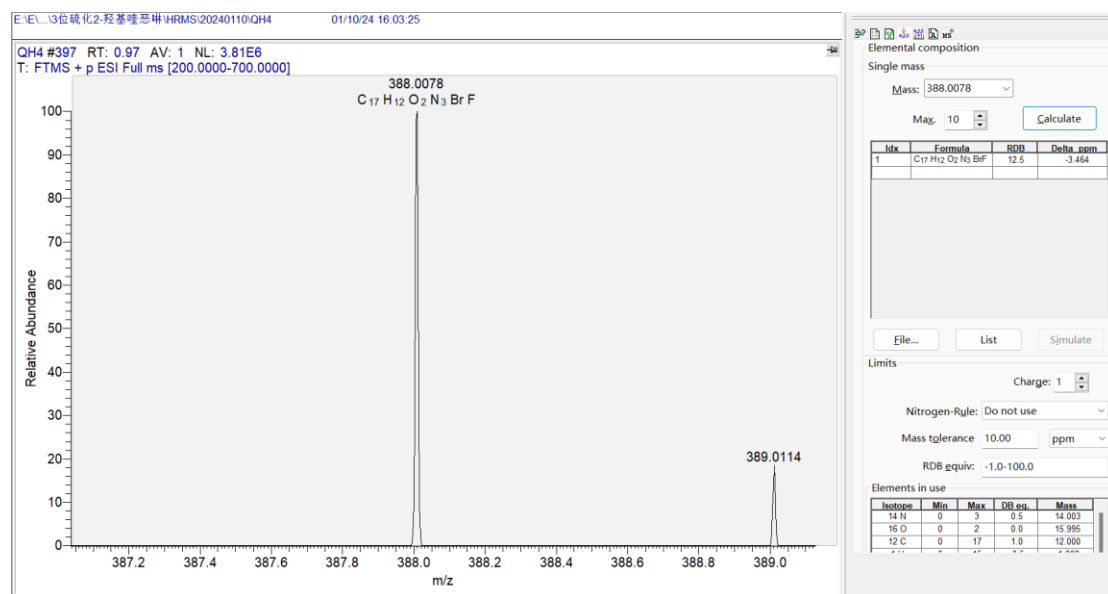

**Figure S16.** The HR-ESI-MS Spectrum of Compound **3d**

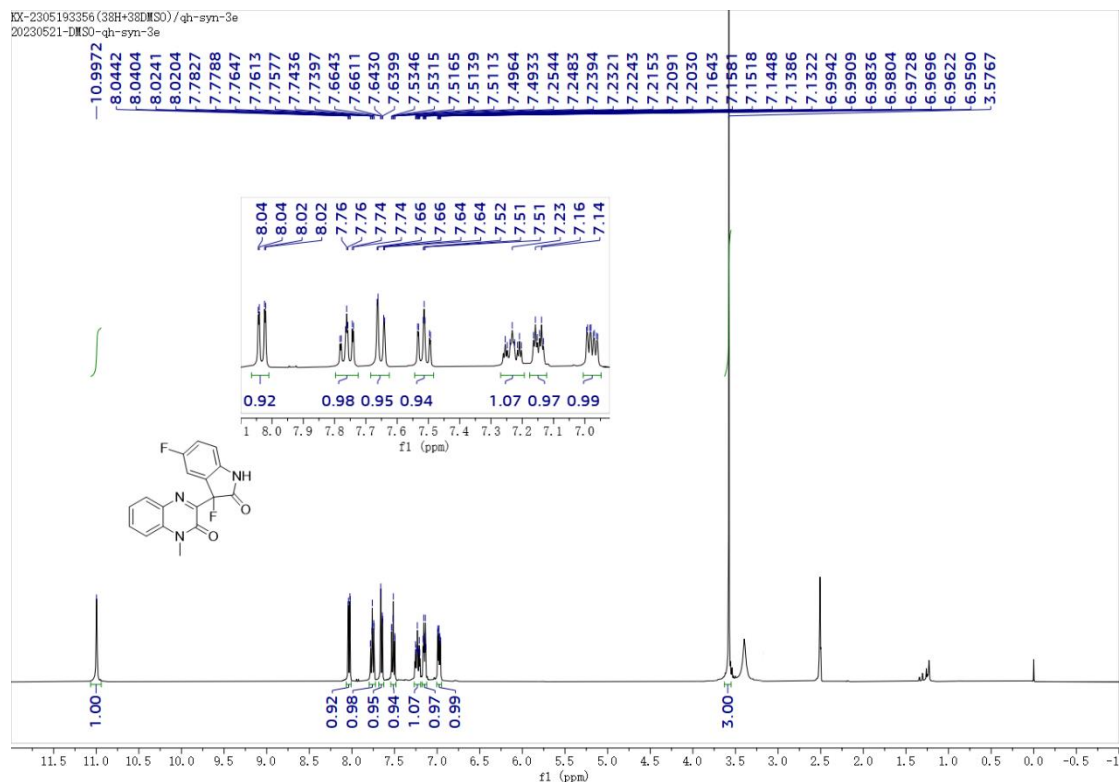

**Figure S17.** The <sup>1</sup>H NMR Spectrum of Compound 3e in DMSO-*d*<sub>6</sub>

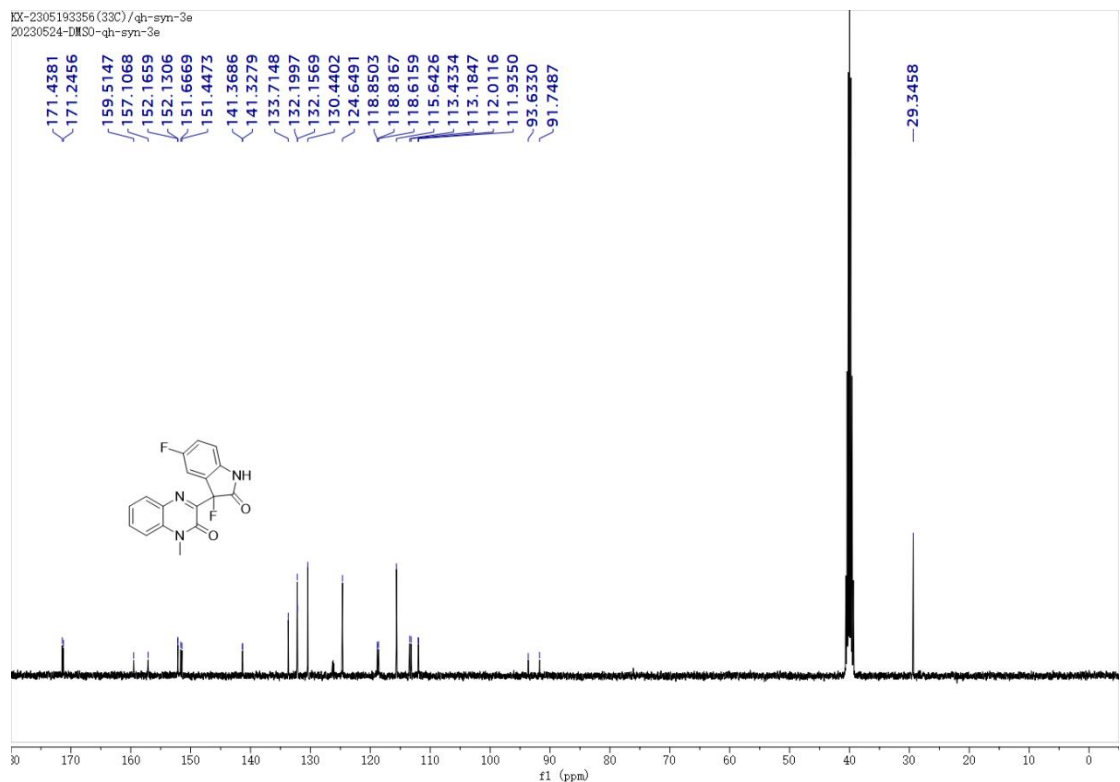

**Figure S18.** The <sup>13</sup>C NMR Spectrum of Compound 3e in DMSO-*d*<sub>6</sub>

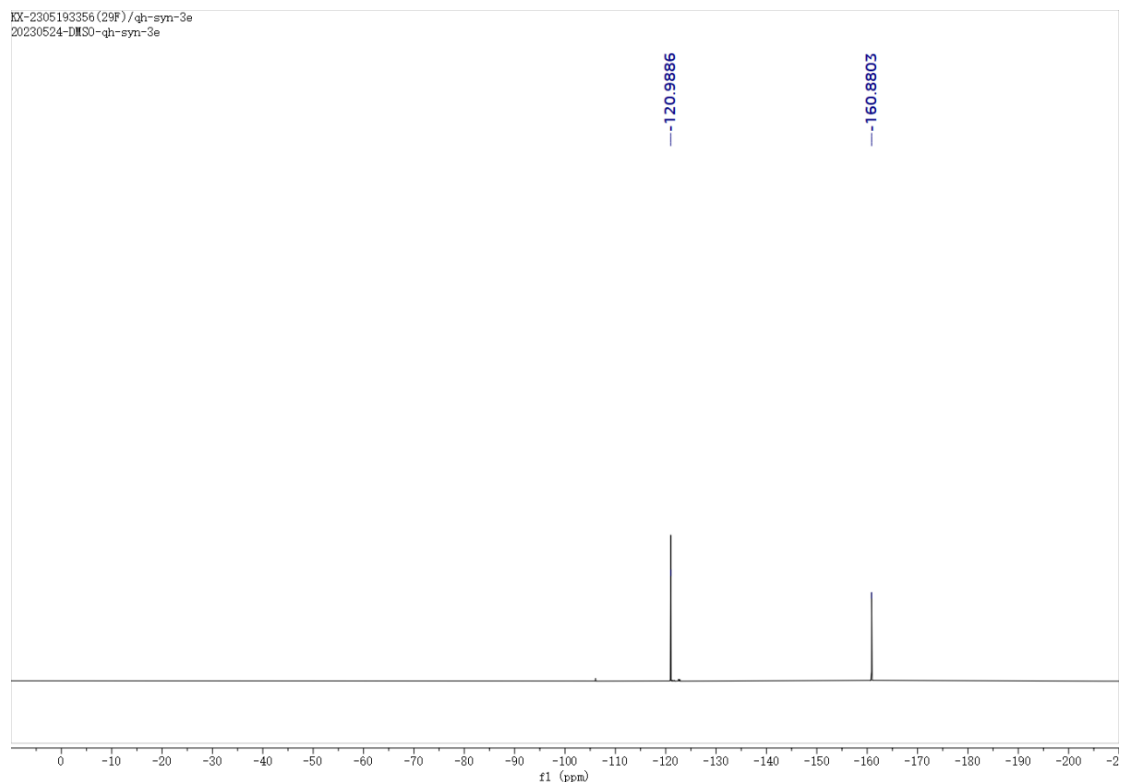

**Figure S19.** The  $^{19}\text{F}$  NMR Spectrum of Compound **3e** in  $\text{DMSO-}d_6$

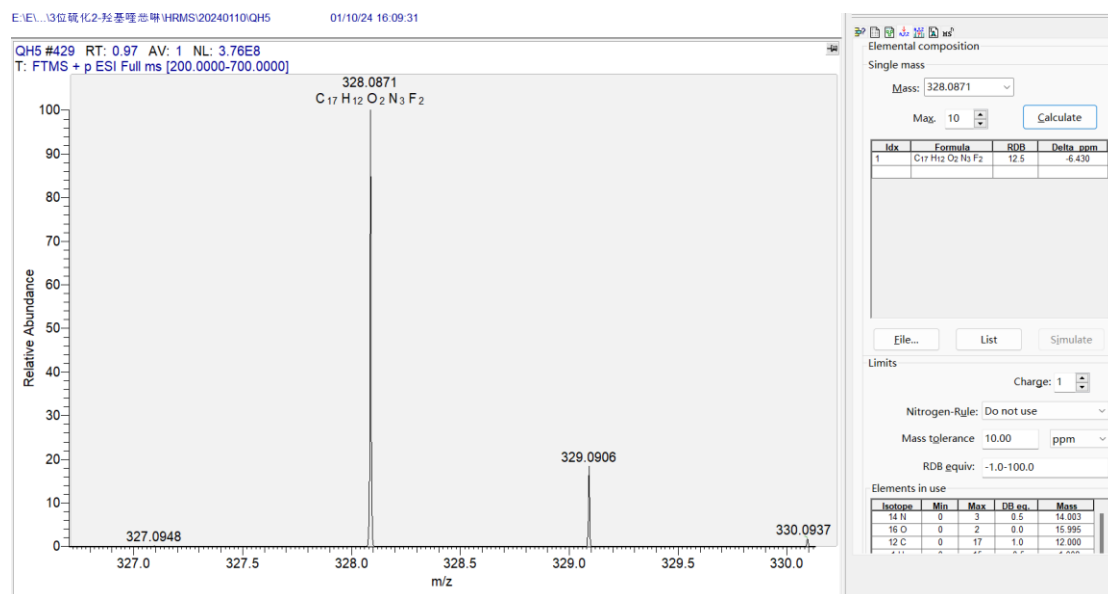

**Figure S20.** The HR-ESI-MS Spectrum of Compound **3e**

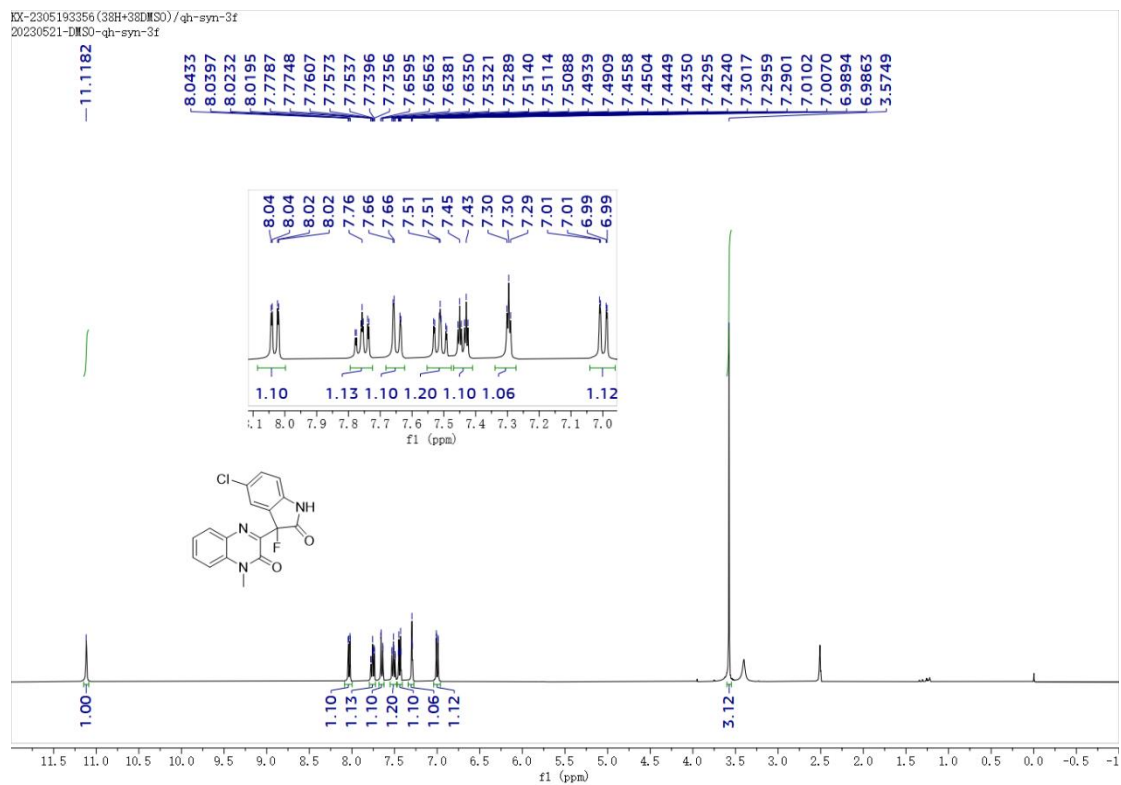

**Figure S21.** The <sup>1</sup>H NMR Spectrum of Compound **3f** in DMSO-*d*<sub>6</sub>

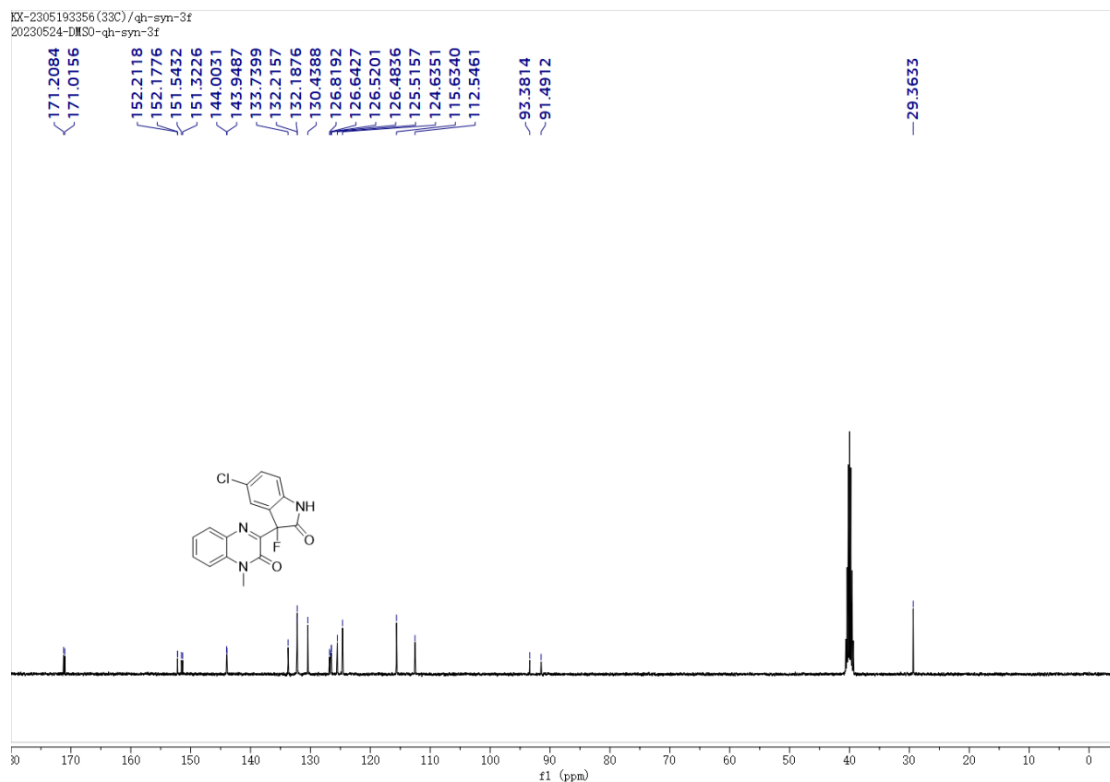

**Figure S22.** The <sup>13</sup>C NMR Spectrum of Compound **3f** in DMSO-*d*<sub>6</sub>

KX-2305193356 (29F) / qh-syn-3f  
20230524-DMSO-qh-syn-3f

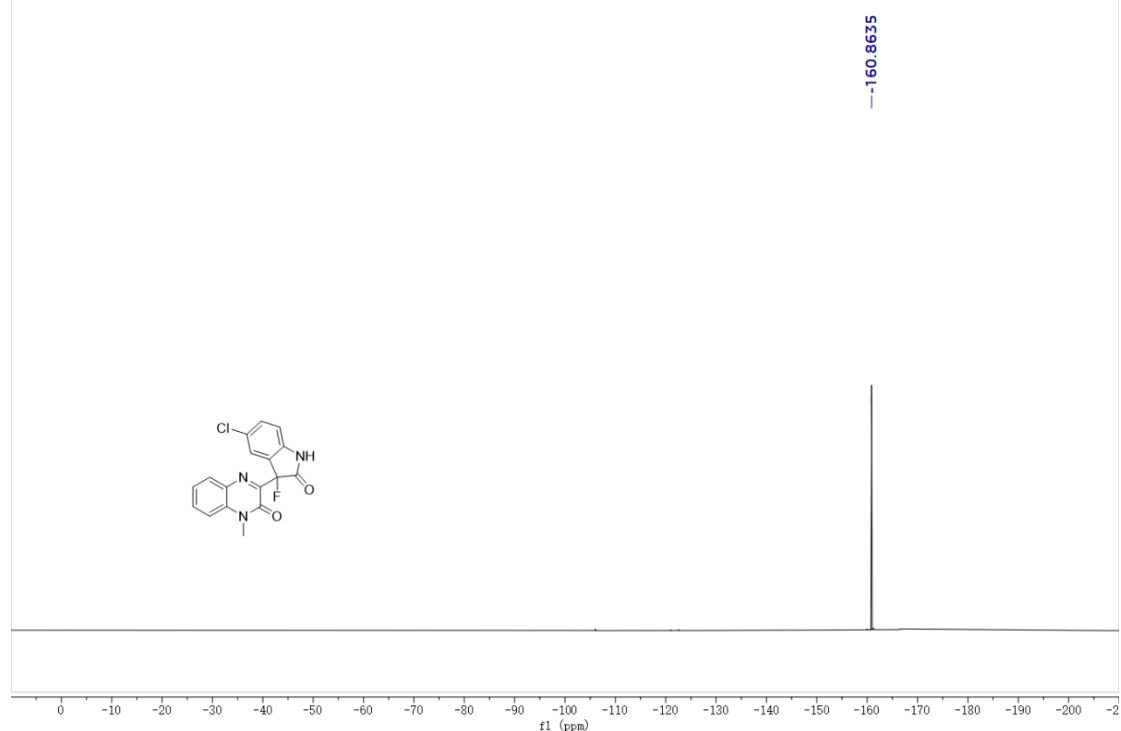

**Figure S23.** The  $^{19}\text{F}$  NMR Spectrum of Compound **3f** in  $\text{DMSO-}d_6$

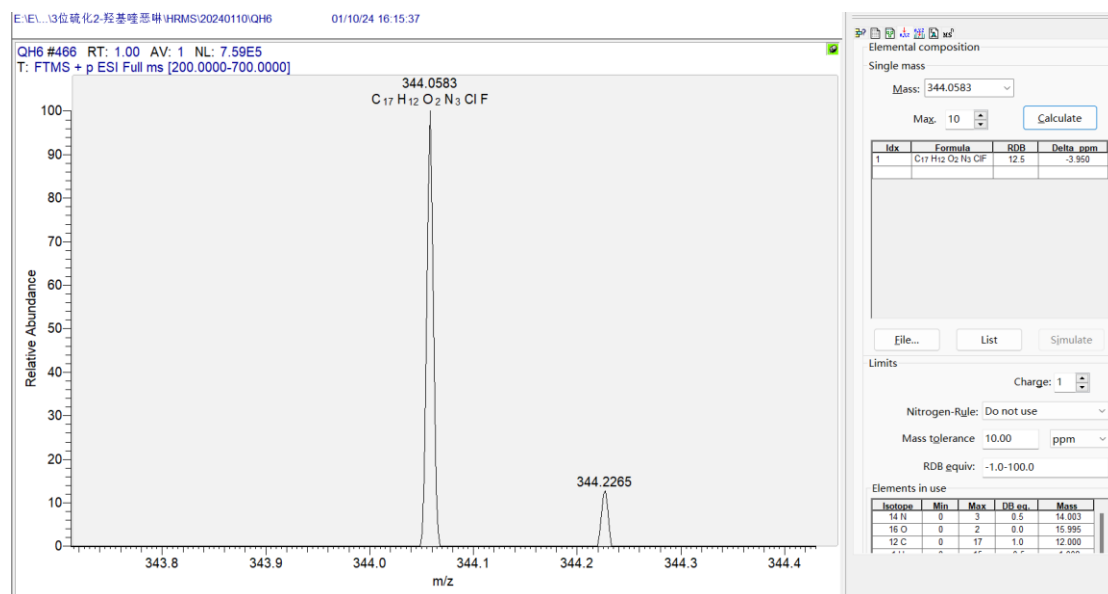

**Figure S24.** The HR-ESI-MS Spectrum of Compound **3f**



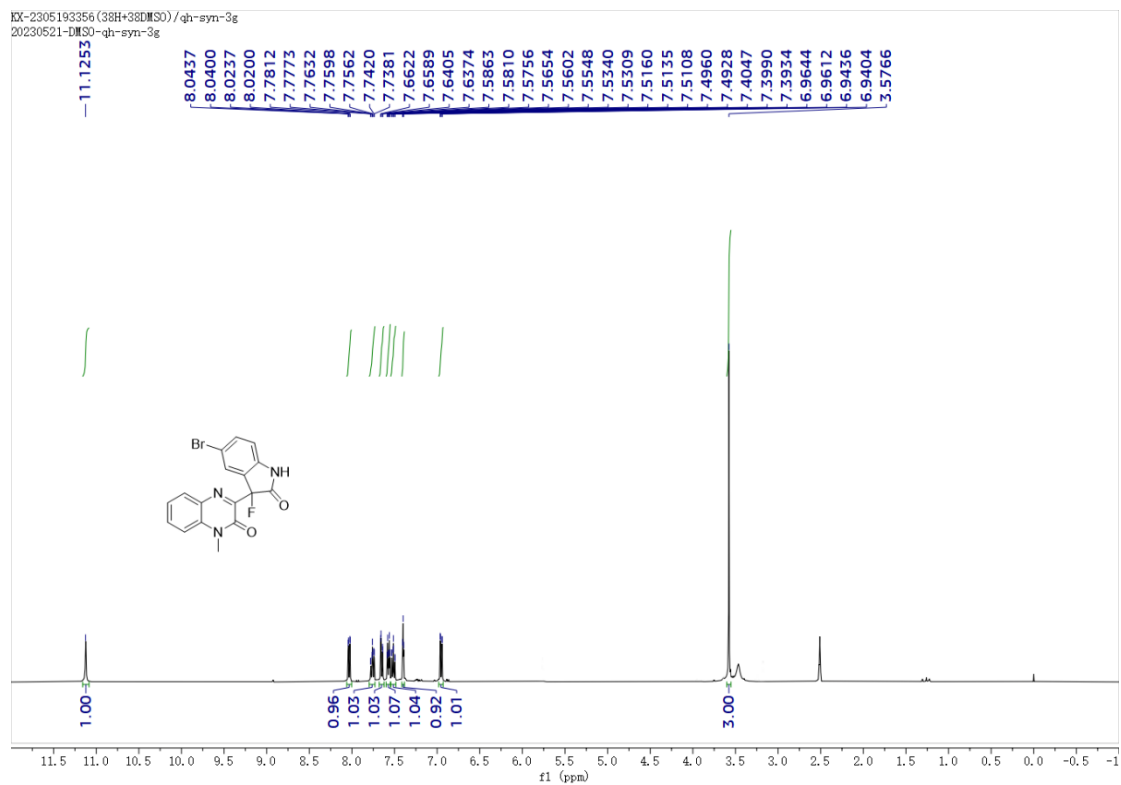

Figure S25. The  $^1\text{H}$  NMR Spectrum of Compound **3g** in  $\text{DMSO-}d_6$

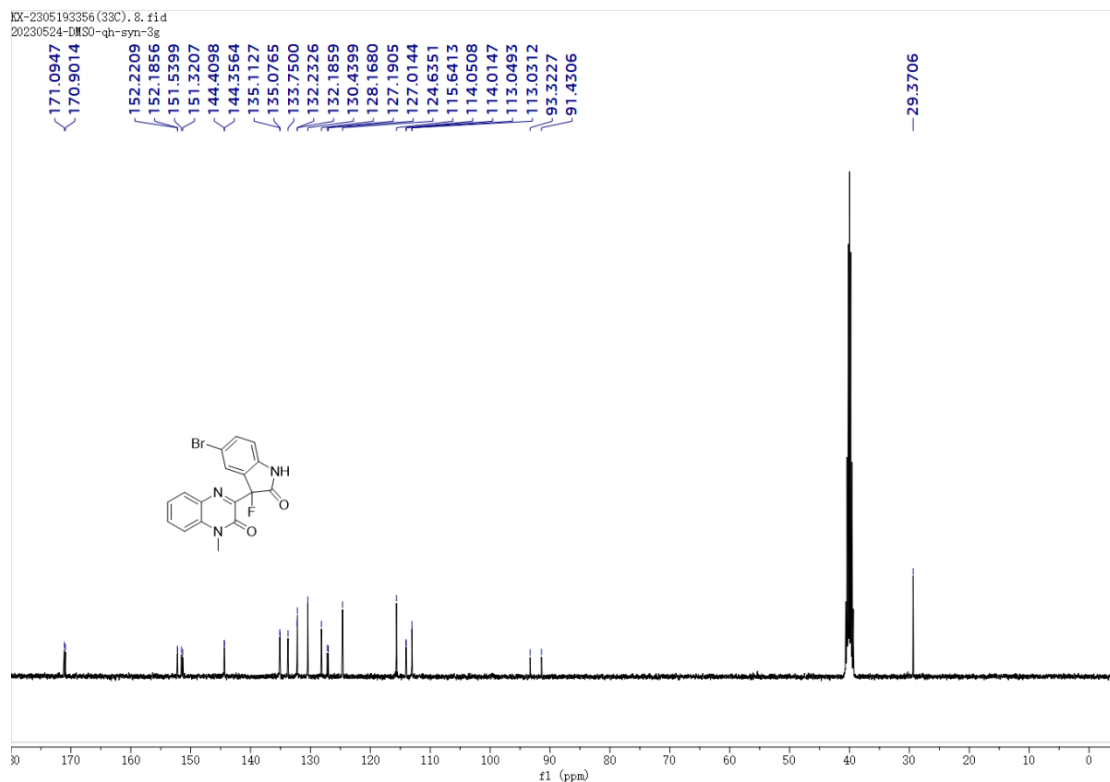

Figure S26. The  $^{13}\text{C}$  NMR Spectrum of Compound **3g** in  $\text{DMSO-}d_6$

KX-2305193356 (29F) / qh-syn-3g  
20230524-DMSO-qh-syn-3g

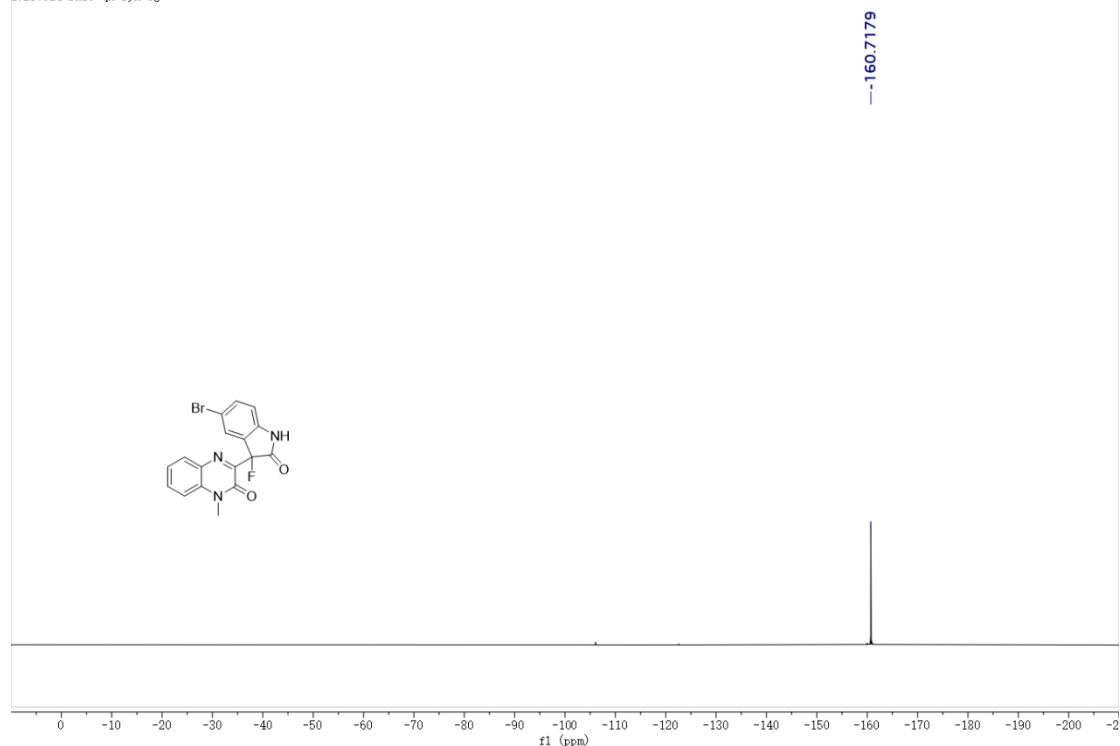

**Figure S27.** The  $^{19}\text{F}$  NMR Spectrum of Compound **3g** in  $\text{DMSO-}d_6$

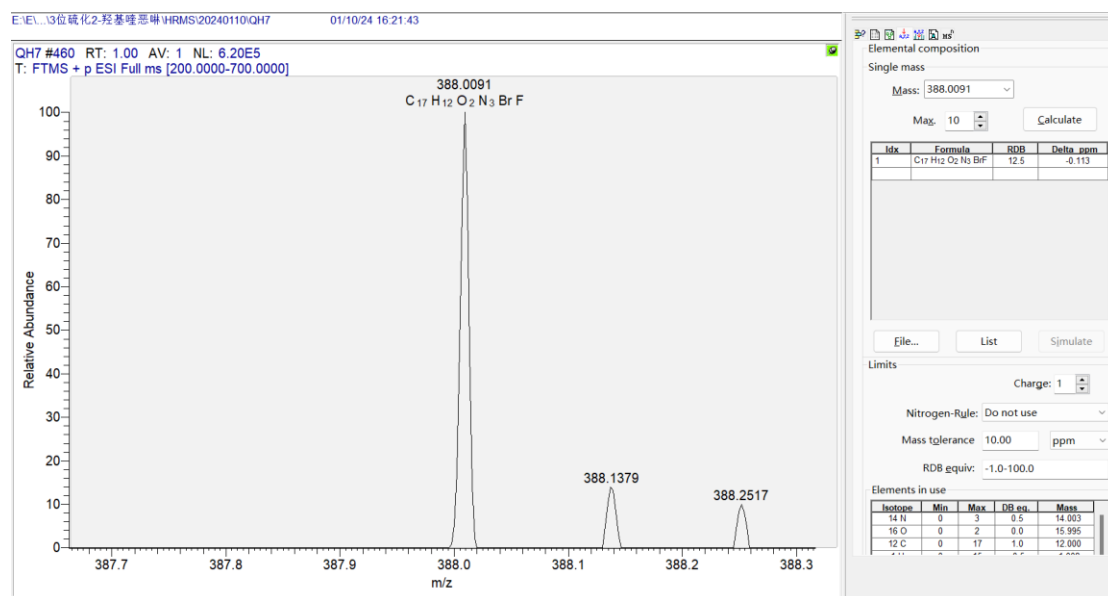

**Figure S28.** The HR-ESI-MS Spectrum of Compound **3g**

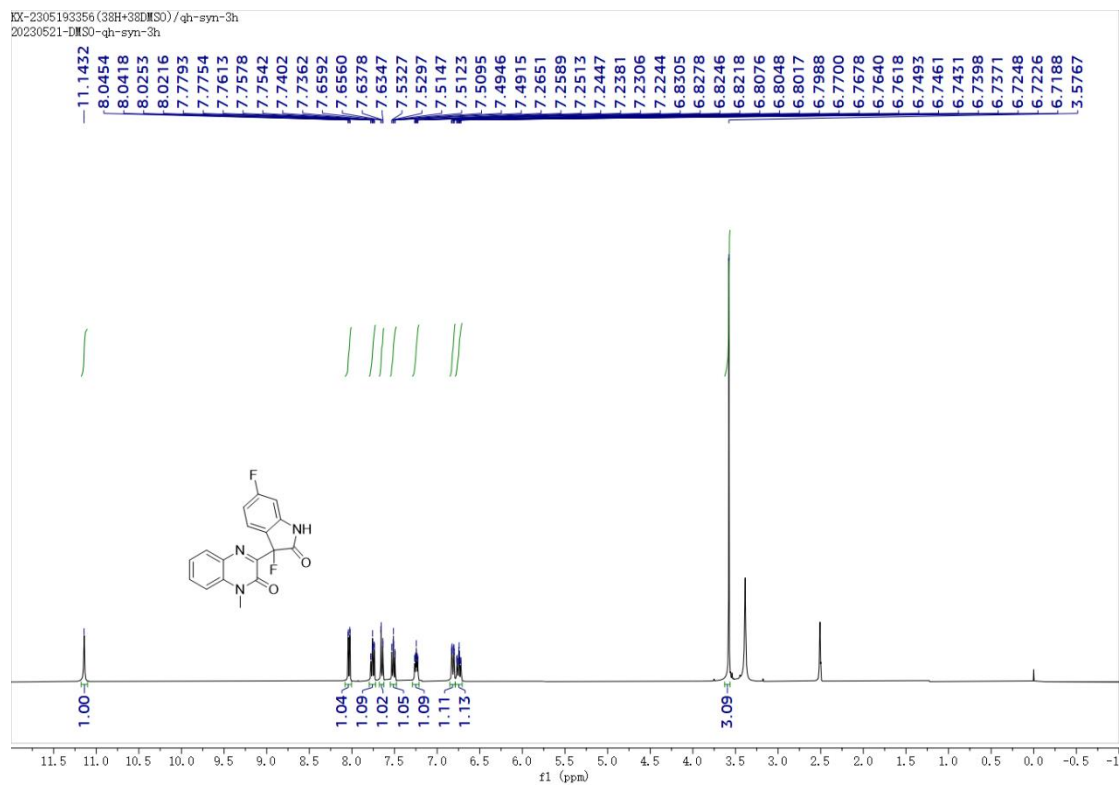

**Figure S29.** The  $^1\text{H}$  NMR Spectrum of Compound **3h** in  $\text{DMSO-}d_6$

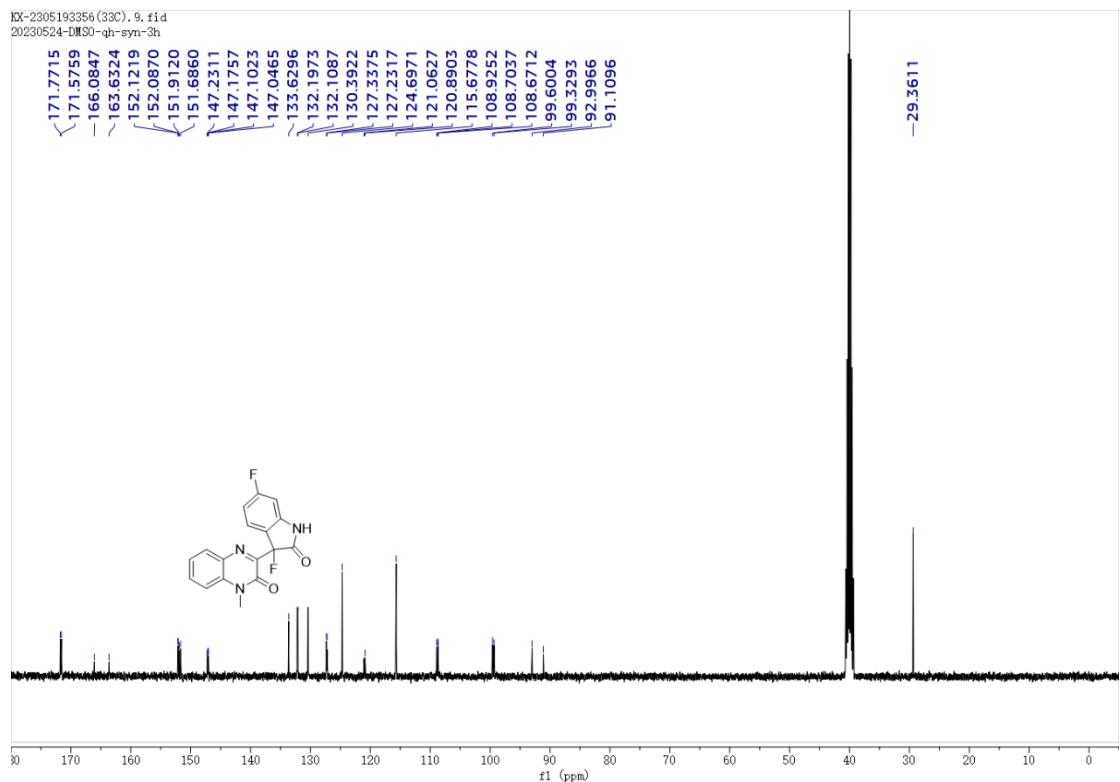

**Figure S30.** The  $^{13}\text{C}$  NMR Spectrum of Compound **3h** in  $\text{DMSO-}d_6$

KX-2305193356 (29F) / qh-syn-3h  
20230524-DMSO-qh-syn-3h

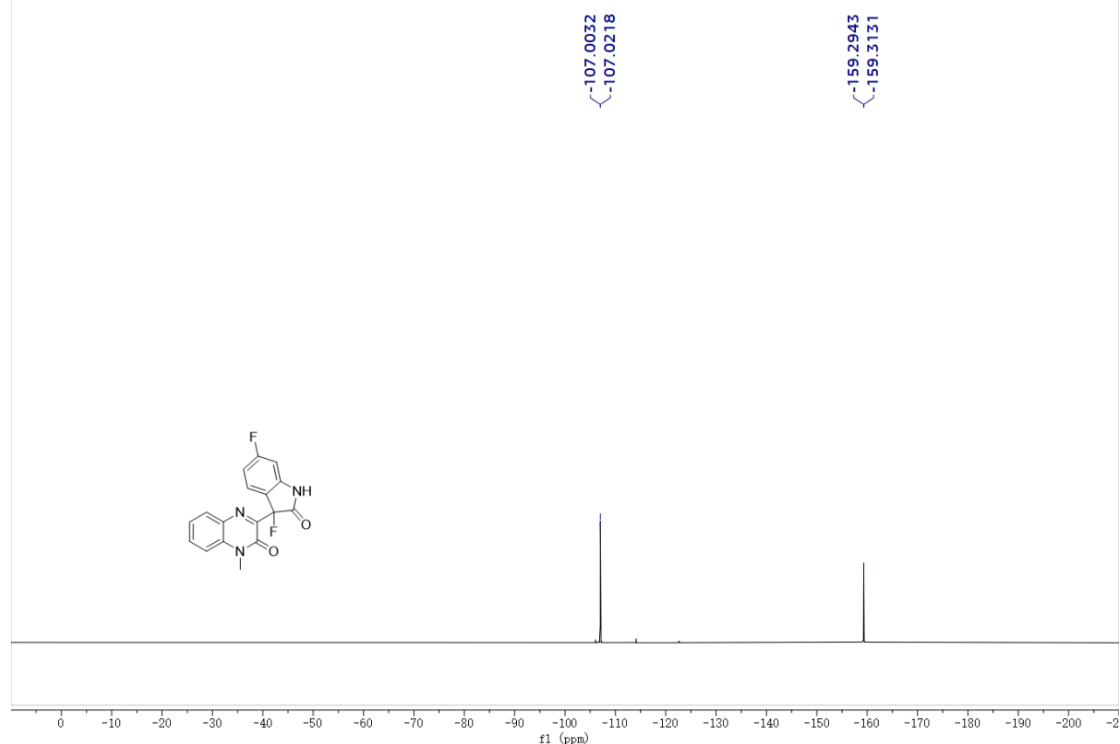

**Figure S31.** The  $^{19}\text{F}$  NMR Spectrum of Compound **3h** in  $\text{DMSO-}d_6$

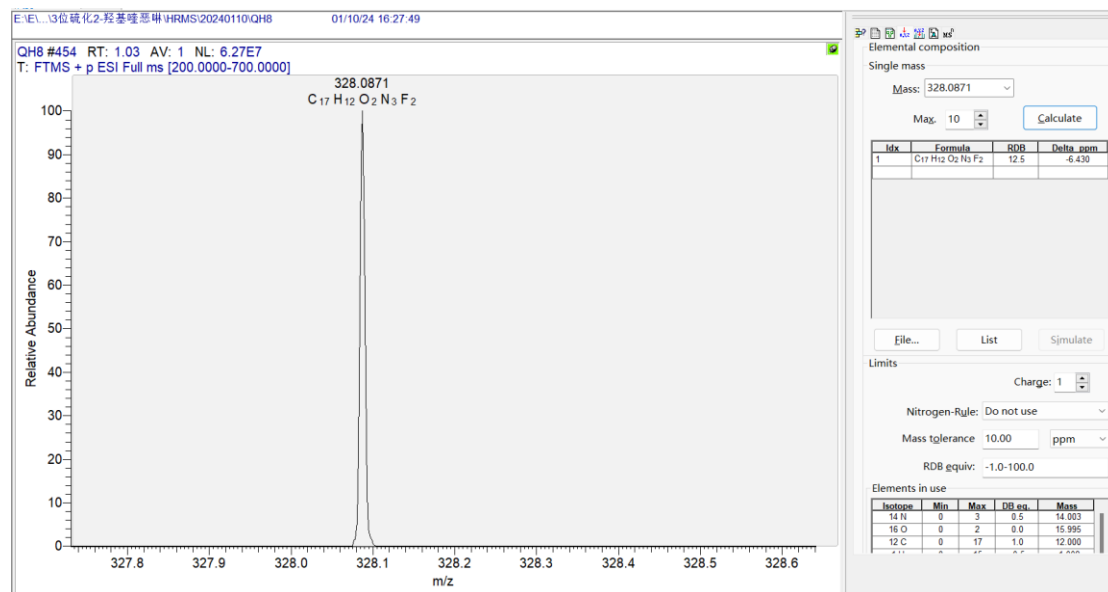

**Figure S32.** The HR-ESI-MS Spectrum of Compound **3h**

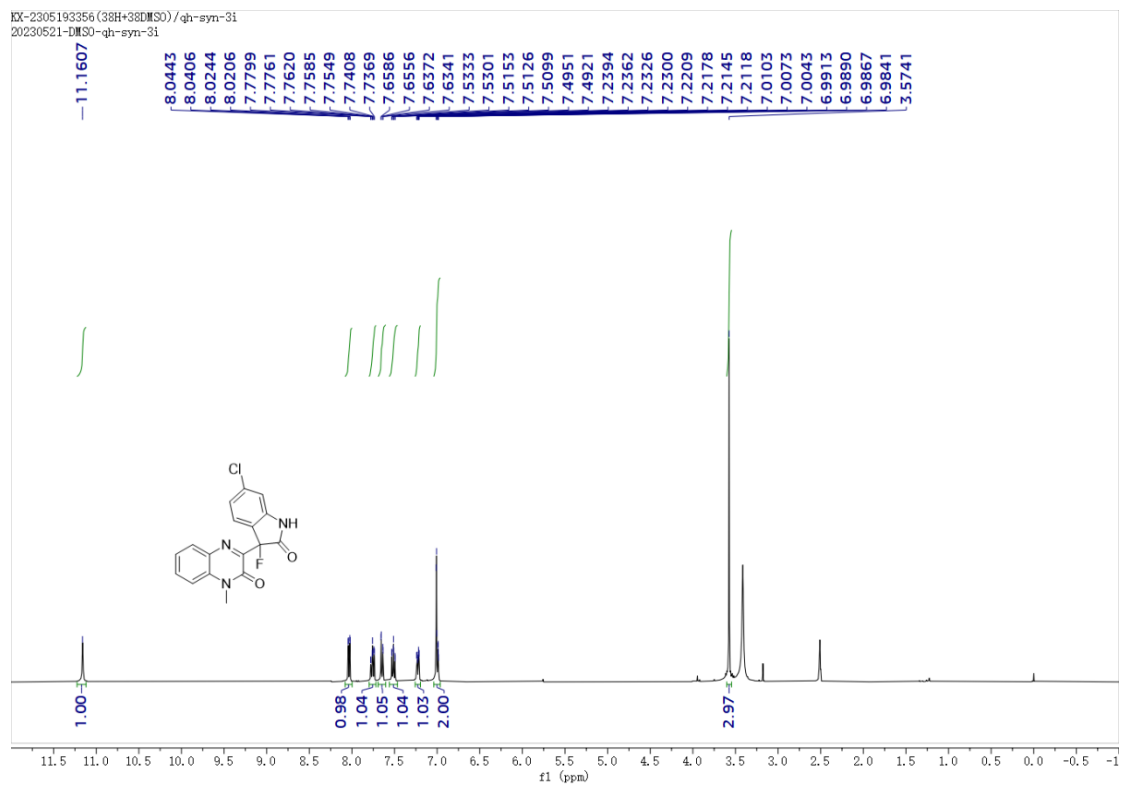

**Figure S33.** The  $^1\text{H}$  NMR Spectrum of Compound **3i** in  $\text{DMSO-}d_6$

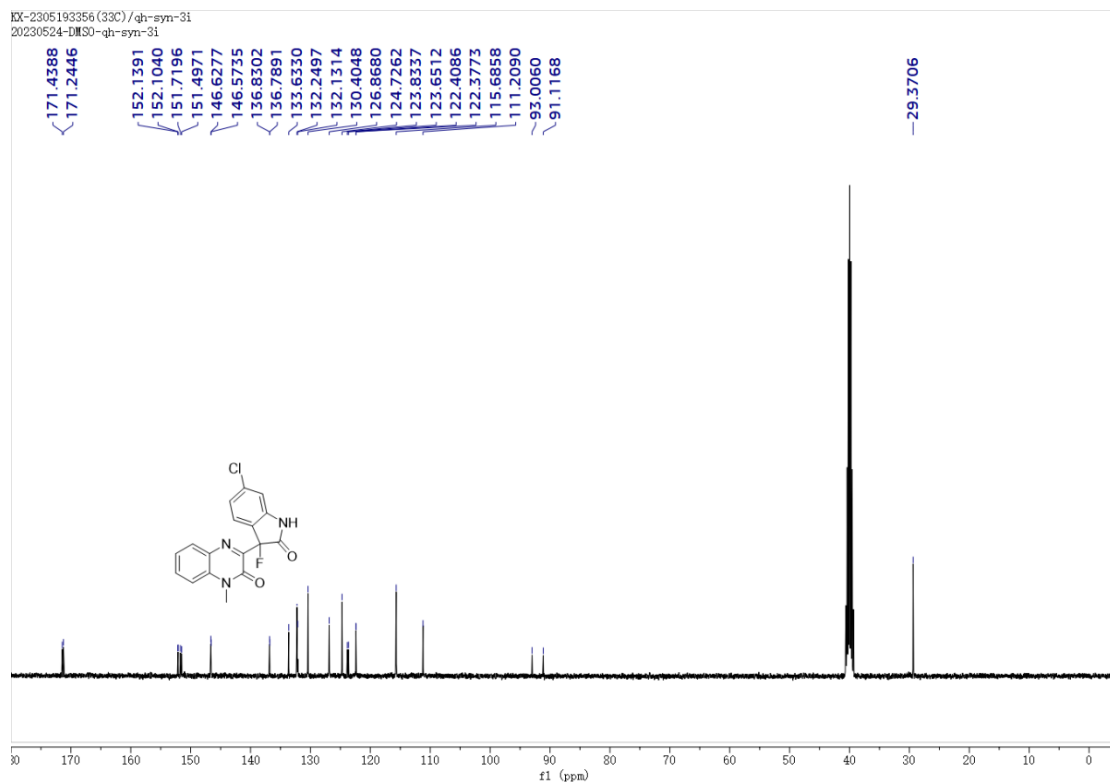

**Figure S34.** The  $^{13}\text{C}$  NMR Spectrum of Compound **3i** in  $\text{DMSO-}d_6$

KX-2305193356 (29F) / qh-syn-3i  
20230524-DMSO-qh-syn-3i

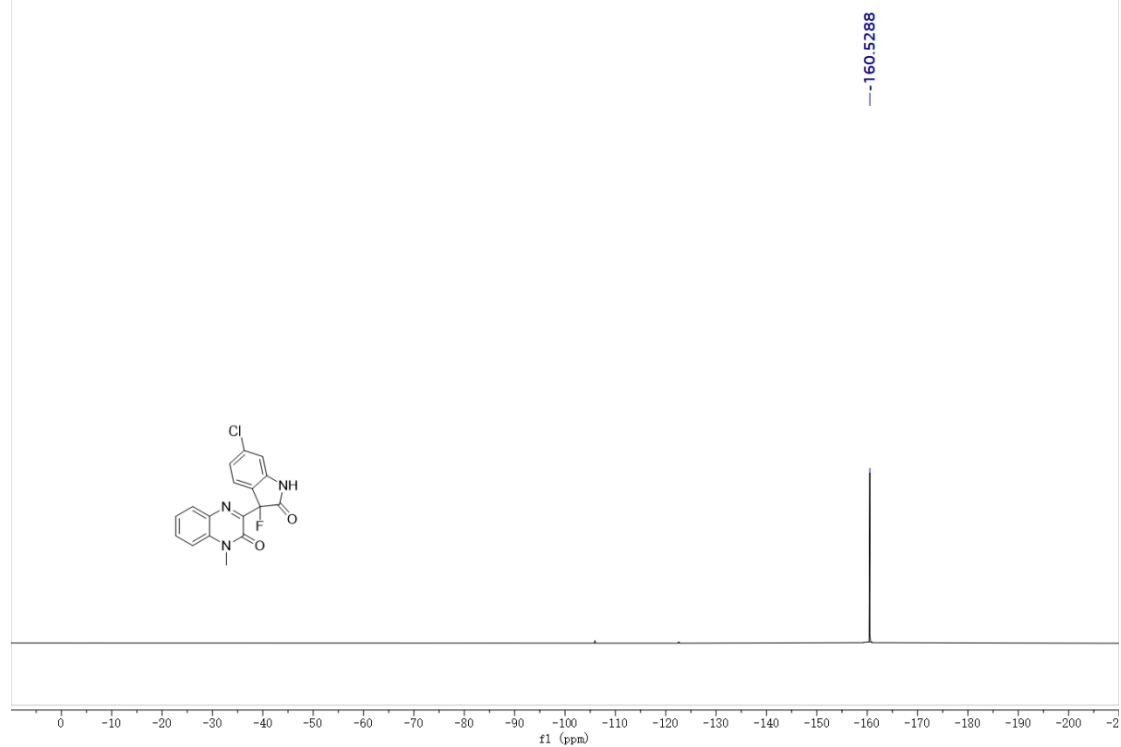

**Figure S35.** The  $^{19}\text{F}$  NMR Spectrum of Compound **3i** in  $\text{DMSO-}d_6$

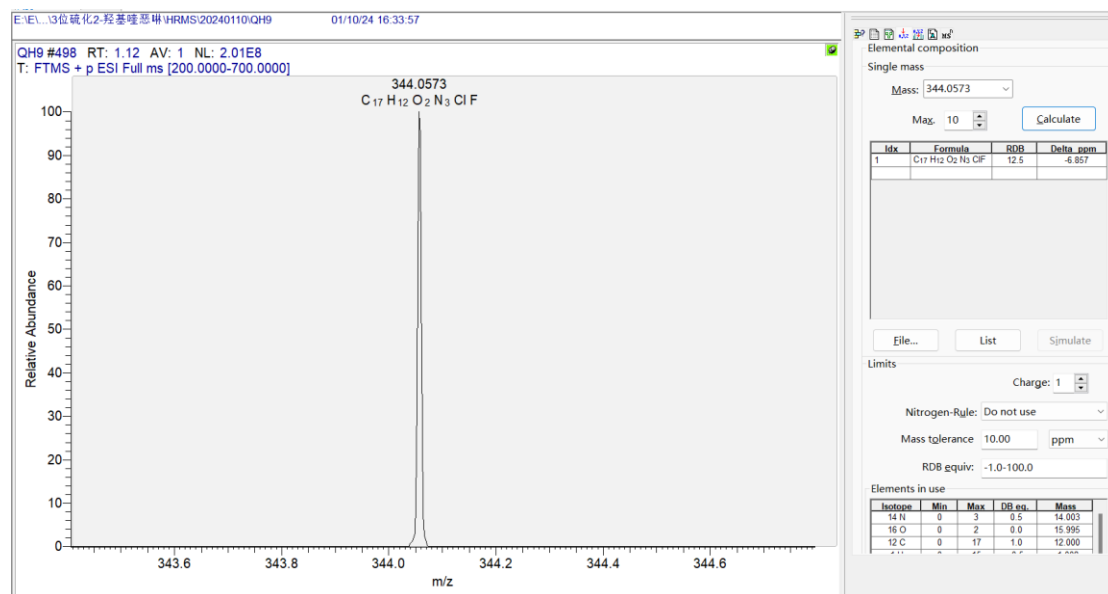

**Figure S36.** The HR-ESI-MS Spectrum of Compound **3i**

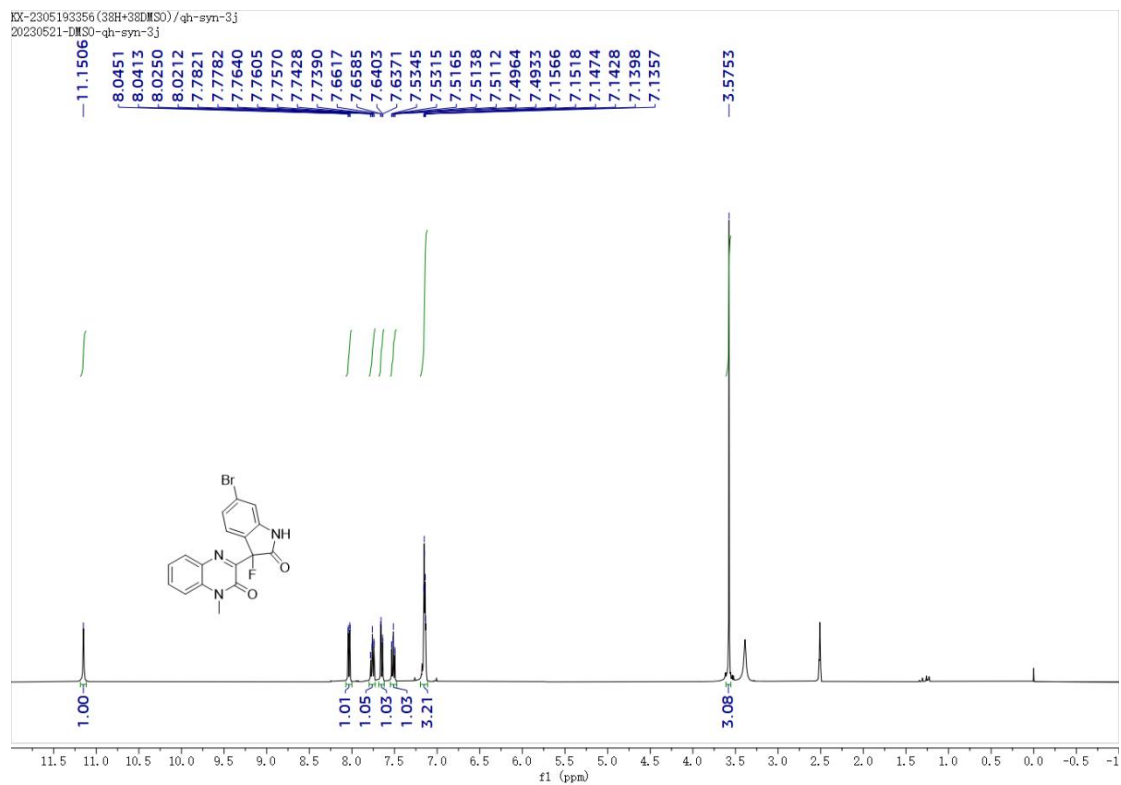

Figure S37. The  $^1\text{H}$  NMR Spectrum of Compound **3j** in  $\text{DMSO-}d_6$

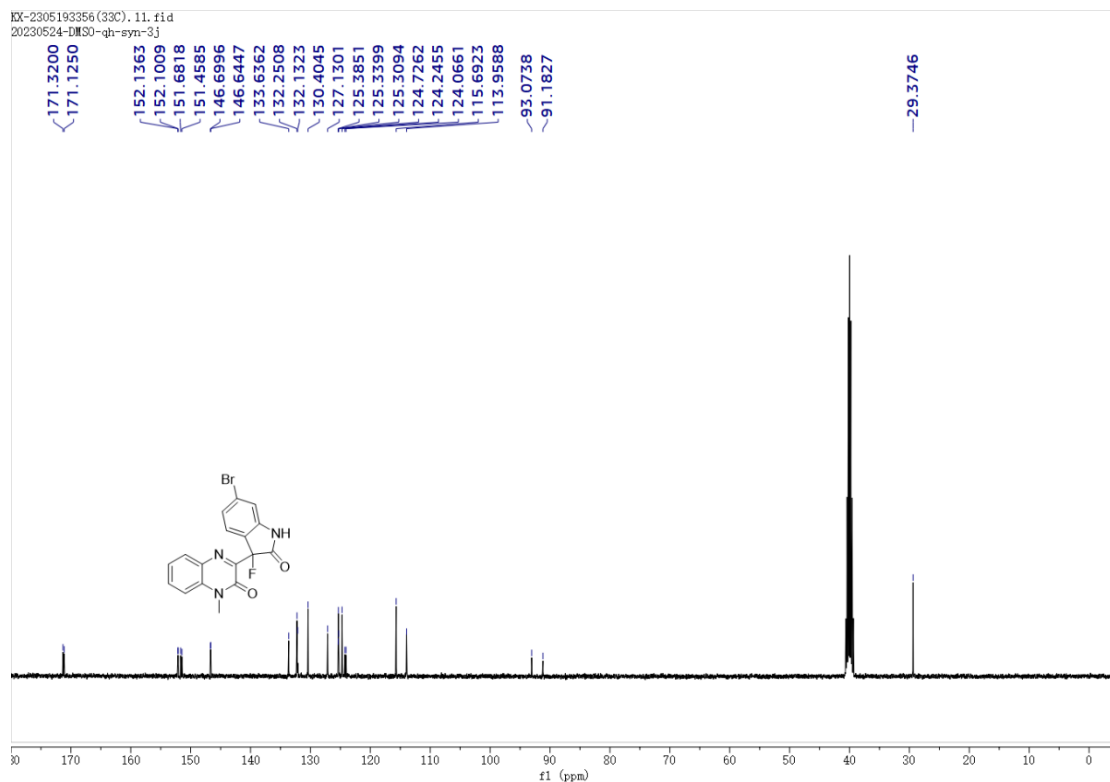

Figure S38. The  $^{13}\text{C}$  NMR Spectrum of Compound **3j** in  $\text{DMSO-}d_6$

KX-2305193356 (29F) / qh-syn-3j  
20230524-DMSO-qh-syn-3j

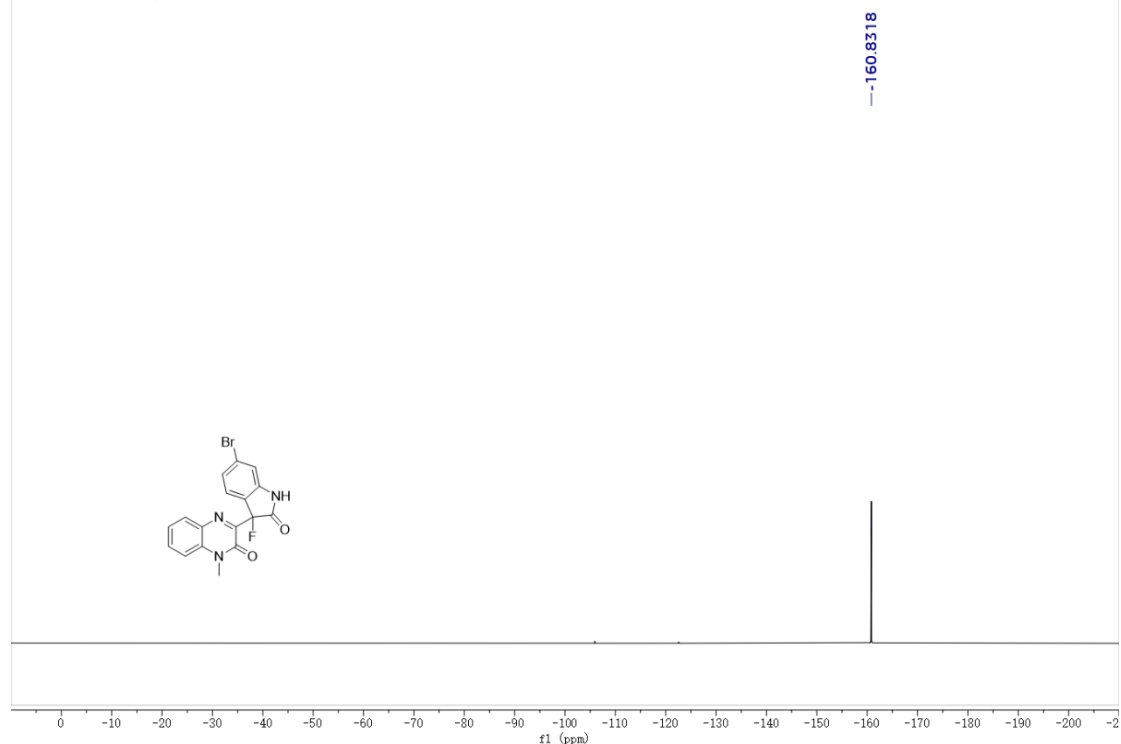

**Figure S39.** The  $^{19}\text{F}$  NMR Spectrum of Compound **3j** in  $\text{DMSO-}d_6$

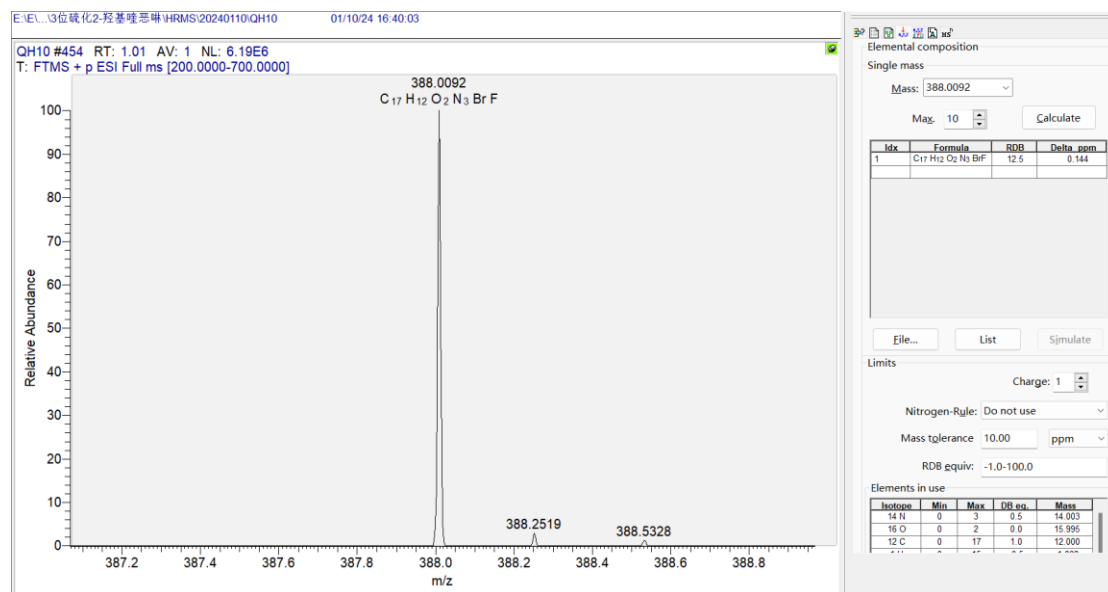

**Figure S40.** The HR-ESI-MS Spectrum of Compound **3j**



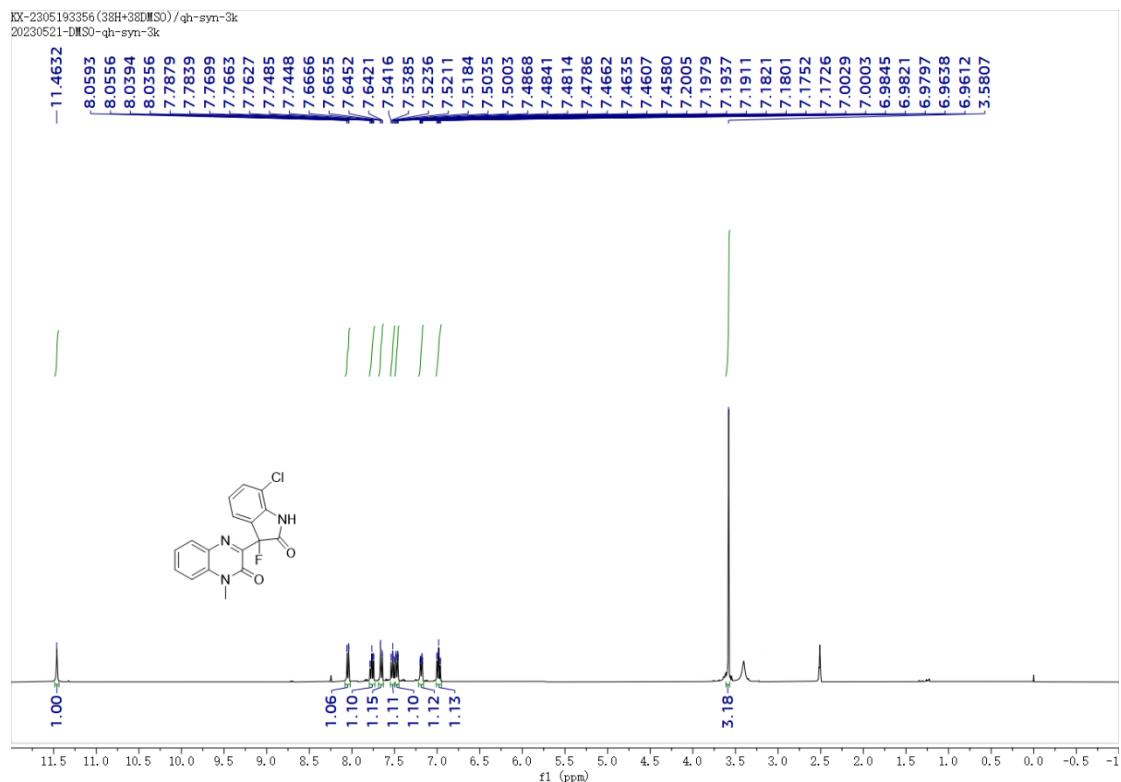

**Figure S41.** The  $^1\text{H}$  NMR Spectrum of Compound **3k** in  $\text{DMSO-}d_6$

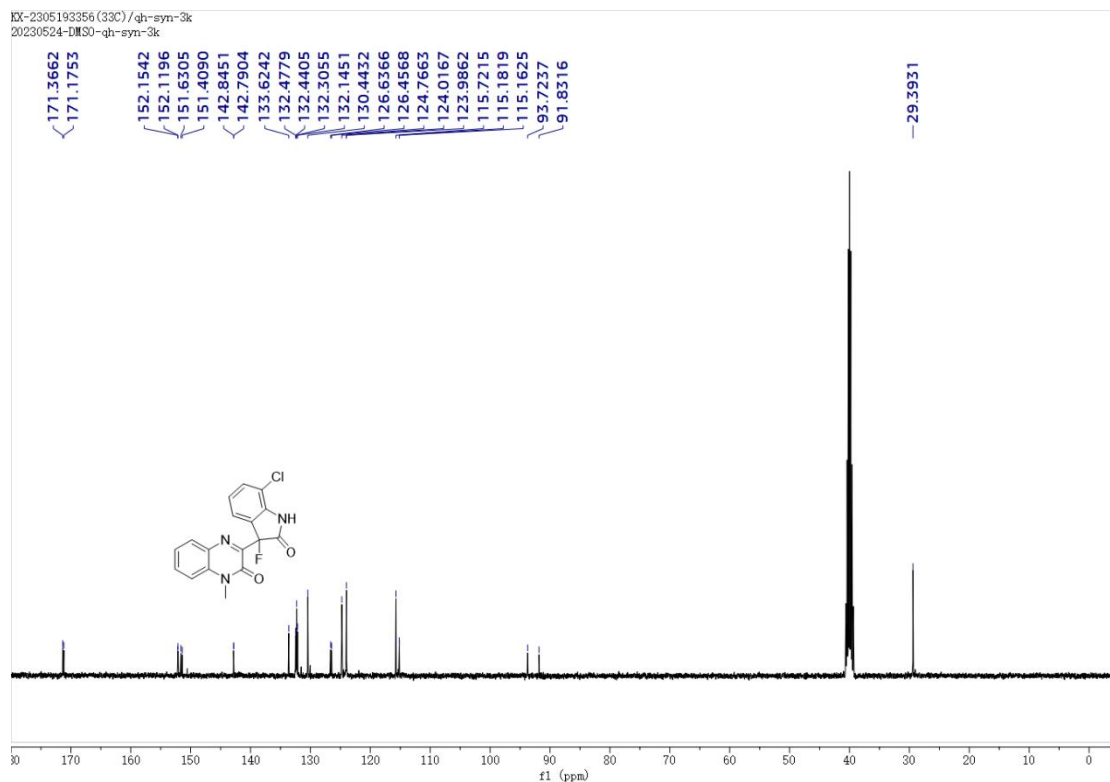

**Figure S42.** The  $^{13}\text{C}$  NMR Spectrum of Compound **3k** in  $\text{DMSO-}d_6$

KX-2305193356 (29F) / qh-syn-3k  
20230524-DMSO-qh-syn-3k

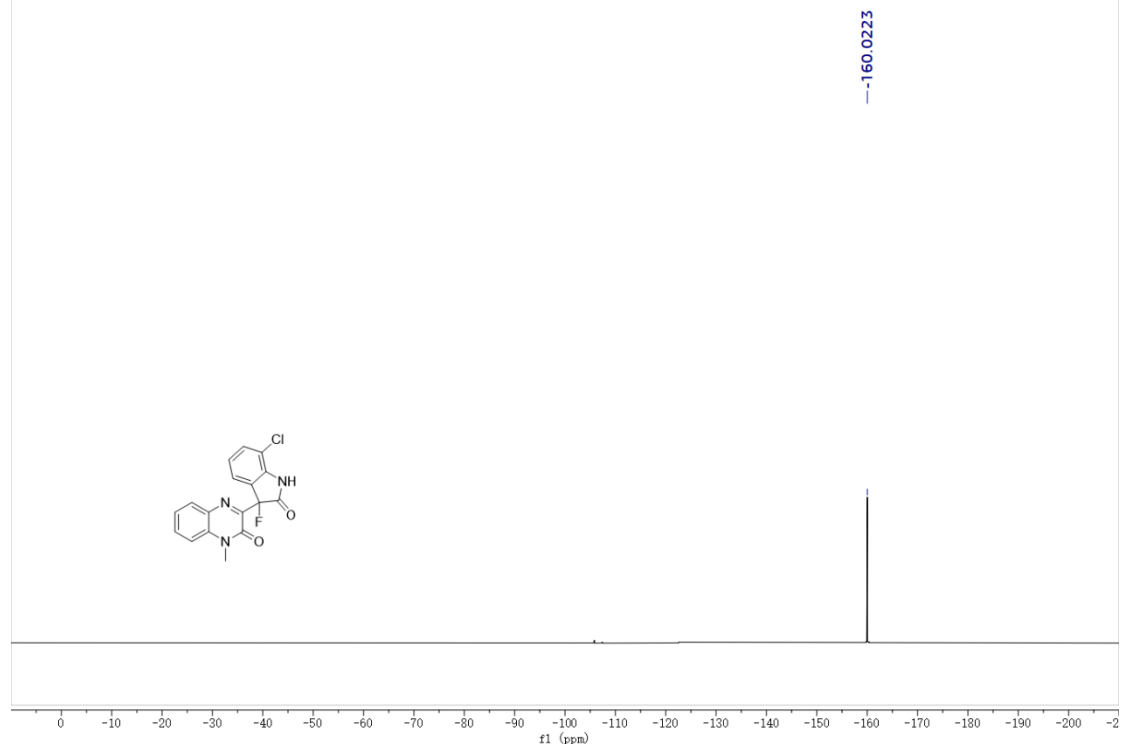

**Figure S43.** The  $^{19}\text{F}$  NMR Spectrum of Compound **3k** in  $\text{DMSO-}d_6$

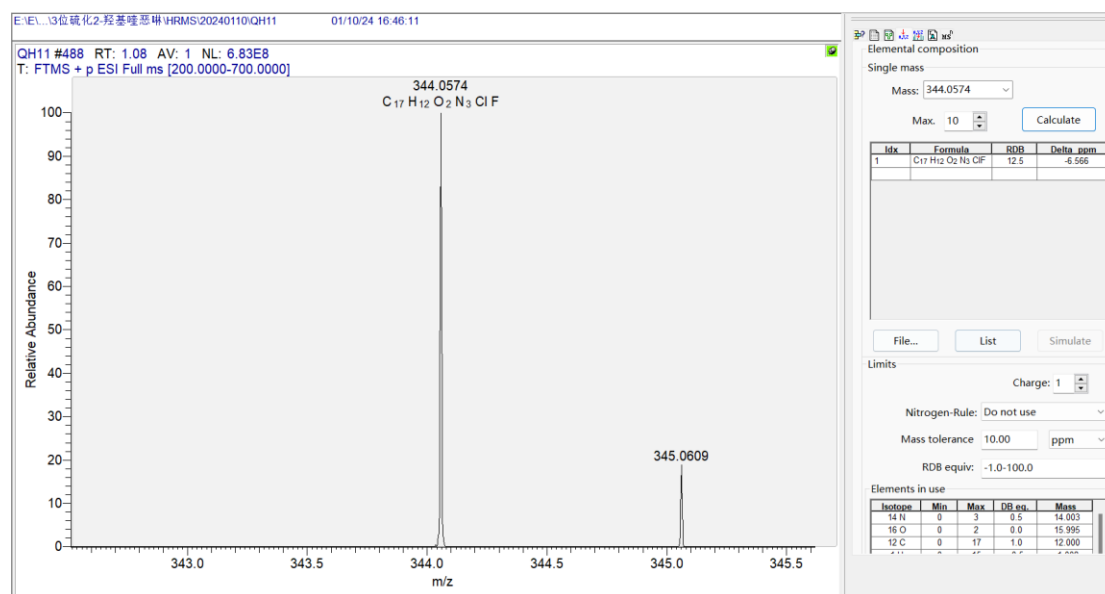

**Figure S44.** The HR-ESI-MS Spectrum of Compound **3k**

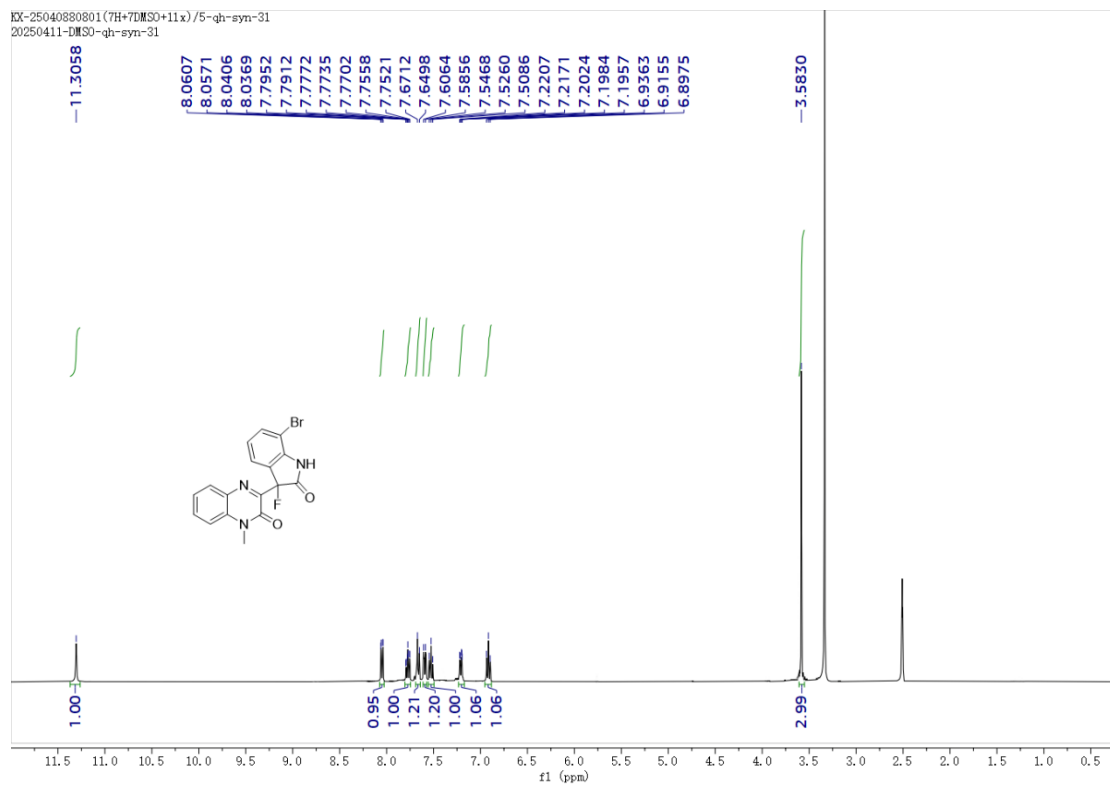

**Figure S45.** The <sup>1</sup>H NMR Spectrum of Compound 3l in DMSO-*d*<sub>6</sub>

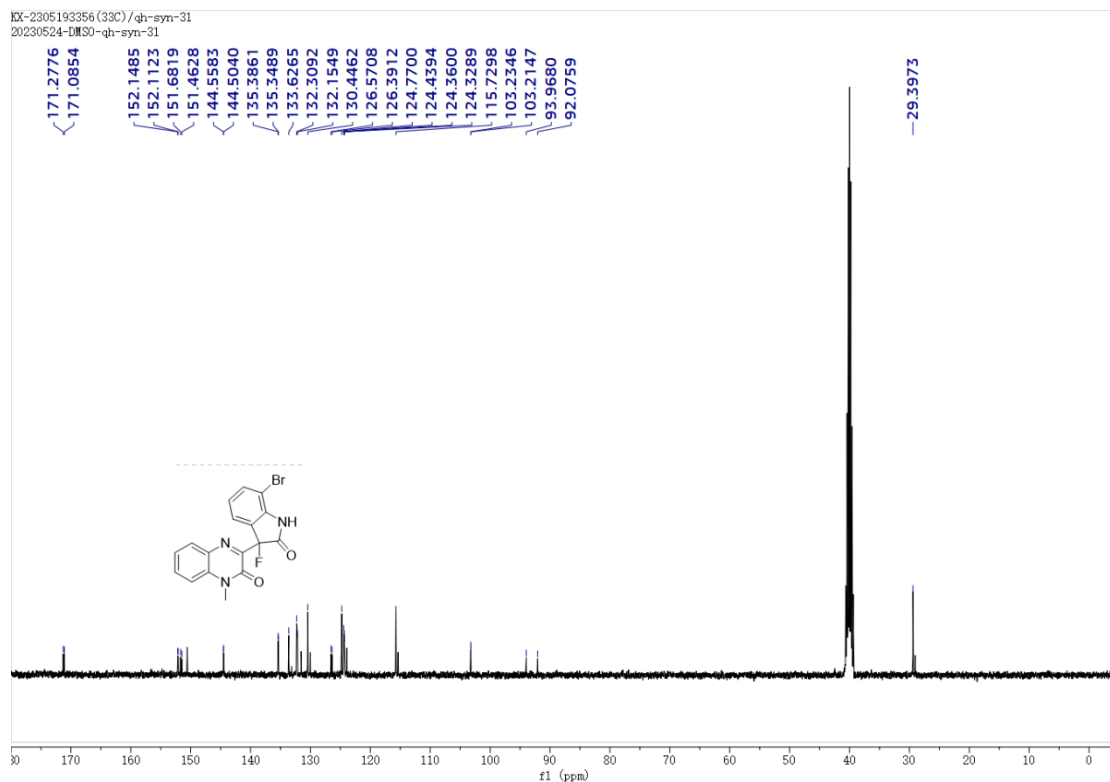

**Figure S46.** The <sup>13</sup>C NMR Spectrum of Compound 3l in DMSO-*d*<sub>6</sub>

KX-2305193356 (29F) / qh-syn-31  
20230524-DMSO-qh-syn-31

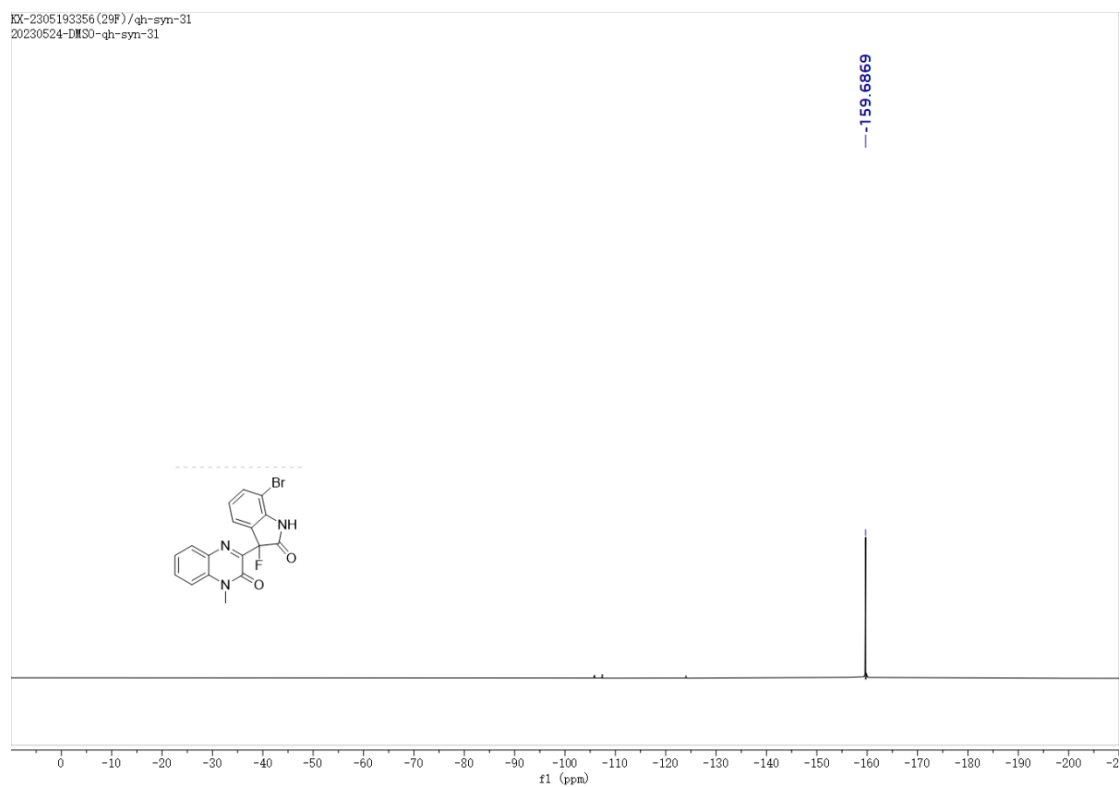

**Figure S47.** The  $^{19}\text{F}$  NMR Spectrum of Compound **3I** in  $\text{DMSO}-d_6$

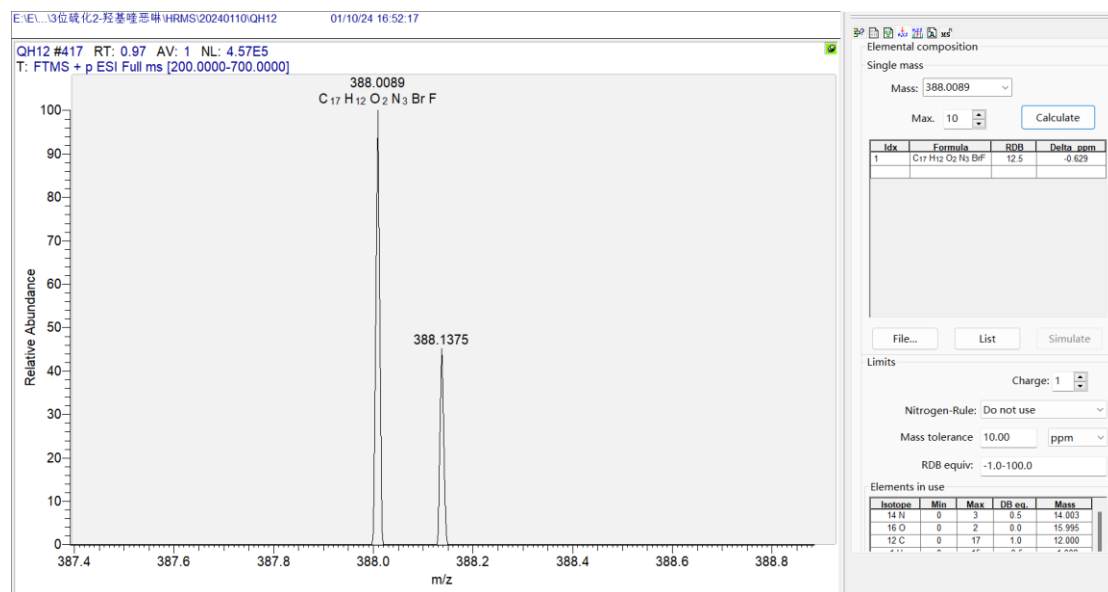

**Figure S48.** The HR-ESI-MS Spectrum of Compound **3I**

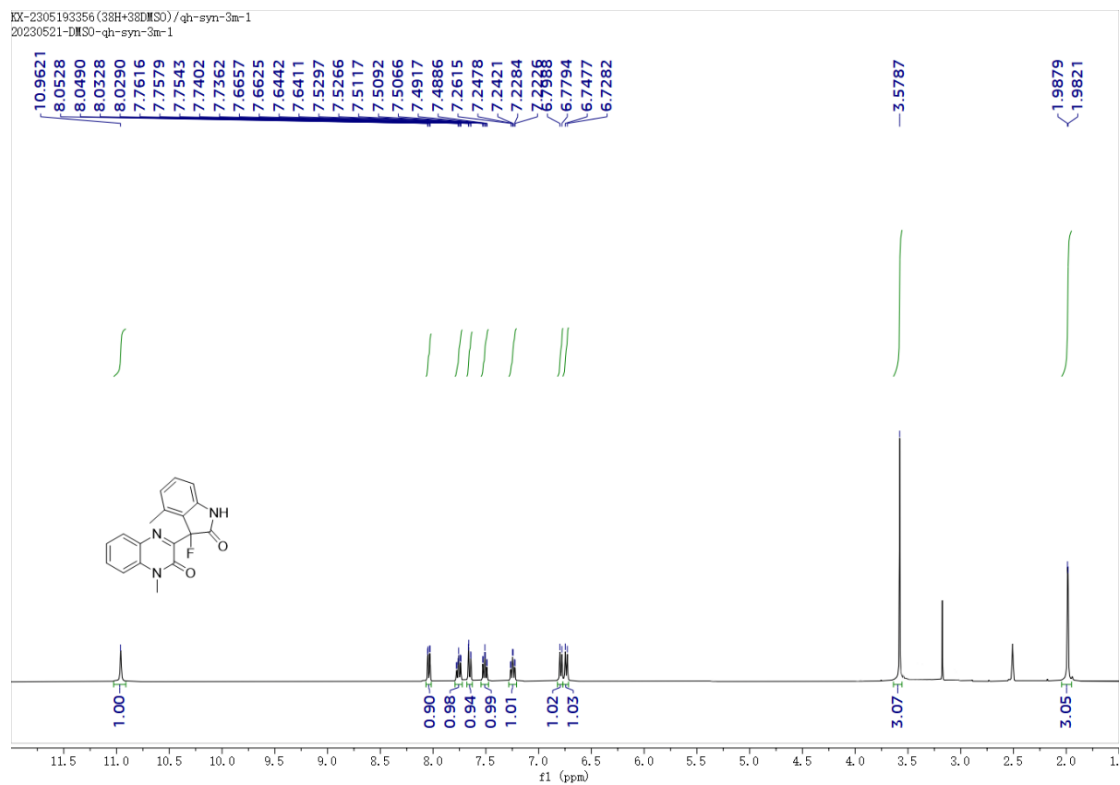

Figure S49. The  $^1\text{H}$  NMR Spectrum of Compound **3m** in  $\text{DMSO-}d_6$

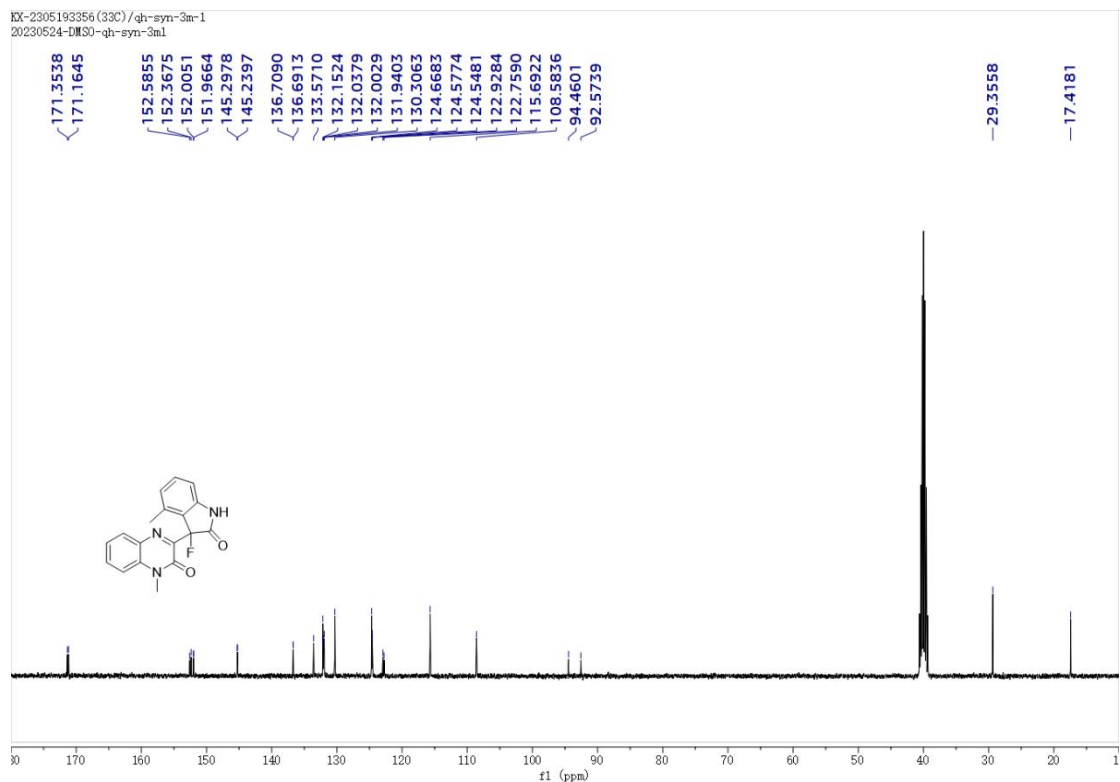

Figure S50. The  $^{13}\text{C}$  NMR Spectrum of Compound **3m** in  $\text{DMSO-}d_6$

KX-2305193356 (20F) / qh-syn-3m-1  
20230524-DMSO-qh-syn-3mL

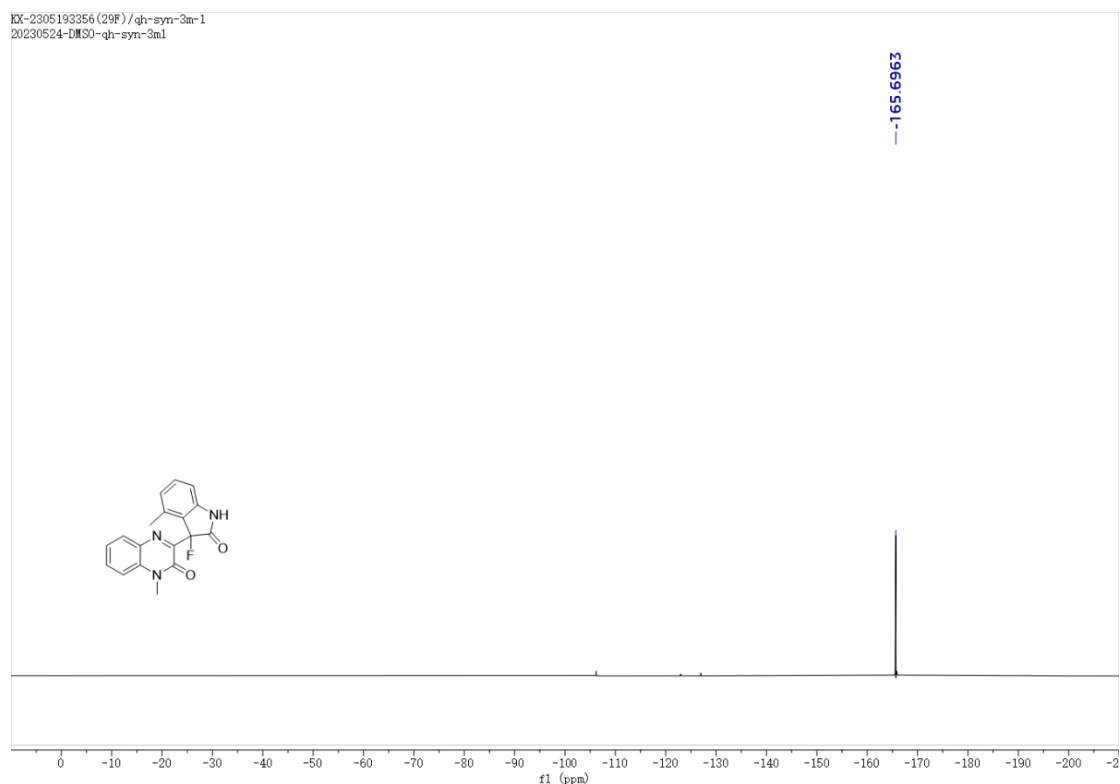

Figure S51. The  $^{19}\text{F}$  NMR Spectrum of Compound **3m** in  $\text{DMSO-}d_6$

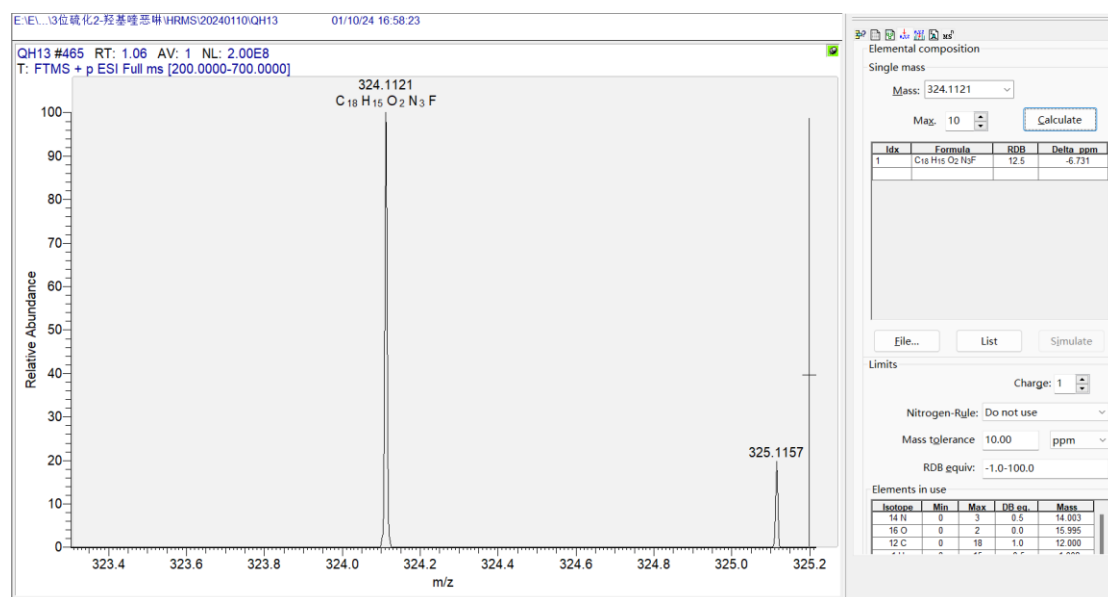

Figure S52. The HR-ESI-MS Spectrum of Compound **3m**

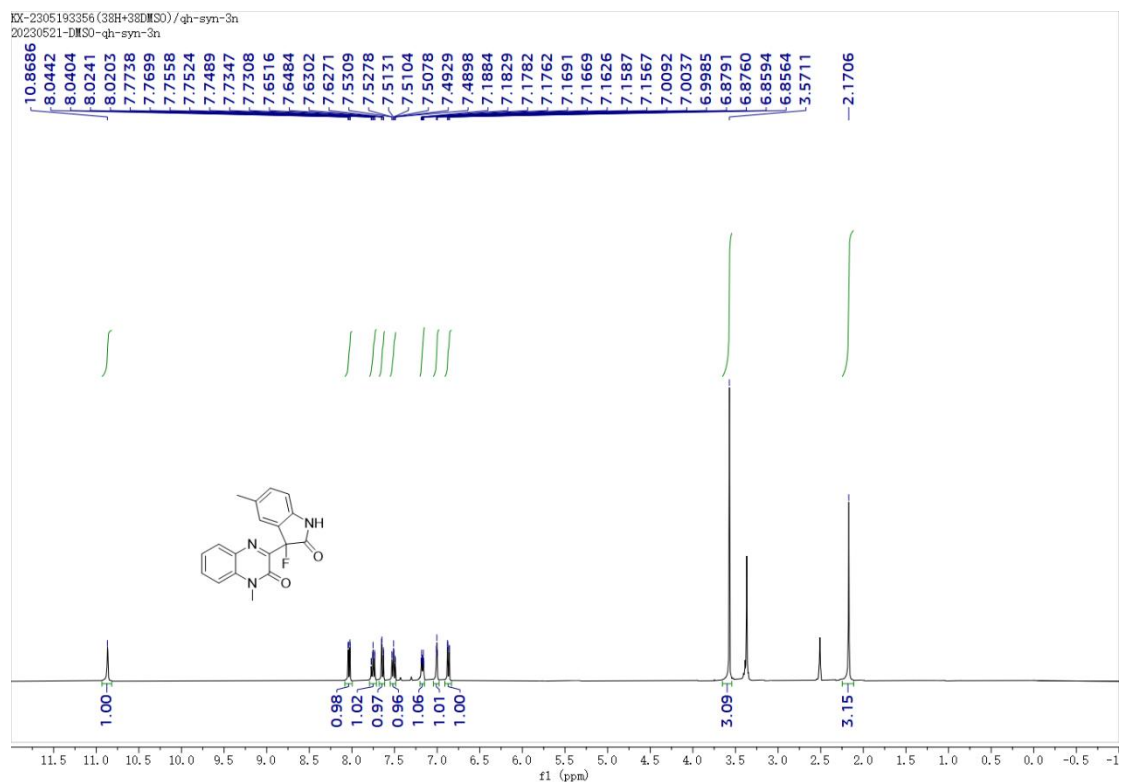

**Figure S53.** The  $^1\text{H}$  NMR Spectrum of Compound **3n** in  $\text{DMSO-}d_6$

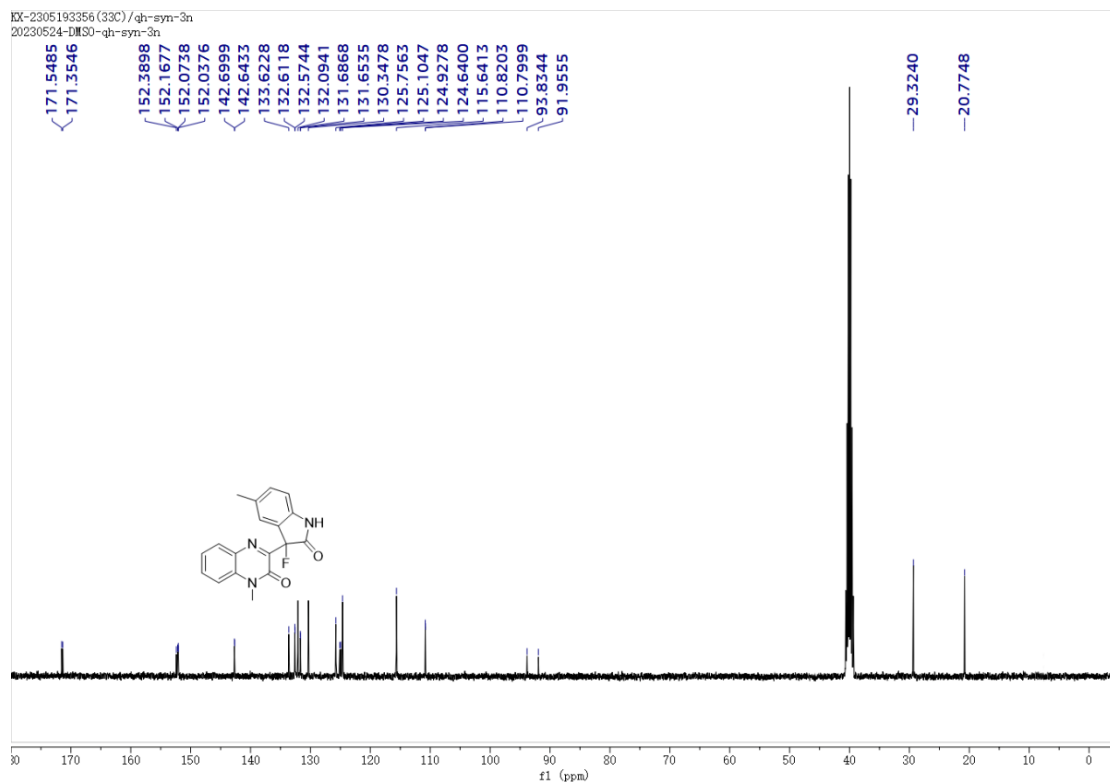

**Figure S54** The  $^{13}\text{C}$  NMR Spectrum of Compound **3n** in  $\text{DMSO-}d_6$

KX-2305193356 (29F) / qh-syn-3n  
20230524-DMSO-qh-syn-3n

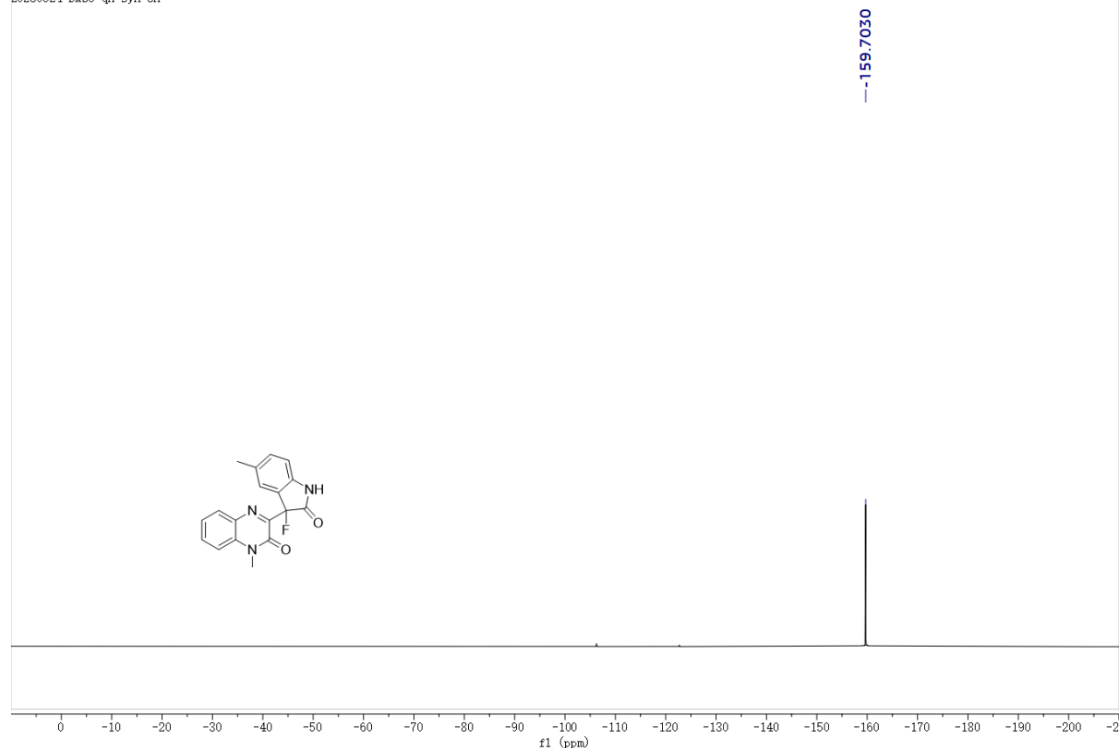

**Figure S55.** The  $^{19}\text{F}$  NMR Spectrum of Compound **3n** in  $\text{DMSO-}d_6$

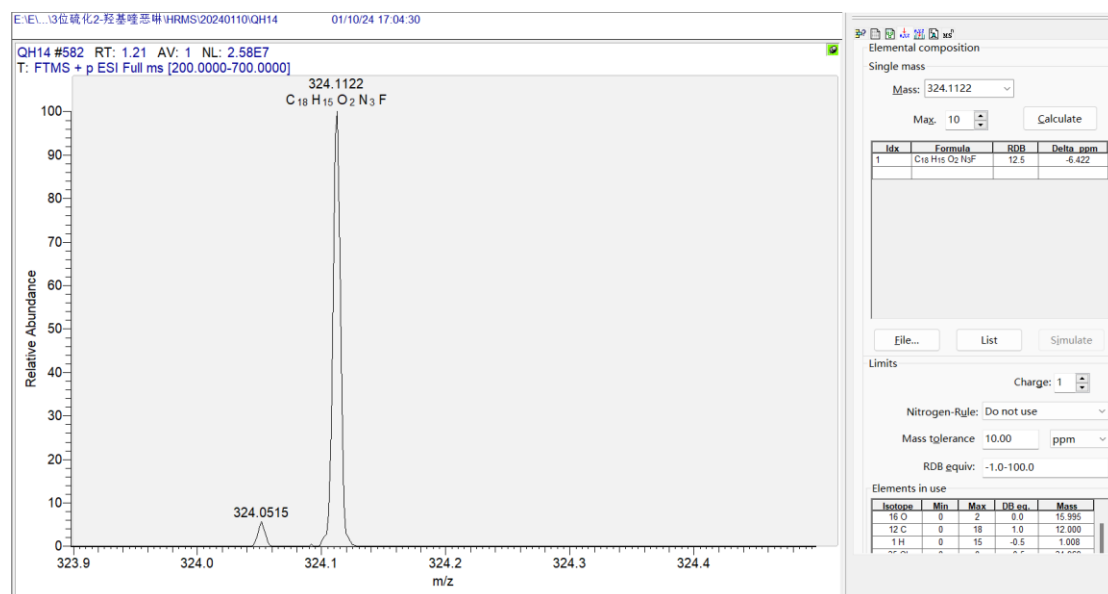

**Figure S56.** The HR-ESI-MS Spectrum of Compound **3n**



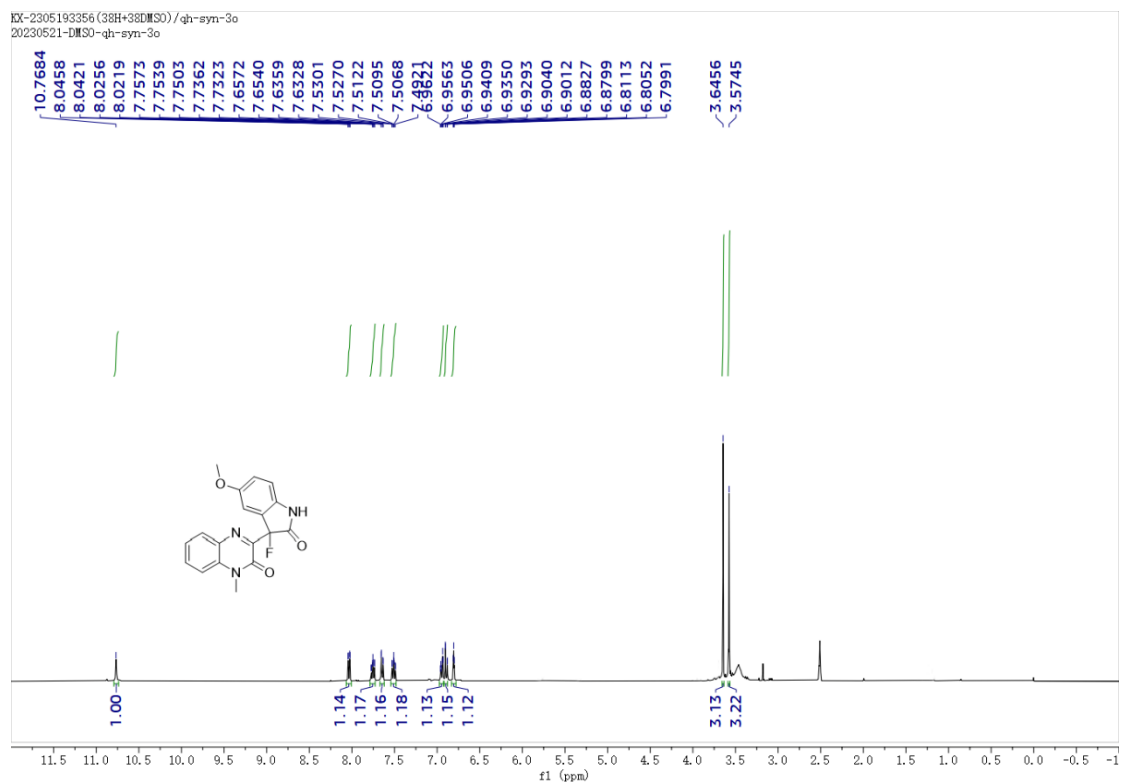

**Figure S57.** The  $^1\text{H}$  NMR Spectrum of Compound **3o** in  $\text{DMSO}-d_6$

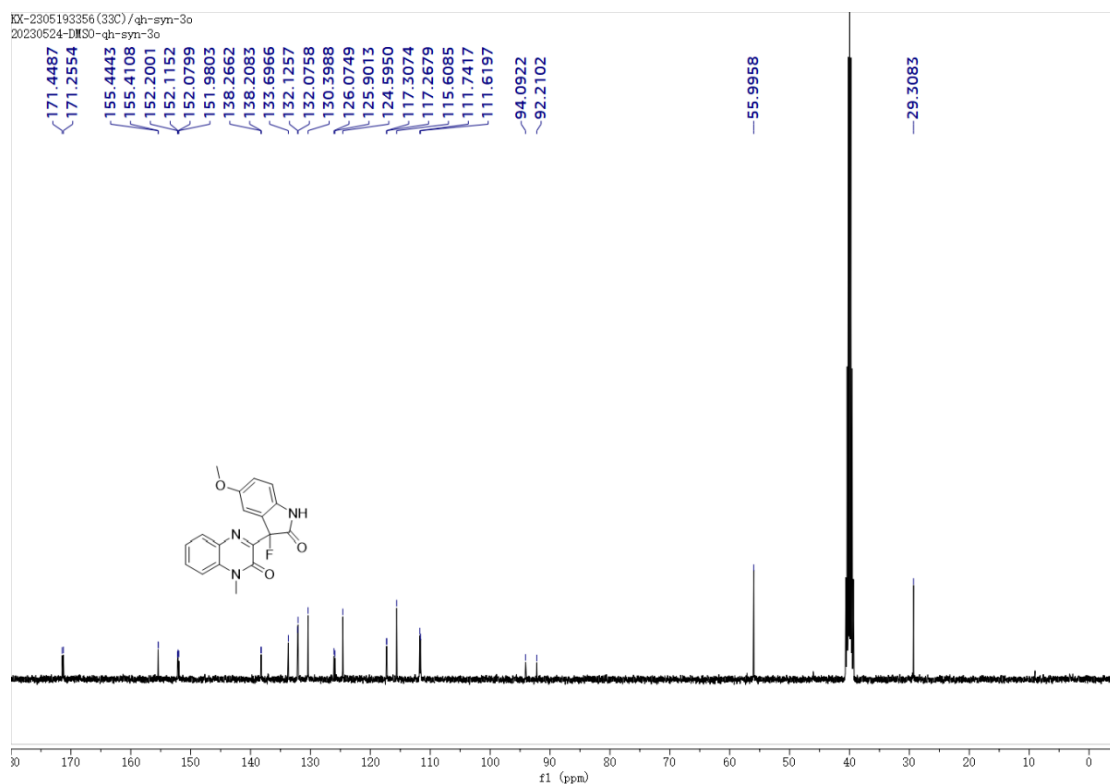

**Figure S58.** The  $^{13}\text{C}$  NMR Spectrum of Compound **3o** in  $\text{DMSO}-d_6$

KX-2305193356 (29F) / qh-syn-3o  
20230524-DMSO-qh-syn-3o

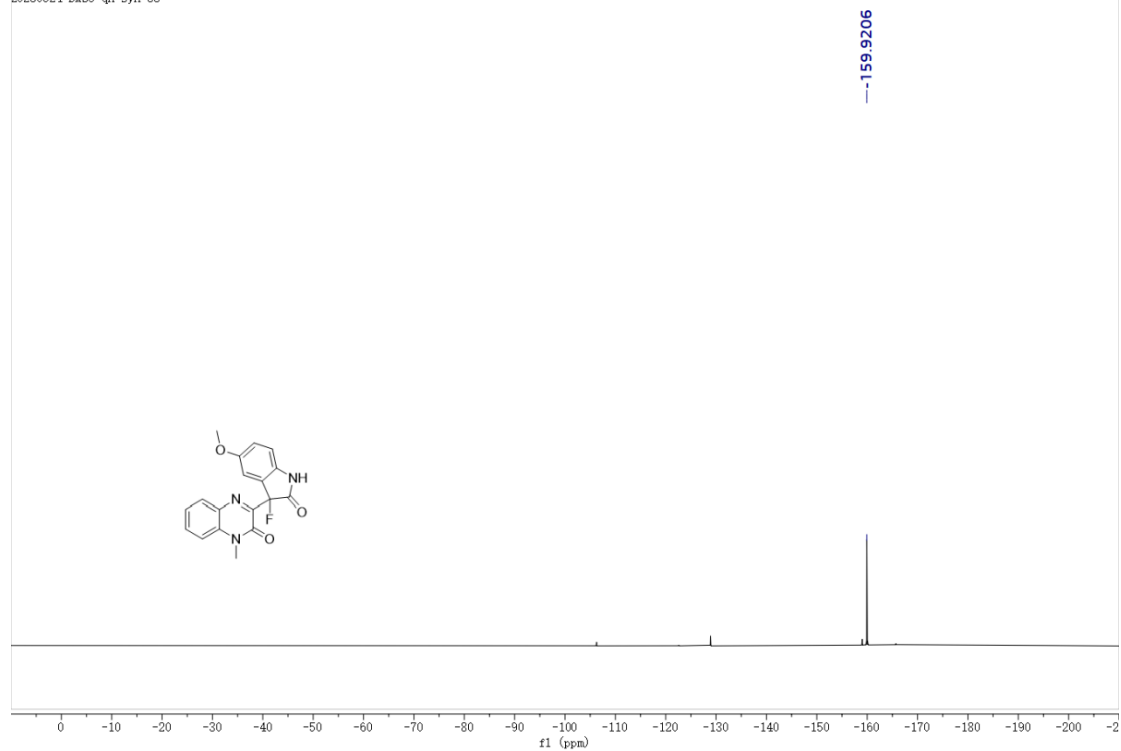

**Figure S59.** The  $^{19}\text{F}$  NMR Spectrum of Compound **3o** in  $\text{DMSO-}d_6$

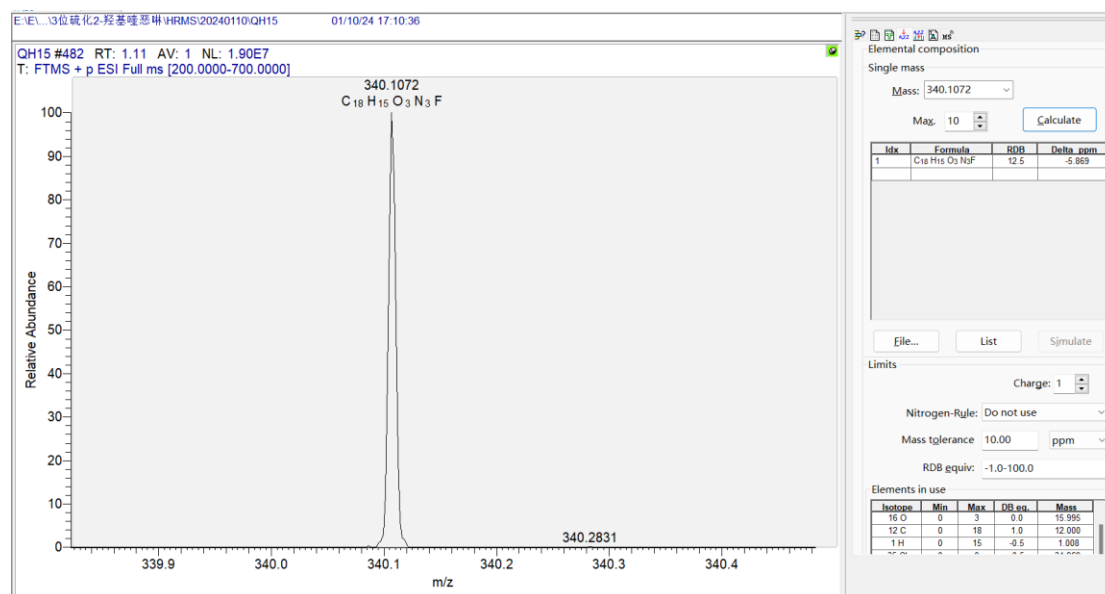

**Figure S60.** The HR-ESI-MS Spectrum of Compound **3o**

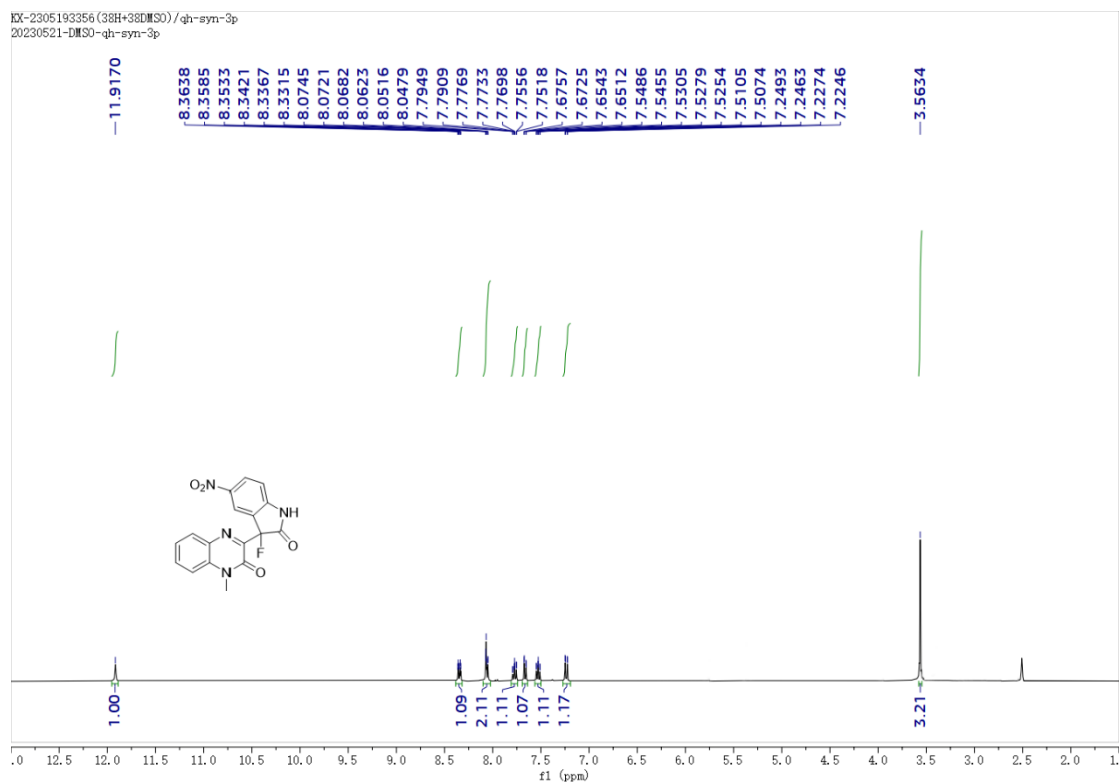

Figure S61. The  $^1\text{H}$  NMR Spectrum of Compound **3p** in  $\text{DMSO-}d_6$

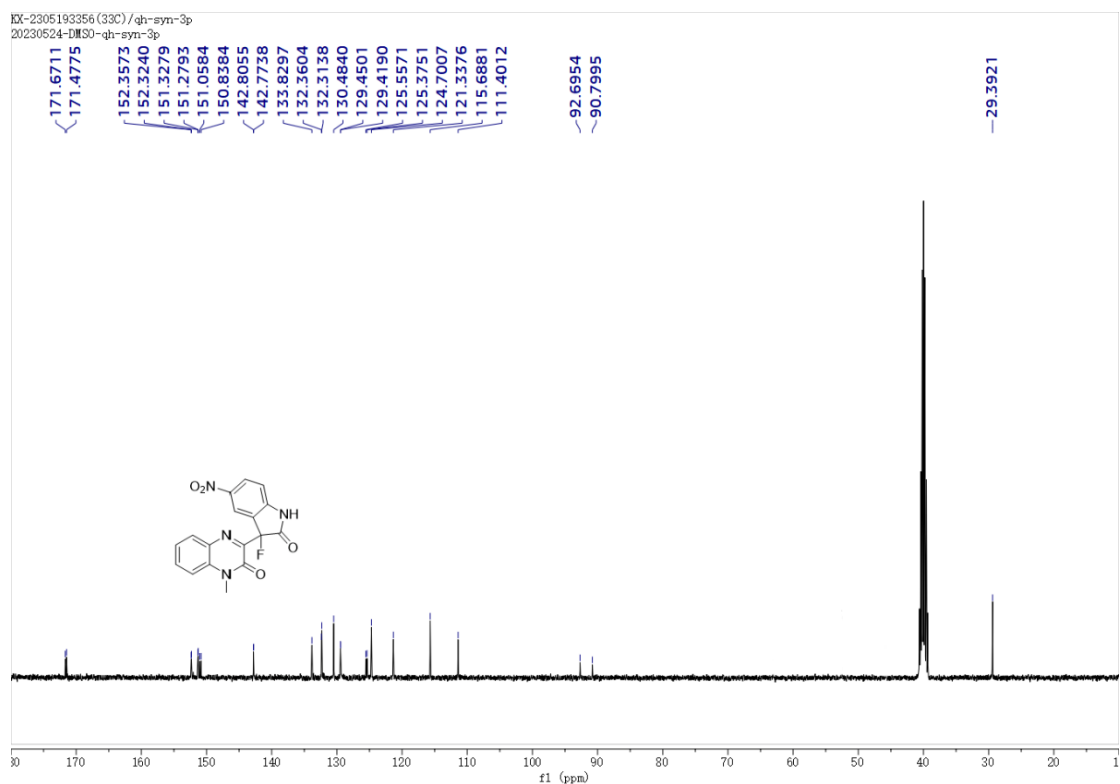

Figure S62. The  $^{13}\text{C}$  NMR Spectrum of Compound **3p** in  $\text{DMSO-}d_6$

KX-2305193356 (20F) / qh-syn-3p  
20230524-DMSO-qh-syn-3p

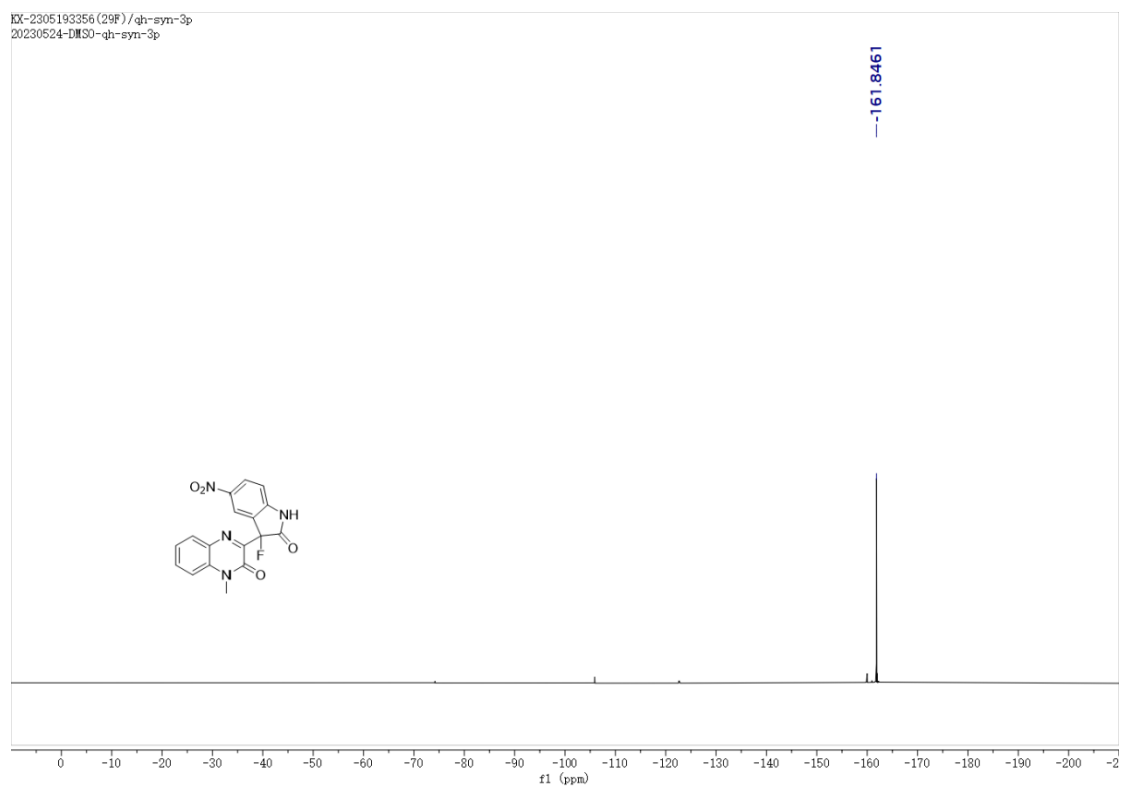

**Figure S63** The  $^{19}\text{F}$  NMR Spectrum of Compound **3p** in  $\text{DMSO-}d_6$

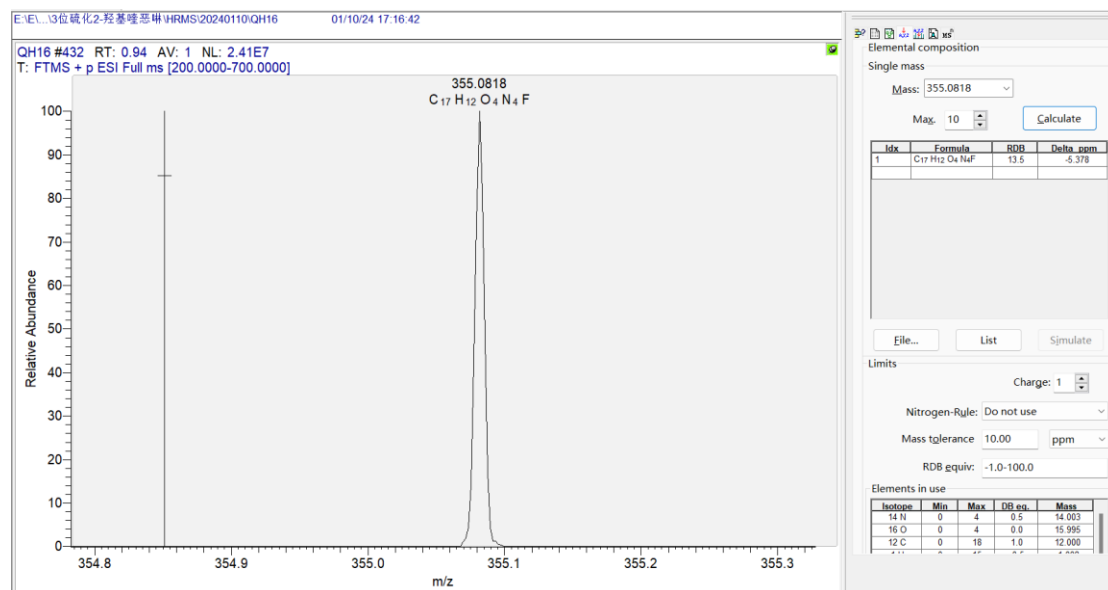

**Figure S64.** The HR-ESI-MS Spectrum of Compound **3p**

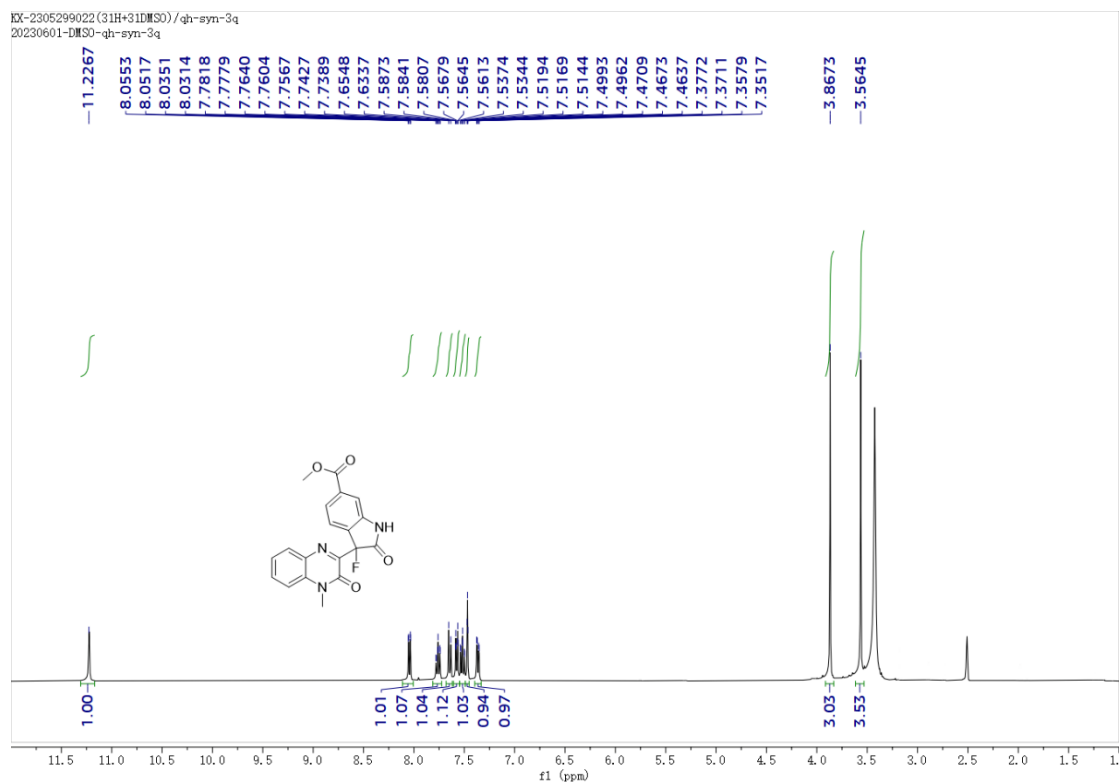

**Figure S65** The  $^1\text{H}$  NMR Spectrum of Compound **3q** in  $\text{DMSO}-d_6$

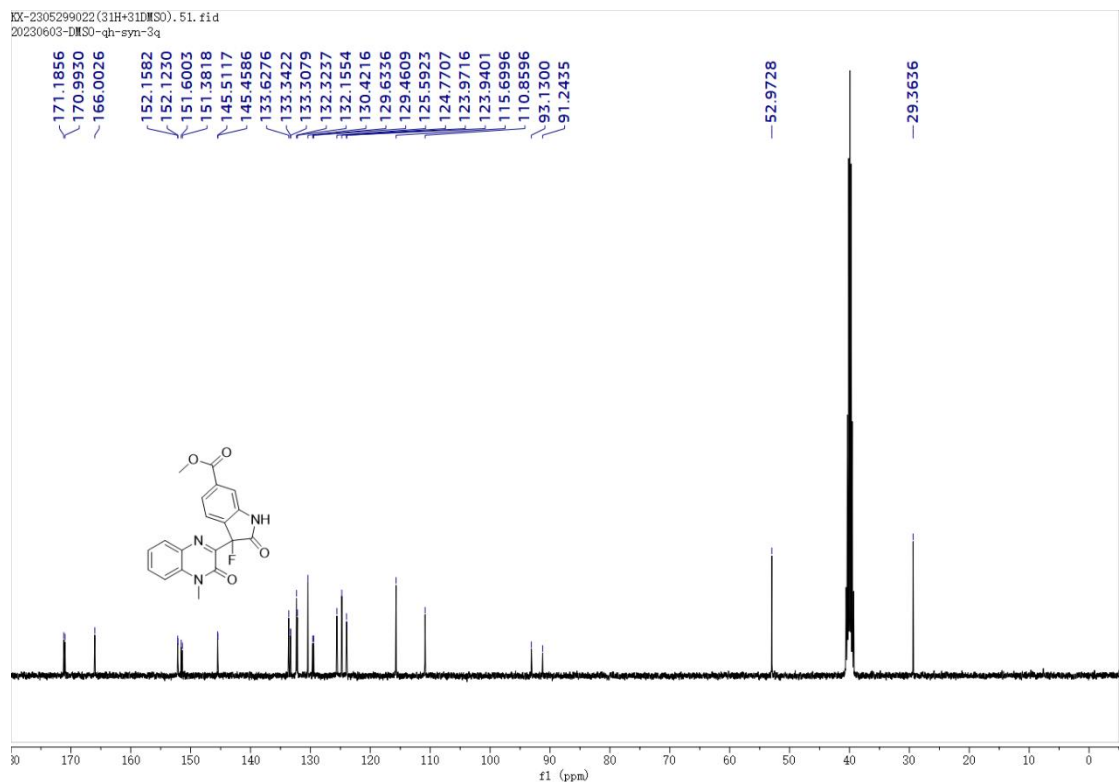

**Figure S66** The  $^{13}\text{C}$  NMR Spectrum of Compound **3q** in  $\text{DMSO}-d_6$

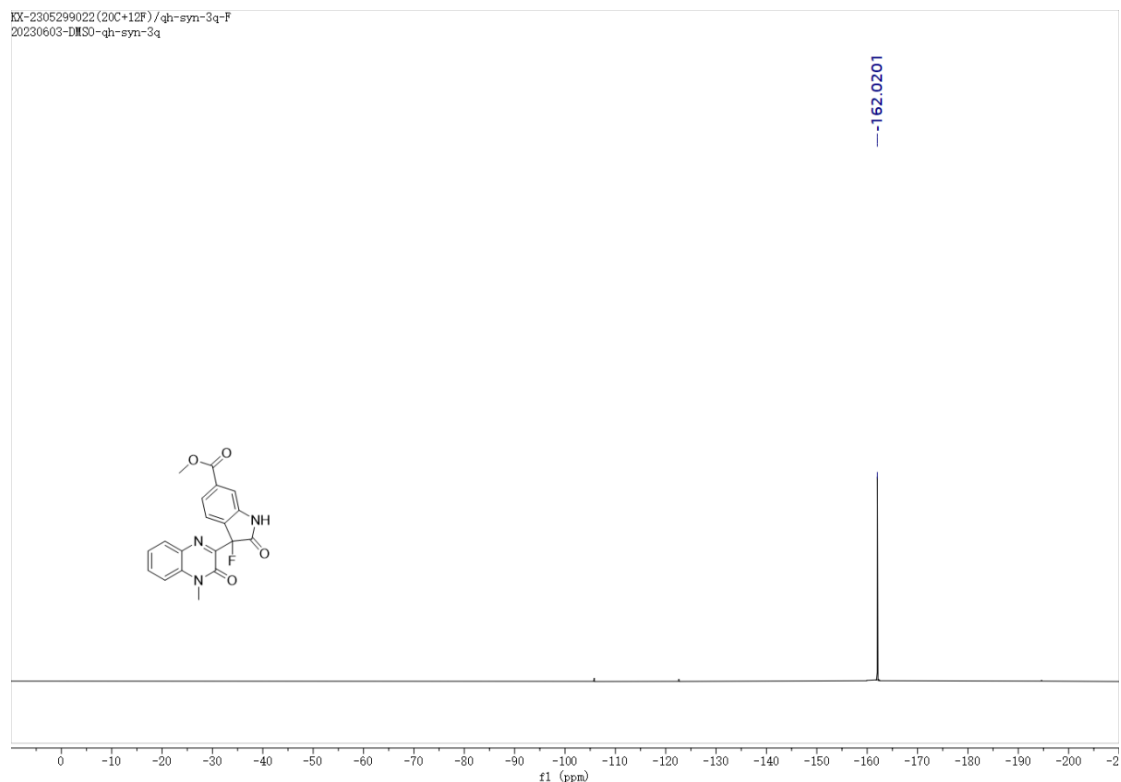

**Figure S67** The  $^{19}\text{F}$  NMR Spectrum of Compound **3q** in  $\text{DMSO-}d_6$

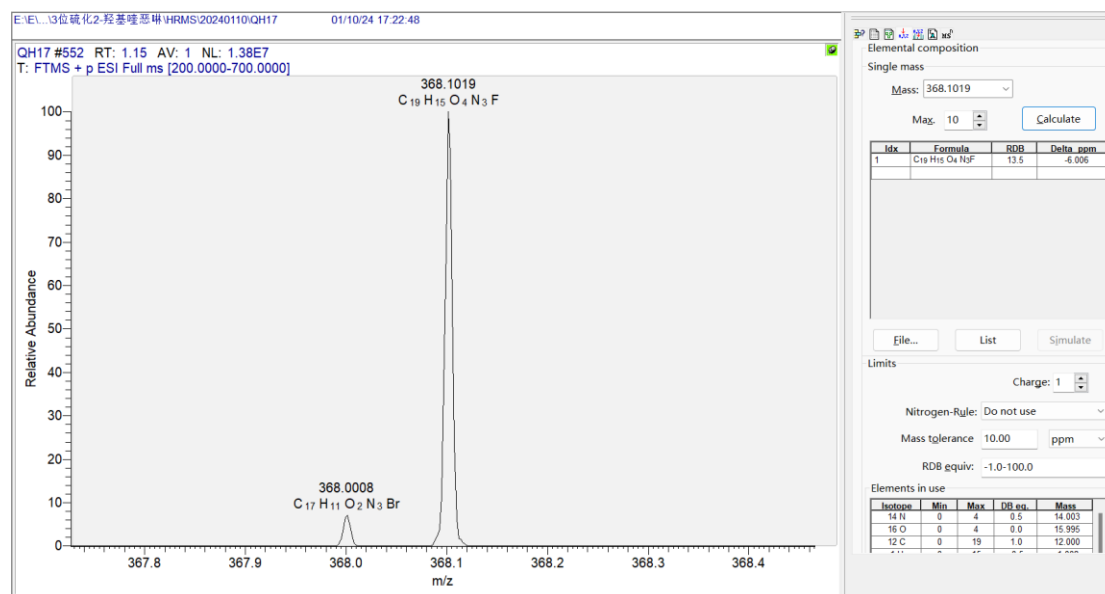

**Figure S68.** The HR-ESI-MS Spectrum of Compound **3q**

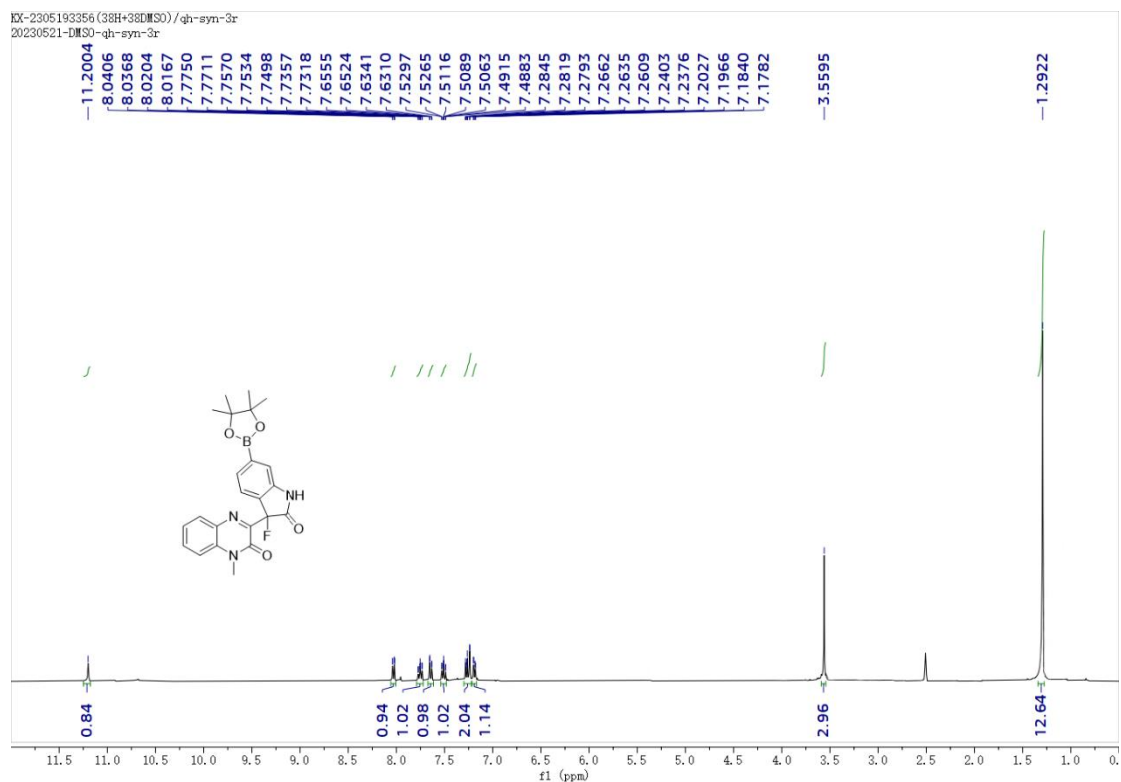

**Figure S69** The  $^1\text{H}$  NMR Spectrum of Compound **3r** in  $\text{DMSO}-d_6$

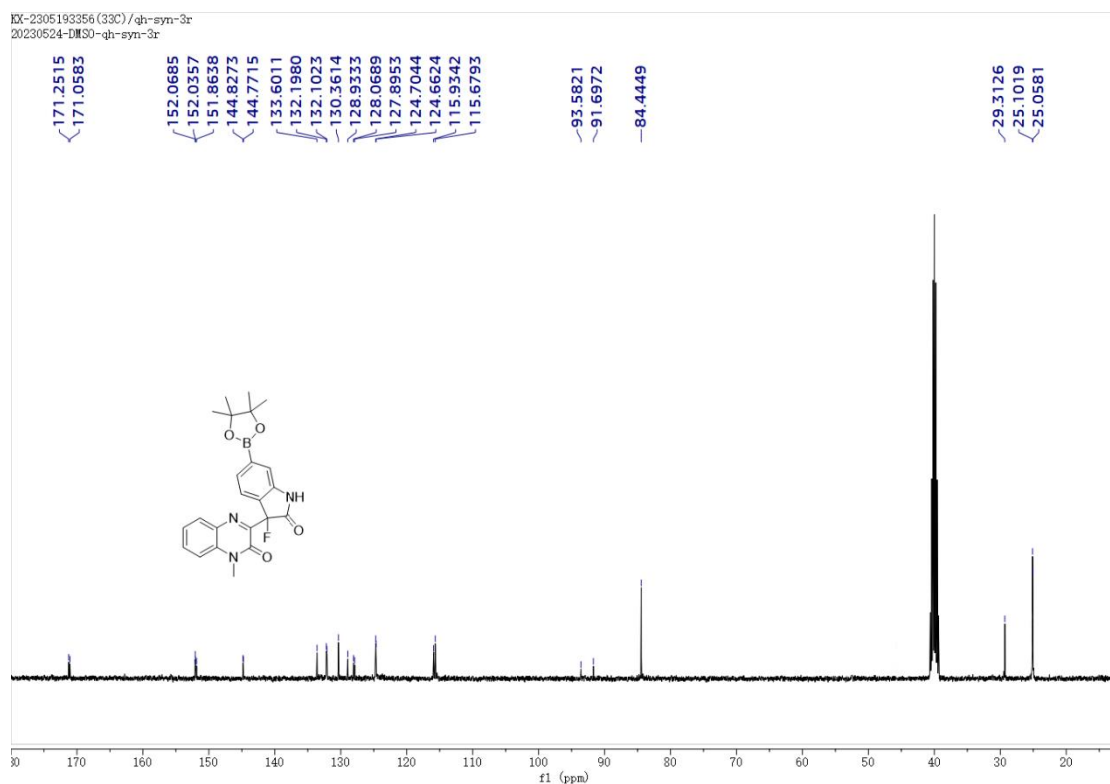

**Figure S70** The  $^{13}\text{C}$  NMR Spectrum of Compound **3r** in  $\text{DMSO}-d_6$

KX-2305193356 (29F) / qh-syn-3r  
20230524-DMSO-qh-syn-3r

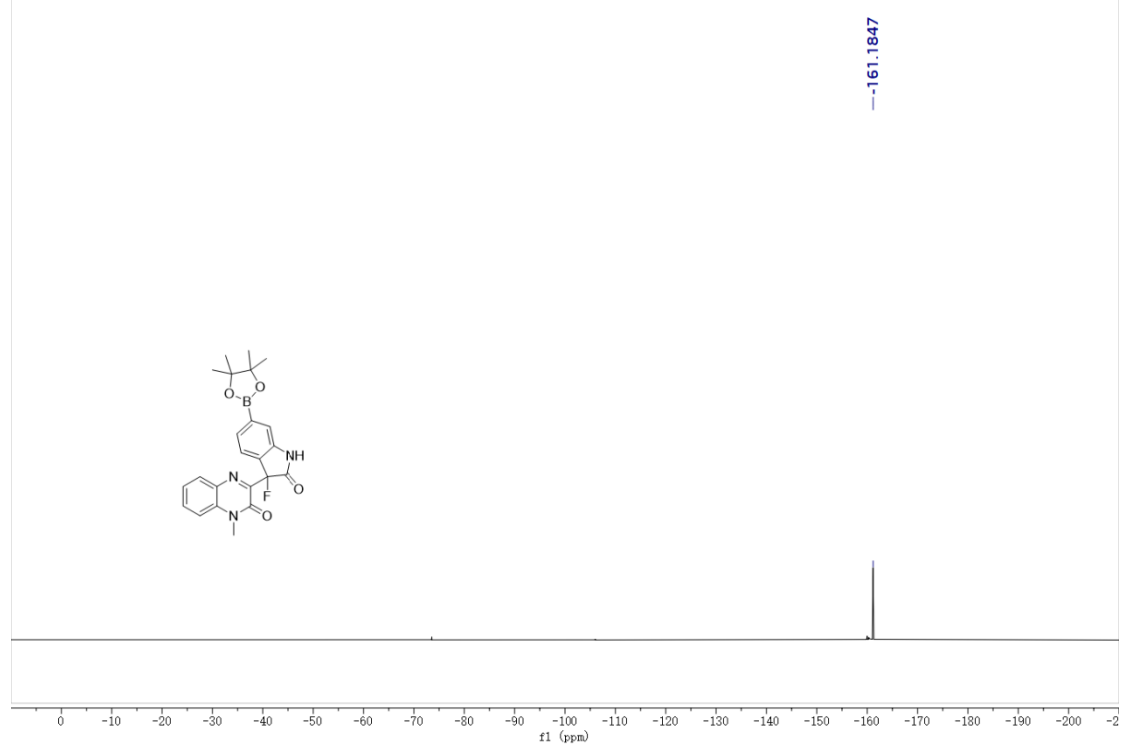

**Figure S71** The  $^{19}\text{F}$  NMR Spectrum of Compound **3r** in  $\text{DMSO-}d_6$

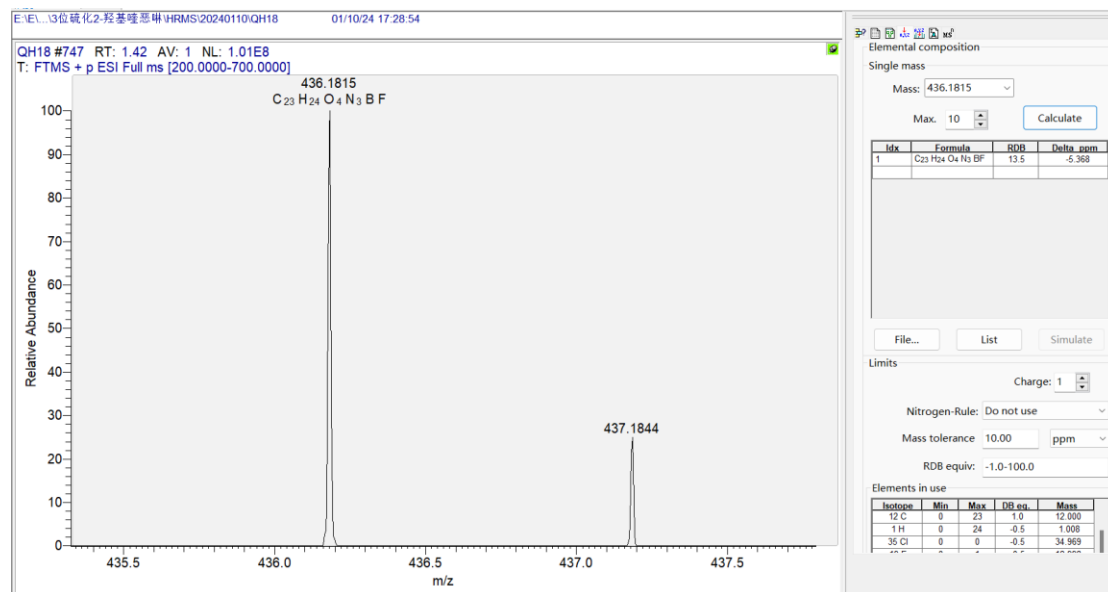

**Figure S72.** The HR-ESI-MS Spectrum of Compound **3r**



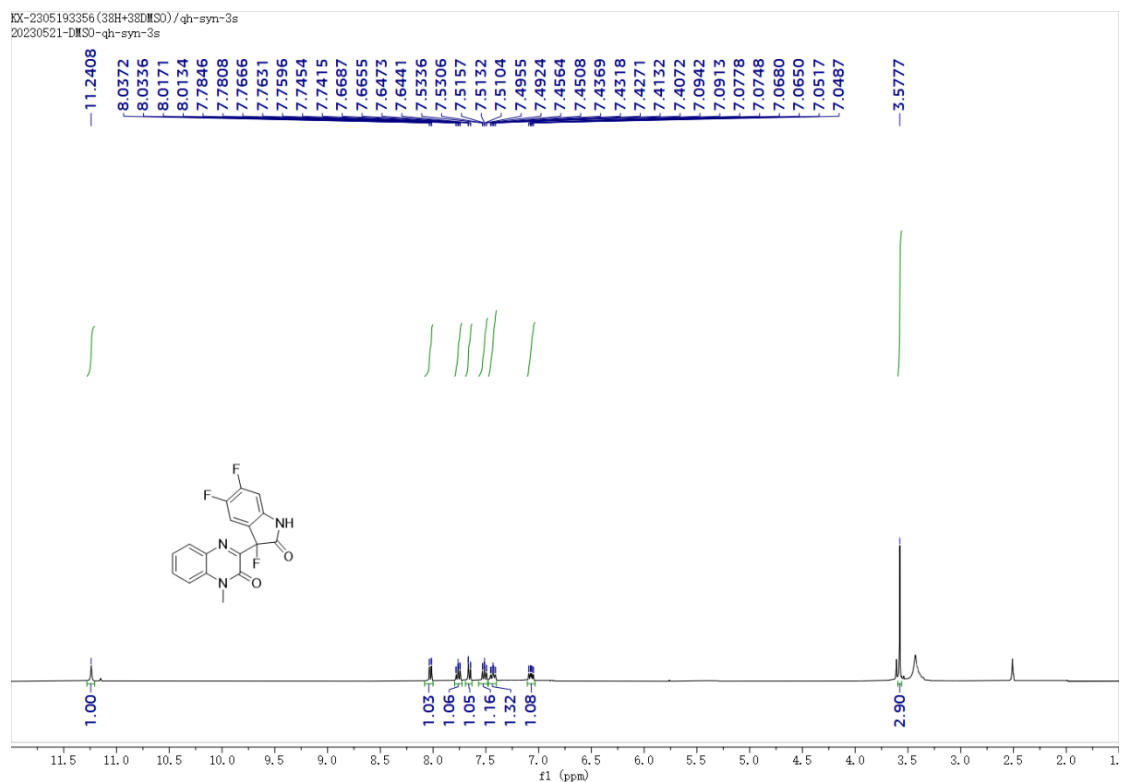

**Figure S73** The  $^1\text{H}$  NMR Spectrum of Compound **3s** in  $\text{DMSO}-d_6$

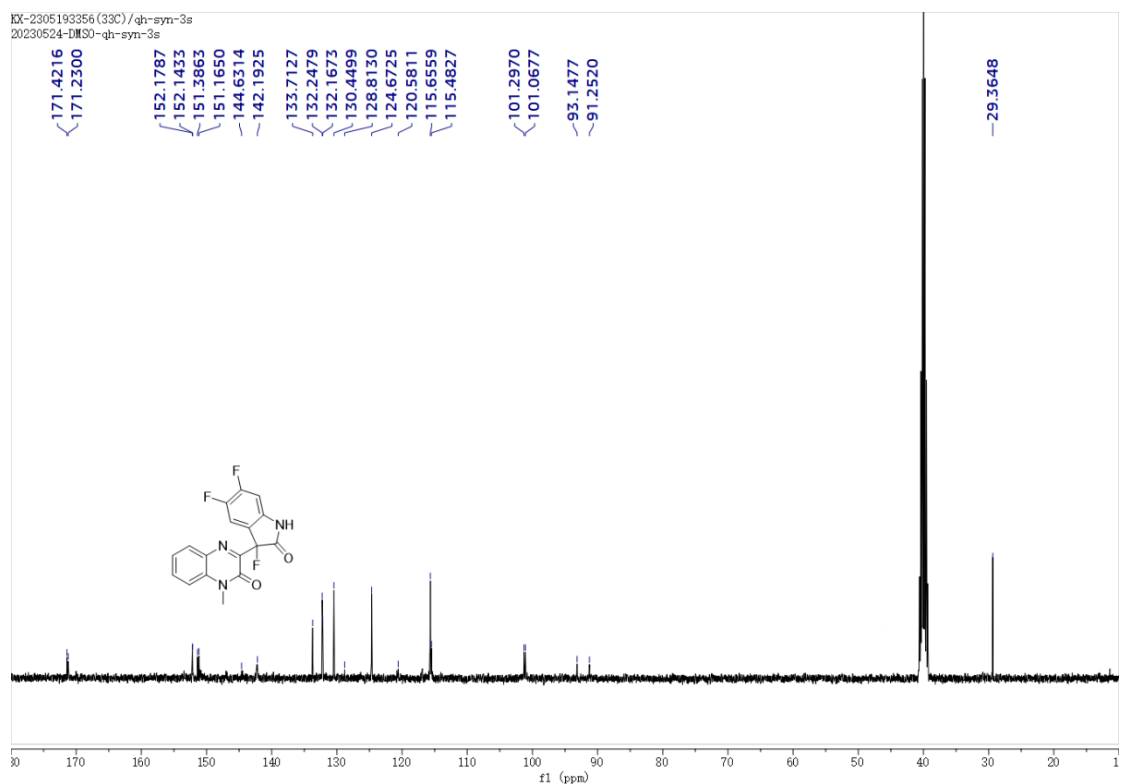

**Figure S74** The  $^{13}\text{C}$  NMR Spectrum of Compound **3s** in  $\text{DMSO}-d_6$

KX-2305193356 (29F) / gh-syn-3s  
20230524-DMSO-gh-syn-3s

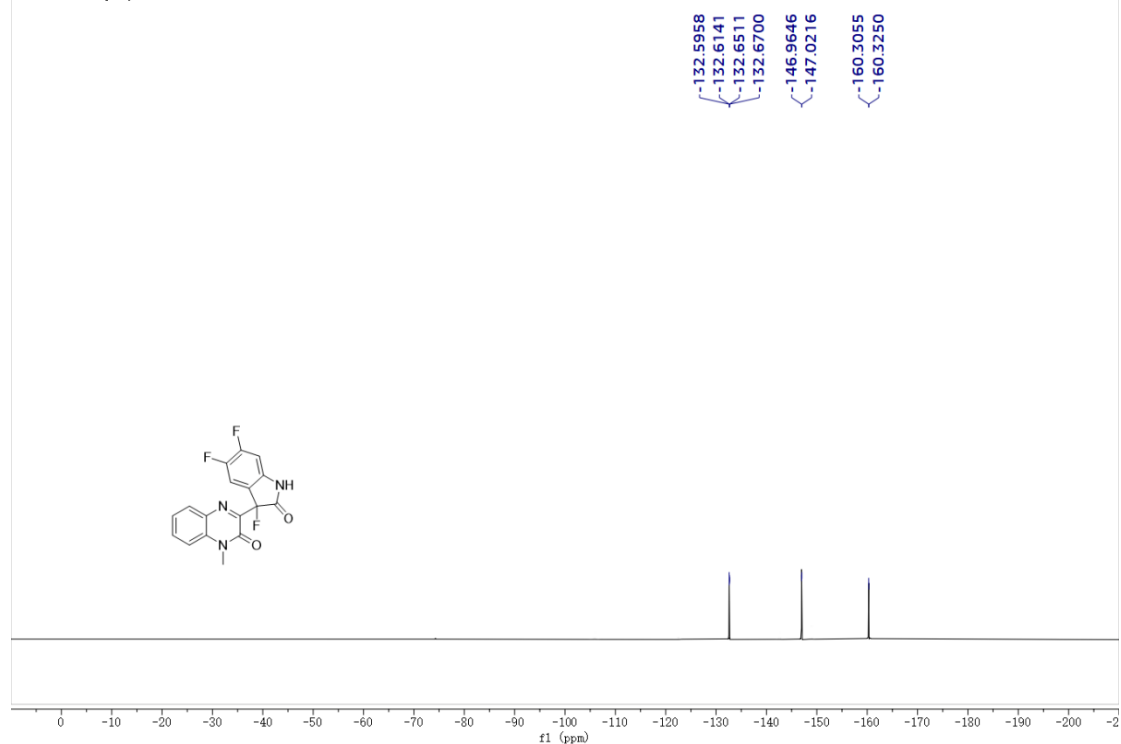

**Figure S75** The  $^{19}\text{F}$  NMR Spectrum of Compound **3s** in  $\text{DMSO}-d_6$

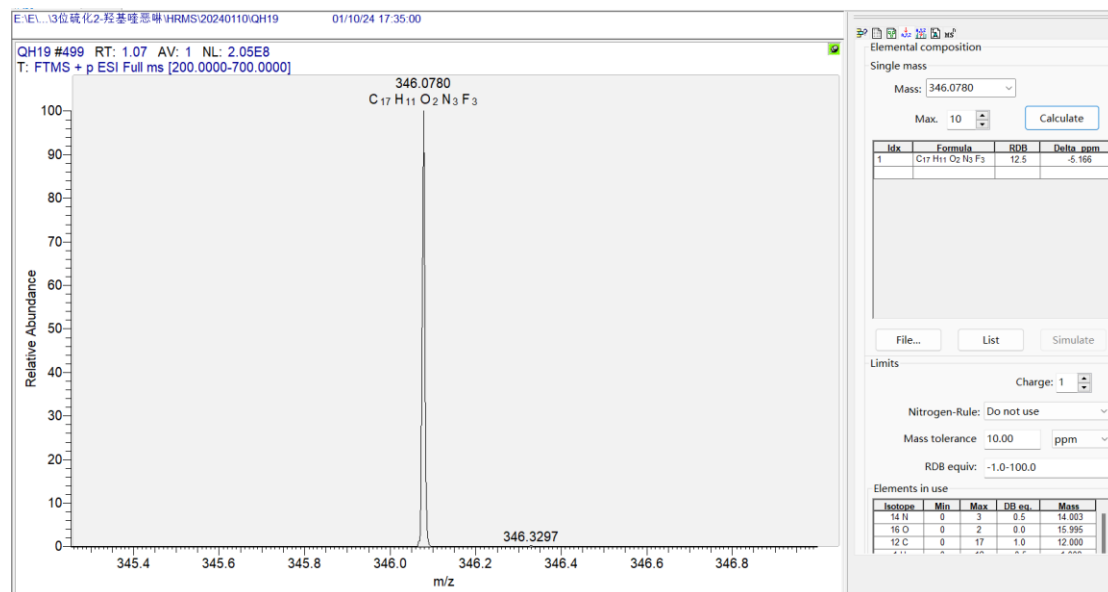

**Figure S76.** The HR-ESI-MS Spectrum of Compound **3s**

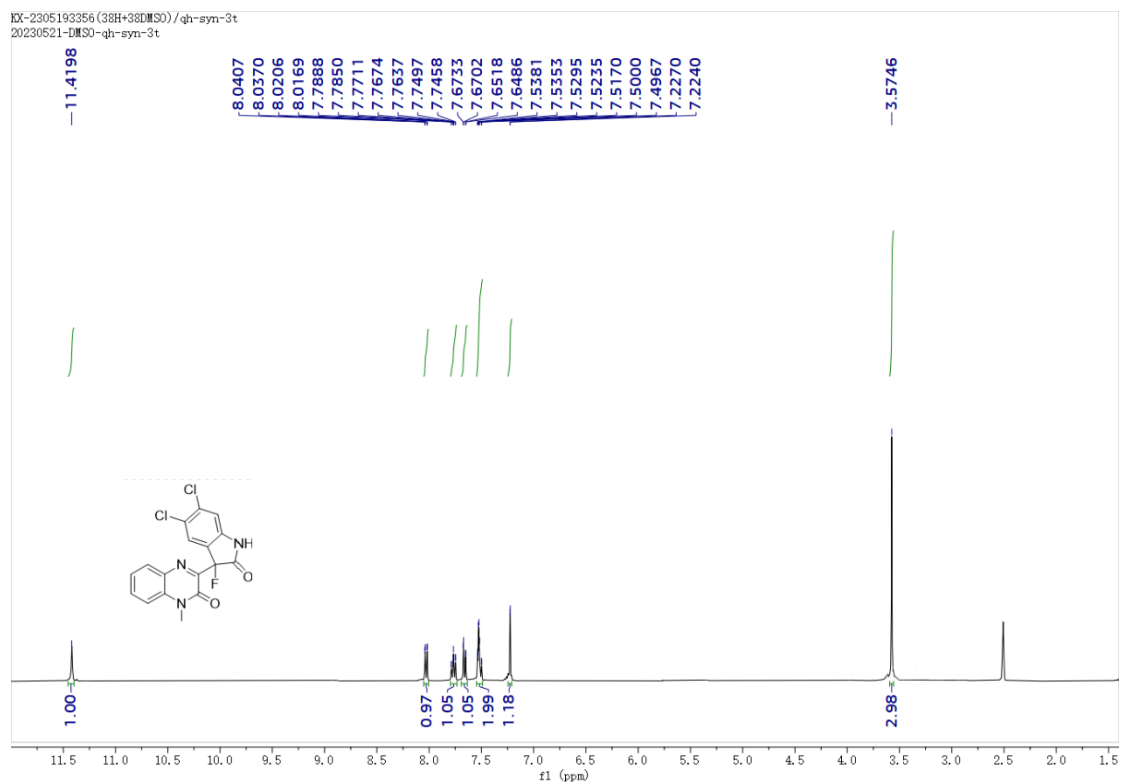

**Figure S77** The <sup>1</sup>H NMR Spectrum of Compound **3t** in DMSO-*d*<sub>6</sub>

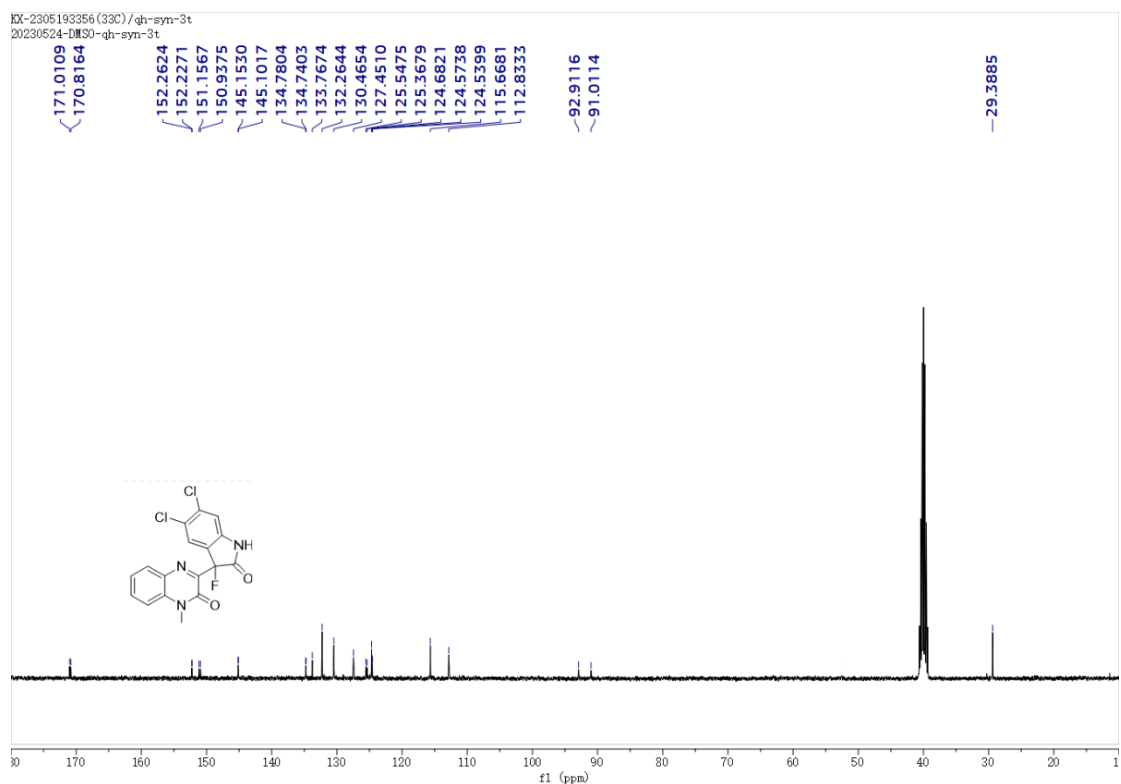

**Figure S78** The <sup>13</sup>C NMR Spectrum of Compound **3t** in DMSO-*d*<sub>6</sub>

KX-2305193356 (29F) / qh-syn-3t  
20230524-DMSO-qh-syn-3t

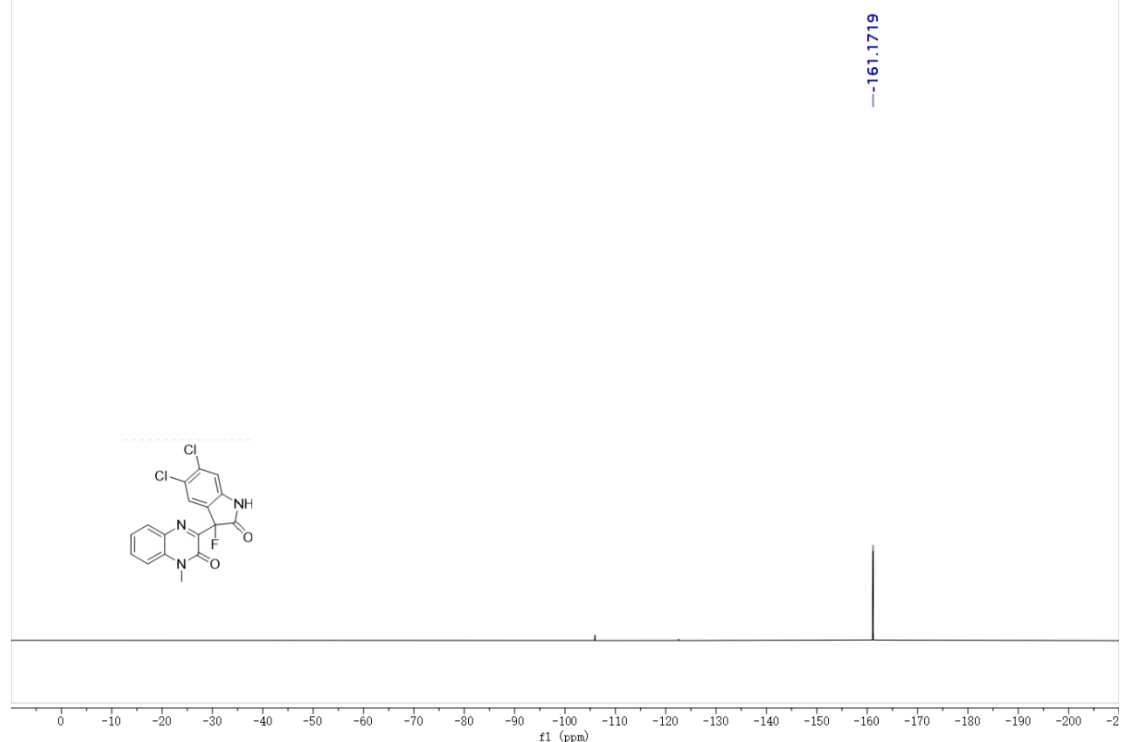

**Figure S79** The  $^{19}\text{F}$  NMR Spectrum of Compound **3t** in  $\text{DMSO}-d_6$

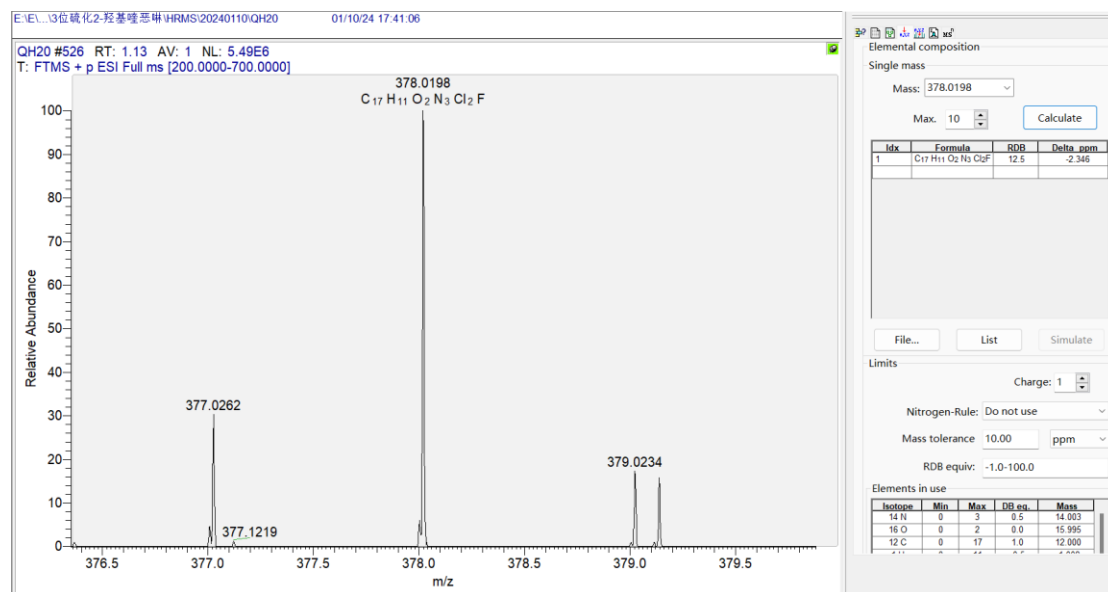

**Figure S80.** The HR-ESI-MS Spectrum of Compound **3t**

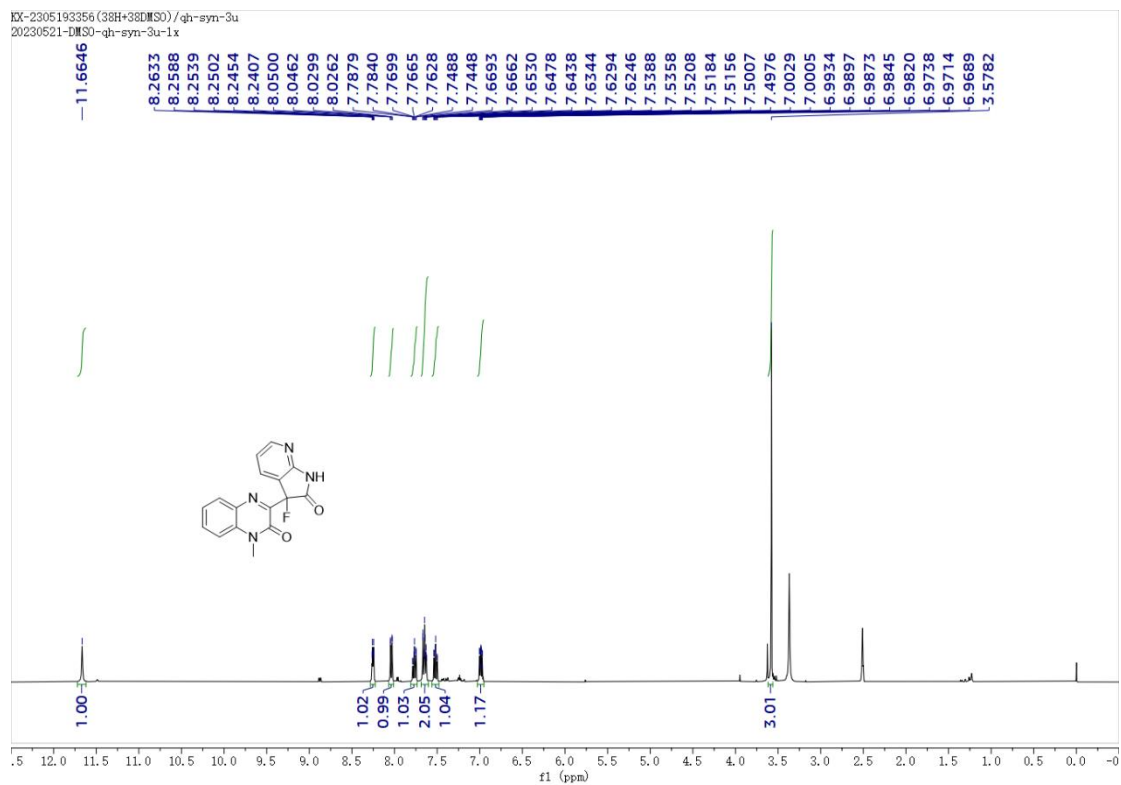

Figure S81 The  $^1\text{H}$  NMR Spectrum of Compound **3u** in  $\text{DMSO-}d_6$

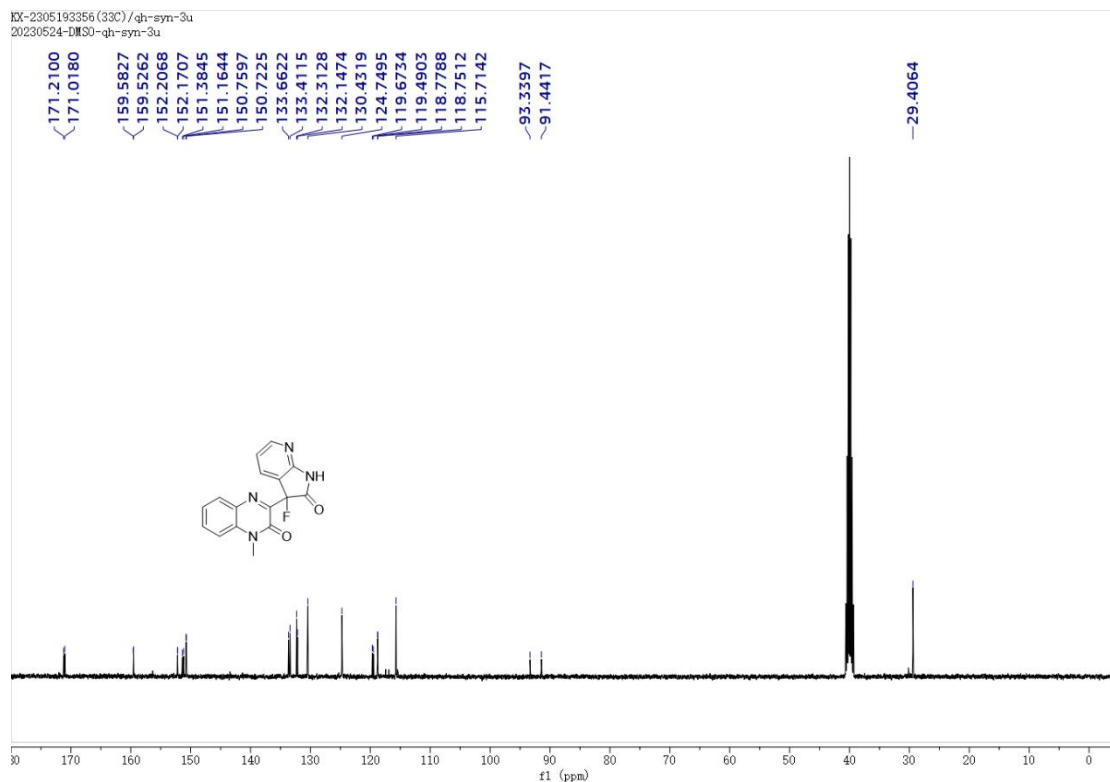

Figure S82 The  $^{13}\text{C}$  NMR Spectrum of Compound **3u** in  $\text{DMSO-}d_6$

KX-2305193356 (29F) / qh-syn-3u  
20230524-DMSO-qh-syn-3u

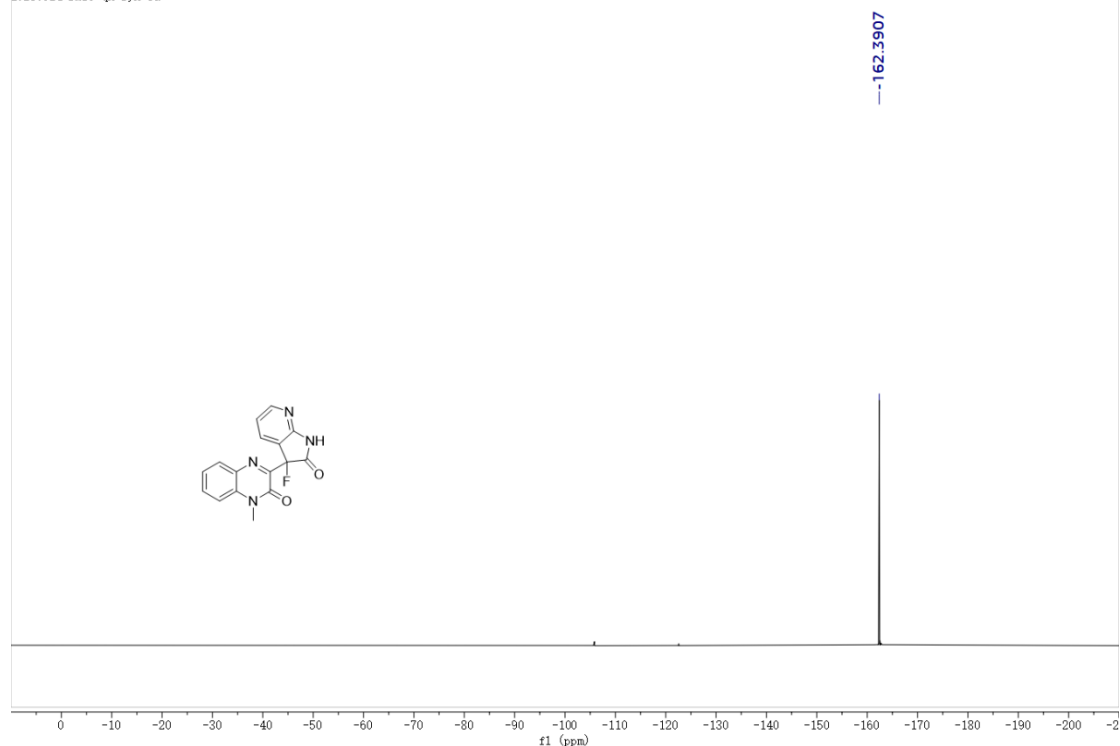

**Figure S83** The  $^{19}\text{F}$  NMR Spectrum of Compound **3u** in  $\text{DMSO-}d_6$

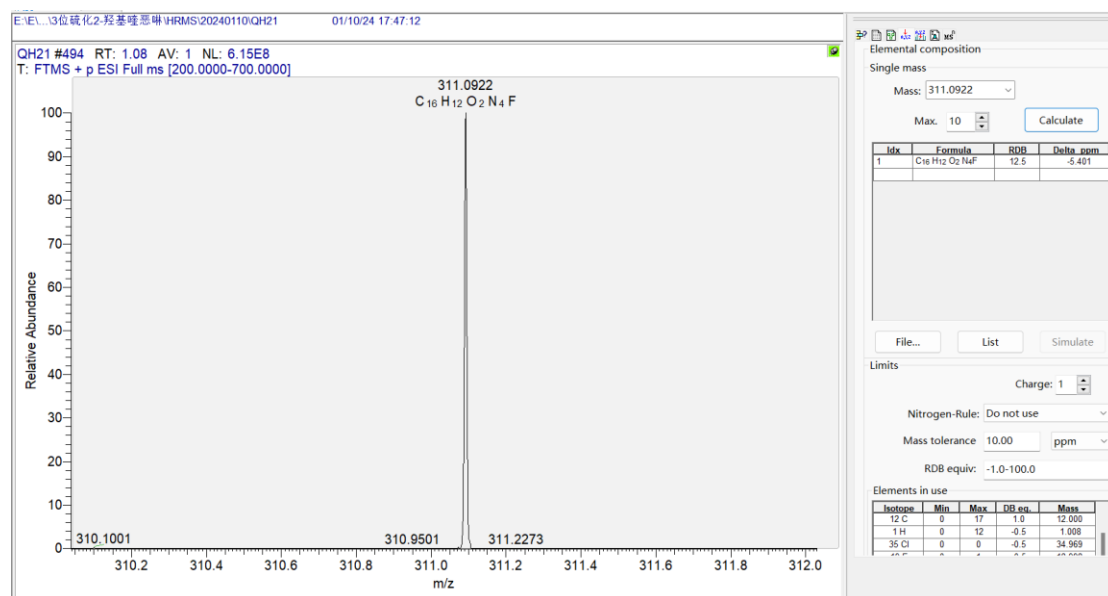

**Figure S84.** The HR-ESI-MS Spectrum of Compound **3u**

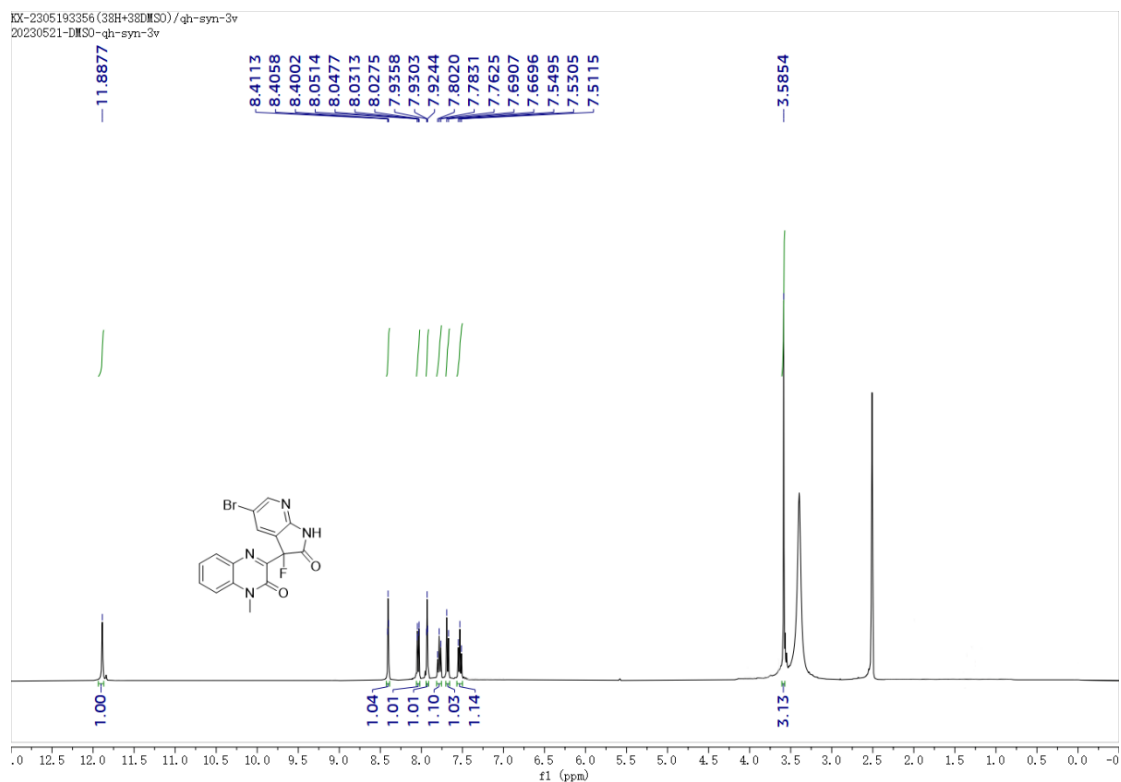

**Figure S85** The  $^1\text{H}$  NMR Spectrum of Compound **3v** in  $\text{DMSO-}d_6$

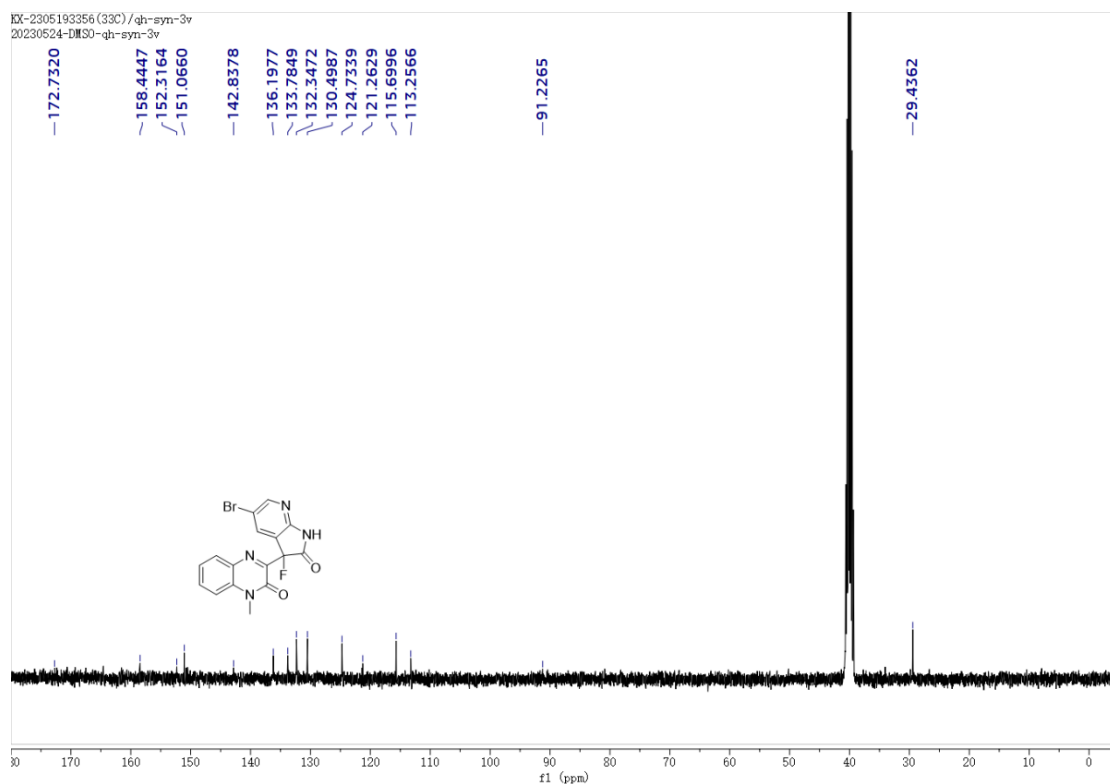

**Figure S86** The  $^{13}\text{C}$  NMR Spectrum of Compound **3v** in  $\text{DMSO-}d_6$

KX-2305193356 (29F) / qh-syn-3v  
20230524-DMSO-qh-syn-3v

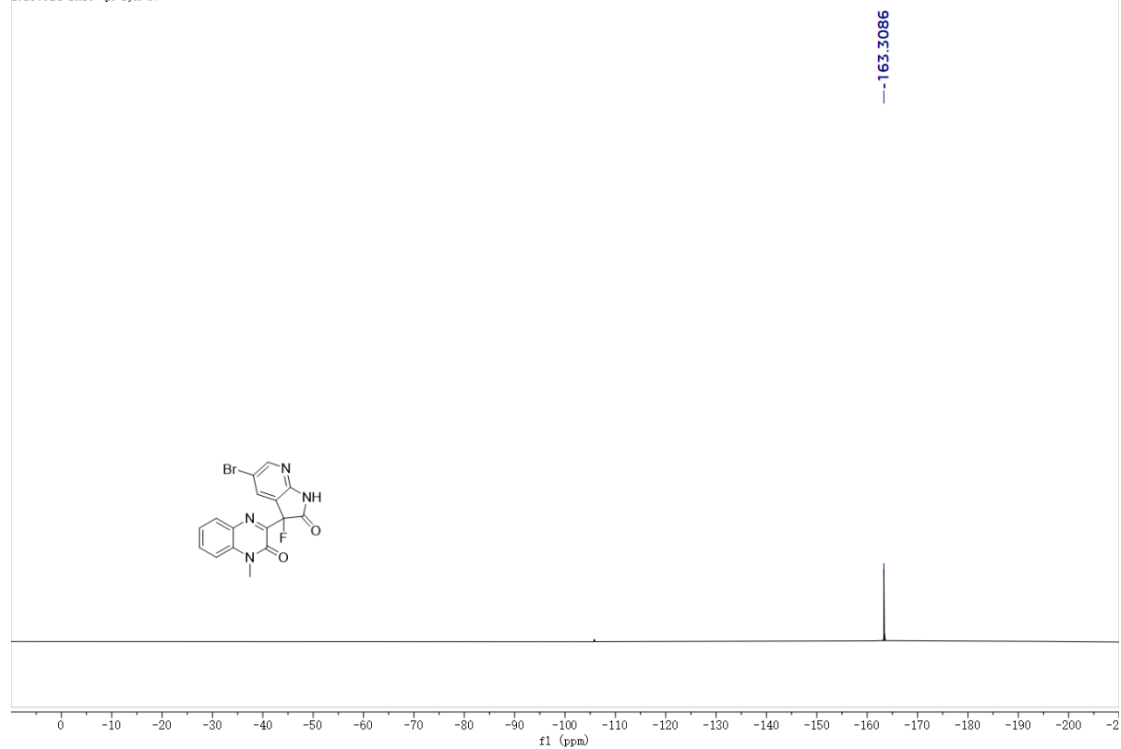

**Figure S87** The  $^{19}\text{F}$  NMR Spectrum of Compound **3v** in  $\text{DMSO-}d_6$

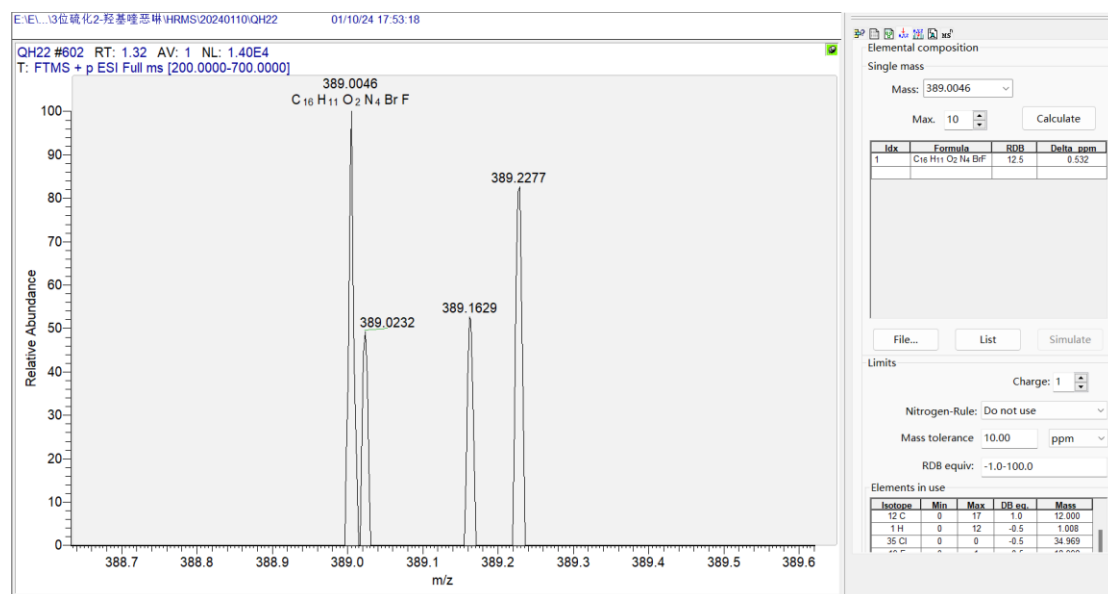

**Figure S88.** The HR-ESI-MS Spectrum of Compound **3v**



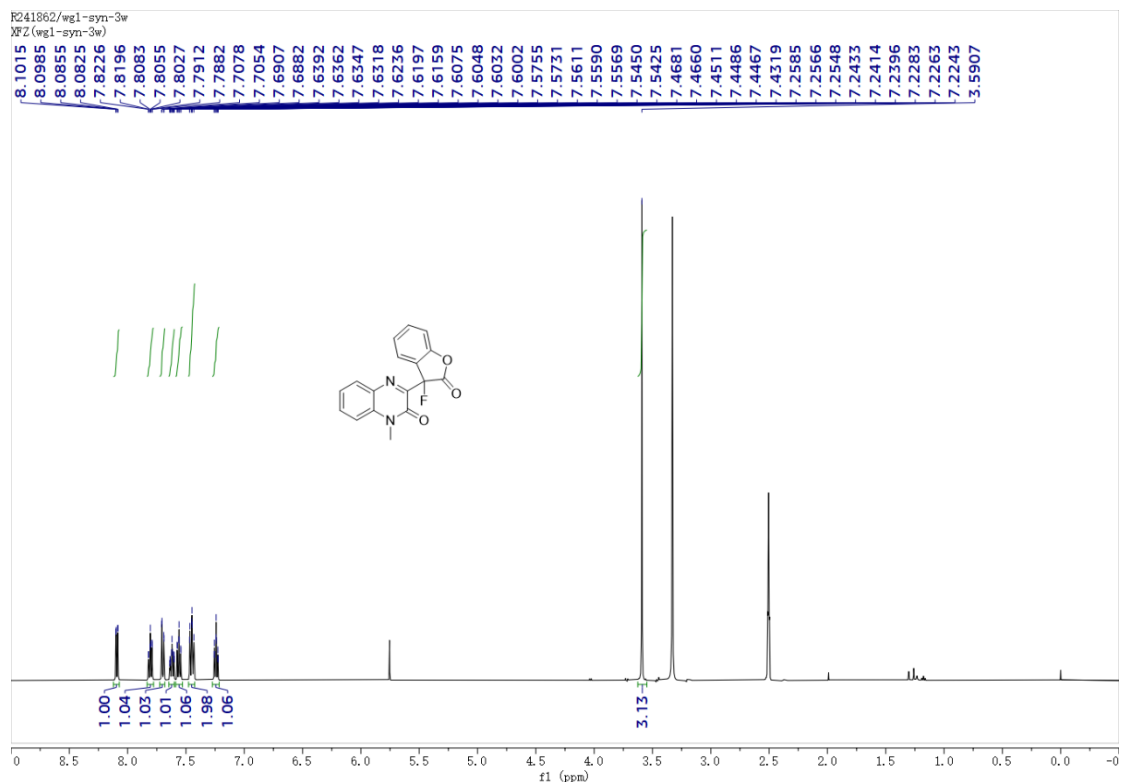

Figure S89 The  $^1\text{H}$  NMR Spectrum of Compound 3w in  $\text{DMSO}-d_6$

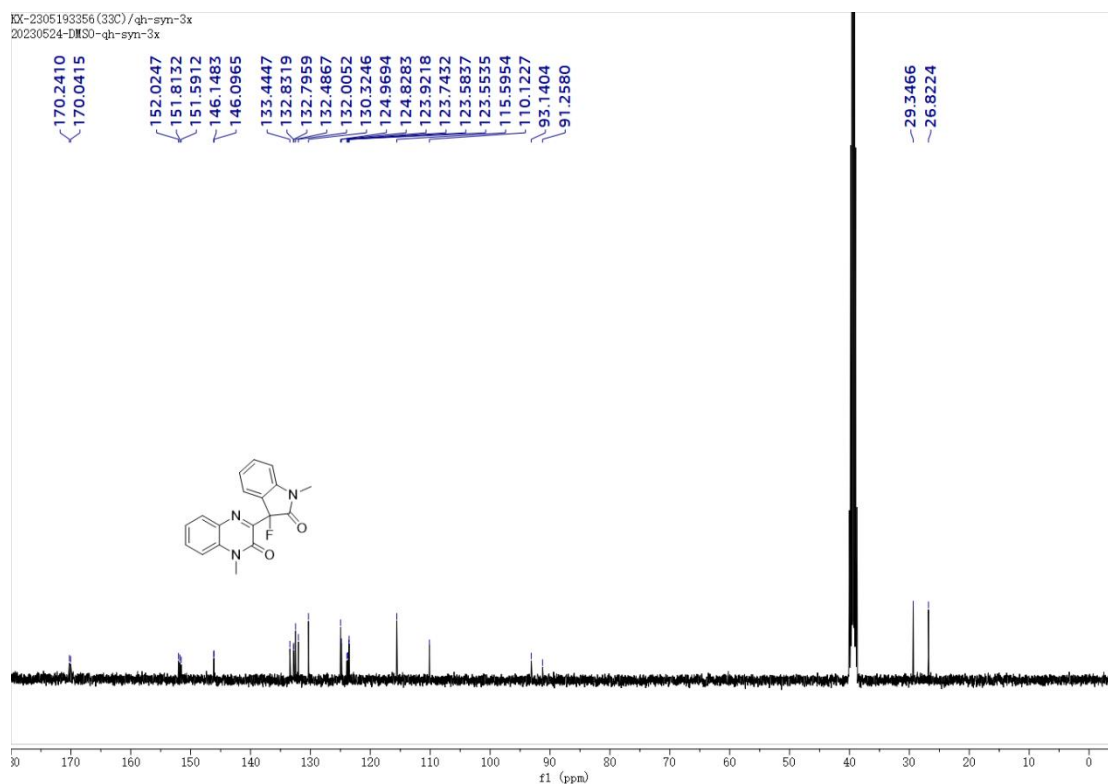

Figure S90 The  $^{13}\text{C}$  NMR Spectrum of Compound 3w in  $\text{DMSO}-d_6$

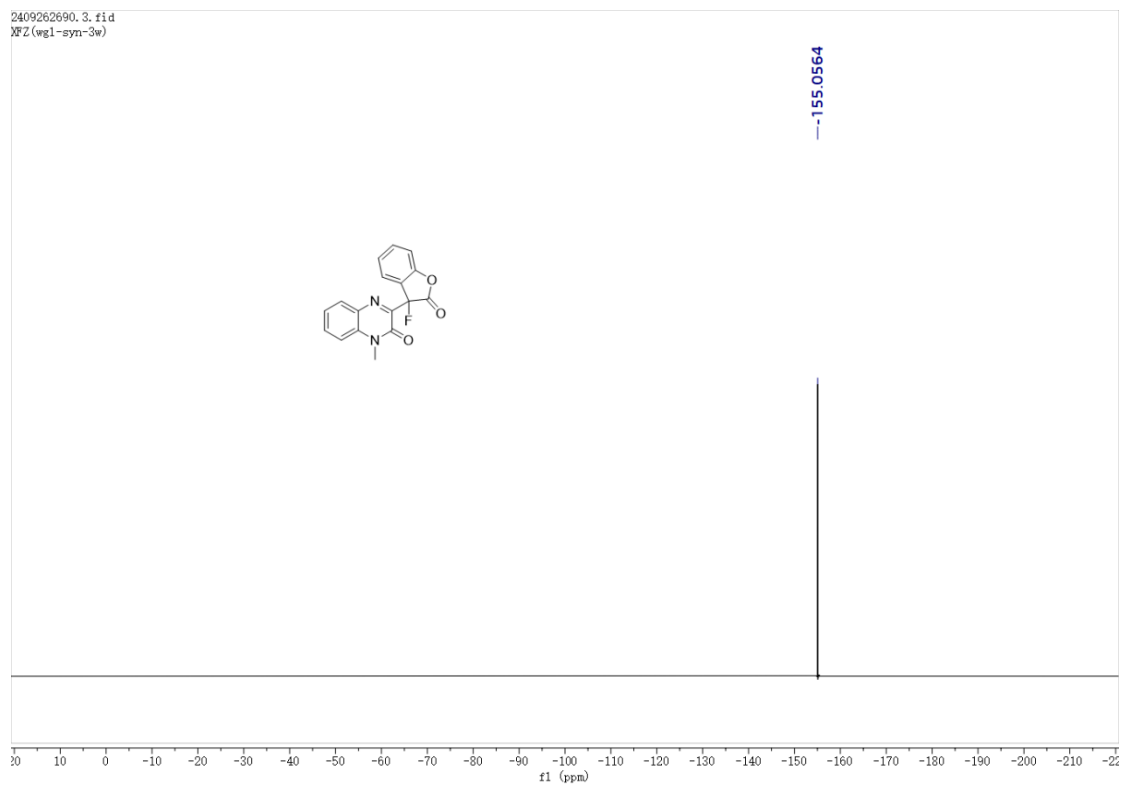

**Figure S91** The  $^{19}\text{F}$  NMR Spectrum of Compound **3w** in  $\text{DMSO-}d_6$

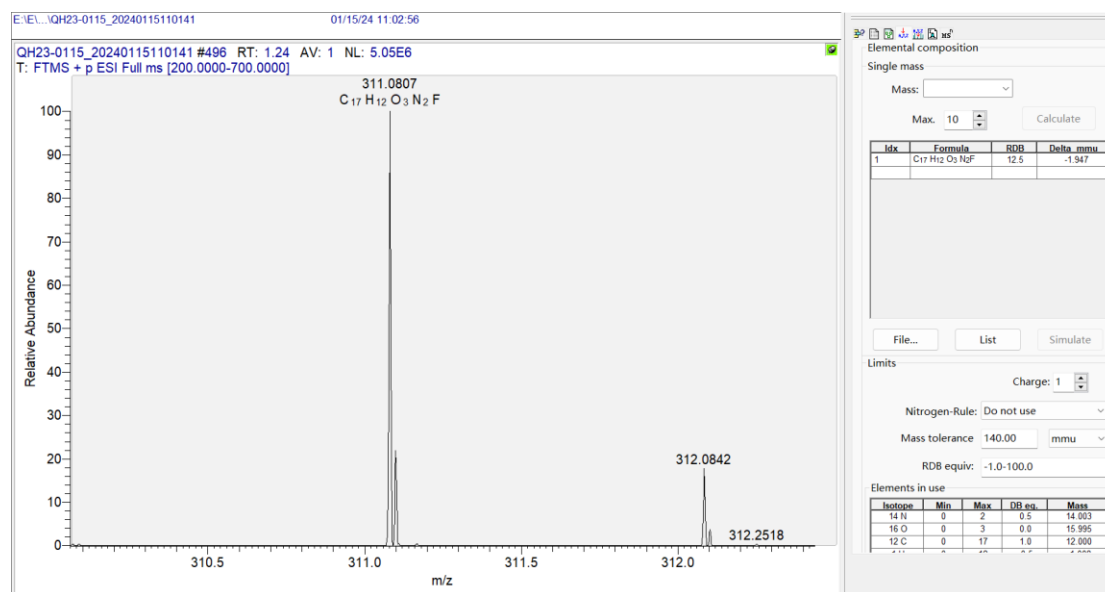

**Figure S92.** The HR-ESI-MS Spectrum of Compound **3w**

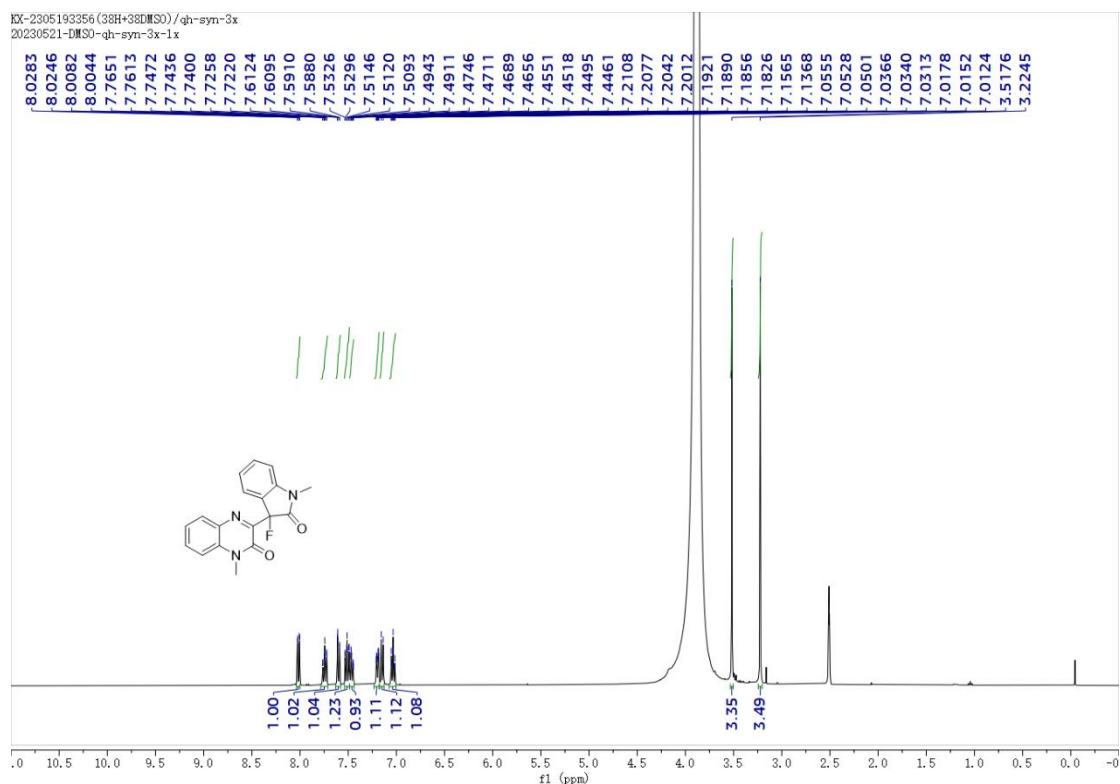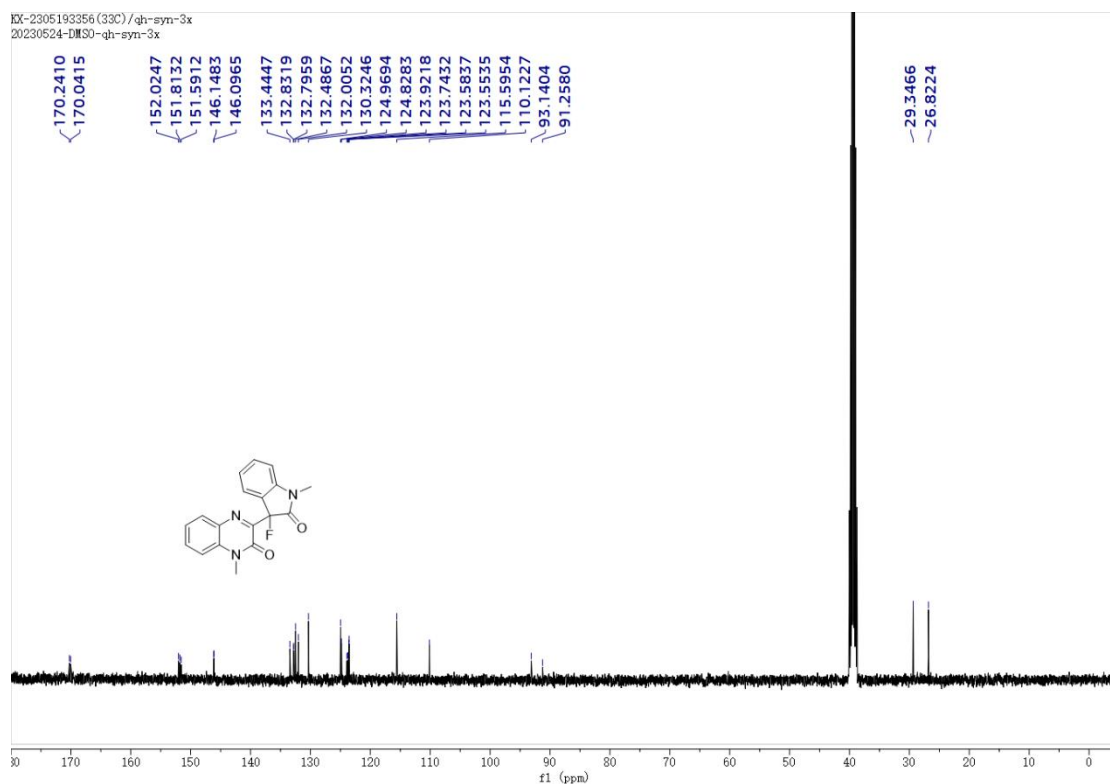

KX-2305193356 (29F) / qh-syn-3x  
20230524-DMSO-qh-syn-3x

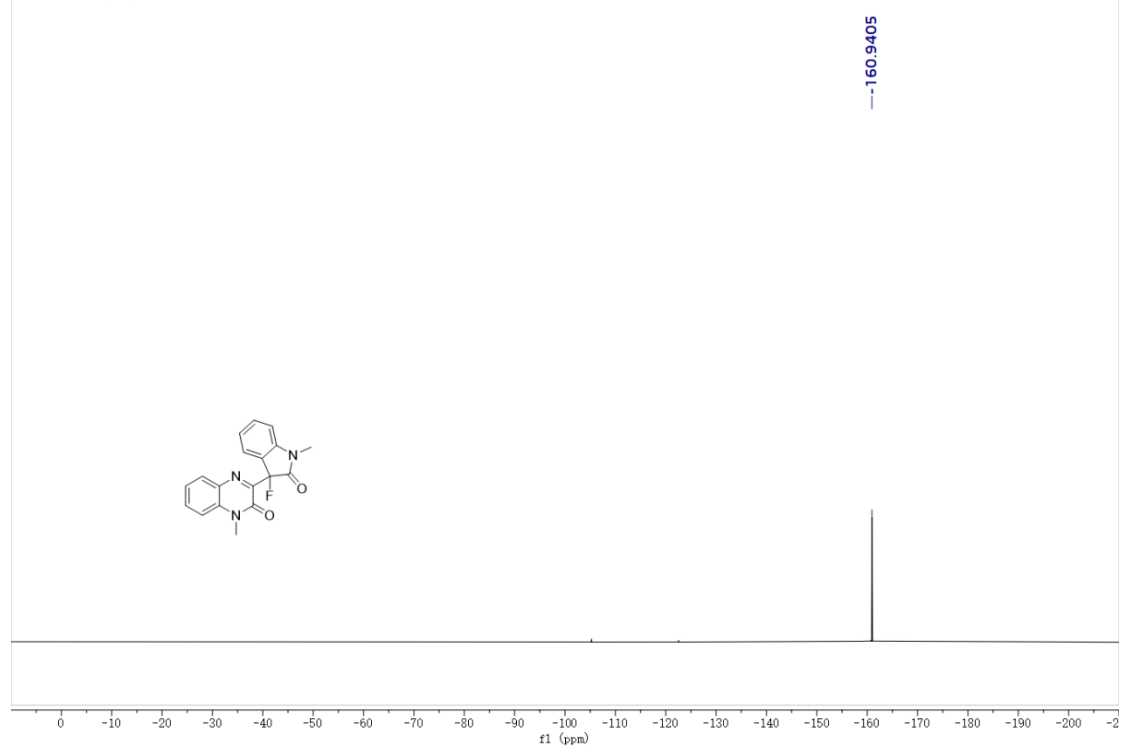

**Figure S95** The  $^{19}\text{F}$  NMR Spectrum of Compound **3x** in  $\text{DMSO-}d_6$

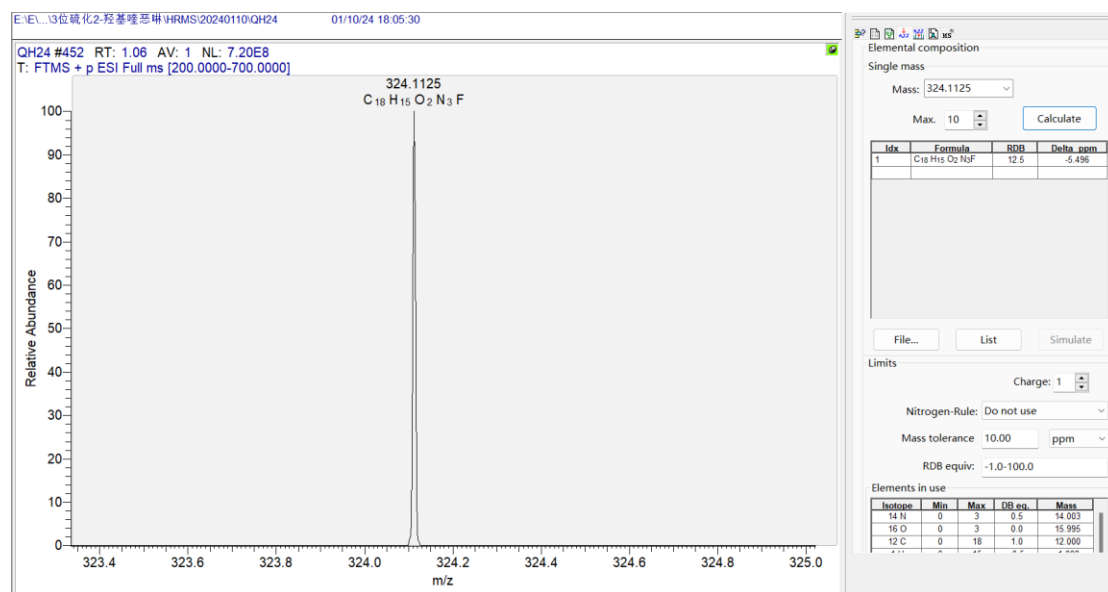

**Figure S96.** The HR-ESI-MS Spectrum of Compound **3x**

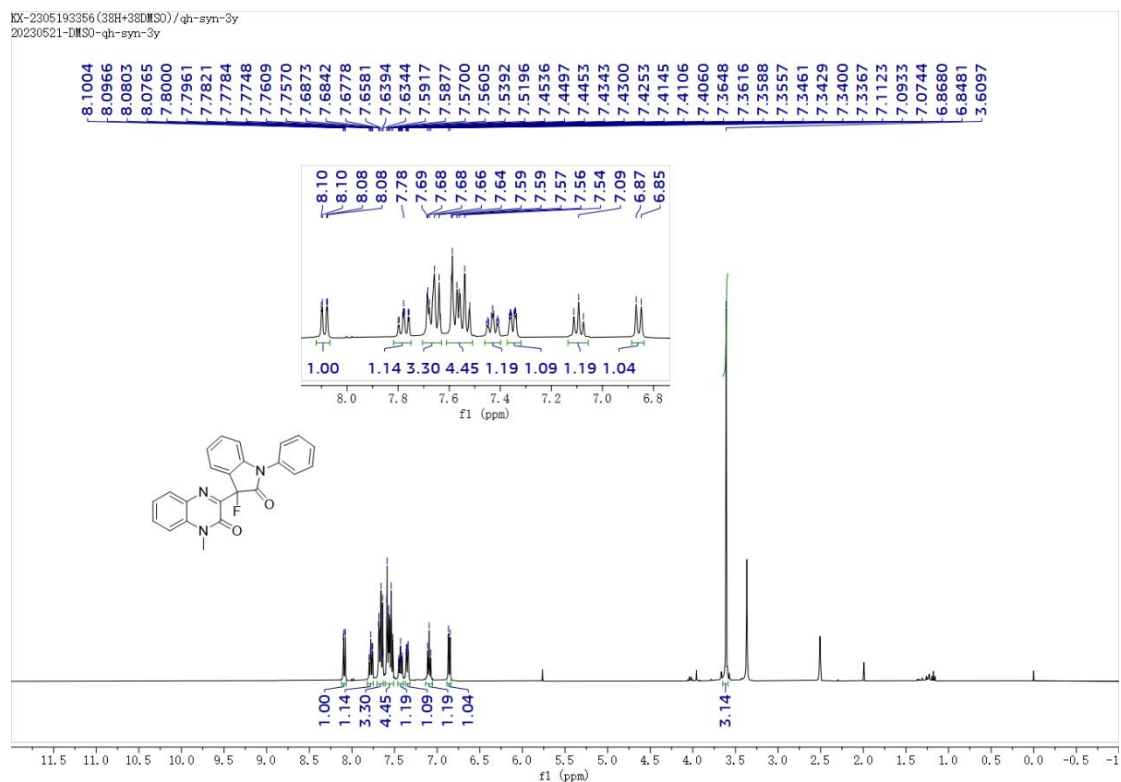

**Figure S97** The <sup>1</sup>H NMR Spectrum of Compound 3y in DMSO-*d*<sub>6</sub>

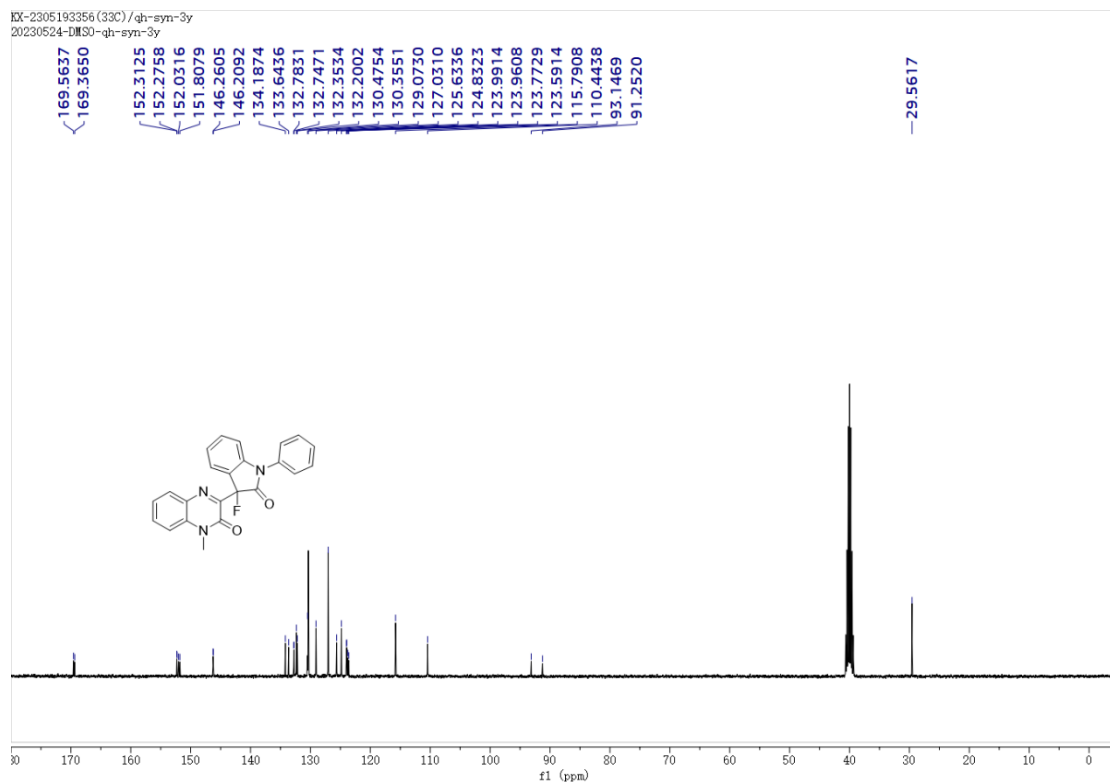

**Figure S98** The <sup>13</sup>C NMR Spectrum of Compound 3y in DMSO-*d*<sub>6</sub>

KX-2305193356 (29F) / qh-syn-3y  
20230524-DMSO-qh-syn-3y

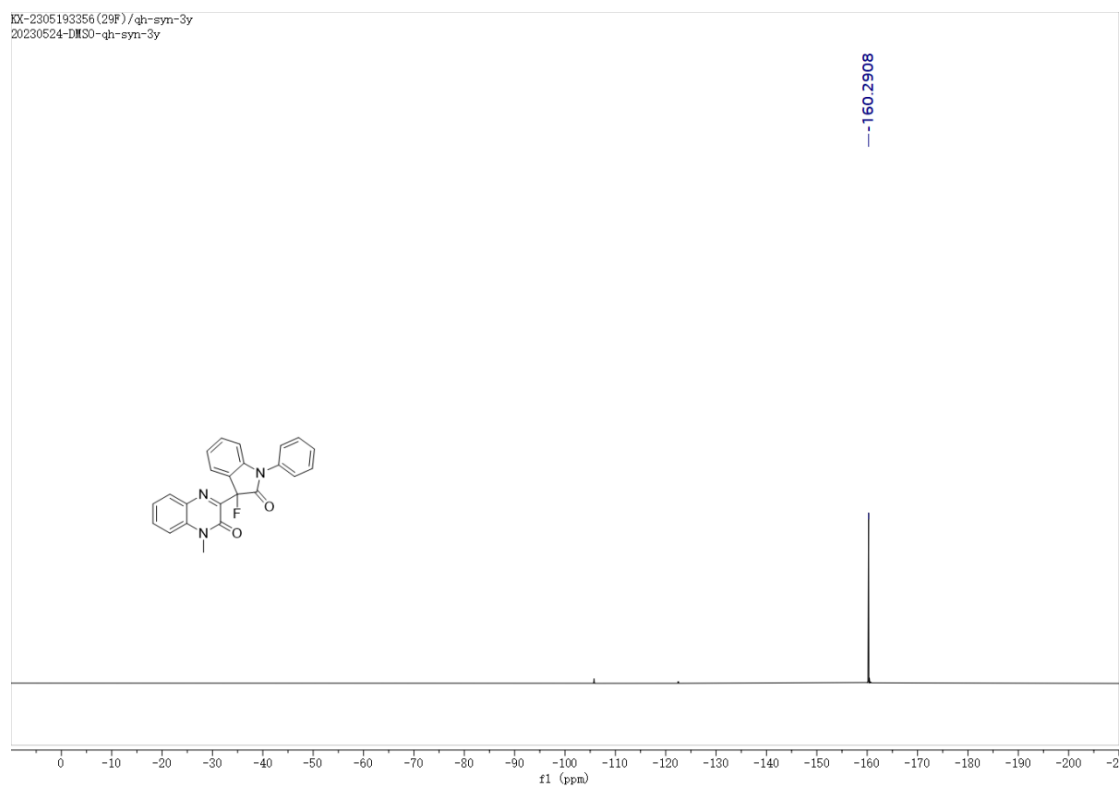

**Figure S99** The  $^{19}\text{F}$  NMR Spectrum of Compound **3y** in  $\text{DMSO-}d_6$

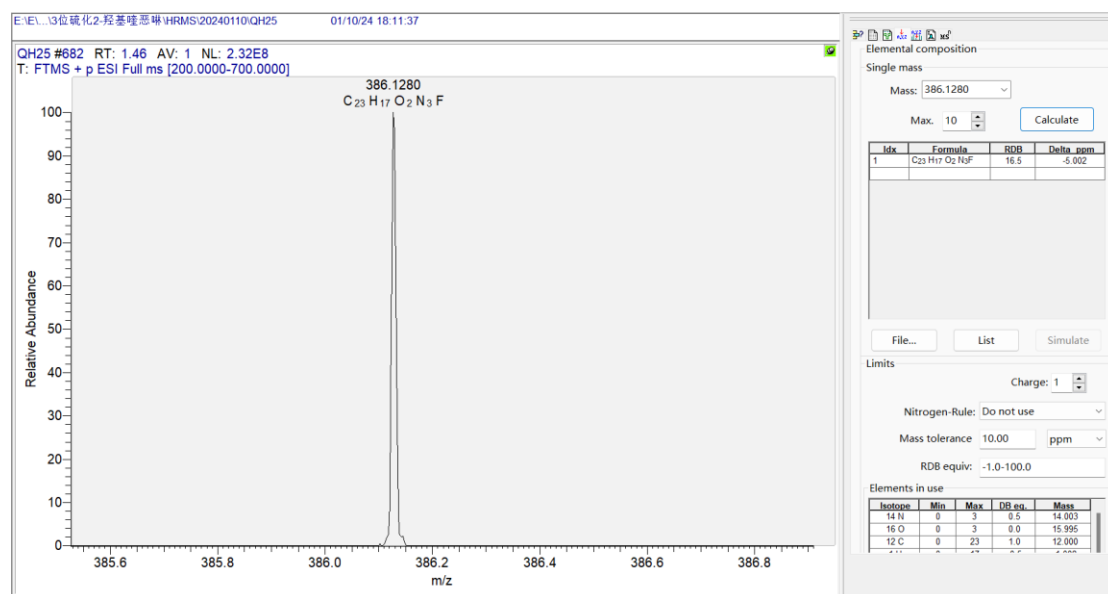

**Figure S100.** The HR-ESI-MS Spectrum of Compound **3y**

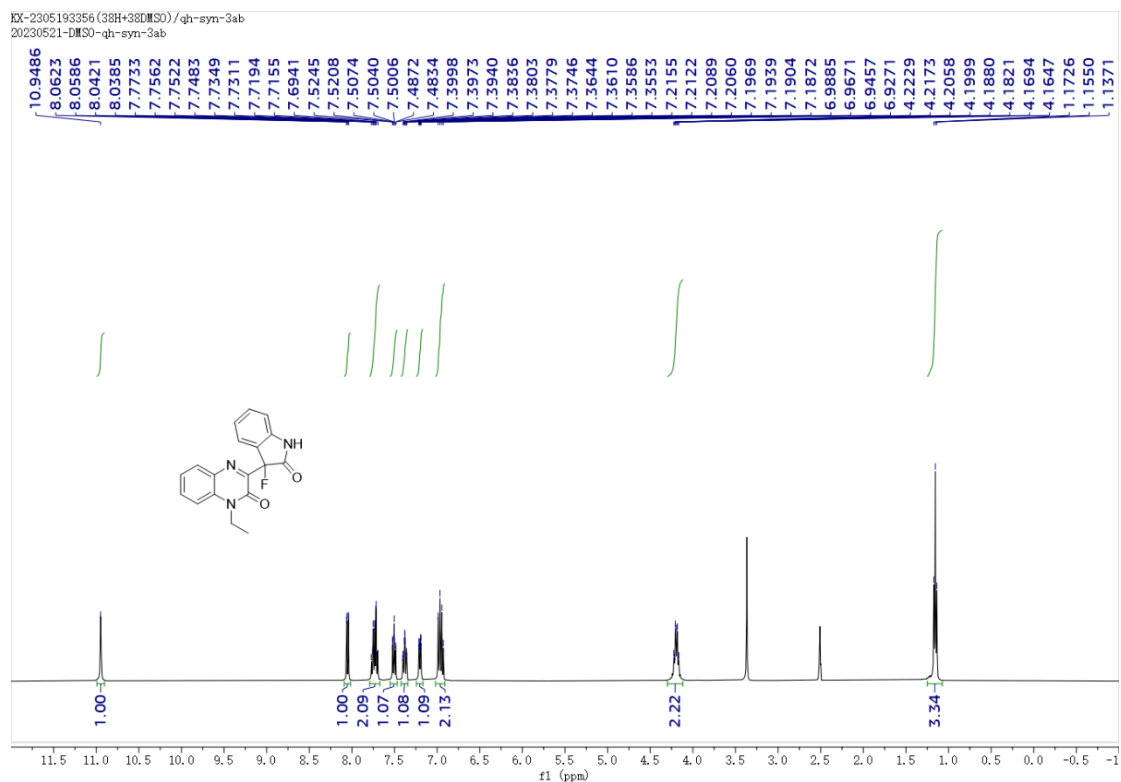

Figure S101 The  $^1\text{H}$  NMR Spectrum of Compound **3ab** in  $\text{DMSO}-d_6$

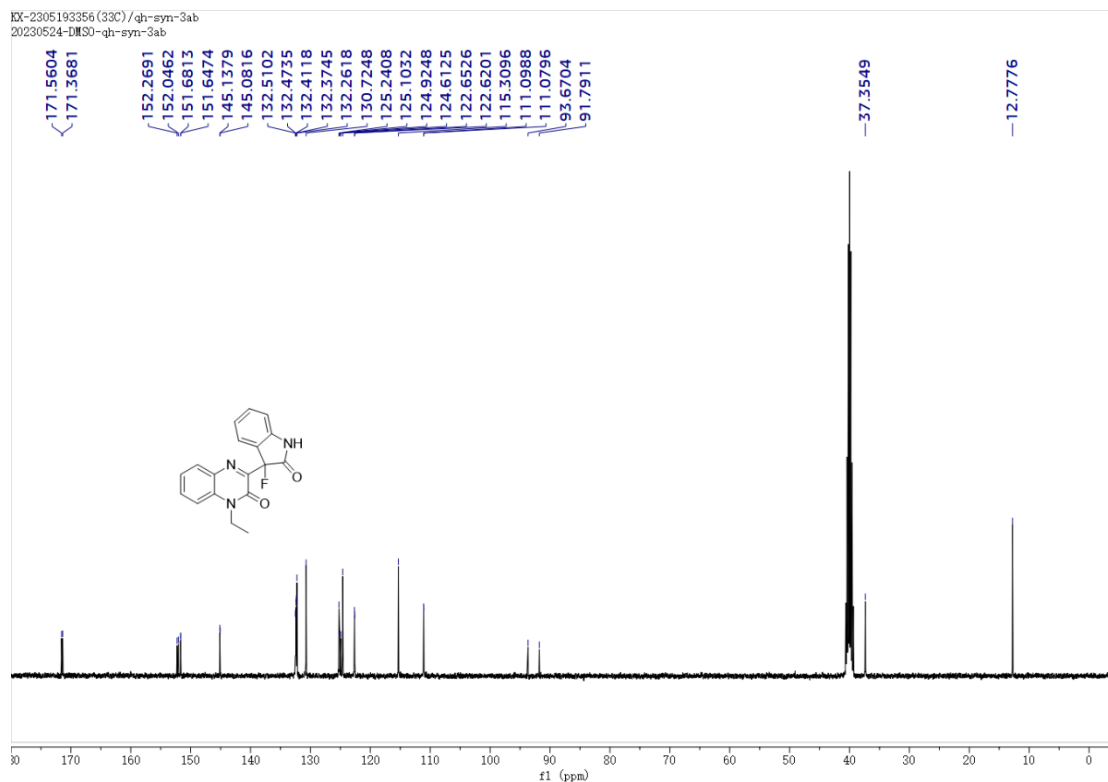

Figure S102 The  $^{13}\text{C}$  NMR Spectrum of Compound **3ab** in  $\text{DMSO}-d_6$

KX-2305193356 (29F) / qh-syn-3ab  
20230524-DMSO-qh-syn-3ab

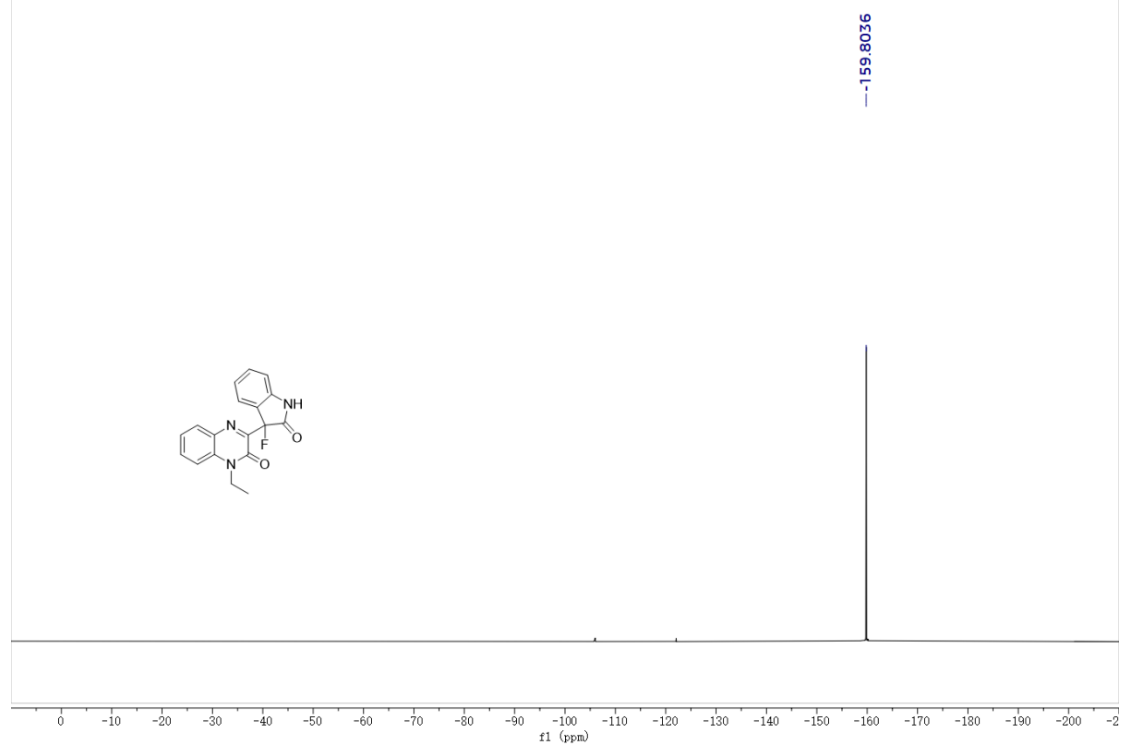

**Figure S103** The  $^{19}\text{F}$  NMR Spectrum of Compound **3ab** in  $\text{DMSO-}d_6$

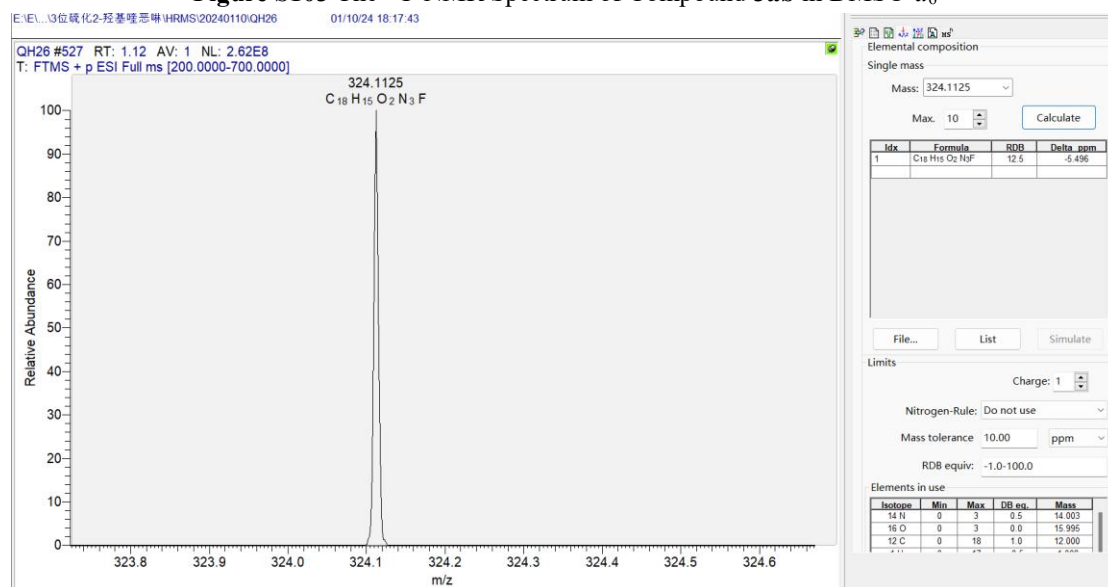

**Figure S104.** The HR-ESI-MS Spectrum of Compound **3ab**



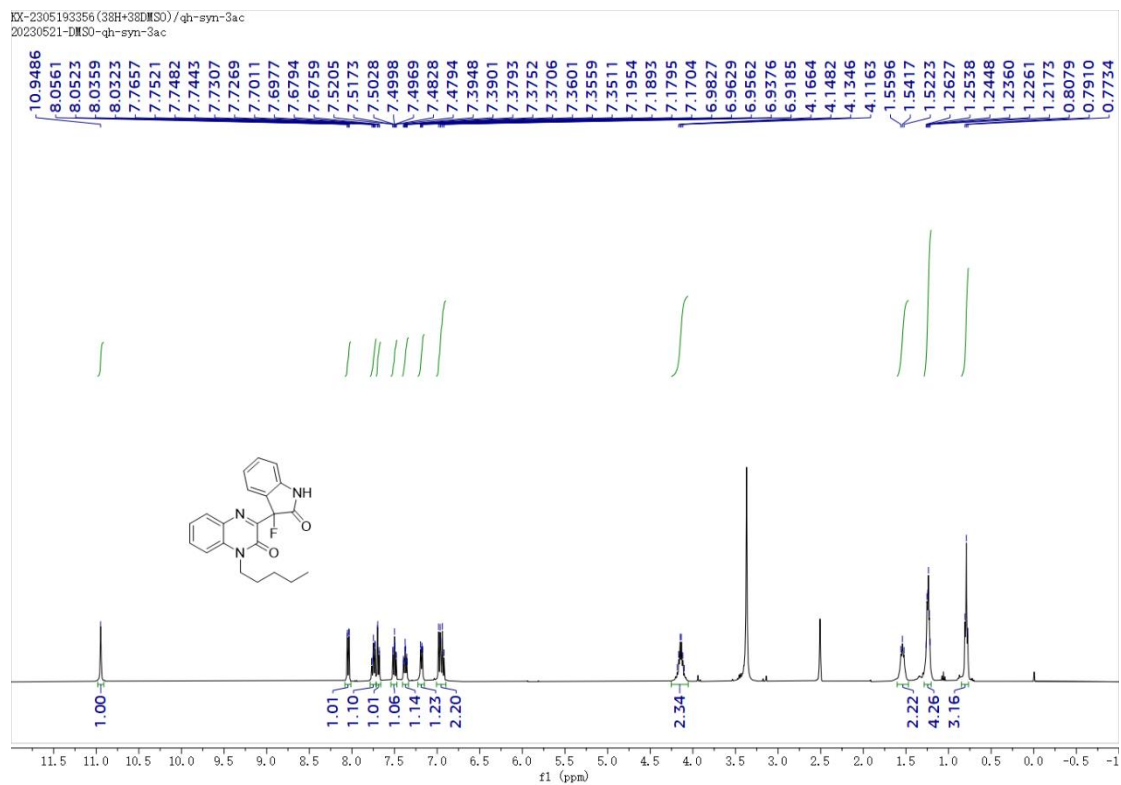

**Figure S105** The  $^1\text{H}$  NMR Spectrum of Compound **3ac** in  $\text{DMSO-}d_6$

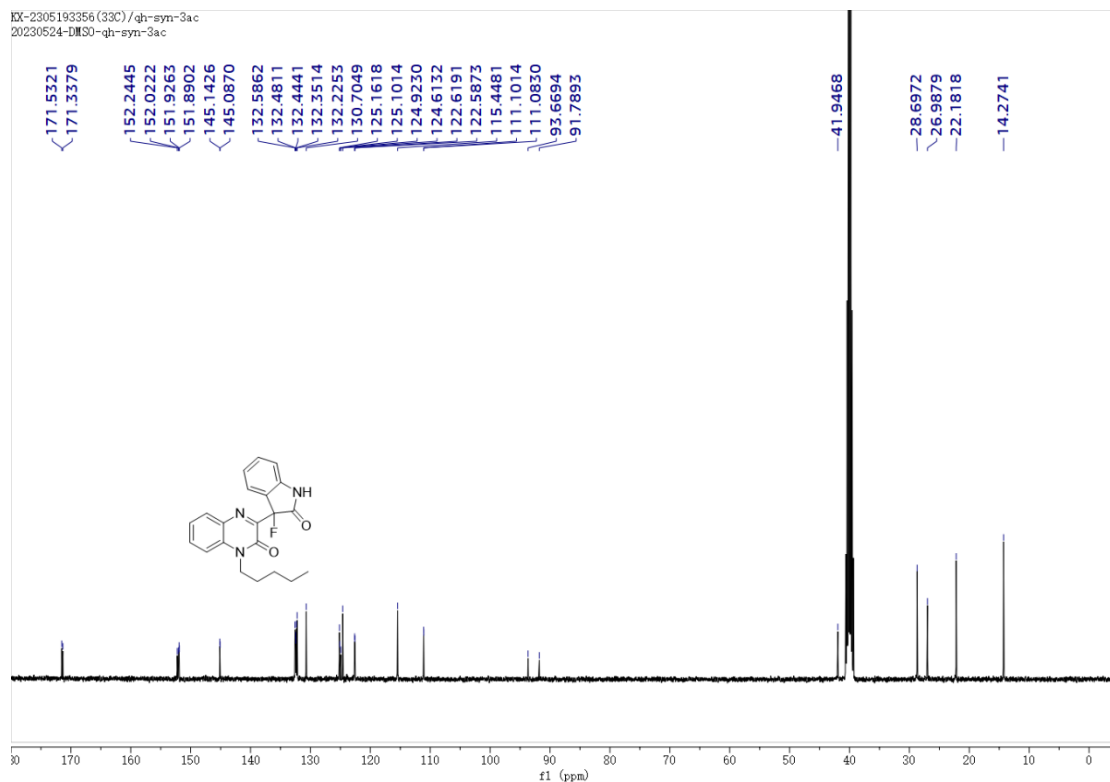

**Figure S106** The  $^{13}\text{C}$  NMR Spectrum of Compound **3ac** in  $\text{DMSO-}d_6$

KX-2305193356 (20F) / qh-syn-3ac  
20230524-DMSO-qh-syn-3ac

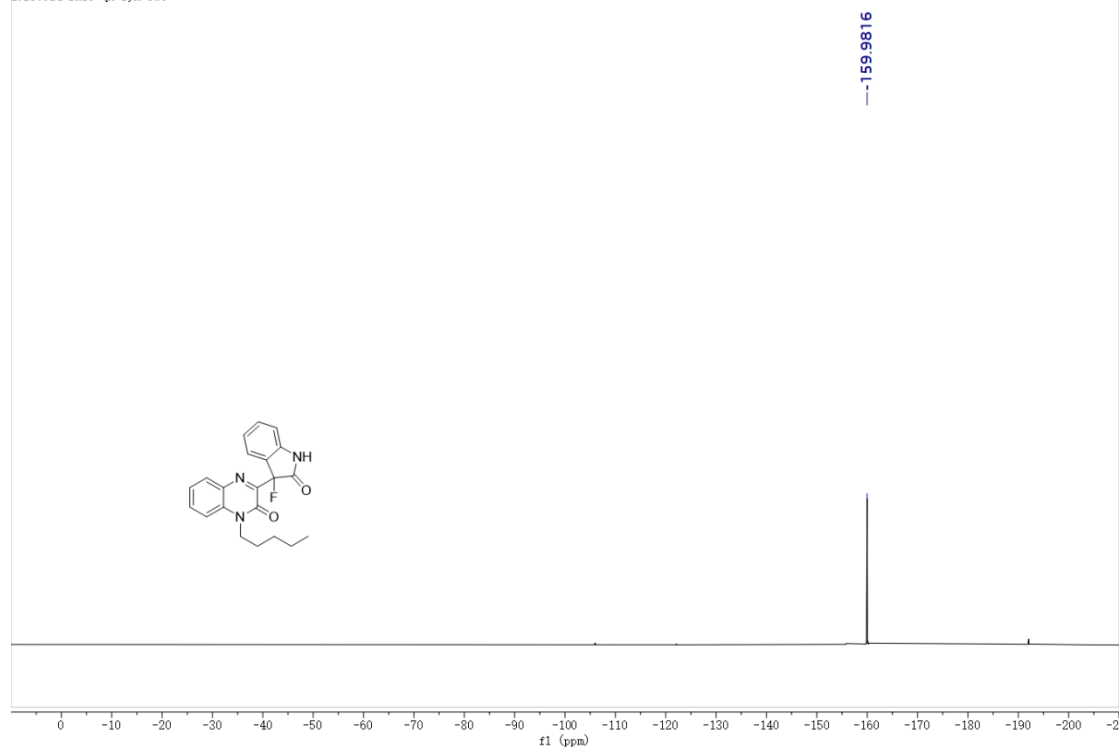

**Figure S107** The  $^{19}\text{F}$  NMR Spectrum of Compound **3ac** in  $\text{DMSO-}d_6$

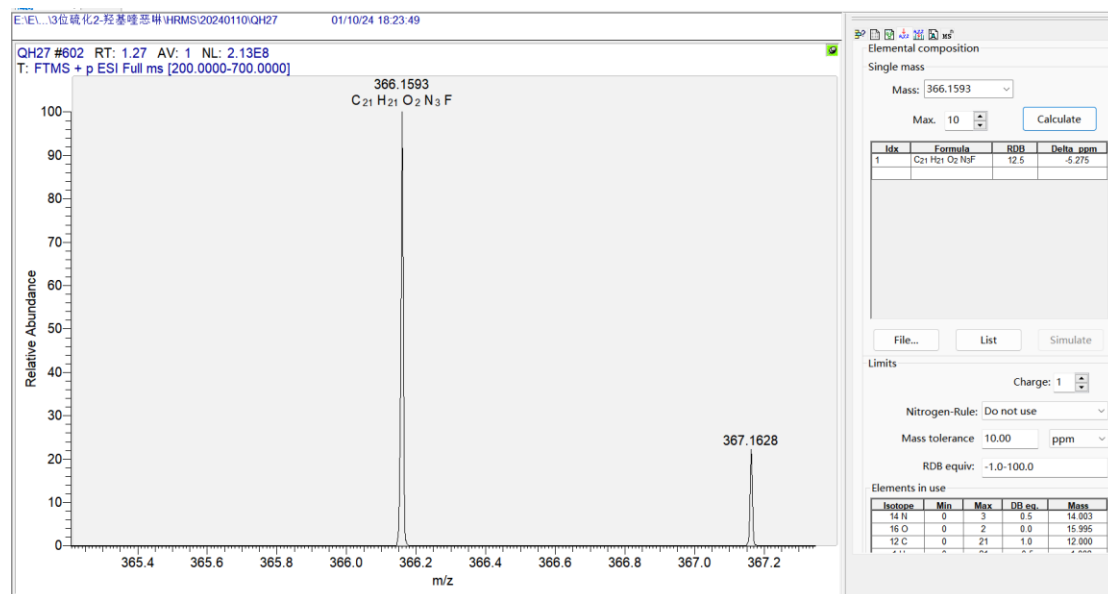

**Figure S108.** The HR-ESI-MS Spectrum of Compound **3ac**

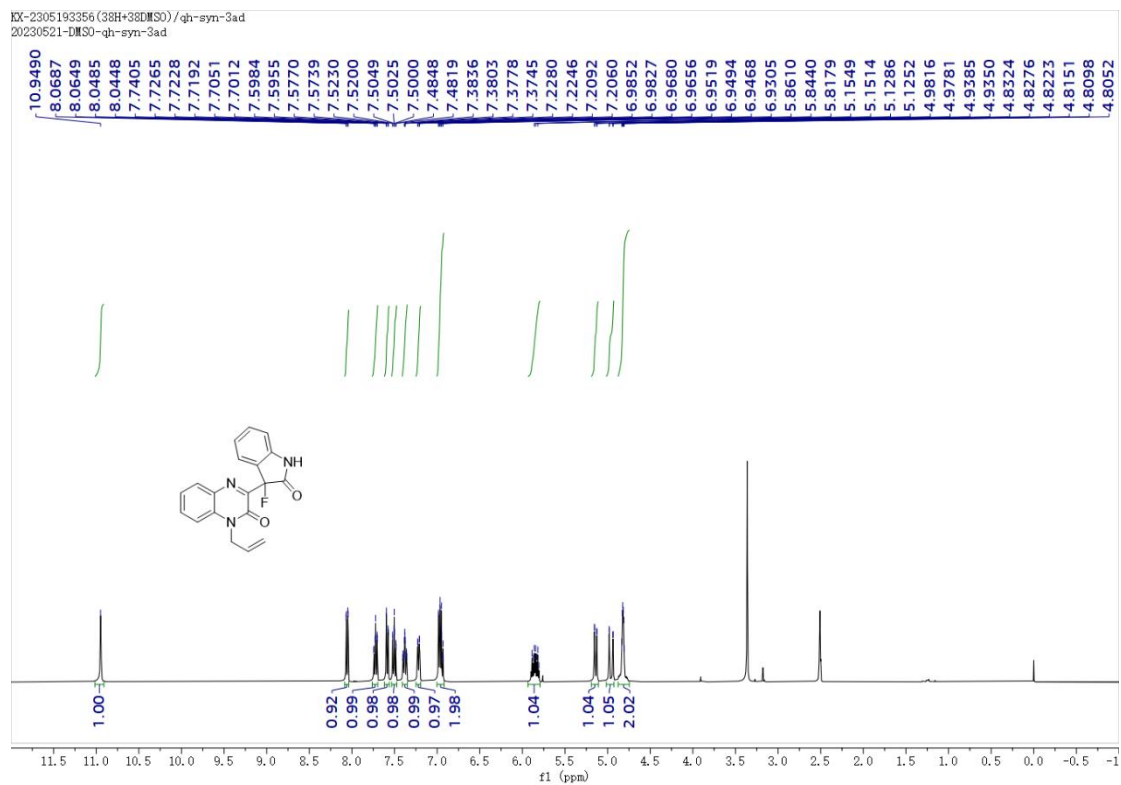

**Figure S109** The  $^1\text{H}$  NMR Spectrum of Compound **3ad** in  $\text{DMSO}-d_6$

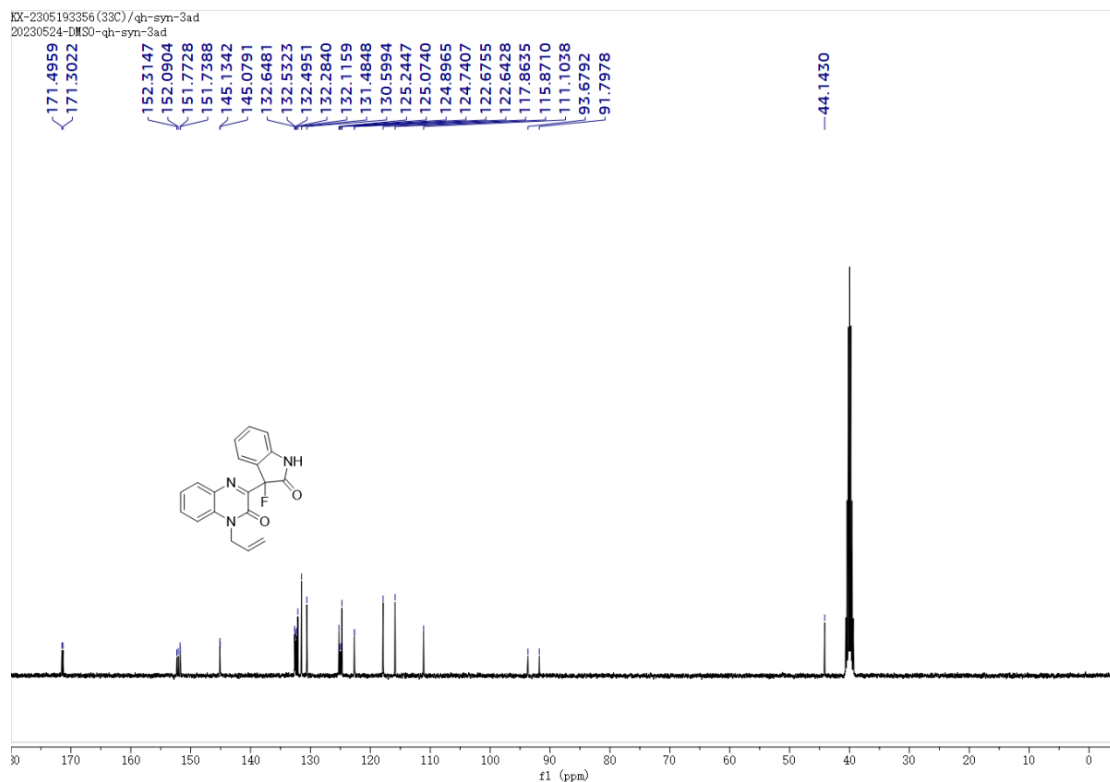

**Figure S110** The  $^{13}\text{C}$  NMR Spectrum of Compound **3ad** in  $\text{DMSO}-d_6$

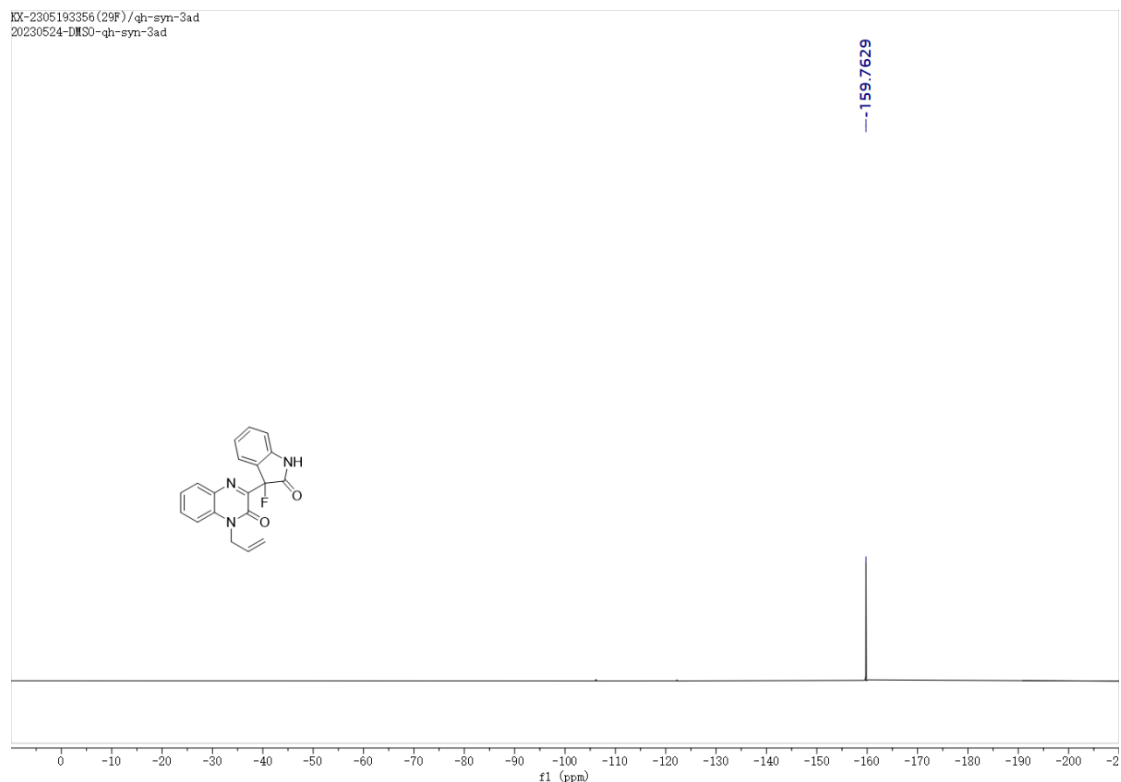

**Figure S111** The  $^{19}\text{F}$  NMR Spectrum of Compound **3ad** in  $\text{DMSO}-d_6$

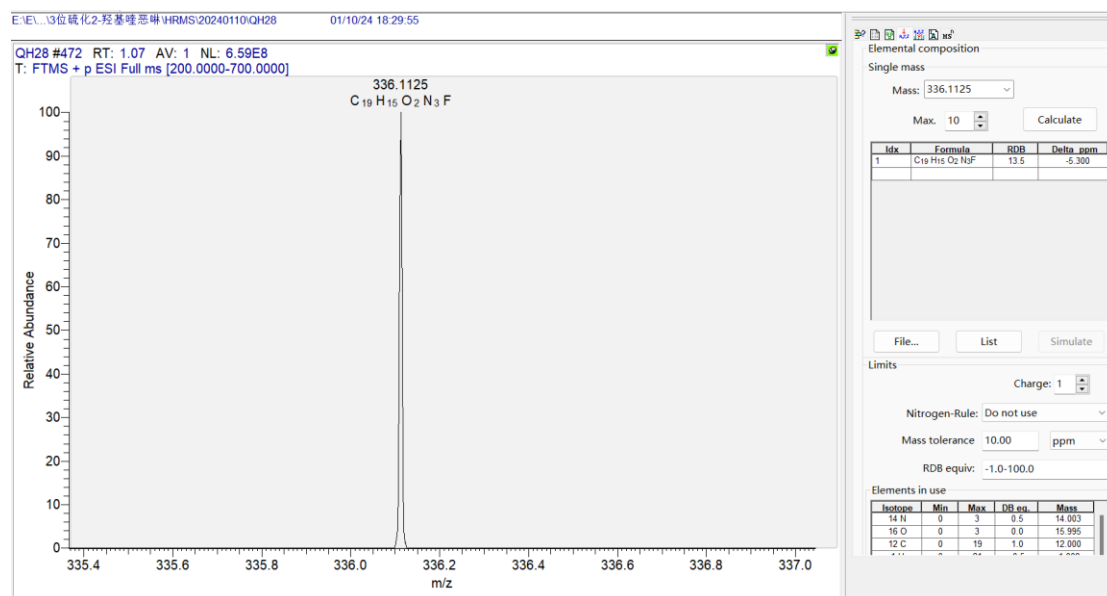

**Figure S112.** The HR-ESI-MS Spectrum of Compound **3ad**

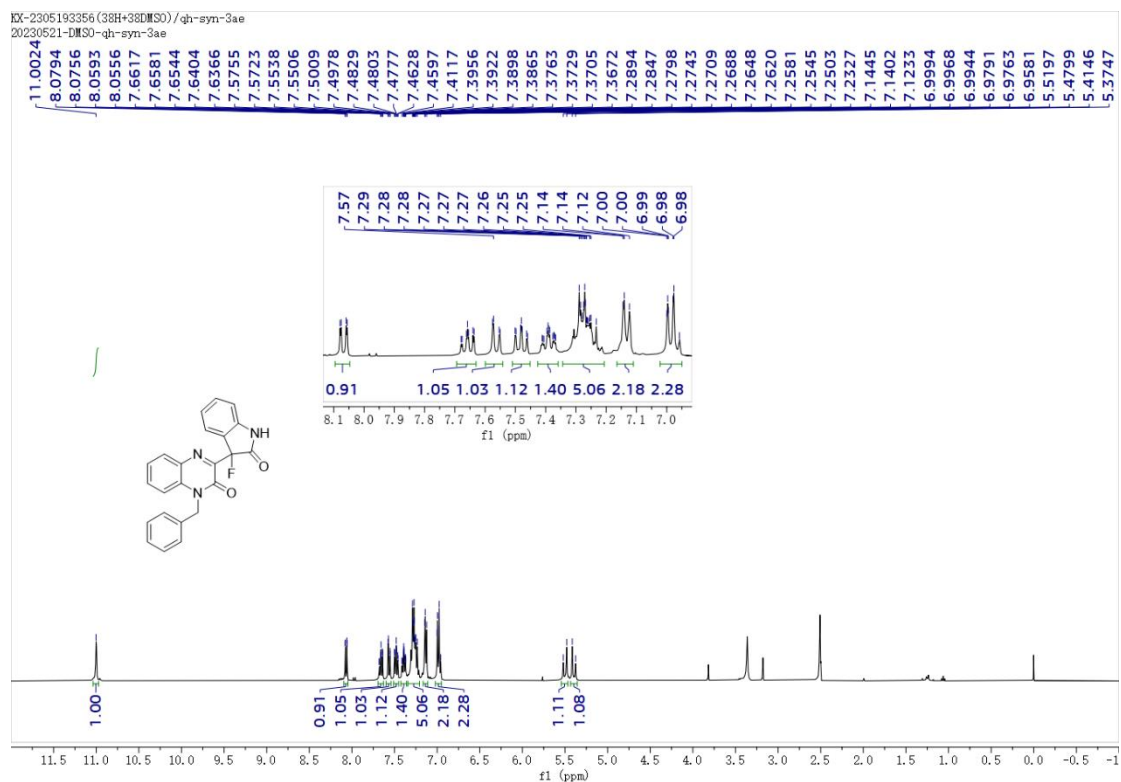

Figure S113 The <sup>1</sup>H NMR Spectrum of Compound 3ae in DMSO-*d*<sub>6</sub>

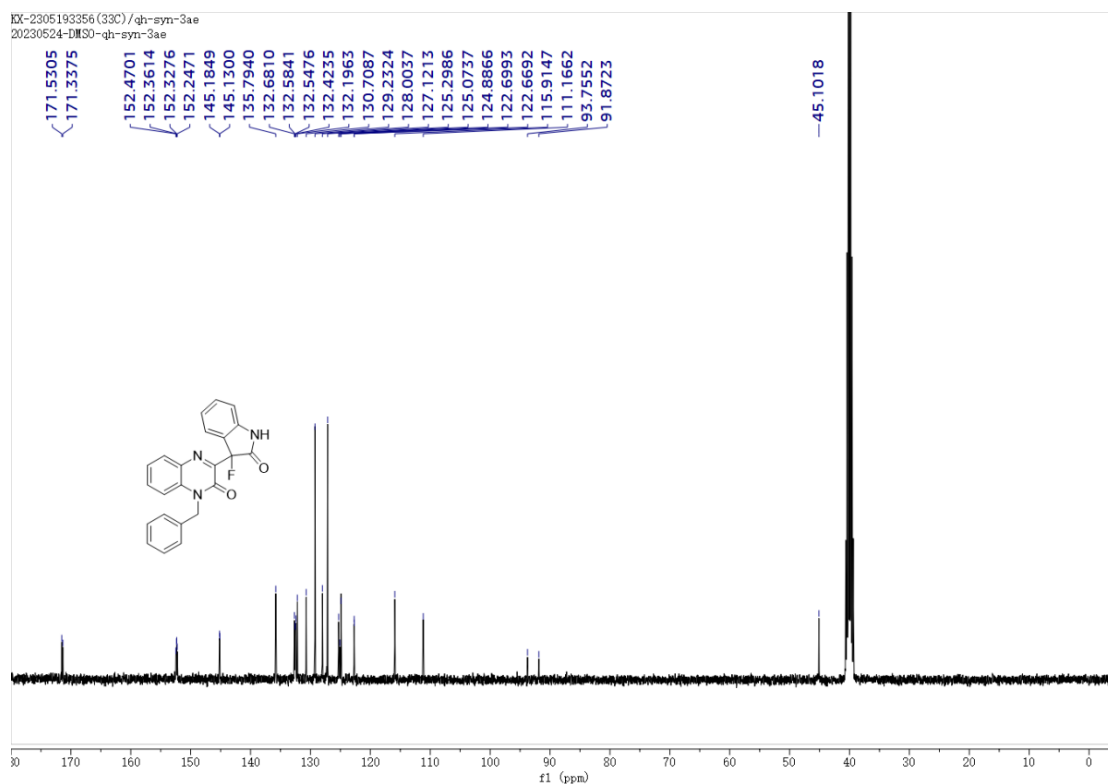

Figure S114 The <sup>13</sup>C NMR Spectrum of Compound 3ae in DMSO-*d*<sub>6</sub>

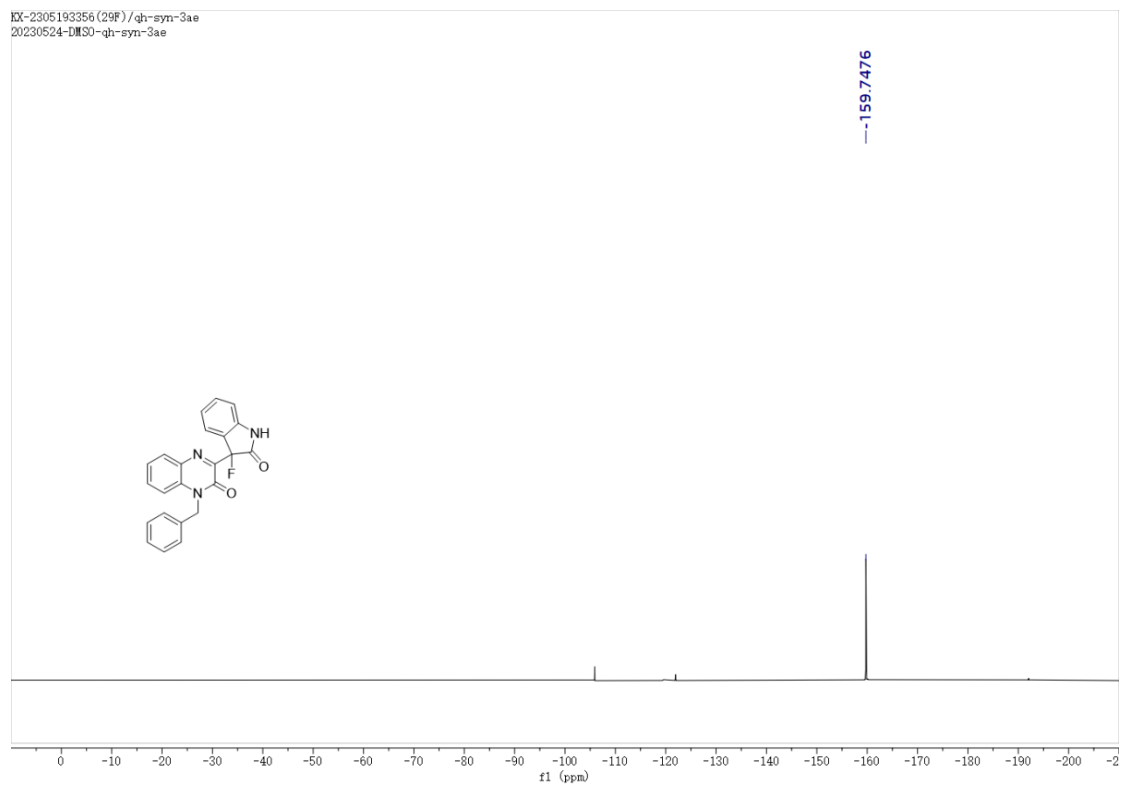

**Figure S115** The  $^{19}\text{F}$  NMR Spectrum of Compound **3ae** in  $\text{DMSO-}d_6$

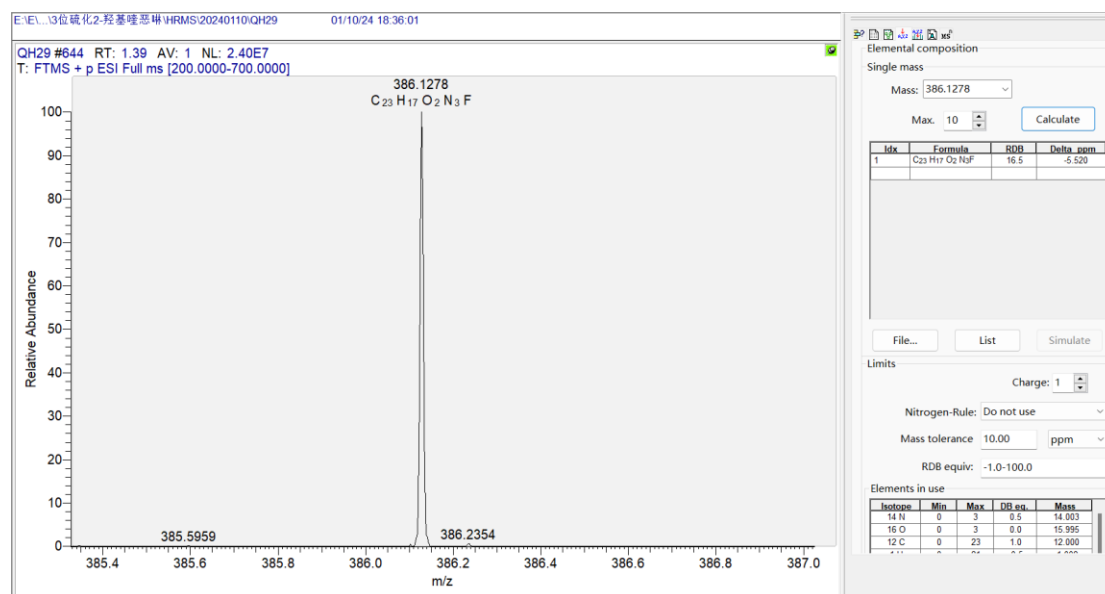

**Figure S116.** The HR-ESI-MS Spectrum of Compound **3ae**

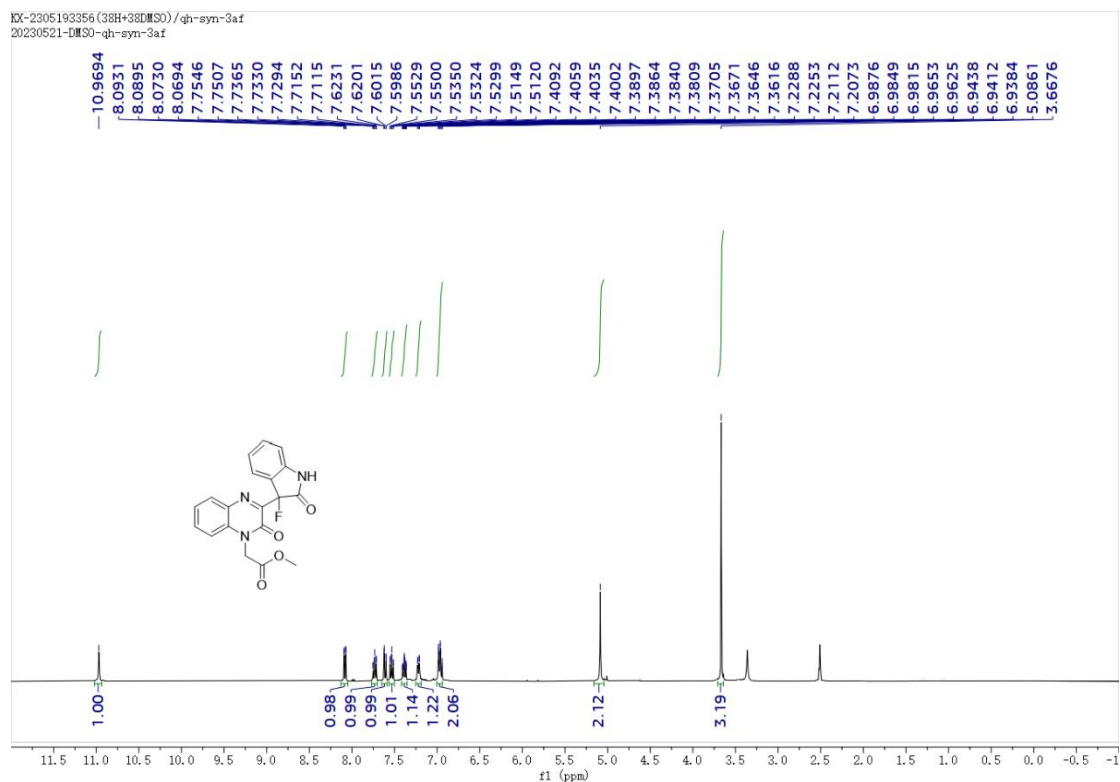

Figure S117 The  $^1\text{H}$  NMR Spectrum of Compound 3af in  $\text{DMSO}-d_6$

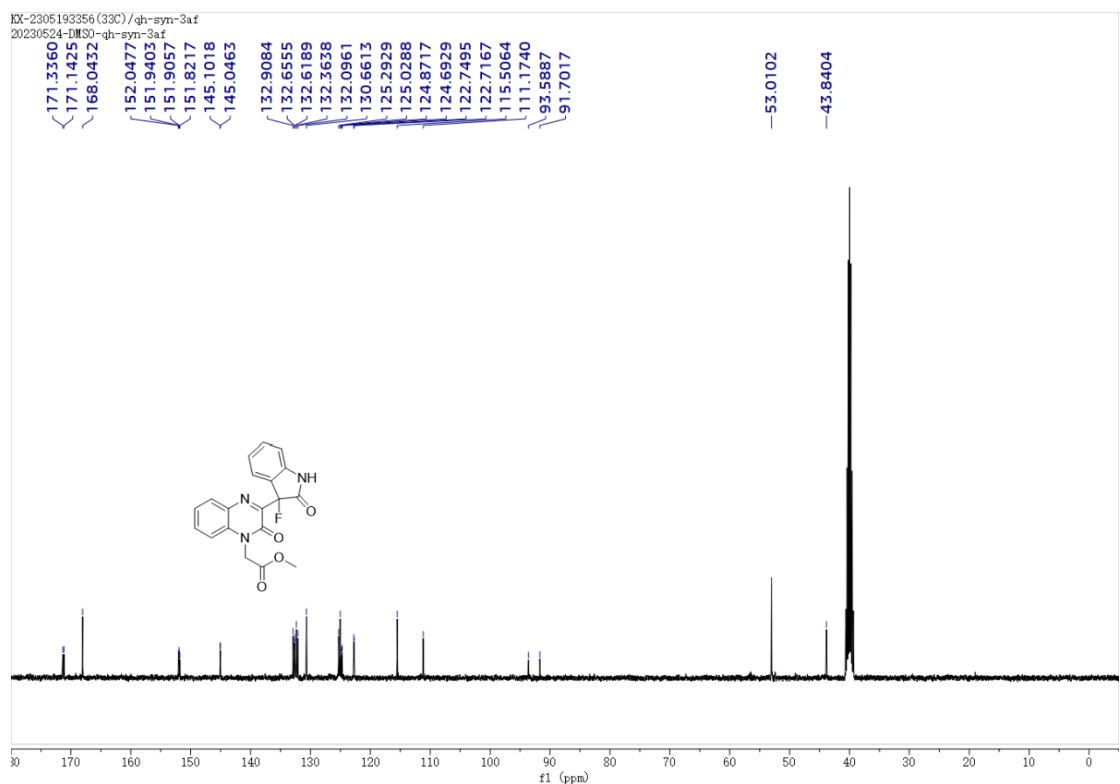

Figure S118 The  $^{13}\text{C}$  NMR Spectrum of Compound 3af in  $\text{DMSO}-d_6$

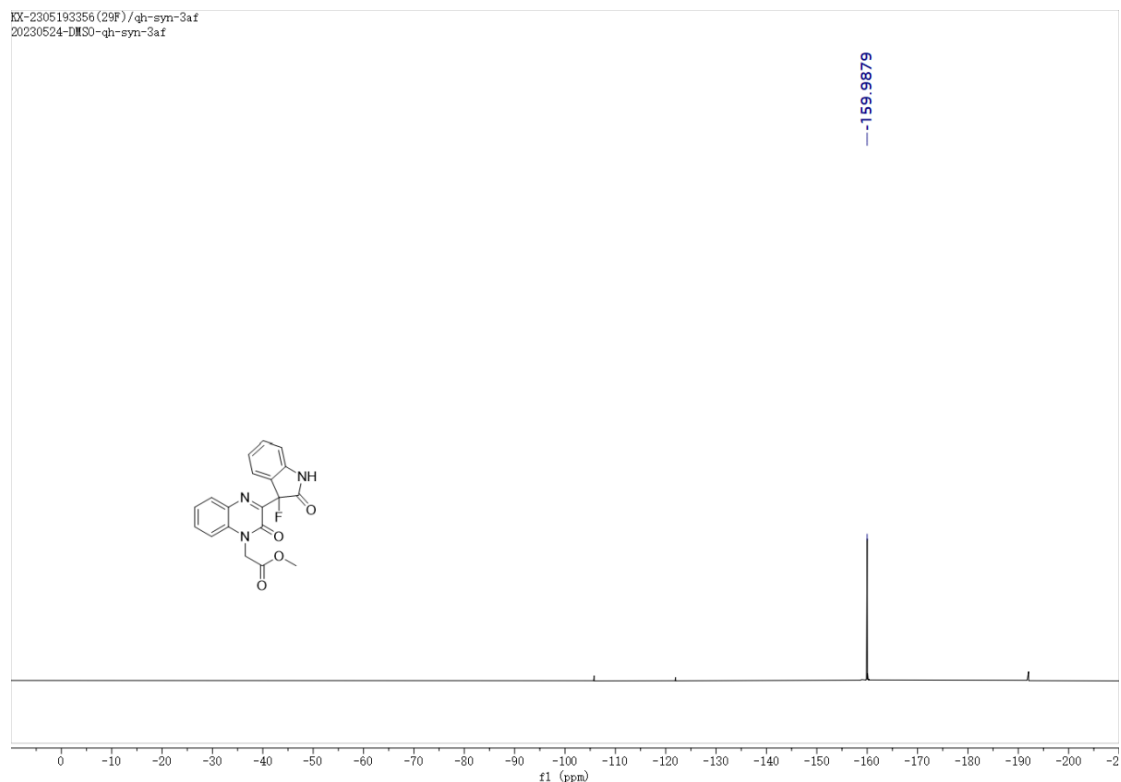

**Figure S119** The  $^{19}\text{F}$  NMR Spectrum of Compound **3af** in  $\text{DMSO-}d_6$

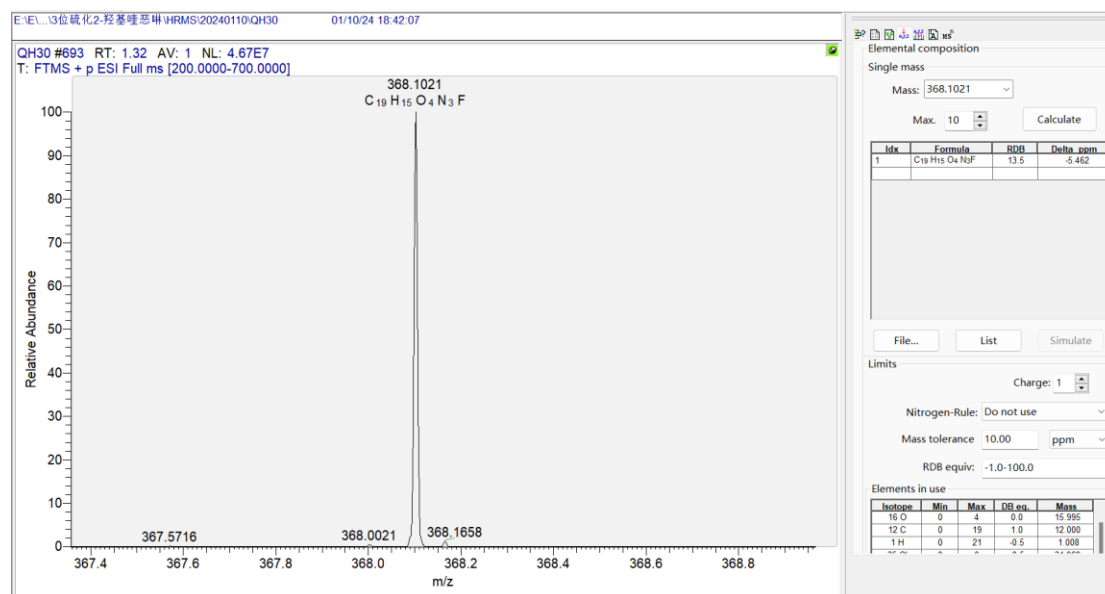

**Figure S120.** The HR-ESI-MS Spectrum of Compound **3af**



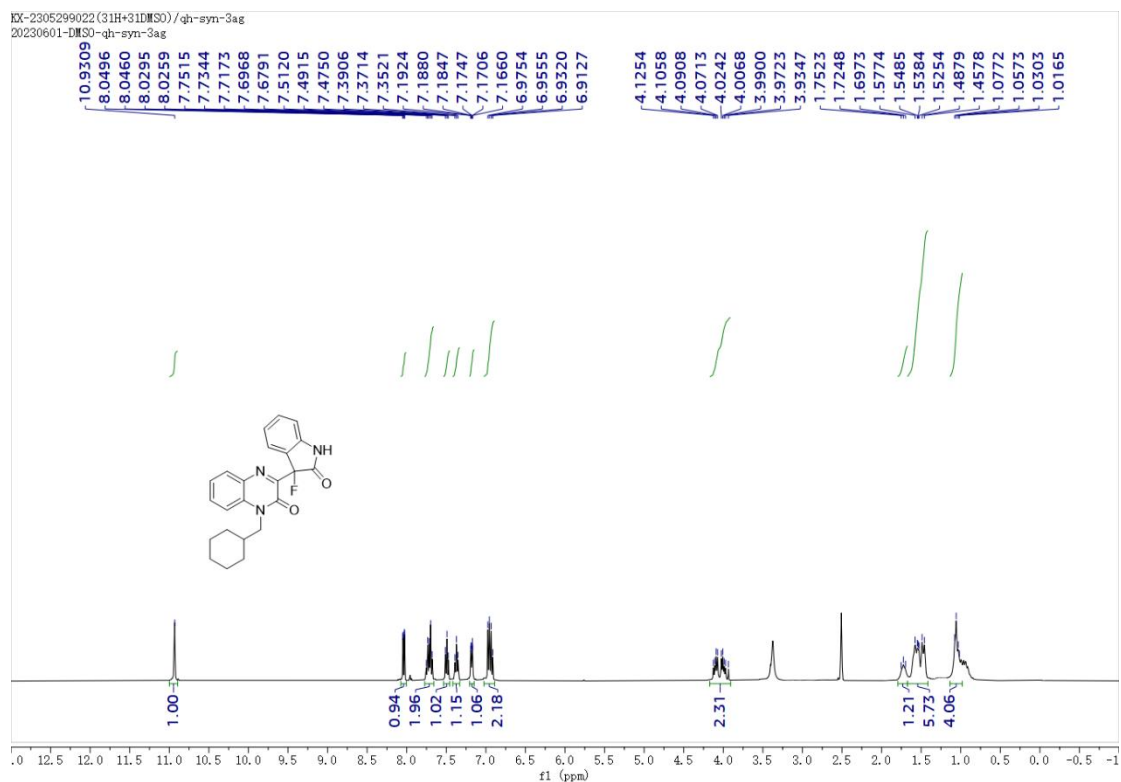

**Figure S121** The  $^1\text{H}$  NMR Spectrum of Compound **3ag** in  $\text{DMSO}-d_6$

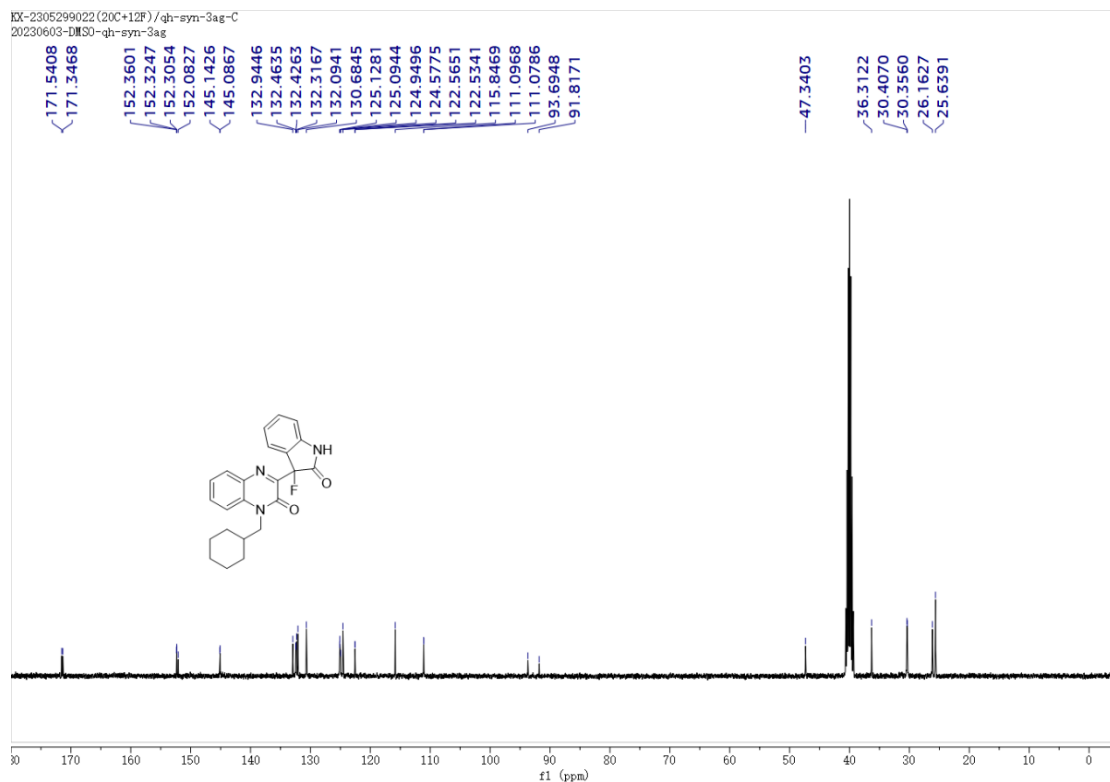

**Figure S122** The  $^{13}\text{C}$  NMR Spectrum of Compound **3ag** in  $\text{DMSO}-d_6$

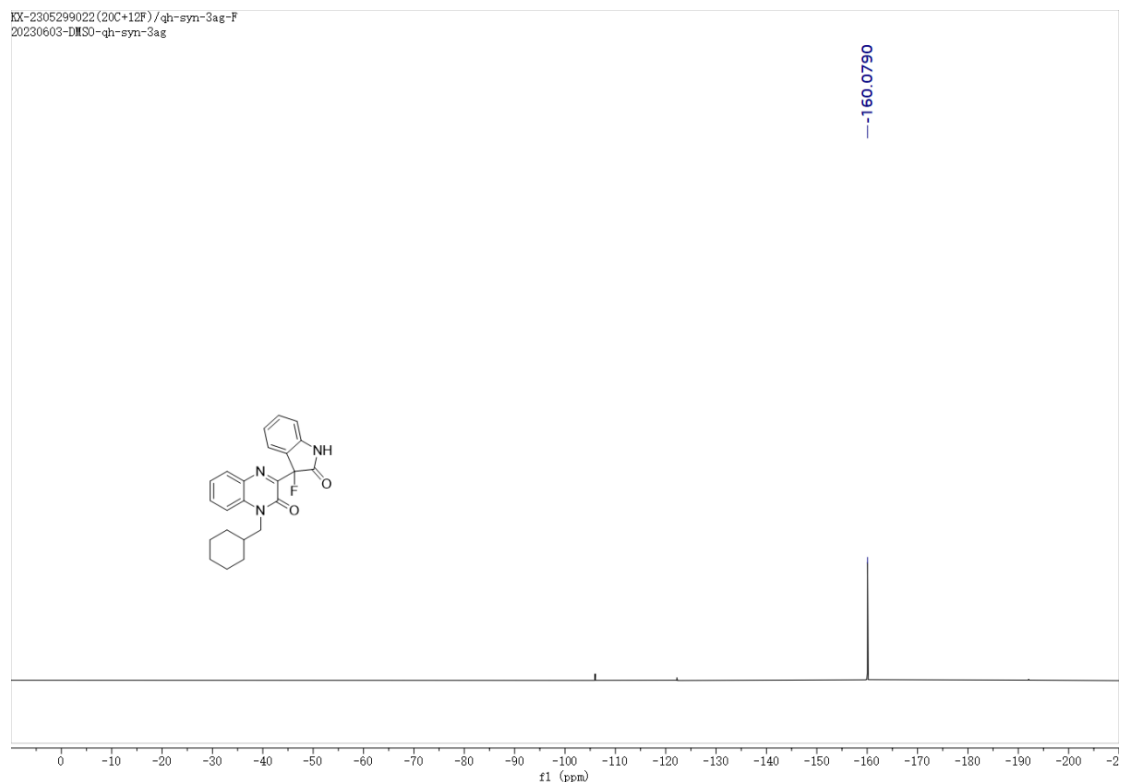

**Figure S123** The  $^{19}\text{F}$  NMR Spectrum of Compound **3ag** in  $\text{DMSO-}d_6$

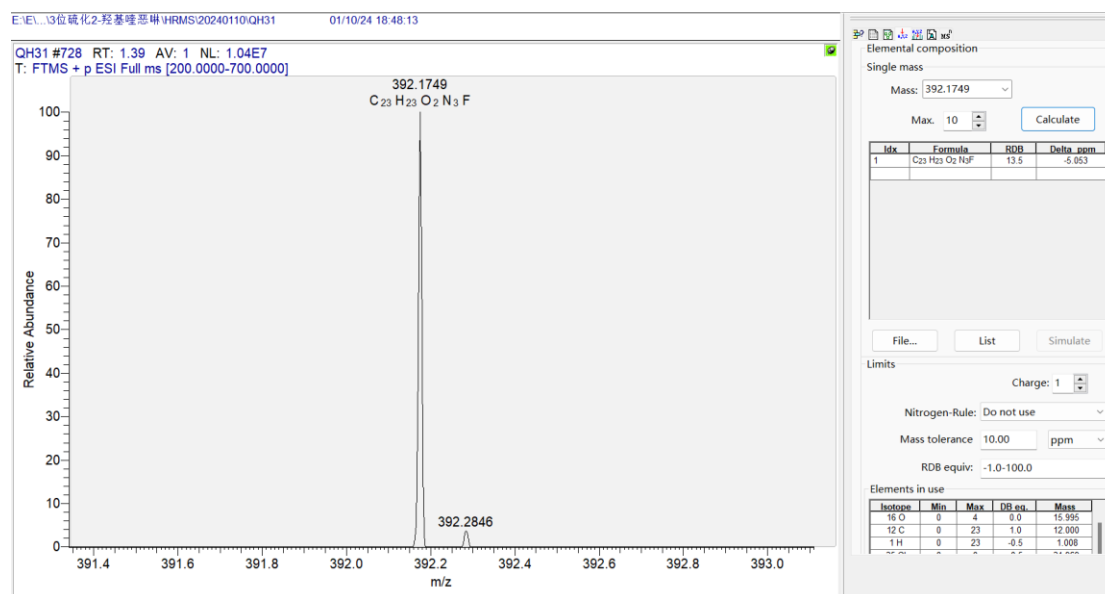

**Figure S124.** The HR-ESI-MS Spectrum of Compound **3ag**

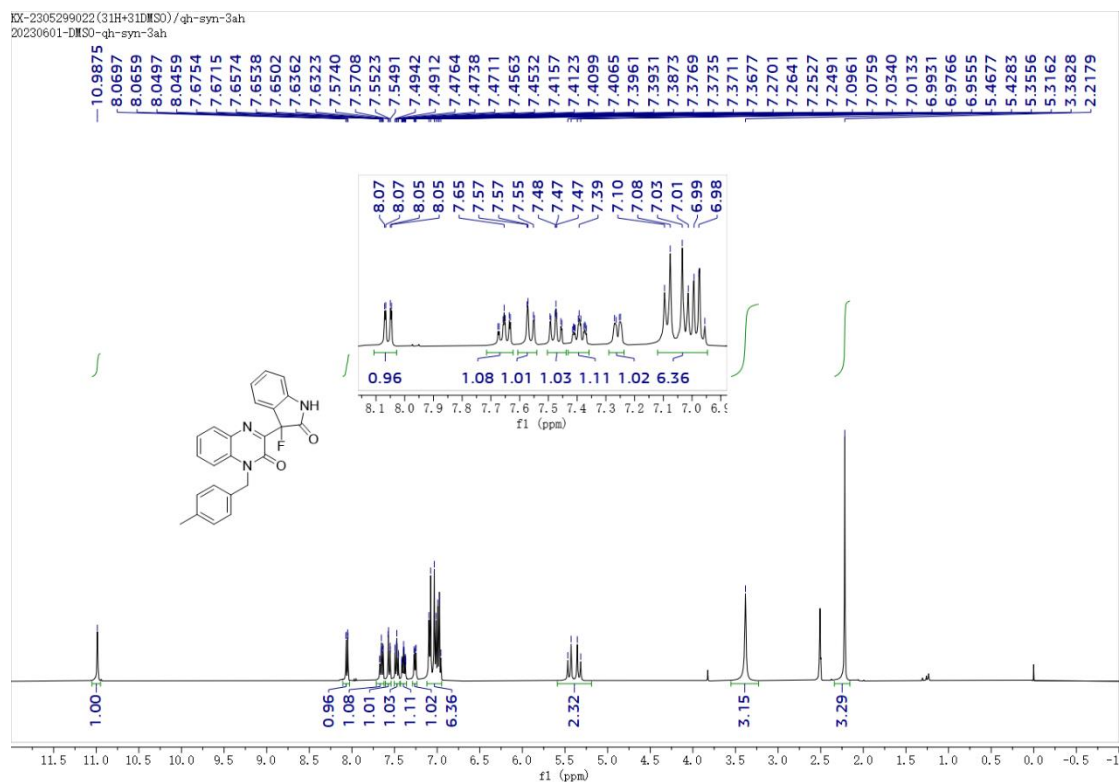

Figure S125 The <sup>1</sup>H NMR Spectrum of Compound 3ah in DMSO-*d*<sub>6</sub>

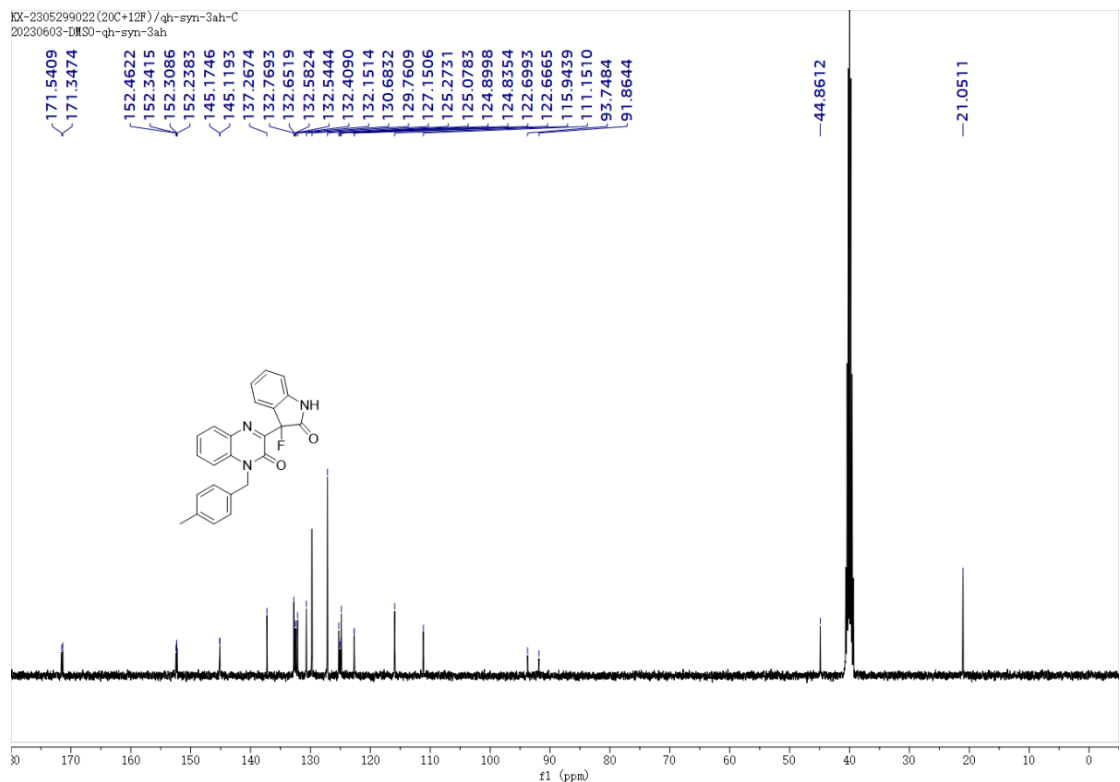

Figure S126 The <sup>13</sup>C NMR Spectrum of Compound 3ah in DMSO-*d*<sub>6</sub>

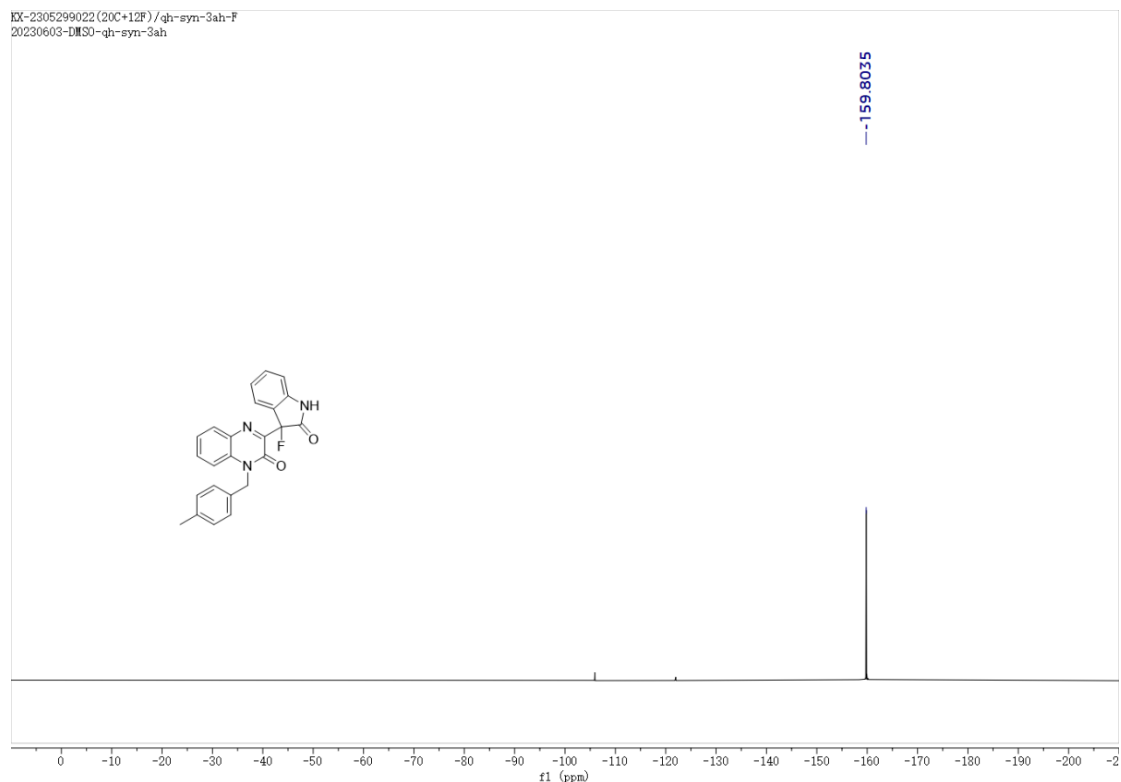

**Figure S127** The  $^{19}\text{F}$  NMR Spectrum of Compound **3ah** in  $\text{DMSO-}d_6$

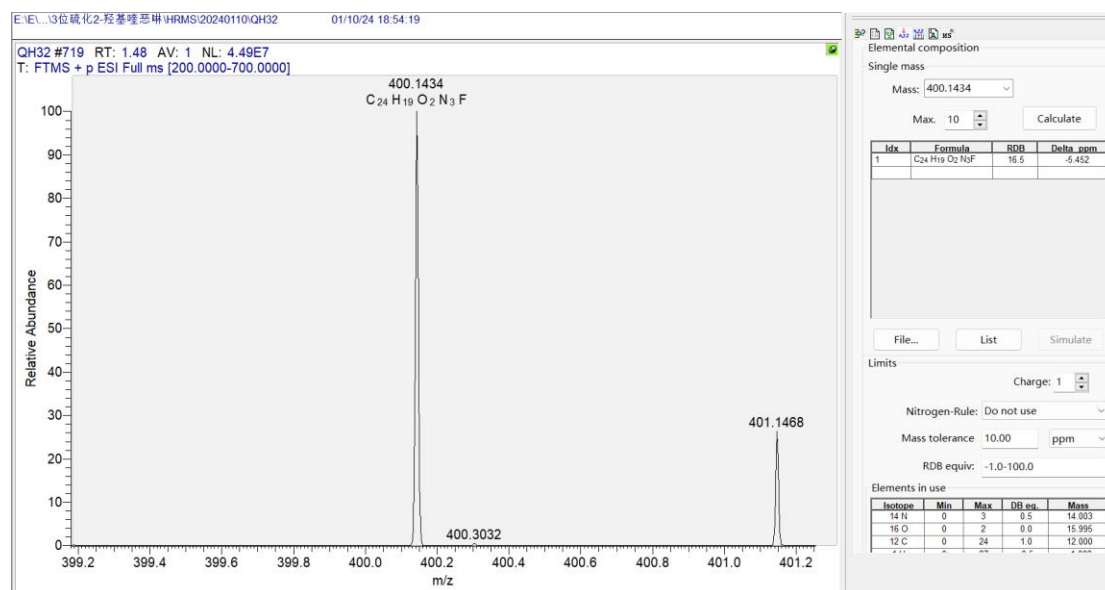

**Figure S128.** The HR-ESI-MS Spectrum of Compound **3ah**

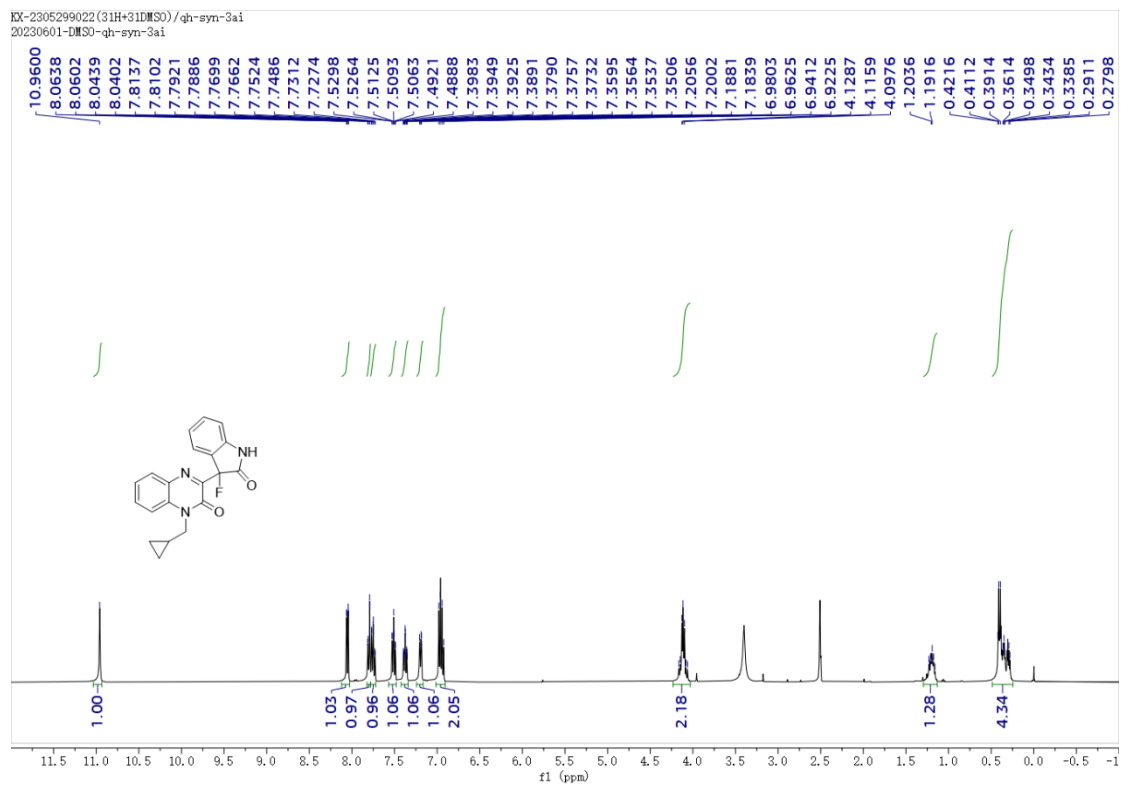

Figure S129 The  $^1\text{H}$  NMR Spectrum of Compound 3ai in DMSO- $d_6$

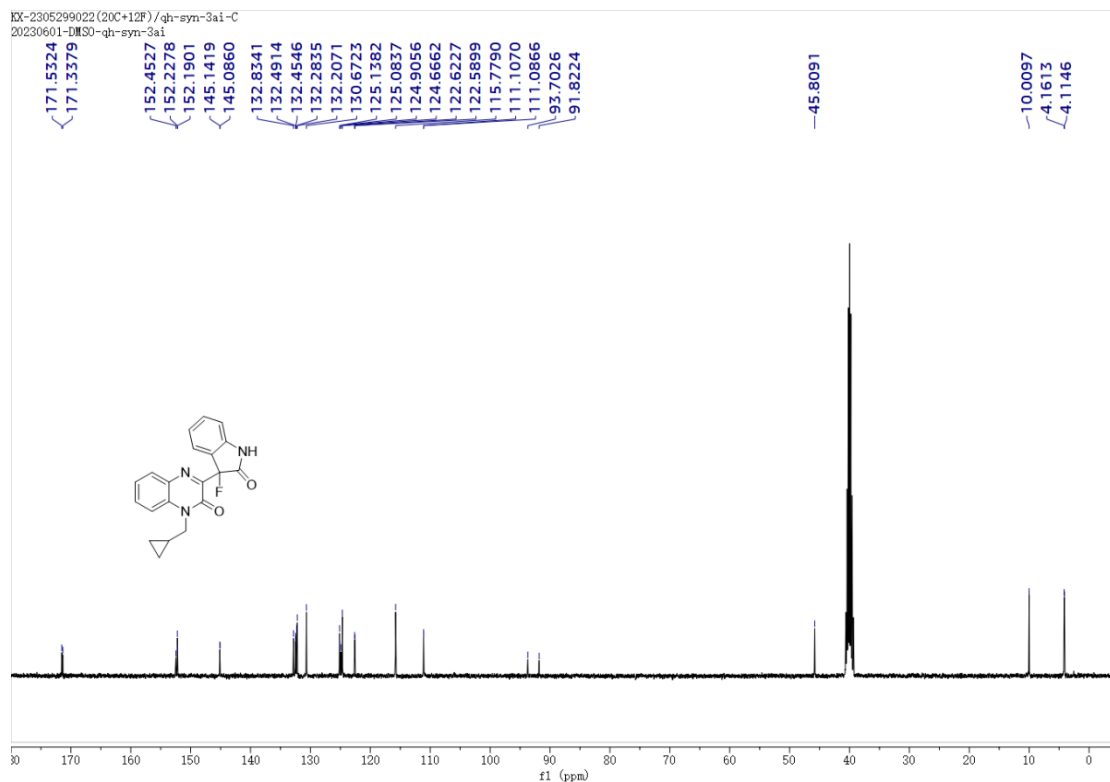

Figure S130 The  $^{13}\text{C}$  NMR Spectrum of Compound 3ai in DMSO- $d_6$

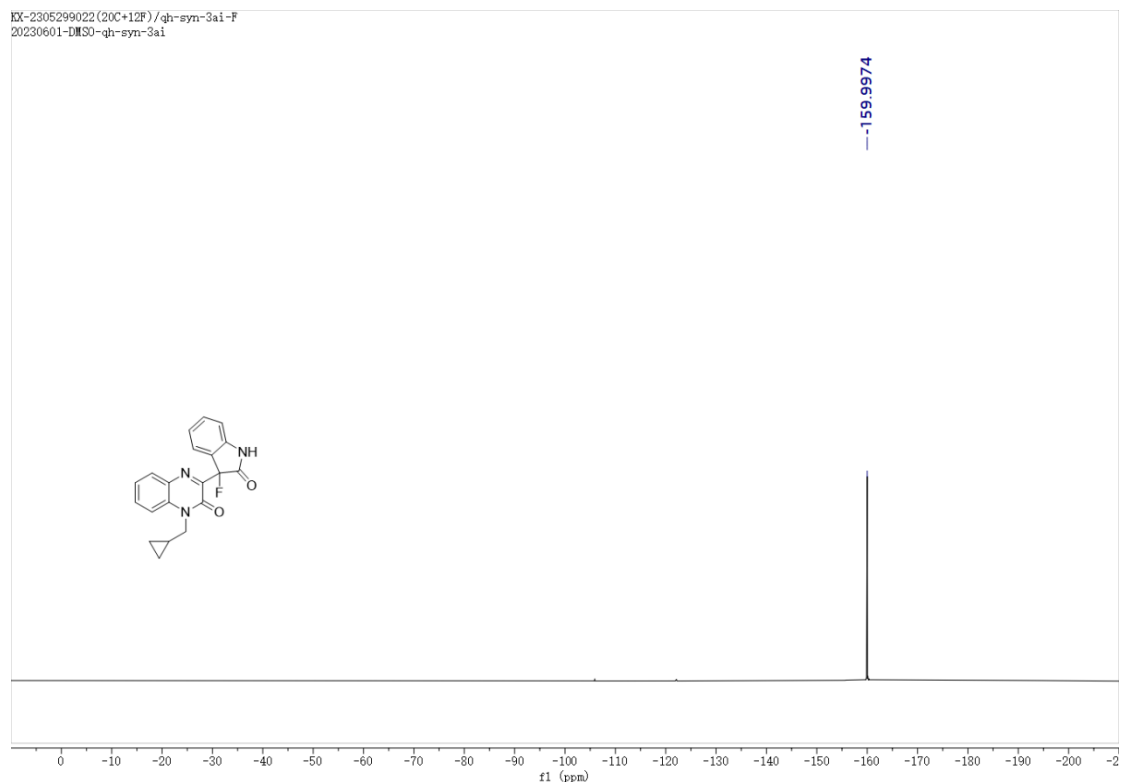

**Figure S131** The  $^{19}\text{F}$  NMR Spectrum of Compound **3ai** in  $\text{DMSO-}d_6$

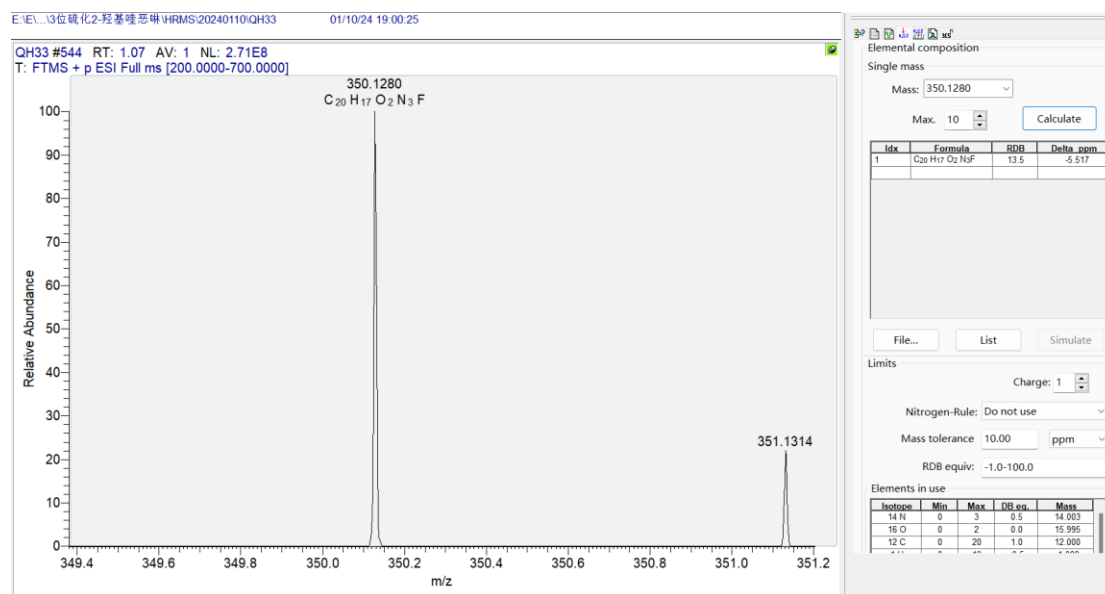

**Figure S132.** The HR-ESI-MS Spectrum of Compound **3ai**

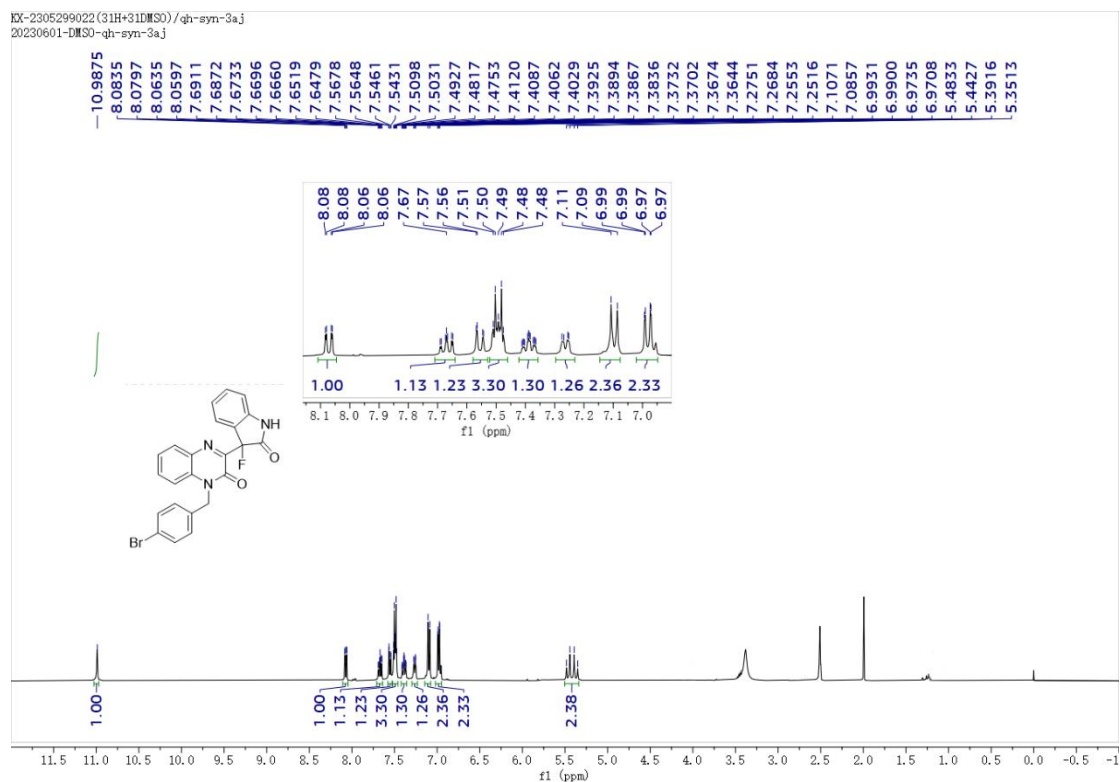

Figure S133 The <sup>1</sup>H NMR Spectrum of Compound 3aj in DMSO-*d*<sub>6</sub>

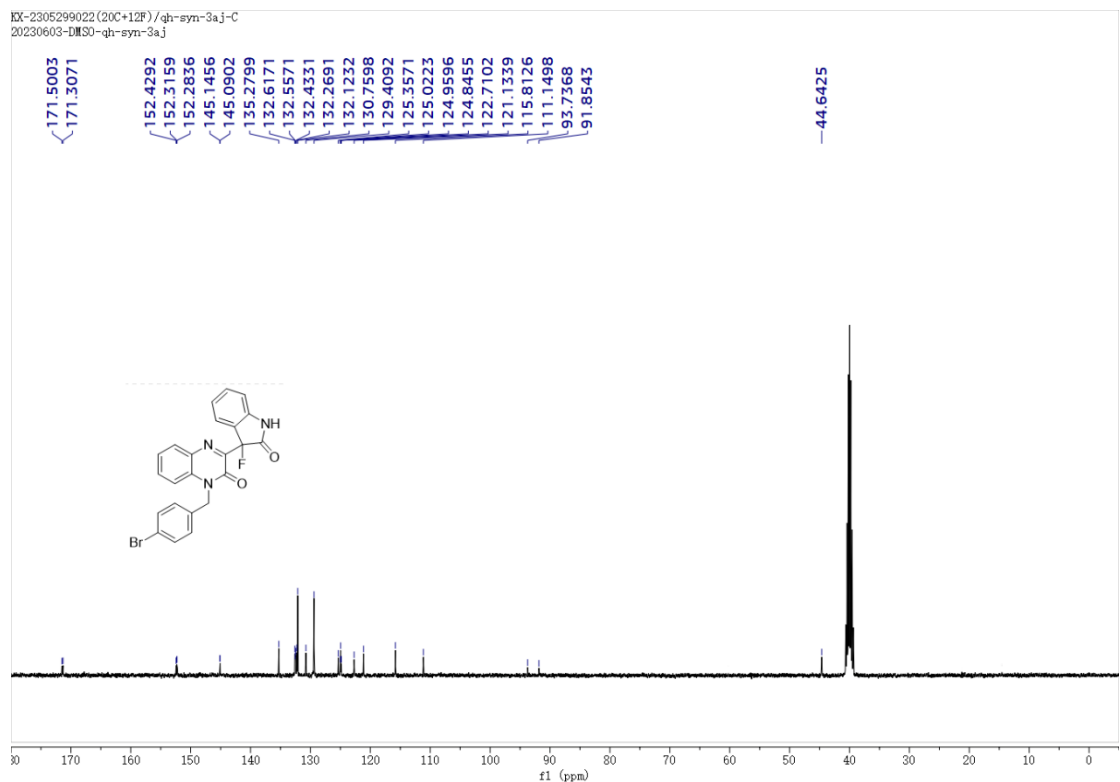

Figure S134 The <sup>13</sup>C NMR Spectrum of Compound 3aj in DMSO-*d*<sub>6</sub>

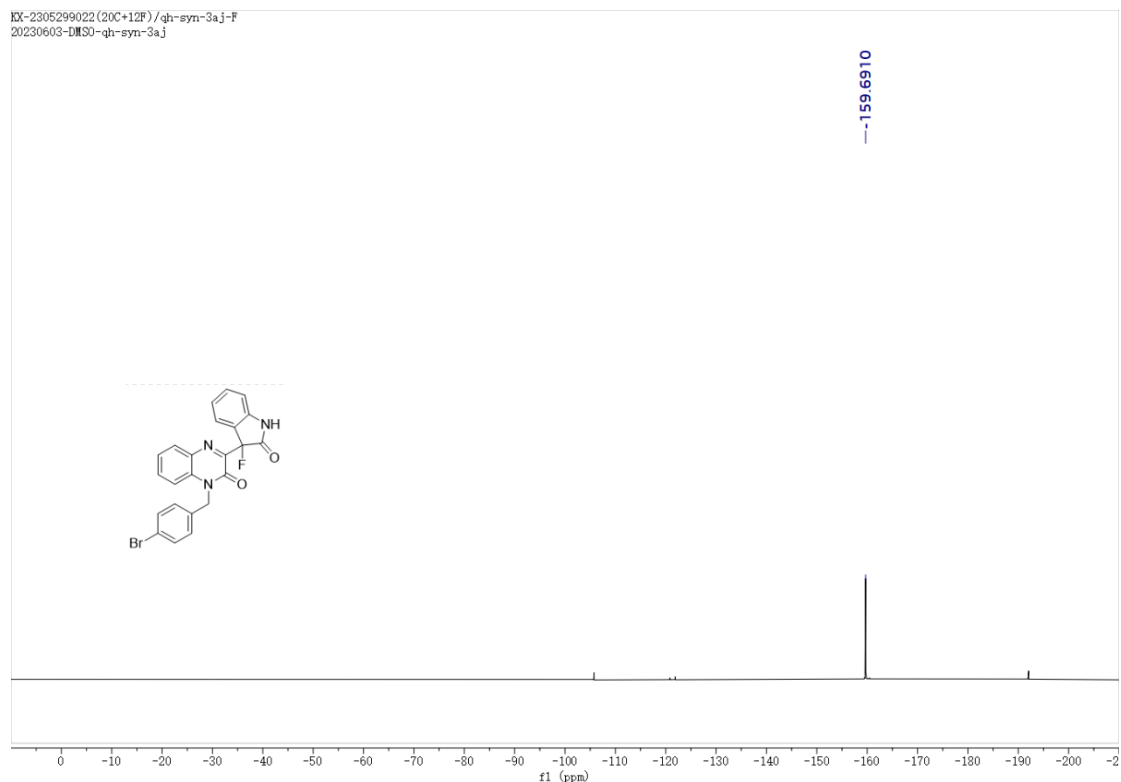

**Figure S135** The  $^{19}\text{F}$  NMR Spectrum of Compound **3aj** in  $\text{DMSO-}d_6$

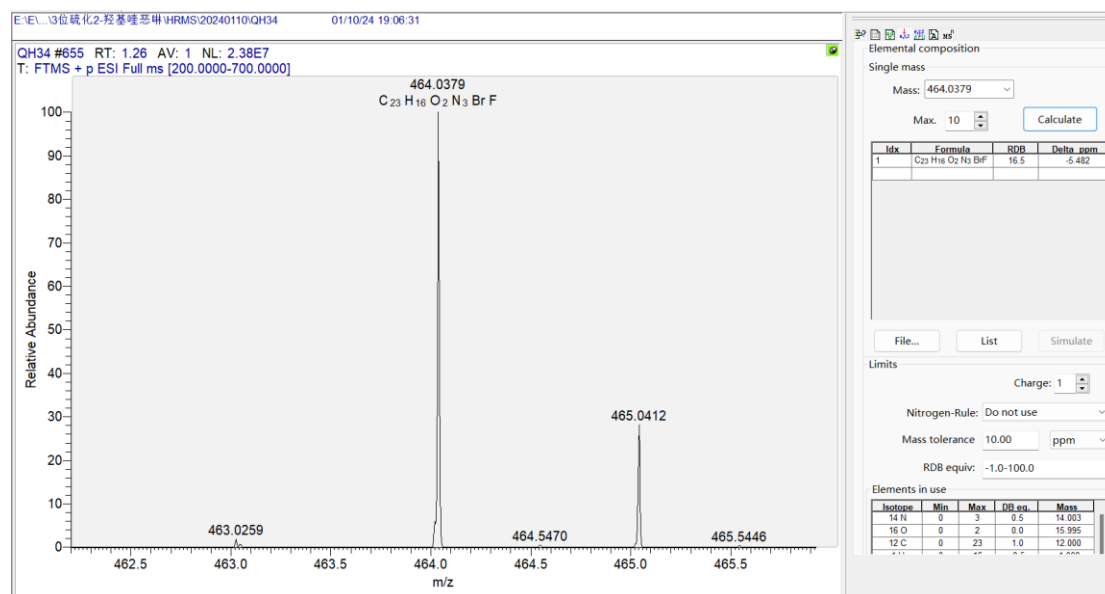

**Figure S136.** The HR-ESI-MS Spectrum of Compound **3aj**



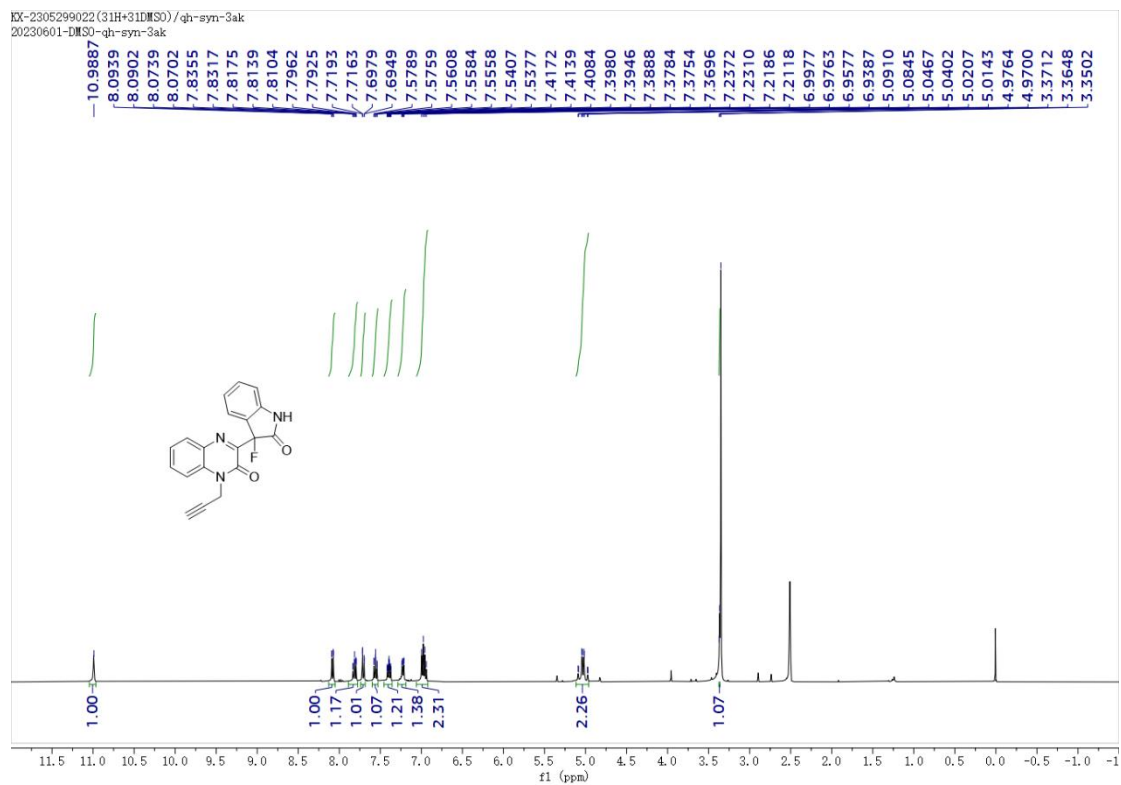

Figure S137 The  $^1\text{H}$  NMR Spectrum of Compound **3ak** in  $\text{DMSO}-d_6$

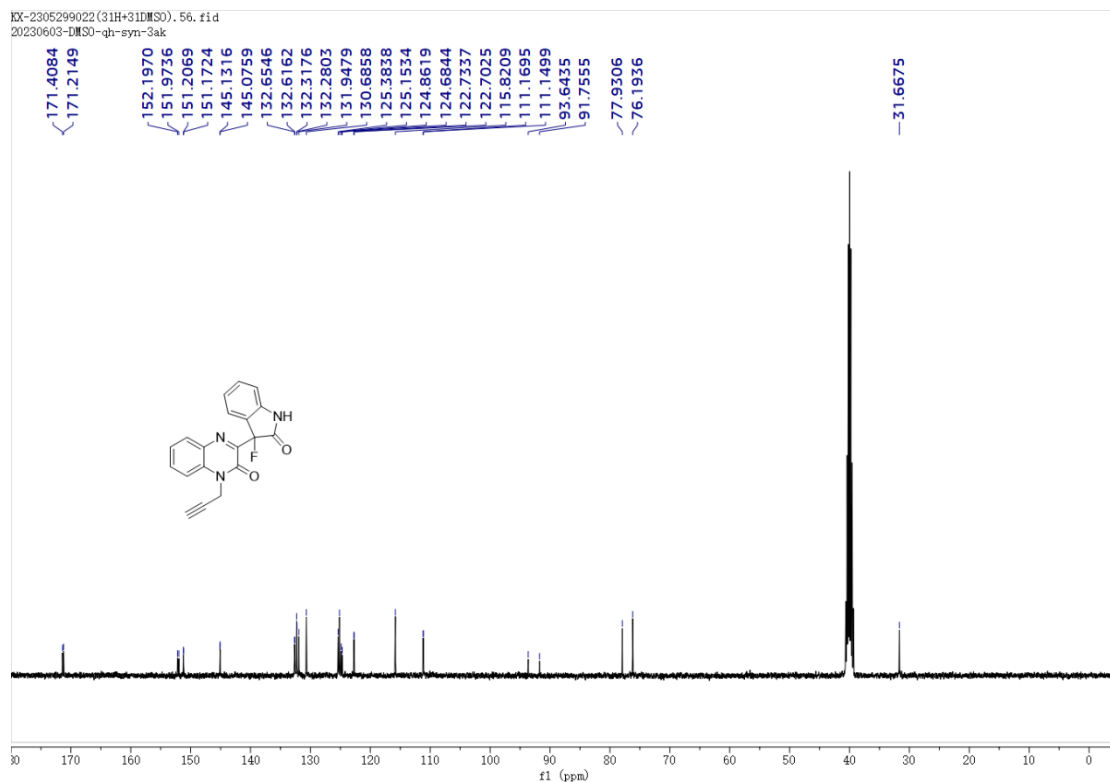

Figure S138 The  $^{13}\text{C}$  NMR Spectrum of Compound **3ak** in  $\text{DMSO}-d_6$

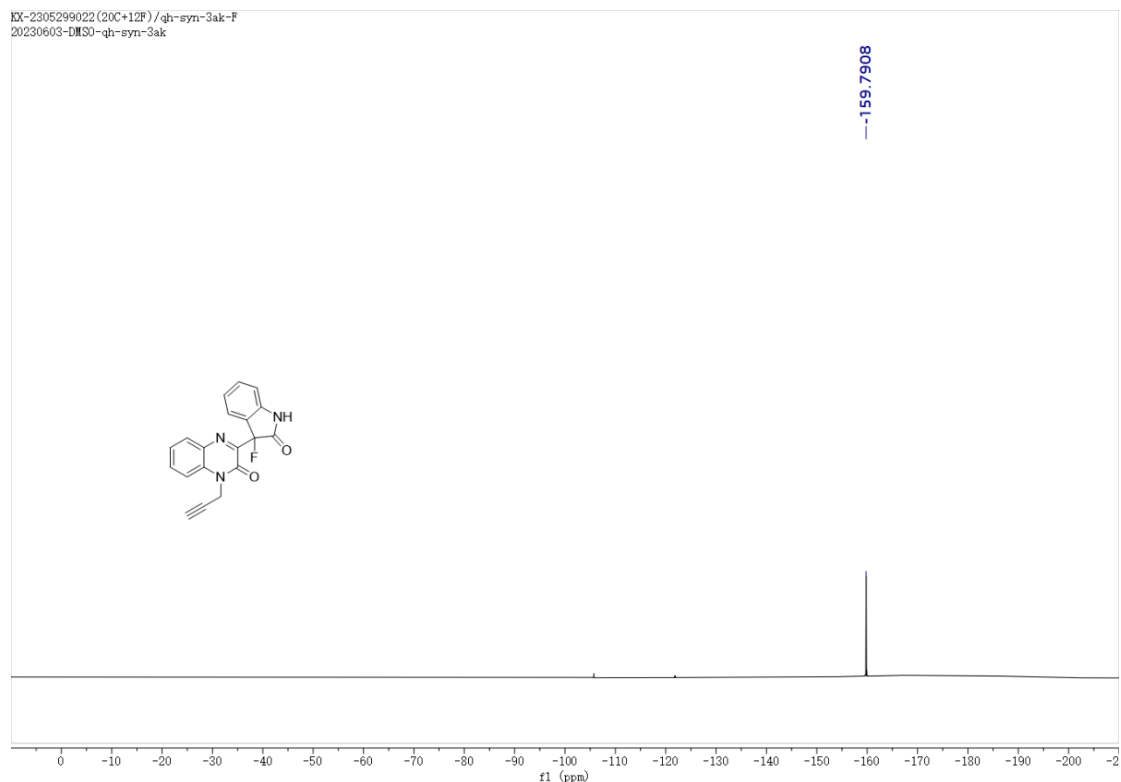

**Figure S139** The  $^{19}\text{F}$  NMR Spectrum of Compound **3ak** in  $\text{DMSO-}d_6$

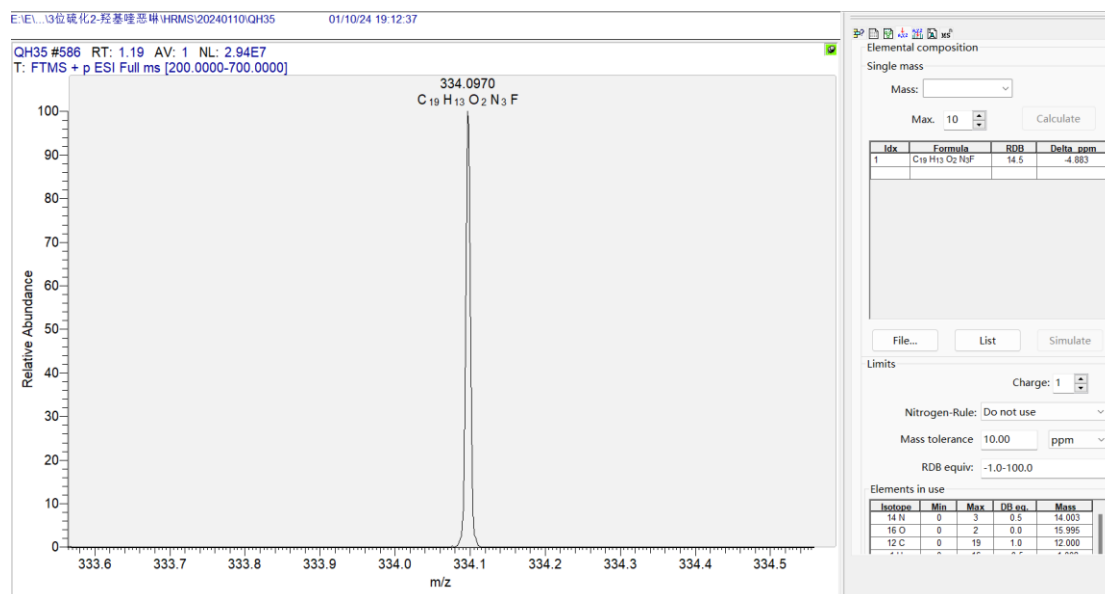

**Figure S140.** The HR-ESI-MS Spectrum of Compound **3ak**

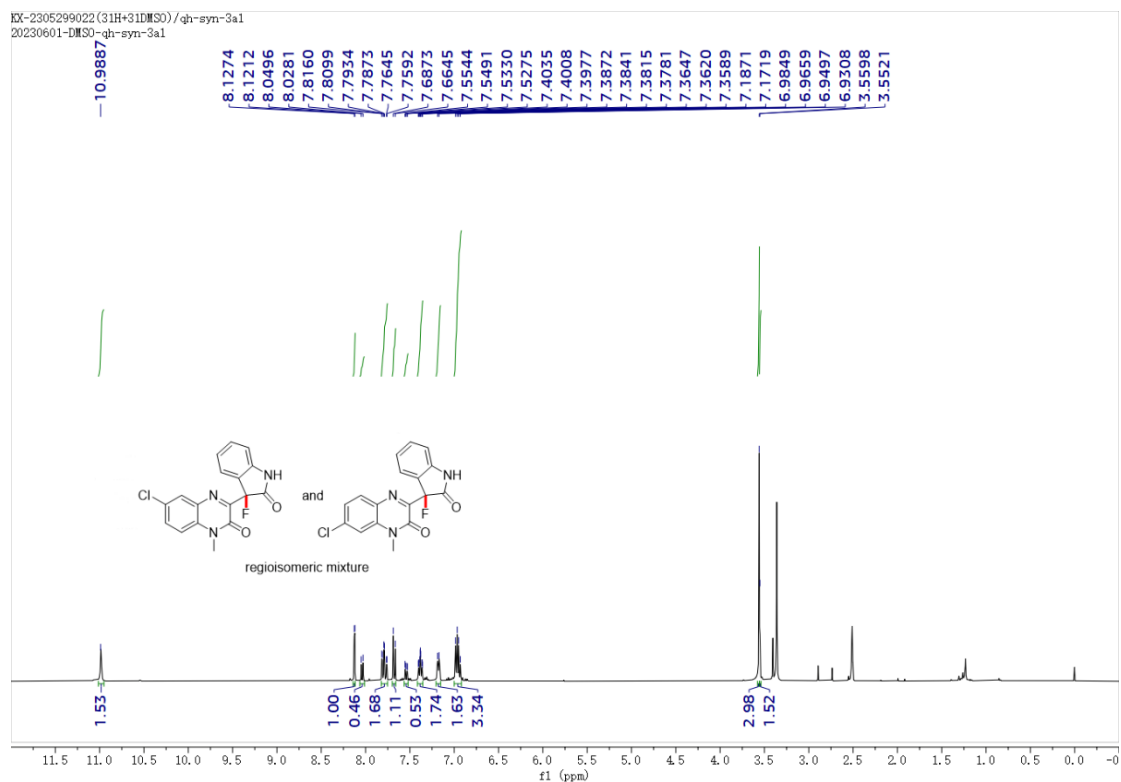

Figure S141 The  $^1\text{H}$  NMR Spectrum of Compound **3a1** in  $\text{DMSO}-d_6$

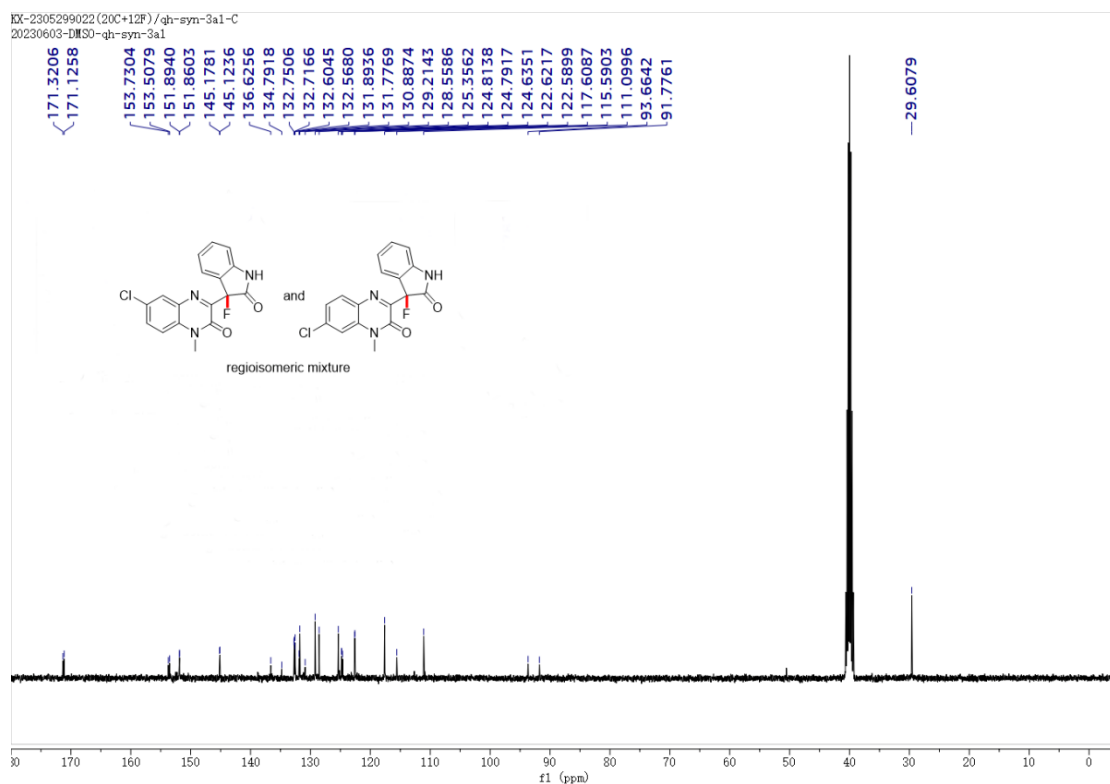

Figure S142 The  $^{13}\text{C}$  NMR Spectrum of Compound **3a1** in  $\text{DMSO}-d_6$

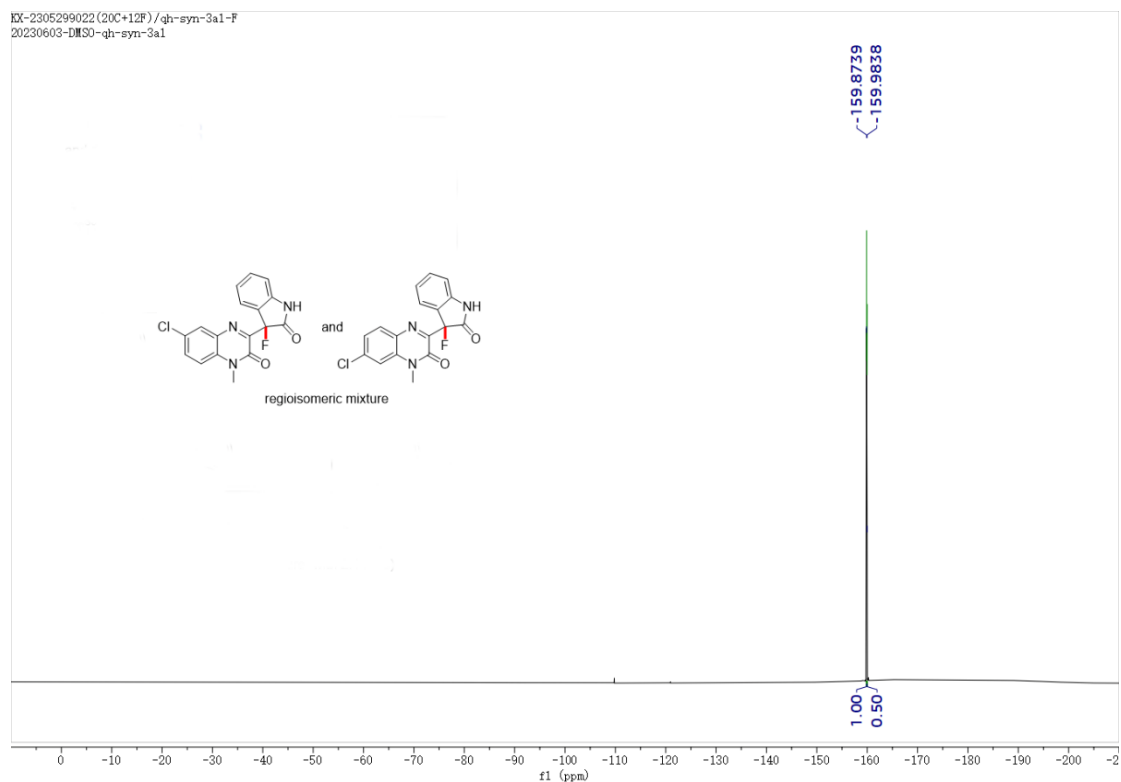

**Figure S143** The  $^{19}\text{F}$  NMR Spectrum of Compound **3a1** in  $\text{DMSO}-d_6$

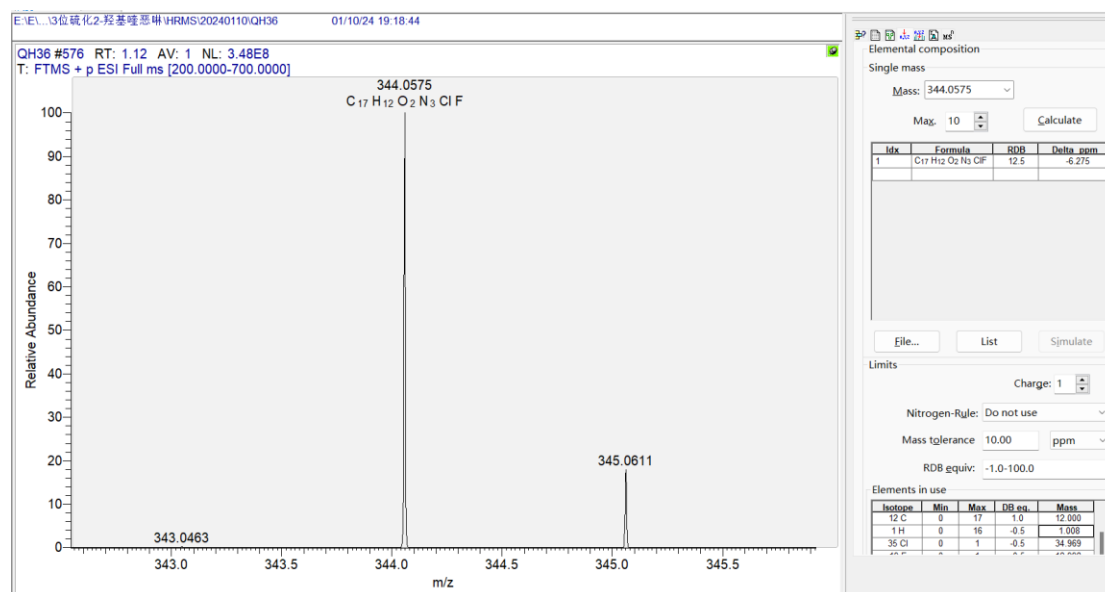

**Figure S144.** The HR-ESI-MS Spectrum of Compound **3a1**

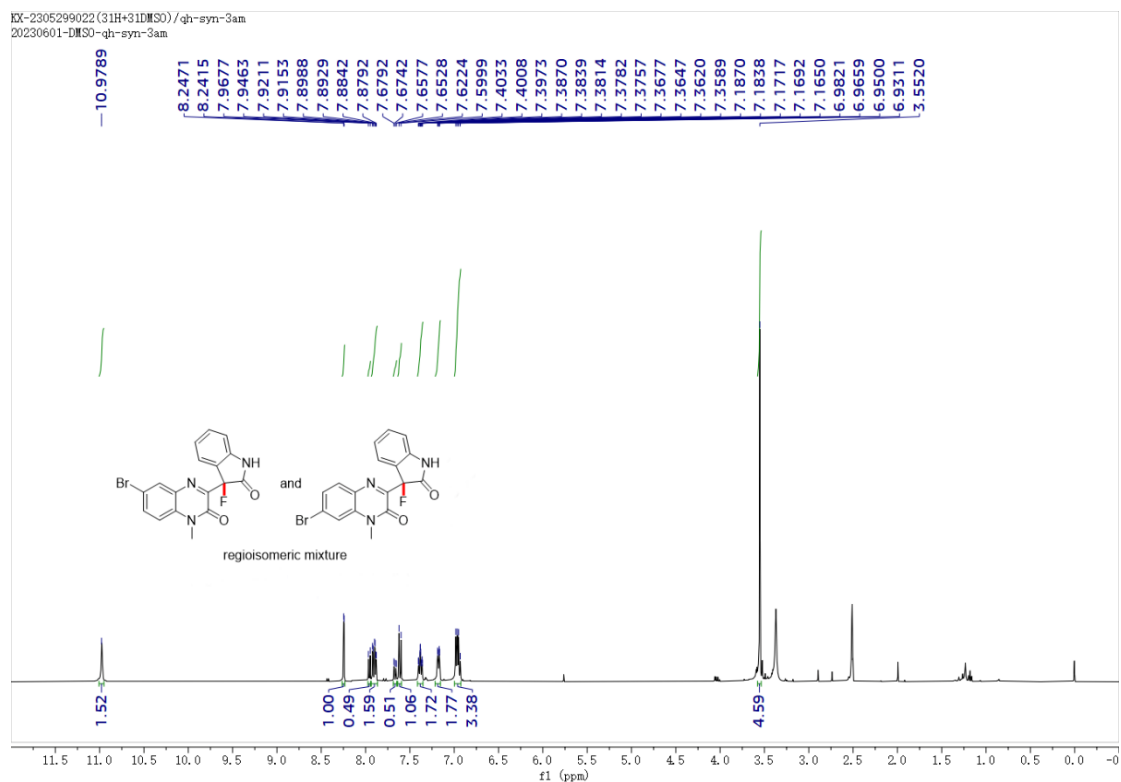

Figure S145 The  $^1\text{H}$  NMR Spectrum of Compound 3am in  $\text{DMSO}-d_6$

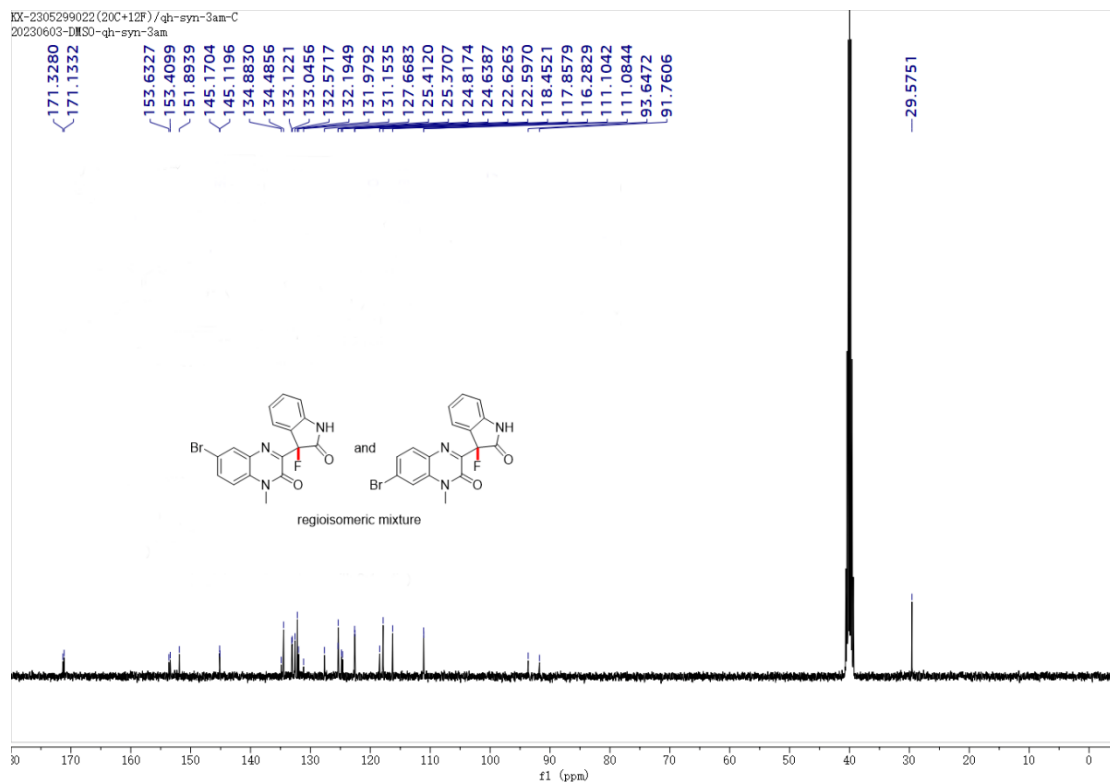

Figure S146 The  $^{13}\text{C}$  NMR Spectrum of Compound 3am in  $\text{DMSO}-d_6$

KX-2305299022 (20C+12F) / qh-syn-3am-F  
20230603-DMSO-qh-syn-3am

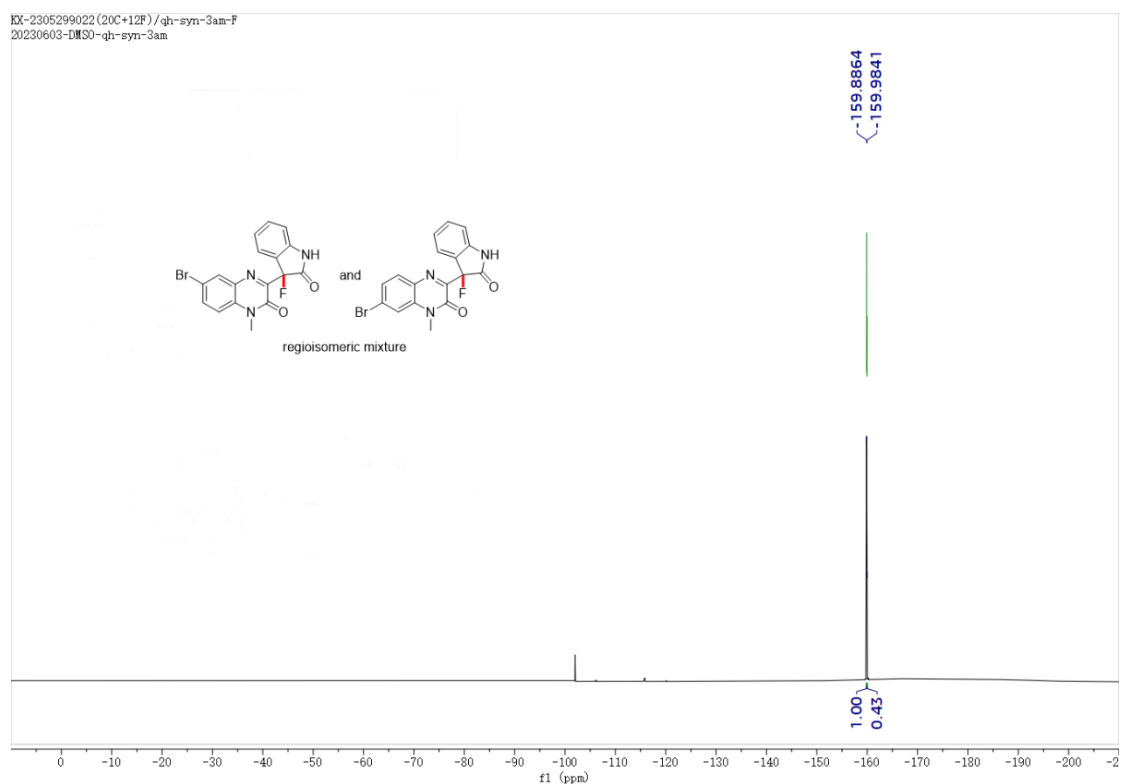

**Figure S147** The  $^{19}\text{F}$  NMR Spectrum of Compound **3am** in  $\text{DMSO}-d_6$

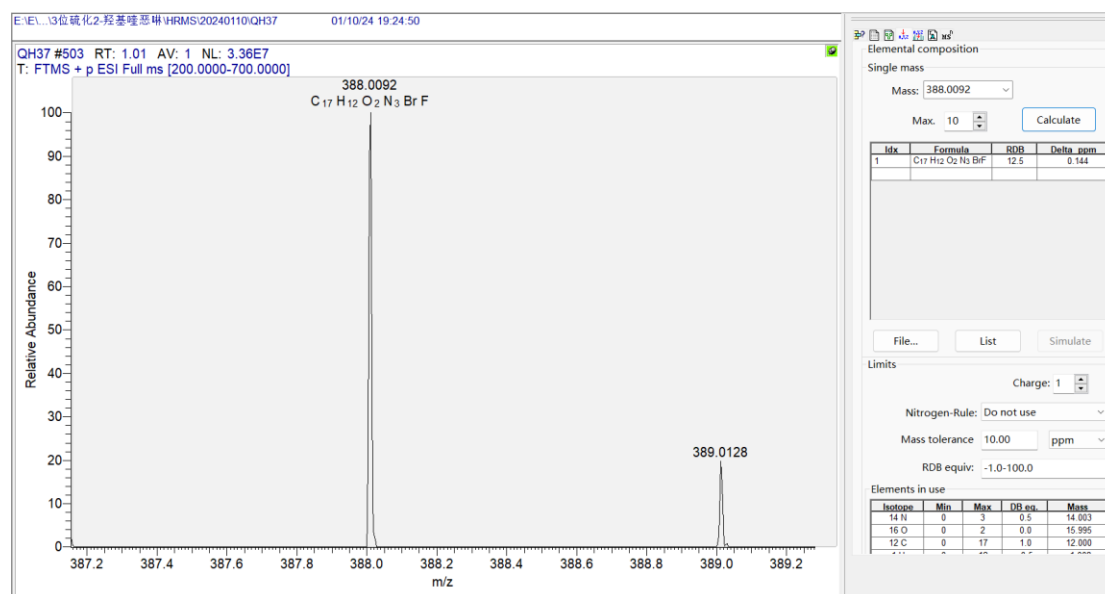

**Figure S148.** The HR-ESI-MS Spectrum of Compound **3am**

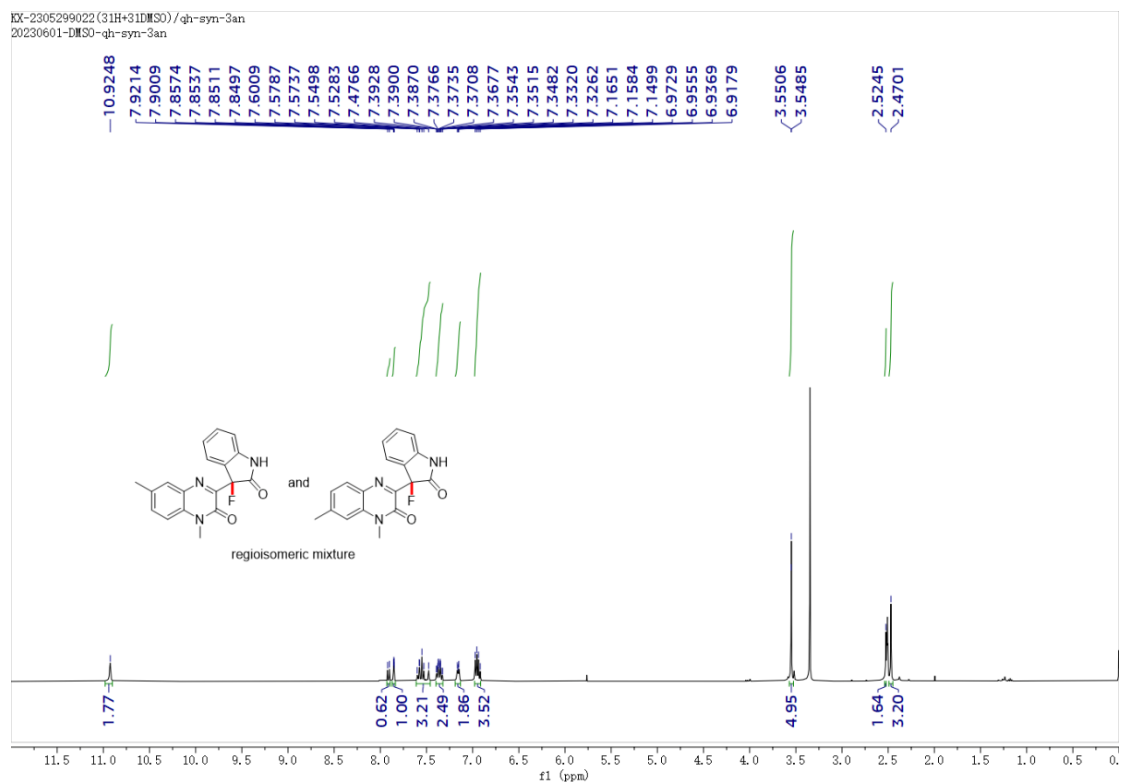

**Figure S149** The  $^1\text{H}$  NMR Spectrum of Compound **3an** in  $\text{DMSO}-d_6$

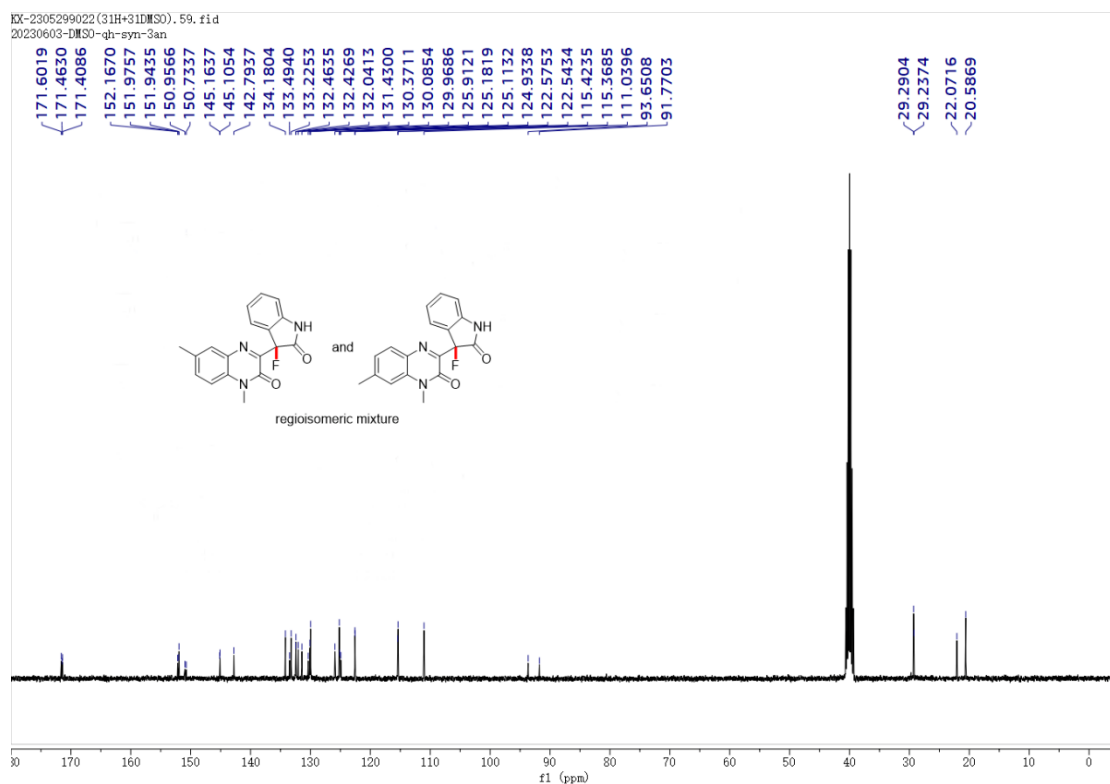

**Figure S150** The  $^{13}\text{C}$  NMR Spectrum of Compound **3an** in  $\text{DMSO}-d_6$

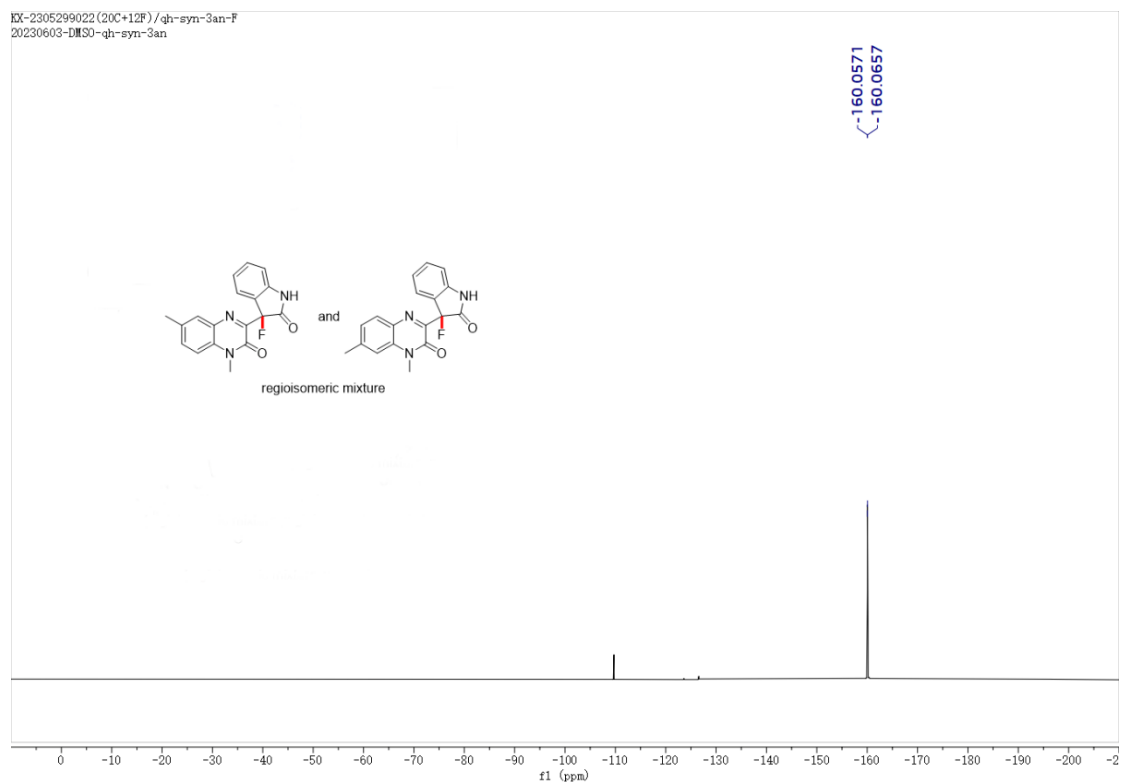

**Figure S151** The  $^{19}\text{F}$  NMR Spectrum of Compound **3an** in  $\text{DMSO-}d_6$

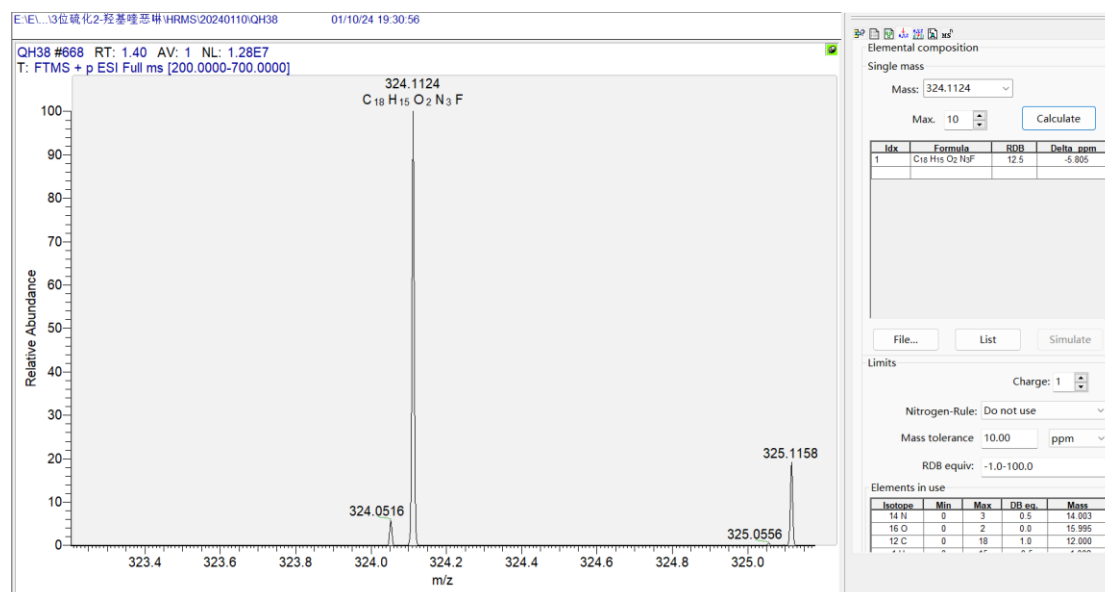

**Figure S152.** The HR-ESI-MS Spectrum of Compound **3an**



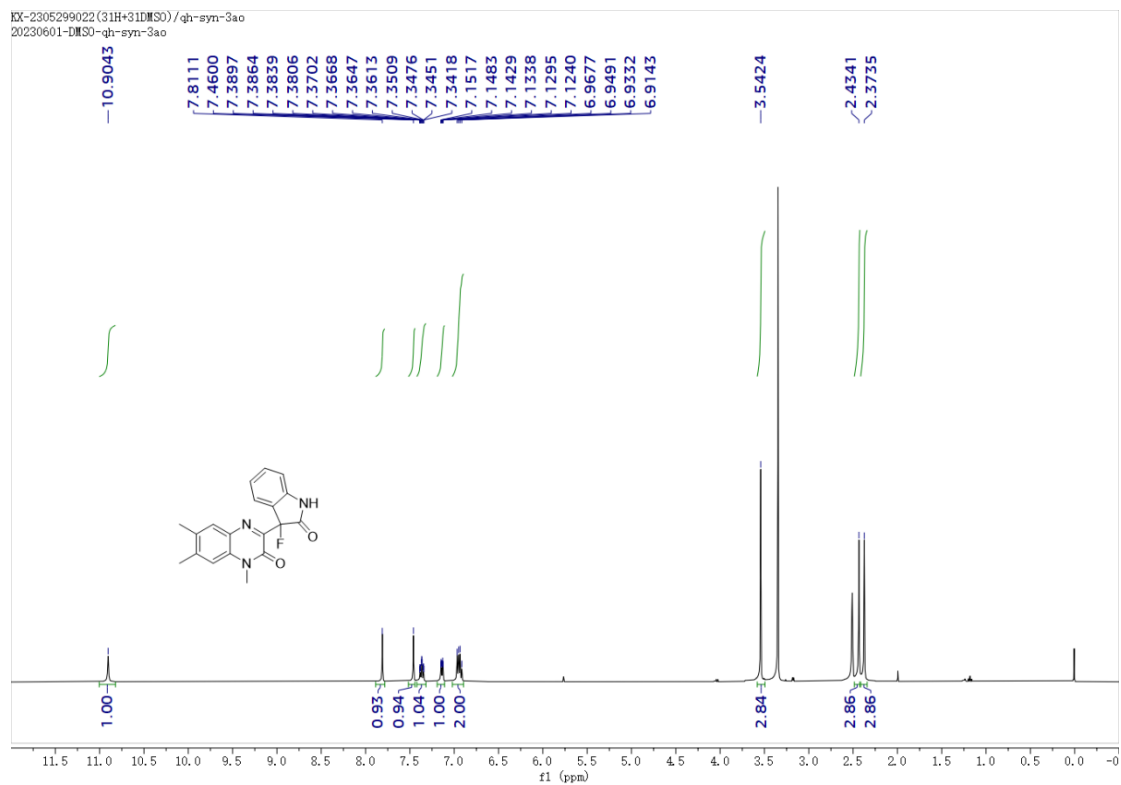

**Figure S153** The <sup>1</sup>H NMR Spectrum of Compound **3ao** in DMSO-*d*<sub>6</sub>

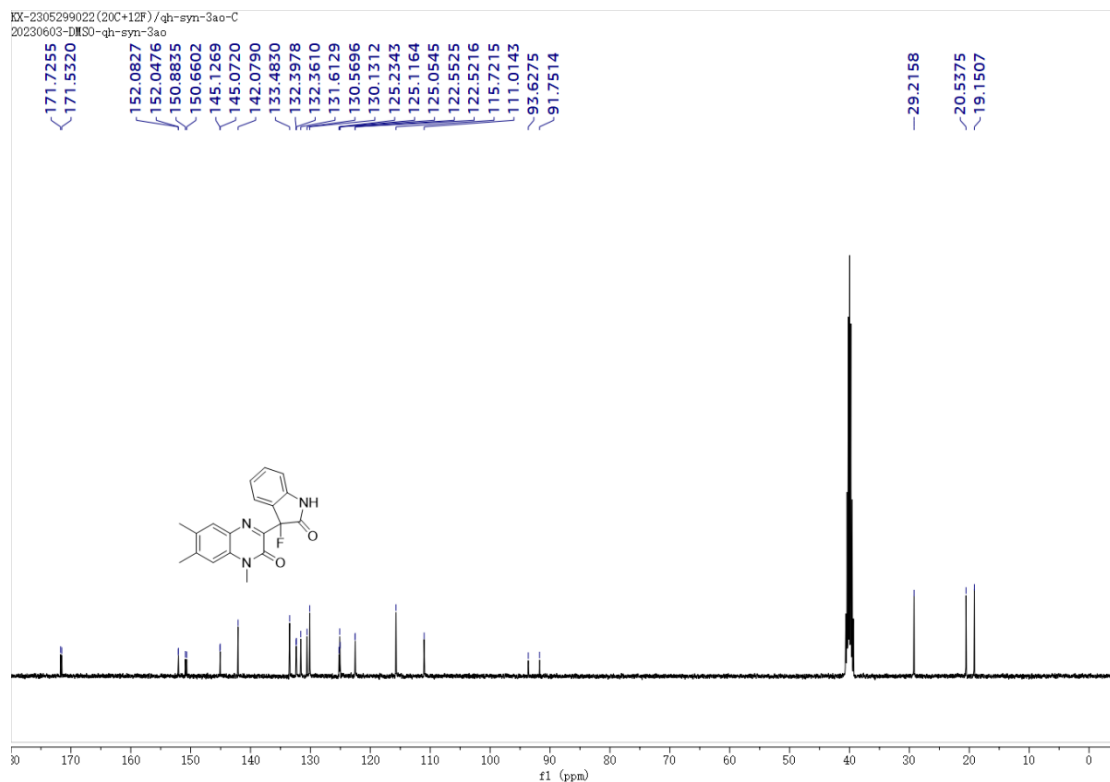

**Figure S154** The <sup>13</sup>C NMR Spectrum of Compound **3ao** in DMSO-*d*<sub>6</sub>

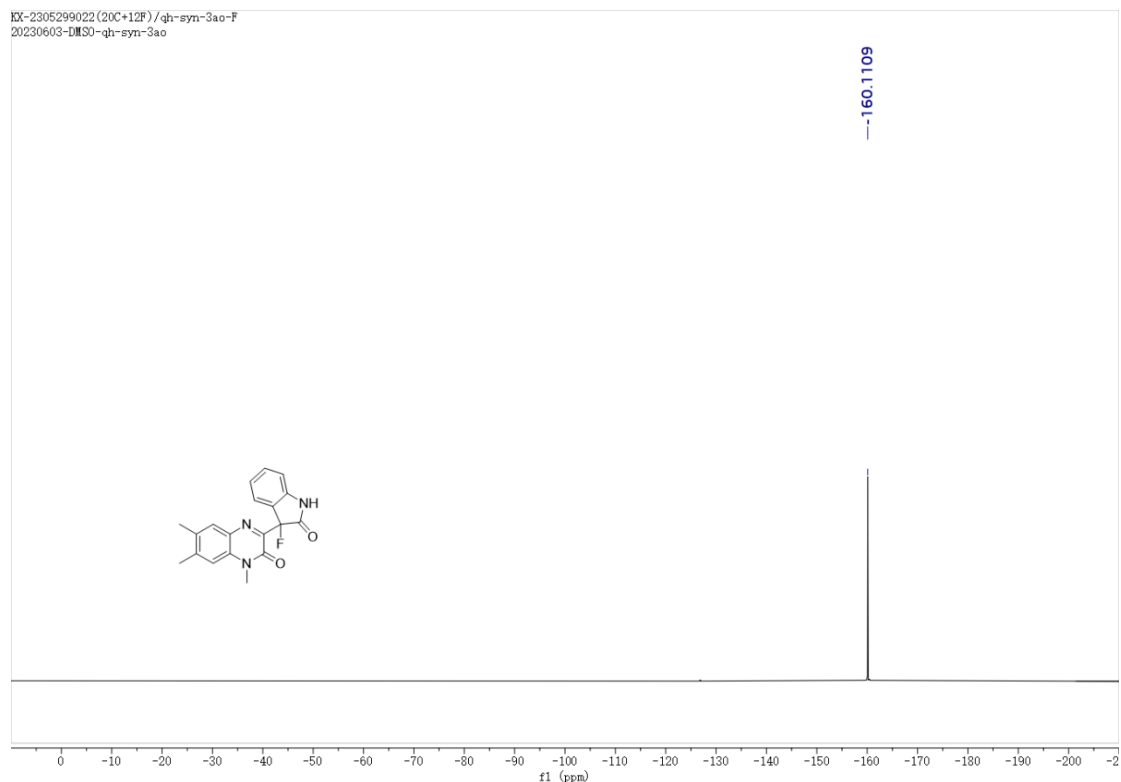

**Figure S155** The  $^{19}\text{F}$  NMR Spectrum of Compound **3ao** in  $\text{DMSO-}d_6$

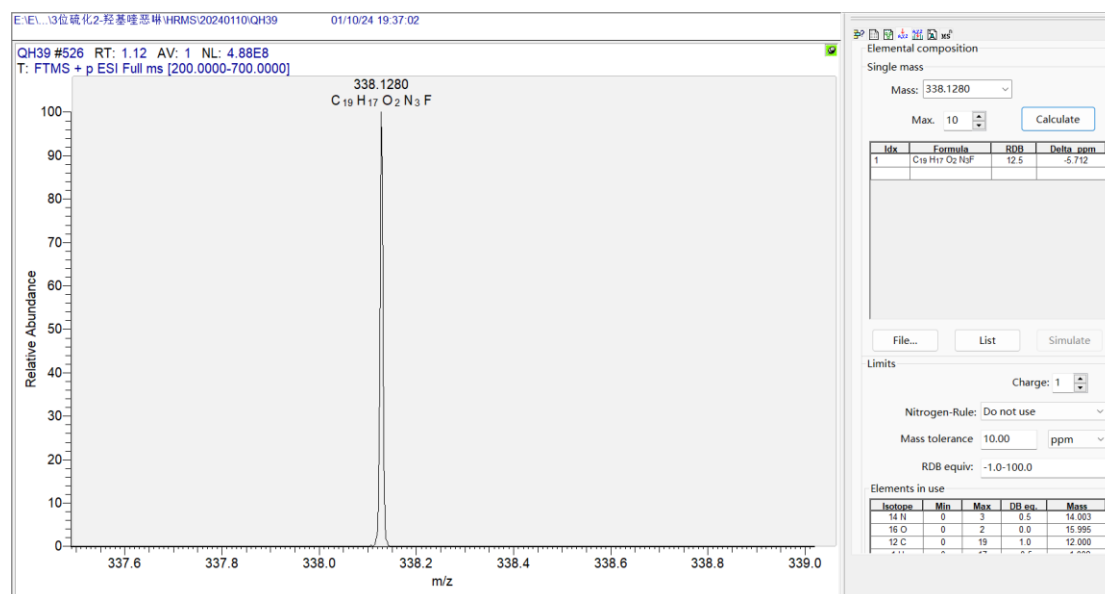

**Figure S156.** The HR-ESI-MS Spectrum of Compound **3ao**

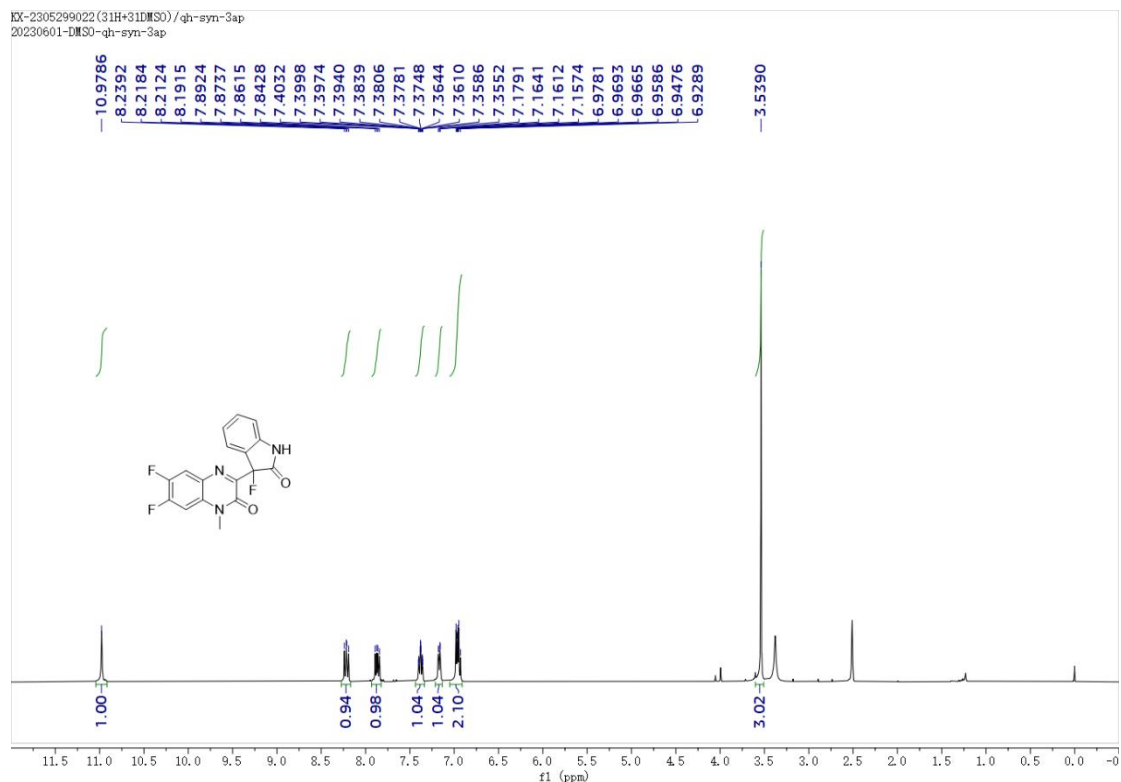

Figure S157 The  $^1\text{H}$  NMR Spectrum of Compound **3ap** in  $\text{DMSO}-d_6$

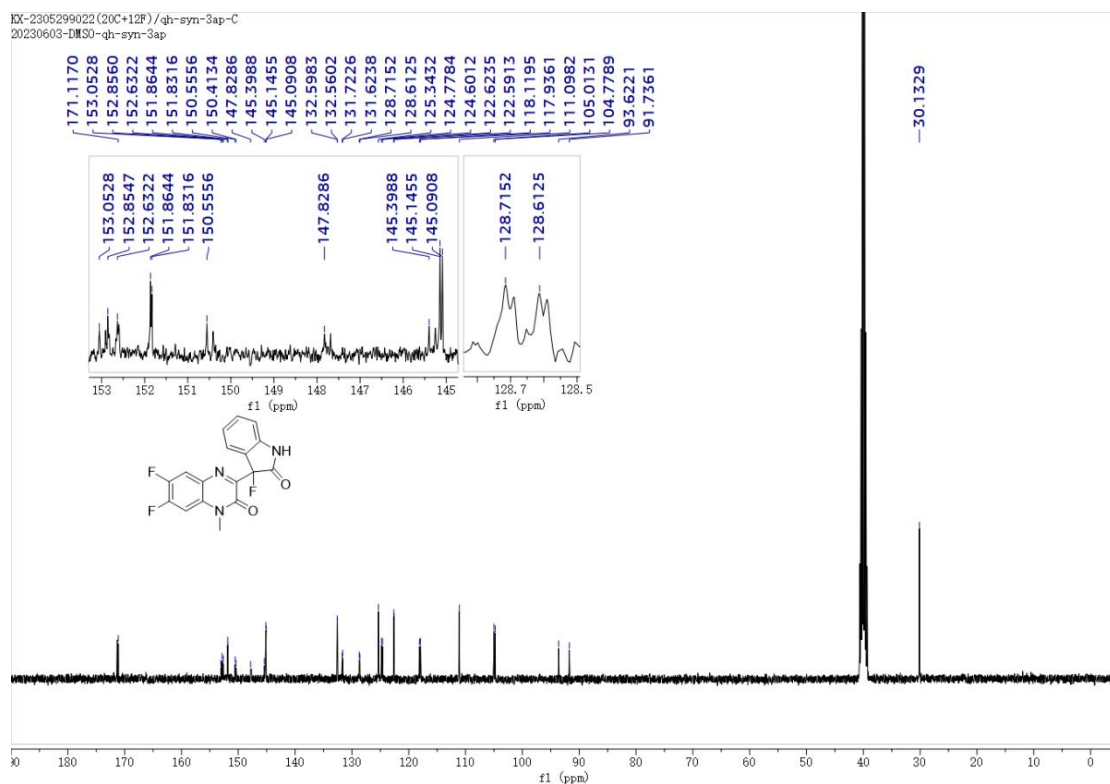

Figure S158 The  $^{13}\text{C}$  NMR Spectrum of Compound **3ap** in  $\text{DMSO}-d_6$

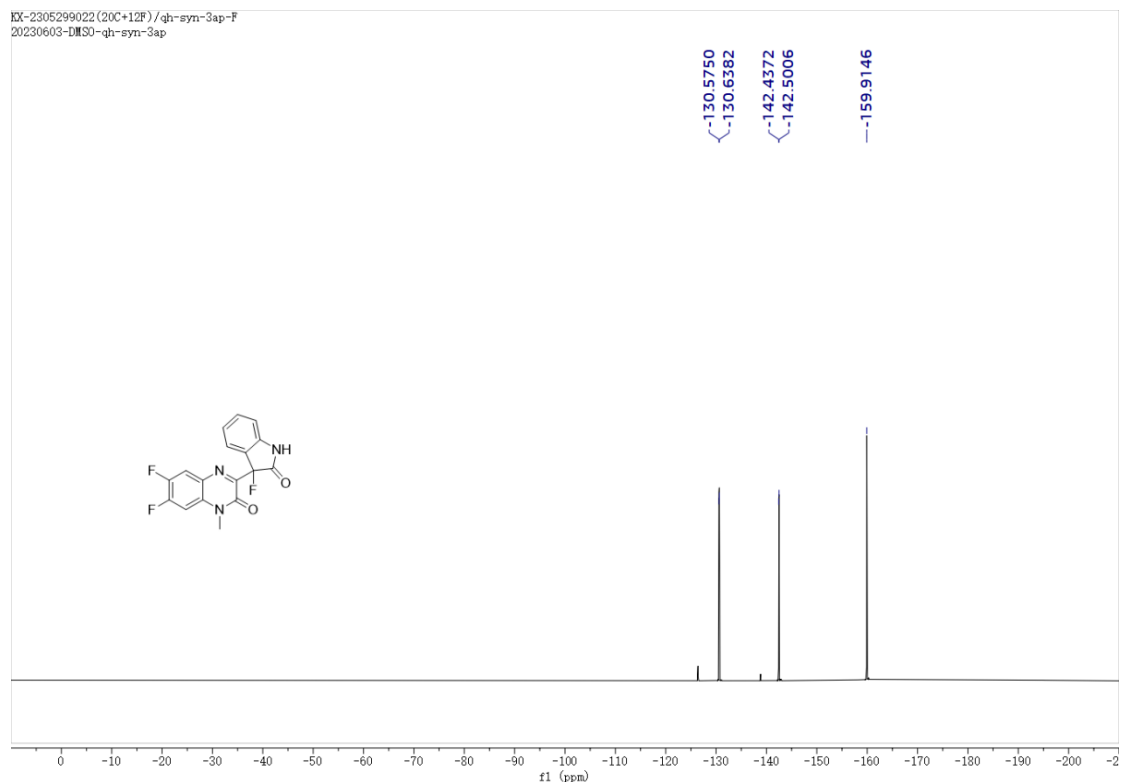

**Figure S159** The  $^{19}\text{F}$  NMR Spectrum of Compound **3ap** in  $\text{DMSO}-d_6$

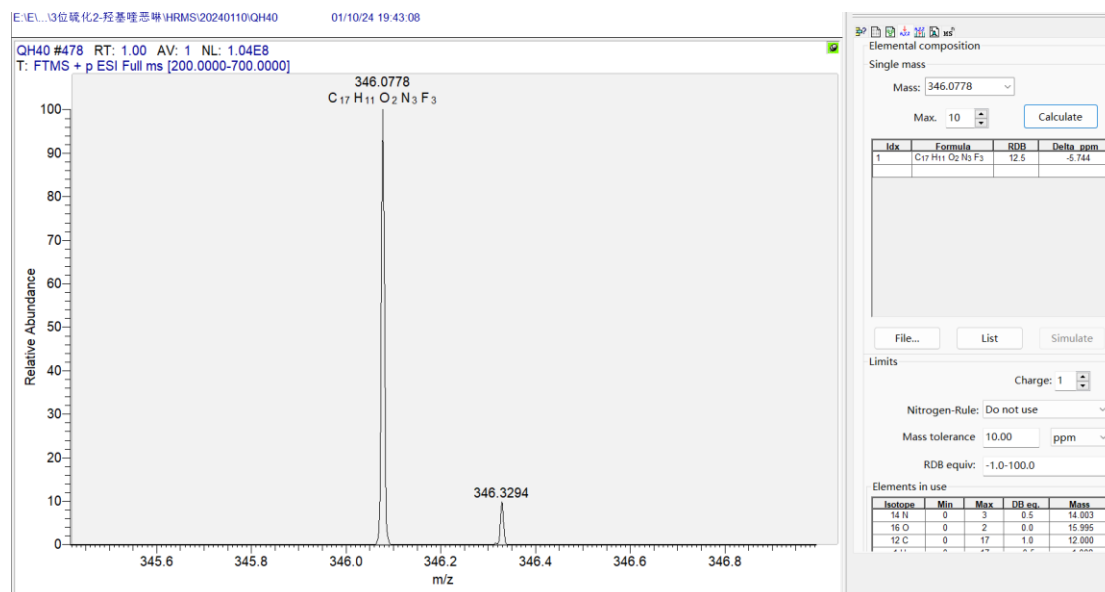

**Figure S160.** The HR-ESI-MS Spectrum of Compound **3ap**

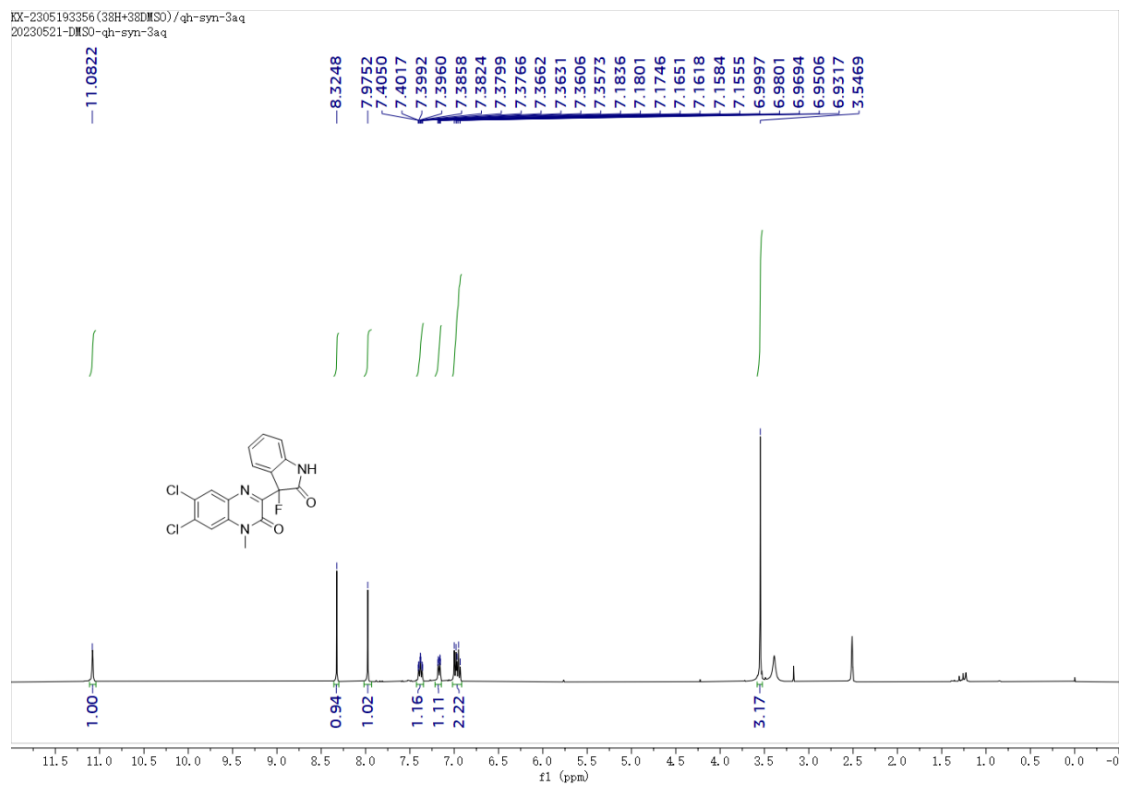

**Figure S161** The  $^1\text{H}$  NMR Spectrum of Compound **3aq** in  $\text{DMSO-}d_6$

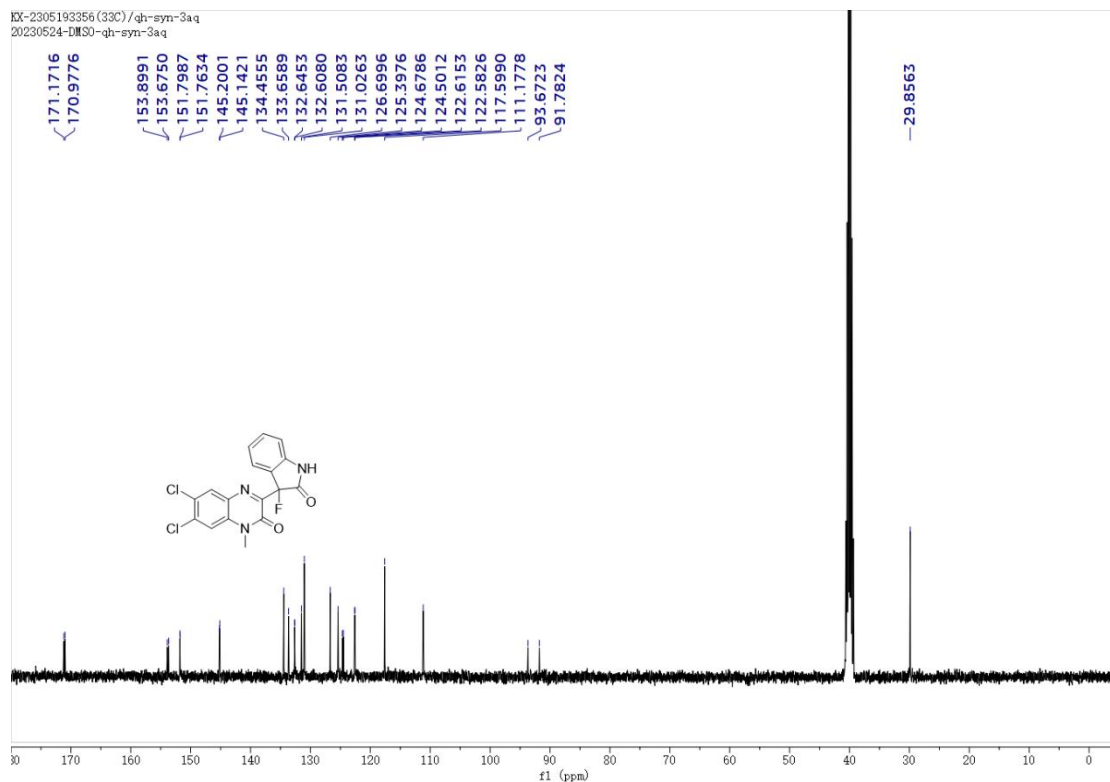

**Figure S162** The  $^{13}\text{C}$  NMR Spectrum of Compound **3aq** in  $\text{DMSO-}d_6$

KX-2305193356 (29F) / qh-syn-3aq  
20230524-DMSO-qh-syn-3aq

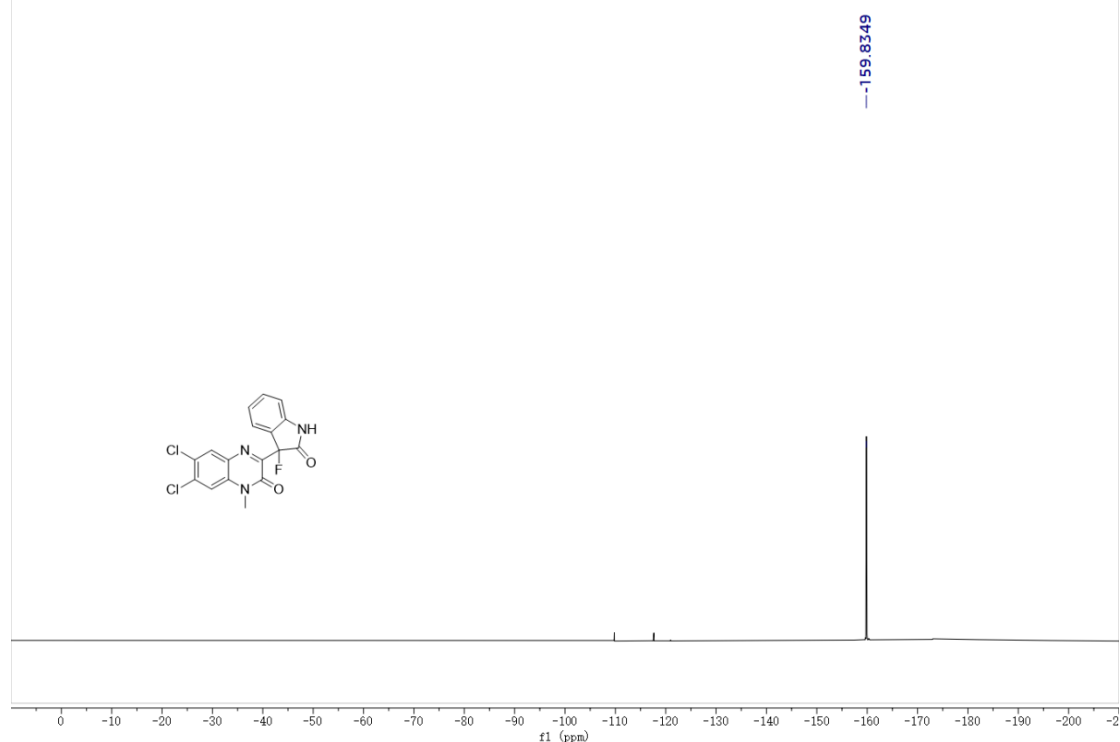

**Figure S163** The  $^{19}\text{F}$  NMR Spectrum of Compound **3aq** in  $\text{DMSO-}d_6$

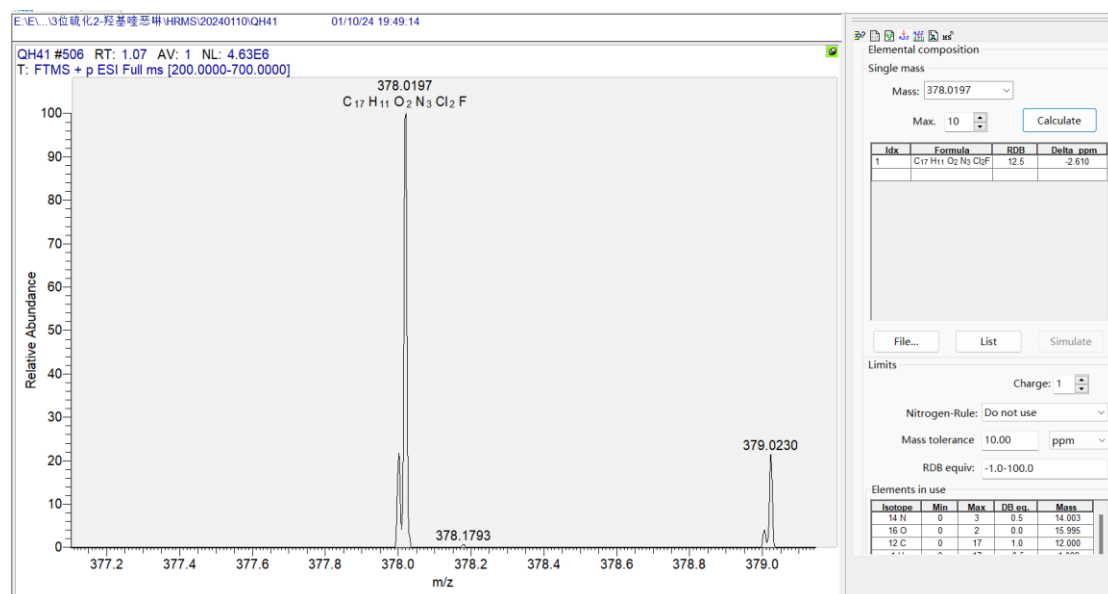

**Figure S164.** The HR-ESI-MS Spectrum of Compound **3aq**

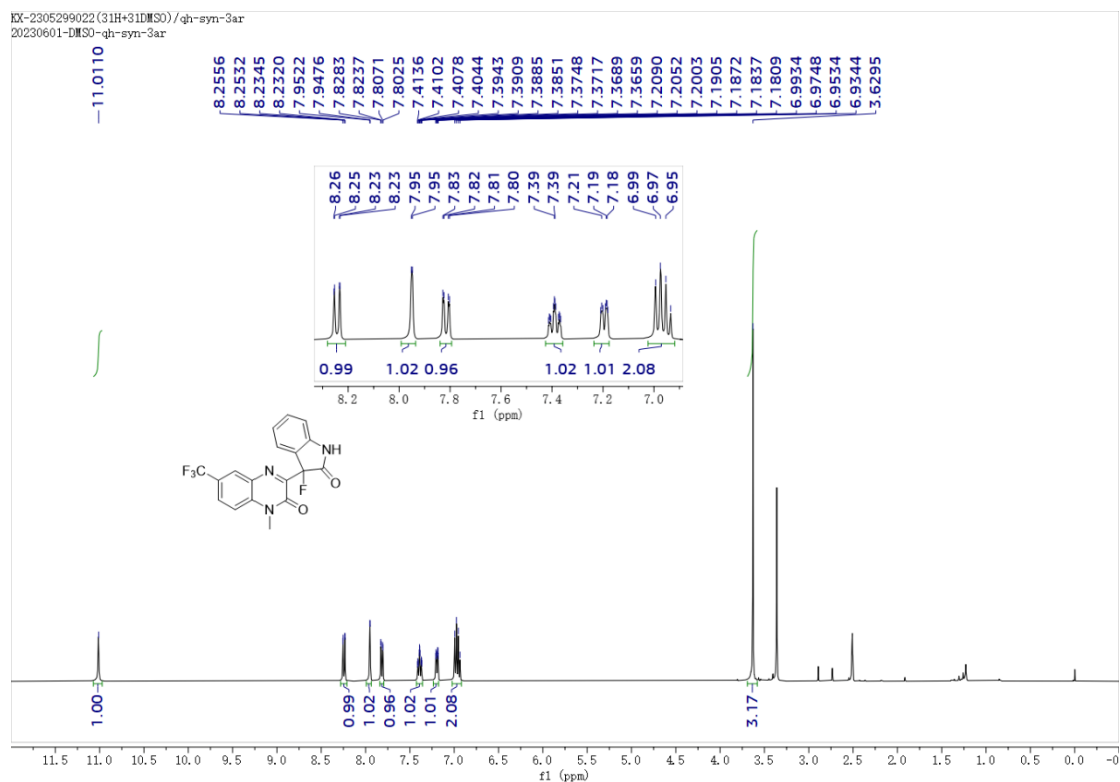

**Figure S165** The <sup>1</sup>H NMR Spectrum of Compound **3ar** in DMSO-*d*<sub>6</sub>

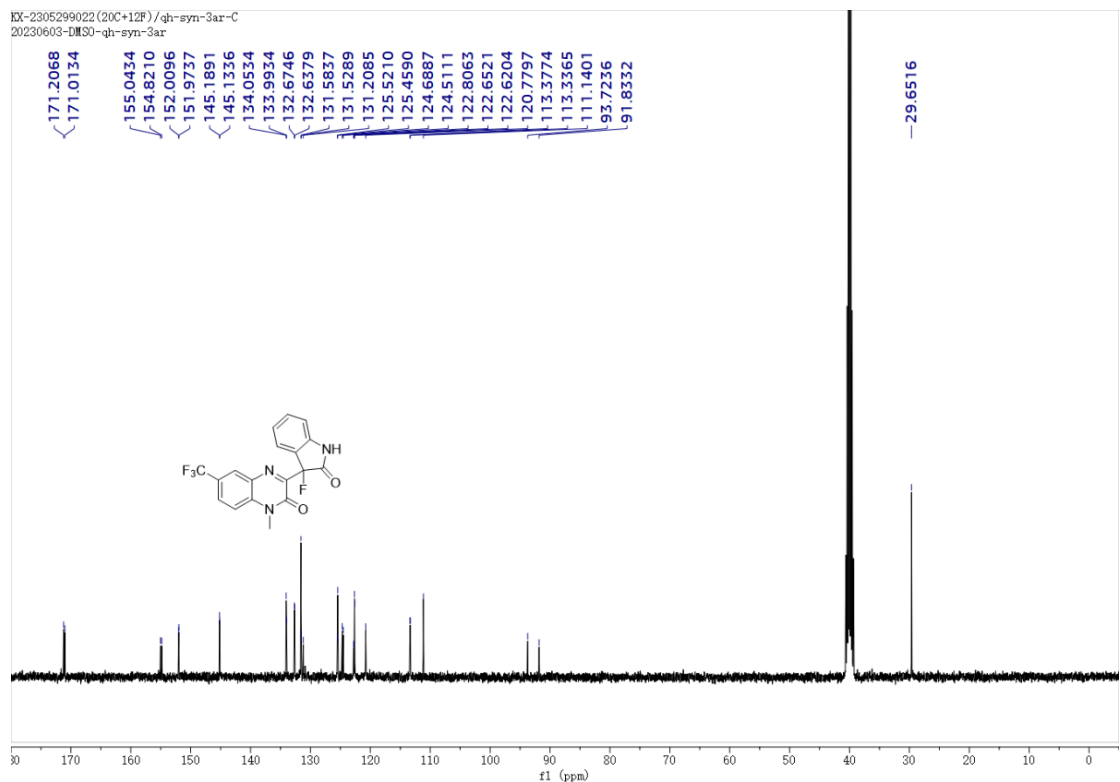

**Figure S166** The <sup>13</sup>C NMR Spectrum of Compound **3ar** in DMSO-*d*<sub>6</sub>

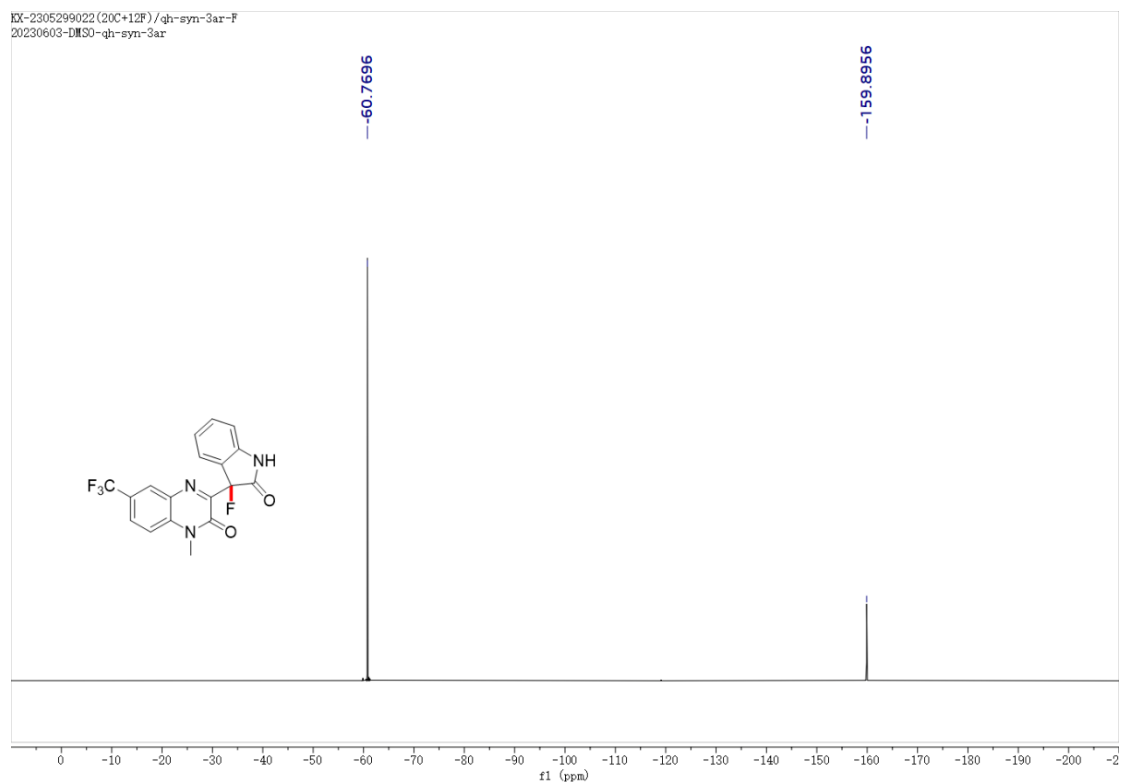

**Figure S167** The  $^{19}\text{F}$  NMR Spectrum of Compound **3ar** in  $\text{DMSO-}d_6$

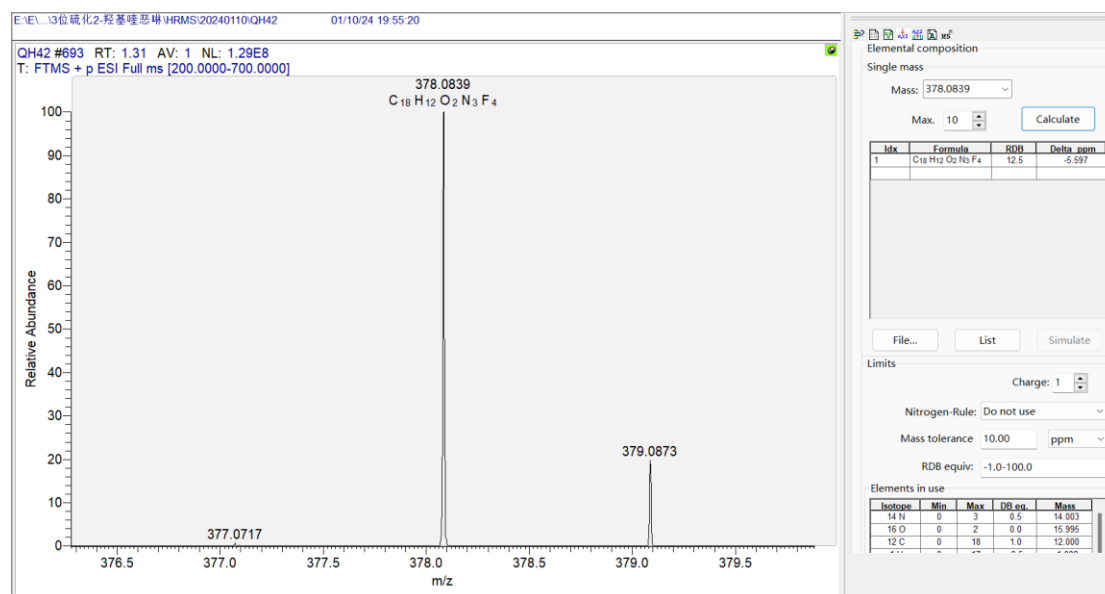

**Figure S168** The HR-ESI-MS Spectrum of Compound **3ar**



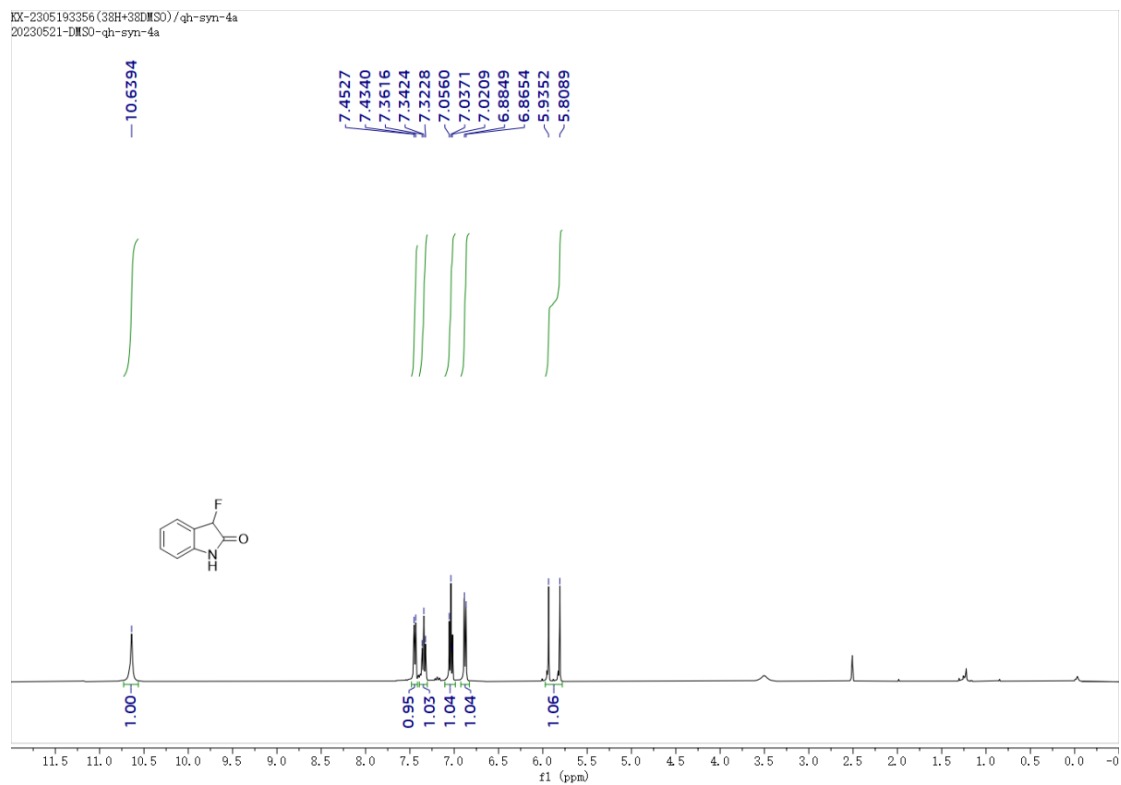

**Figure S169** The  $^1\text{H}$  NMR Spectrum of Compound **4a** in  $\text{DMSO-}d_6$

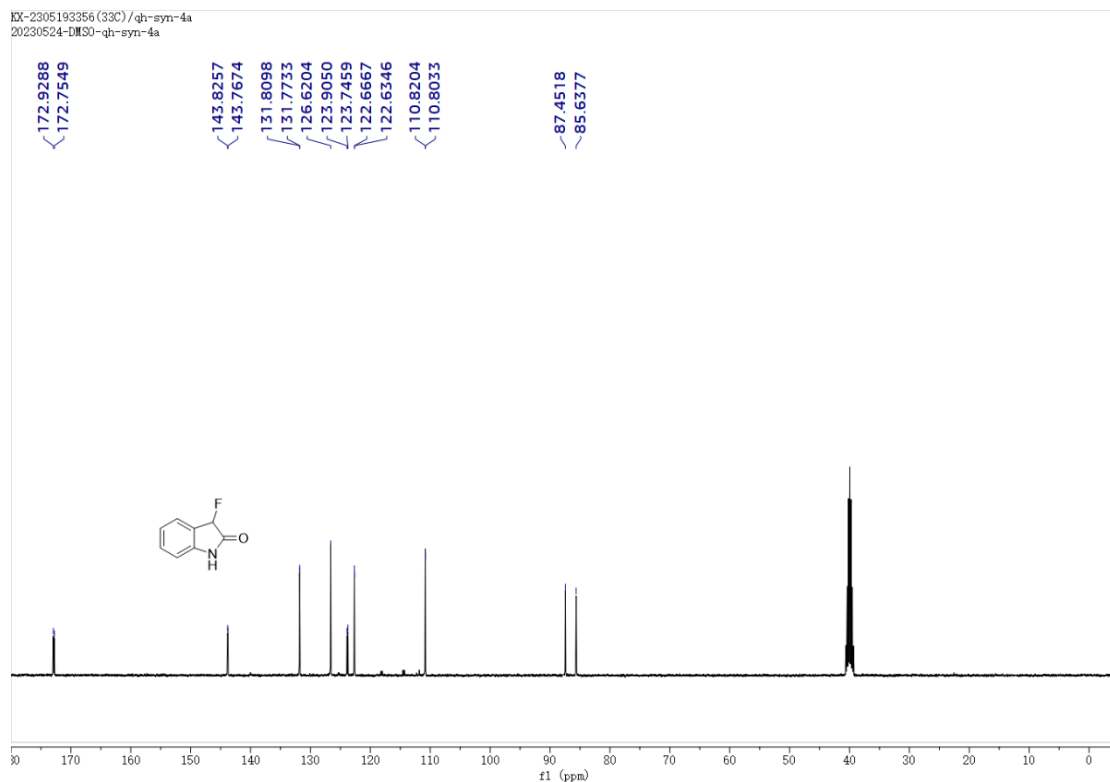

**Figure S170** The  $^{13}\text{C}$  NMR Spectrum of Compound **4a** in  $\text{DMSO-}d_6$

KK-2305193356 (29F) / qh-syn-4a  
20230524-DMSO-qh-syn-4a

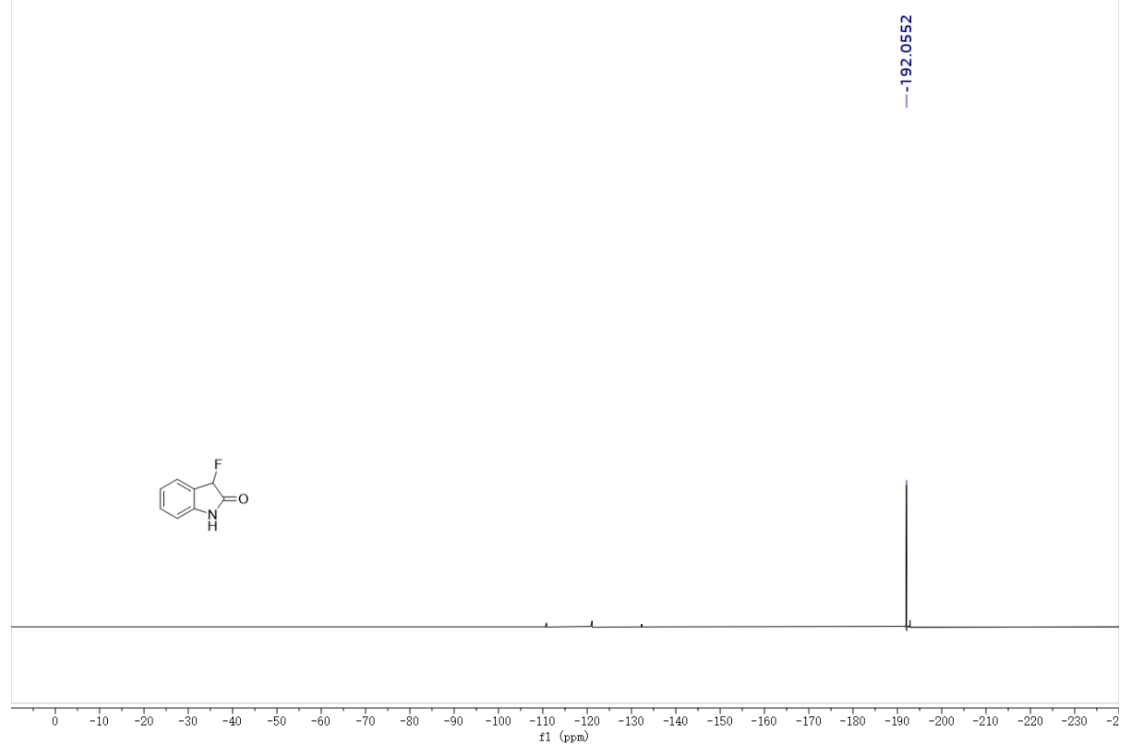

Figure S171 The <sup>19</sup>F NMR Spectrum of Compound 4a in DMSO-*d*<sub>6</sub>

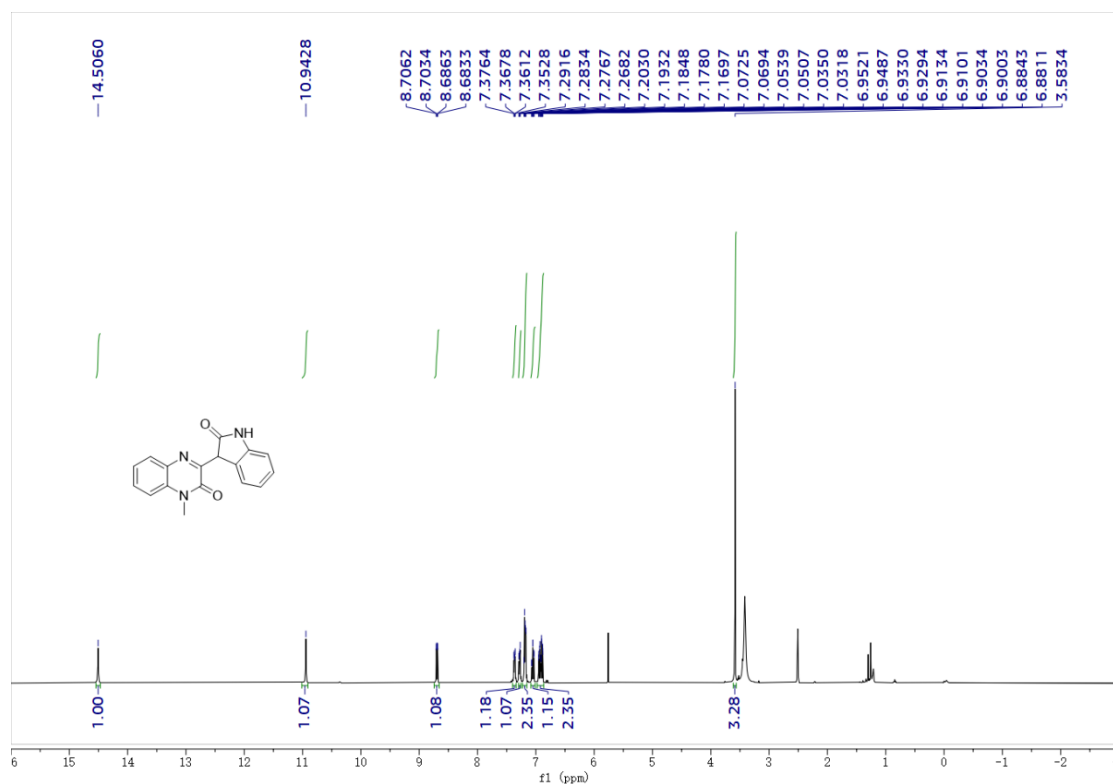

Figure S172 The <sup>1</sup>H NMR Spectrum of Compound 5a in DMSO-*d*<sub>6</sub>

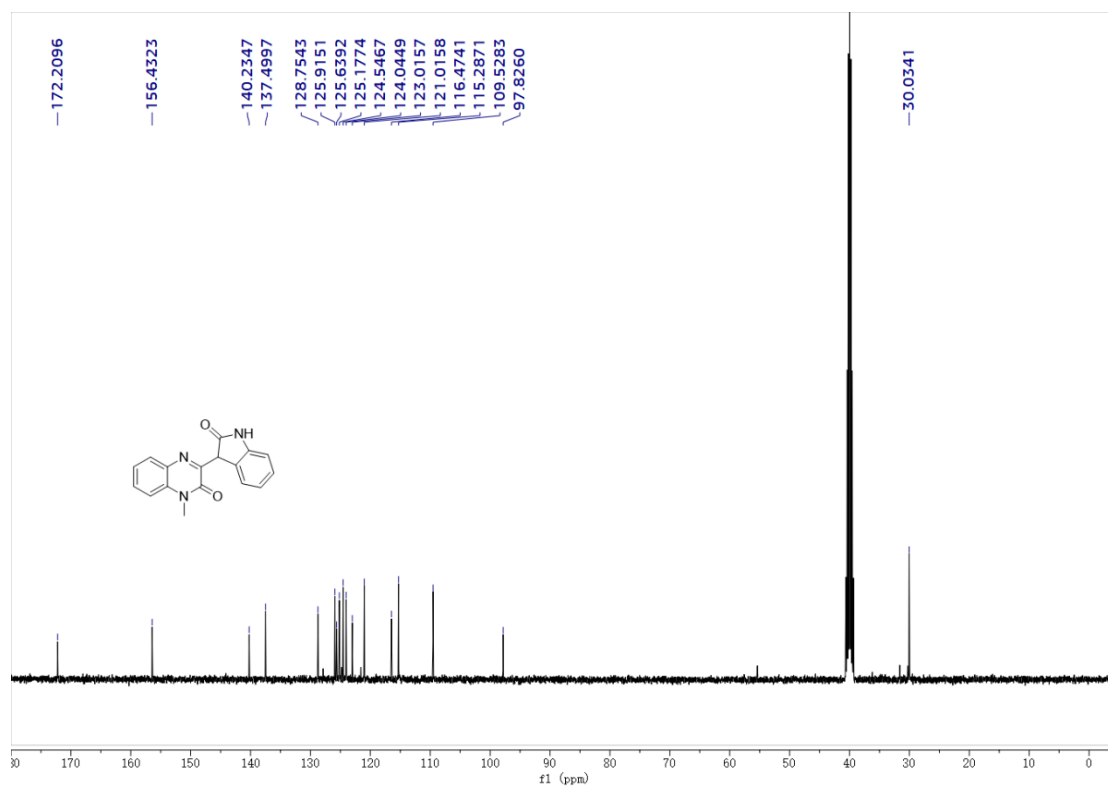

**Figure S173** The <sup>13</sup>C NMR Spectrum of Compound **5a** in DMSO-*d*<sub>6</sub>
